# Supplementary material
Source: MDPI journal article supplement (https://www.mdpi.com/2076-2607/10/5/1025)
Supplement: s1 [file s1]

Archive with 2 entries (2 files):
- Supplementary Figures (2).pdf
- supplementary tables.xlsx
