# Supplementary material for: Composition, Structure and Diversity of Soil Bacterial Communities before, during and after Transit through the Gut of the Earthworm Aporrectodea caliginosa
Source: MDPI journal article supplement (doi:10.3390/microorganisms10051025), 2022-05-13
Supplement: s1 [file s1 › supplementary tables.xlsx]

## Sheet: ST1
Supplementary Table S1. Native bacterial ASVs from soil, gut and cast bacterial communities. Native bacterial ASVs from gut and casts are those found only in these samples and not in soil. Native soil ASVs are those found only in soil samples.
ASV	Phylum	Class	Order	Family	Genus	Natives
ASV1700	WPS-2	unclassified	unclassified	unclassified	unclassified	soil
ASV2129	WPS-2	unclassified	unclassified	unclassified	unclassified	soil
ASV3905	WPS-2	unclassified	unclassified	unclassified	unclassified	soil
ASV2797	WPS-2	unclassified	unclassified	unclassified	unclassified	soil
ASV4464	WPS-2	unclassified	unclassified	unclassified	unclassified	soil
ASV3473	WPS-2	unclassified	unclassified	unclassified	unclassified	soil
ASV6300	BRC1	unclassified	unclassified	unclassified	unclassified	soil
ASV5321	Spirochaetes	Spirochaetia	Brevinematales	Brevinemataceae	Brevinema	soil
ASV5312	Proteobacteria	Gammaproteobacteria	Betaproteobacteriales	Burkholderiaceae	unclassified	soil
ASV854	Proteobacteria	Gammaproteobacteria	Betaproteobacteriales	Burkholderiaceae	unclassified	soil
ASV1697	Proteobacteria	Gammaproteobacteria	Betaproteobacteriales	Burkholderiaceae	unclassified	soil
ASV1214	Proteobacteria	Gammaproteobacteria	Betaproteobacteriales	Burkholderiaceae	Aquabacterium	soil
ASV1513	Proteobacteria	Gammaproteobacteria	Betaproteobacteriales	Burkholderiaceae	unclassified	soil
ASV3358	Proteobacteria	Gammaproteobacteria	Betaproteobacteriales	Burkholderiaceae	Noviherbaspirillum	soil
ASV3117	Proteobacteria	Gammaproteobacteria	Betaproteobacteriales	Burkholderiaceae	unclassified	soil
ASV1660	Proteobacteria	Gammaproteobacteria	Betaproteobacteriales	Burkholderiaceae	unclassified	soil
ASV1976	Proteobacteria	Gammaproteobacteria	Betaproteobacteriales	Burkholderiaceae	Noviherbaspirillum	soil
ASV4277	Proteobacteria	Gammaproteobacteria	Betaproteobacteriales	Burkholderiaceae	unclassified	soil
ASV5977	Proteobacteria	Gammaproteobacteria	Betaproteobacteriales	A21b	unclassified	soil
ASV2895	Proteobacteria	Gammaproteobacteria	Betaproteobacteriales	A21b	unclassified	soil
ASV4903	Proteobacteria	Gammaproteobacteria	Betaproteobacteriales	A21b	unclassified	soil
ASV672	Proteobacteria	Gammaproteobacteria	Betaproteobacteriales	A21b	unclassified	soil
ASV2263	Proteobacteria	Gammaproteobacteria	Betaproteobacteriales	A21b	unclassified	soil
ASV3103	Proteobacteria	Gammaproteobacteria	Betaproteobacteriales	A21b	unclassified	soil
ASV5107	Proteobacteria	Gammaproteobacteria	Betaproteobacteriales	unclassified	unclassified	soil
ASV4288	Proteobacteria	Gammaproteobacteria	Betaproteobacteriales	SC-I-84	unclassified	soil
ASV4908	Proteobacteria	Gammaproteobacteria	Betaproteobacteriales	SC-I-84	unclassified	soil
ASV3611	Proteobacteria	Gammaproteobacteria	Betaproteobacteriales	Nitrosomonadaceae	IS-44	soil
ASV1425	Proteobacteria	Gammaproteobacteria	Betaproteobacteriales	Nitrosomonadaceae	MND1	soil
ASV4286	Proteobacteria	Gammaproteobacteria	Betaproteobacteriales	unclassified	unclassified	soil
ASV4927	Proteobacteria	Gammaproteobacteria	Betaproteobacteriales	unclassified	unclassified	soil
ASV1371	Proteobacteria	Gammaproteobacteria	Betaproteobacteriales	Burkholderiaceae	Massilia	soil
ASV4468	Proteobacteria	Gammaproteobacteria	Betaproteobacteriales	Burkholderiaceae	Duganella	soil
ASV5161	Proteobacteria	Gammaproteobacteria	Betaproteobacteriales	Rhodocyclaceae	unclassified	soil
ASV5624	Proteobacteria	Gammaproteobacteria	Betaproteobacteriales	Nitrosomonadaceae	unclassified	soil
ASV3230	Proteobacteria	Gammaproteobacteria	Betaproteobacteriales	Nitrosomonadaceae	Ellin6067	soil
ASV1340	Proteobacteria	Gammaproteobacteria	Betaproteobacteriales	Nitrosomonadaceae	Ellin6067	soil
ASV1864	Proteobacteria	Gammaproteobacteria	Betaproteobacteriales	Nitrosomonadaceae	Ellin6067	soil
ASV4290	Proteobacteria	Alphaproteobacteria	Rickettsiales	Rickettsiaceae	unclassified	soil
ASV6409	Proteobacteria	unclassified	unclassified	unclassified	unclassified	soil
ASV2403	Proteobacteria	Alphaproteobacteria	Elsterales	URHD0088	unclassified	soil
ASV3359	Proteobacteria	Alphaproteobacteria	Elsterales	URHD0088	unclassified	soil
ASV2200	Proteobacteria	Alphaproteobacteria	Elsterales	URHD0088	unclassified	soil
ASV2538	Proteobacteria	Alphaproteobacteria	Elsterales	URHD0088	unclassified	soil
ASV5813	Proteobacteria	Alphaproteobacteria	Elsterales	unclassified	unclassified	soil
ASV1517	Proteobacteria	Alphaproteobacteria	Elsterales	unclassified	unclassified	soil
ASV2713	Proteobacteria	Alphaproteobacteria	Elsterales	unclassified	unclassified	soil
ASV5318	Proteobacteria	Alphaproteobacteria	Elsterales	unclassified	unclassified	soil
ASV4251	Proteobacteria	Alphaproteobacteria	Elsterales	unclassified	unclassified	soil
ASV1614	Proteobacteria	Alphaproteobacteria	Elsterales	unclassified	unclassified	soil
ASV5600	Proteobacteria	Alphaproteobacteria	Elsterales	unclassified	unclassified	soil
ASV3622	Proteobacteria	Alphaproteobacteria	Elsterales	unclassified	unclassified	soil
ASV5767	Proteobacteria	Alphaproteobacteria	Elsterales	unclassified	unclassified	soil
ASV5787	Proteobacteria	Alphaproteobacteria	unclassified	unclassified	unclassified	soil
ASV5980	Proteobacteria	Alphaproteobacteria	Elsterales	unclassified	unclassified	soil
ASV5376	Proteobacteria	Alphaproteobacteria	Rhodospirillales	unclassified	unclassified	soil
ASV6227	Proteobacteria	unclassified	unclassified	unclassified	unclassified	soil
ASV6182	Proteobacteria	Deltaproteobacteria	Bdellovibrionales	Bdellovibrionaceae	Bdellovibrio	soil
ASV6353	Proteobacteria	Deltaproteobacteria	unclassified	unclassified	unclassified	soil
ASV4911	Proteobacteria	Deltaproteobacteria	Bdellovibrionales	Bdellovibrionaceae	Bdellovibrio	soil
ASV4249	Proteobacteria	unclassified	unclassified	unclassified	unclassified	soil
ASV4924	Proteobacteria	Deltaproteobacteria	Myxococcales	Polyangiaceae	Pajaroellobacter	soil
ASV5979	Proteobacteria	Deltaproteobacteria	Myxococcales	unclassified	unclassified	soil
ASV5578	Proteobacteria	Alphaproteobacteria	Reyranellales	Reyranellaceae	Reyranella	soil
ASV5127	Proteobacteria	Alphaproteobacteria	Reyranellales	Reyranellaceae	Reyranella	soil
ASV3345	Proteobacteria	Alphaproteobacteria	Reyranellales	Reyranellaceae	Reyranella	soil
ASV712	Proteobacteria	Alphaproteobacteria	Reyranellales	Reyranellaceae	Reyranella	soil
ASV4892	Proteobacteria	Alphaproteobacteria	Rhodospirillales	Rhodospirillaceae	unclassified	soil
ASV4088	Proteobacteria	Alphaproteobacteria	Rhodospirillales	Rhodospirillaceae	unclassified	soil
ASV3609	Proteobacteria	Alphaproteobacteria	Rhodospirillales	Rhodospirillaceae	unclassified	soil
ASV4672	Proteobacteria	Alphaproteobacteria	Rhodospirillales	Rhodospirillaceae	unclassified	soil
ASV5764	Proteobacteria	Alphaproteobacteria	Rickettsiales	SM2D12	unclassified	soil
ASV3238	Proteobacteria	Alphaproteobacteria	Rickettsiales	SM2D12	unclassified	soil
ASV4655	Proteobacteria	Alphaproteobacteria	Rickettsiales	SM2D12	unclassified	soil
ASV4474	Proteobacteria	Alphaproteobacteria	Rickettsiales	SM2D12	unclassified	soil
ASV4696	Proteobacteria	Alphaproteobacteria	Rickettsiales	SM2D12	unclassified	soil
ASV3237	Proteobacteria	Alphaproteobacteria	Rickettsiales	SM2D12	unclassified	soil
ASV5310	Proteobacteria	Alphaproteobacteria	Rickettsiales	SM2D12	unclassified	soil
ASV5149	Proteobacteria	Alphaproteobacteria	Rickettsiales	SM2D12	unclassified	soil
ASV5334	Proteobacteria	Alphaproteobacteria	Rickettsiales	SM2D12	unclassified	soil
ASV6204	Proteobacteria	Alphaproteobacteria	Rickettsiales	SM2D12	unclassified	soil
ASV6163	Proteobacteria	Alphaproteobacteria	Rickettsiales	SM2D12	unclassified	soil
ASV3361	Proteobacteria	Alphaproteobacteria	Caulobacterales	Caulobacteraceae	unclassified	soil
ASV2614	Proteobacteria	Alphaproteobacteria	Caulobacterales	Caulobacteraceae	unclassified	soil
ASV4492	Proteobacteria	Alphaproteobacteria	Caulobacterales	Caulobacteraceae	unclassified	soil
ASV4063	Proteobacteria	Alphaproteobacteria	Caulobacterales	Caulobacteraceae	unclassified	soil
ASV2399	Proteobacteria	Alphaproteobacteria	Caulobacterales	Caulobacteraceae	Phenylobacterium	soil
ASV5116	Proteobacteria	Alphaproteobacteria	Caulobacterales	Caulobacteraceae	Phenylobacterium	soil
ASV6033	Proteobacteria	Alphaproteobacteria	Caulobacterales	Caulobacteraceae	Phenylobacterium	soil
ASV2264	Proteobacteria	Alphaproteobacteria	Caulobacterales	Caulobacteraceae	Phenylobacterium	soil
ASV4902	Proteobacteria	Alphaproteobacteria	Caulobacterales	Caulobacteraceae	Phenylobacterium	soil
ASV3108	Proteobacteria	Alphaproteobacteria	Rhizobiales	Beijerinckiaceae	1174-901-12	soil
ASV1868	Proteobacteria	Alphaproteobacteria	Rhizobiales	Beijerinckiaceae	Roseiarcus	soil
ASV4068	Proteobacteria	Alphaproteobacteria	Rhizobiales	Beijerinckiaceae	unclassified	soil
ASV6450	Proteobacteria	Alphaproteobacteria	Rhizobiales	Beijerinckiaceae	unclassified	soil
ASV3362	Proteobacteria	Alphaproteobacteria	Rhizobiales	Beijerinckiaceae	unclassified	soil
ASV1252	Proteobacteria	Alphaproteobacteria	Rhizobiales	Beijerinckiaceae	1174-901-12	soil
ASV2400	Proteobacteria	Alphaproteobacteria	Rhizobiales	Xanthobacteraceae	unclassified	soil
ASV2889	Proteobacteria	Alphaproteobacteria	Rhizobiales	Xanthobacteraceae	Rhodoplanes	soil
ASV3480	Proteobacteria	Alphaproteobacteria	Rhizobiales	Xanthobacteraceae	Rhodoplanes	soil
ASV2536	Proteobacteria	Alphaproteobacteria	Rhizobiales	Xanthobacteraceae	unclassified	soil
ASV1701	Proteobacteria	Alphaproteobacteria	Rhizobiales	unclassified	unclassified	soil
ASV3493	Proteobacteria	Alphaproteobacteria	Rhizobiales	Xanthobacteraceae	Pseudolabrys	soil
ASV4897	Proteobacteria	Alphaproteobacteria	Rhizobiales	Xanthobacteraceae	unclassified	soil
ASV3236	Proteobacteria	Alphaproteobacteria	Rhizobiales	Xanthobacteraceae	unclassified	soil
ASV5384	Proteobacteria	Alphaproteobacteria	Rhizobiales	Beijerinckiaceae	Methylobacterium	soil
ASV5762	Proteobacteria	Alphaproteobacteria	Parvibaculales	Parvibaculaceae	unclassified	soil
ASV6241	Proteobacteria	Alphaproteobacteria	Rhizobiales	Rhodomicrobiaceae	Rhodomicrobium	soil
ASV1824	Proteobacteria	Alphaproteobacteria	Rhizobiales	Labraceae	Labrys	soil
ASV3339	Proteobacteria	Alphaproteobacteria	Rhizobiales	Labraceae	Labrys	soil
ASV3778	Proteobacteria	Alphaproteobacteria	Rhizobiales	Rhizobiales_Incertae_Sedis	Bauldia	soil
ASV5802	Proteobacteria	Alphaproteobacteria	Rhizobiales	Rhizobiales_Incertae_Sedis	Nordella	soil
ASV1512	Proteobacteria	Alphaproteobacteria	Rhizobiales	Devosiaceae	unclassified	soil
ASV5969	Proteobacteria	Alphaproteobacteria	Rhizobiales	Devosiaceae	unclassified	soil
ASV4090	Proteobacteria	Alphaproteobacteria	Rhizobiales	Devosiaceae	unclassified	soil
ASV1282	Proteobacteria	Alphaproteobacteria	Sphingomonadales	Sphingomonadaceae	Blastomonas	soil
ASV1911	Proteobacteria	Alphaproteobacteria	Sphingomonadales	Sphingomonadaceae	Novosphingobium	soil
ASV3470	Proteobacteria	Alphaproteobacteria	Sphingomonadales	Sphingomonadaceae	unclassified	soil
ASV5330	Proteobacteria	Alphaproteobacteria	Sphingomonadales	Sphingomonadaceae	Novosphingobium	soil
ASV810	Proteobacteria	Alphaproteobacteria	Sphingomonadales	Sphingomonadaceae	Sphingomonas	soil
ASV1656	Proteobacteria	Alphaproteobacteria	Sphingomonadales	Sphingomonadaceae	Sphingomonas	soil
ASV2028	Proteobacteria	Alphaproteobacteria	Sphingomonadales	Sphingomonadaceae	Sphingomonas	soil
ASV3613	Proteobacteria	Alphaproteobacteria	Sphingomonadales	Sphingomonadaceae	unclassified	soil
ASV938	Proteobacteria	Alphaproteobacteria	Sphingomonadales	Sphingomonadaceae	Sphingomonas	soil
ASV3239	Proteobacteria	Alphaproteobacteria	Sphingomonadales	Sphingomonadaceae	Sphingomonas	soil
ASV5605	Proteobacteria	Alphaproteobacteria	Sphingomonadales	Sphingomonadaceae	Sphingomonas	soil
ASV4488	Proteobacteria	Alphaproteobacteria	Sphingomonadales	Sphingomonadaceae	unclassified	soil
ASV4670	Proteobacteria	Alphaproteobacteria	Rhodospirillales	Magnetospirillaceae	unclassified	soil
ASV1586	Proteobacteria	Alphaproteobacteria	Micropepsales	Micropepsaceae	unclassified	soil
ASV628	Proteobacteria	Alphaproteobacteria	Micropepsales	Micropepsaceae	unclassified	soil
ASV4054	Proteobacteria	Alphaproteobacteria	Micropepsales	Micropepsaceae	unclassified	soil
ASV5354	Proteobacteria	Alphaproteobacteria	Micropepsales	Micropepsaceae	unclassified	soil
ASV3890	Proteobacteria	Alphaproteobacteria	Micropepsales	Micropepsaceae	unclassified	soil
ASV5599	Proteobacteria	Alphaproteobacteria	Micropepsales	Micropepsaceae	unclassified	soil
ASV4271	Proteobacteria	Alphaproteobacteria	Micropepsales	Micropepsaceae	unclassified	soil
ASV721	Proteobacteria	Alphaproteobacteria	Micropepsales	Micropepsaceae	unclassified	soil
ASV1395	Proteobacteria	Alphaproteobacteria	Rhizobiales	KF-JG30-B3	unclassified	soil
ASV6010	Proteobacteria	Alphaproteobacteria	unclassified	unclassified	unclassified	soil
ASV5550	Proteobacteria	Alphaproteobacteria	unclassified	unclassified	unclassified	soil
ASV1973	Proteobacteria	Alphaproteobacteria	unclassified	unclassified	unclassified	soil
ASV5606	Proteobacteria	Alphaproteobacteria	Elsterales	unclassified	unclassified	soil
ASV5340	Proteobacteria	Alphaproteobacteria	Azospirillales	Inquilinaceae	Inquilinus	soil
ASV6161	Proteobacteria	Alphaproteobacteria	Acetobacterales	Acetobacteraceae	unclassified	soil
ASV2716	Proteobacteria	Alphaproteobacteria	Acetobacterales	Acetobacteraceae	Acidicaldus	soil
ASV2891	Proteobacteria	Alphaproteobacteria	Acetobacterales	Acetobacteraceae	unclassified	soil
ASV4472	Proteobacteria	Alphaproteobacteria	Acetobacterales	Acetobacteraceae	unclassified	soil
ASV3002	Proteobacteria	Alphaproteobacteria	Acetobacterales	Acetobacteraceae	Endobacter	soil
ASV5381	Proteobacteria	Alphaproteobacteria	Acetobacterales	Acetobacteraceae	Acidiphilium	soil
ASV1168	Proteobacteria	Alphaproteobacteria	Acetobacterales	Acetobacteraceae	unclassified	soil
ASV3621	Proteobacteria	Alphaproteobacteria	Acetobacterales	Acetobacteraceae	unclassified	soil
ASV5329	Proteobacteria	Alphaproteobacteria	Acetobacterales	Acetobacteraceae	unclassified	soil
ASV4069	Proteobacteria	Alphaproteobacteria	Acetobacterales	Acetobacteraceae	Endobacter	soil
ASV2793	Proteobacteria	Alphaproteobacteria	Acetobacterales	Acetobacteraceae	Endobacter	soil
ASV2795	Proteobacteria	Alphaproteobacteria	Acetobacterales	Acetobacteraceae	unclassified	soil
ASV3629	Proteobacteria	Alphaproteobacteria	Acetobacterales	Acetobacteraceae	unclassified	soil
ASV4885	Proteobacteria	Alphaproteobacteria	Acetobacterales	Acetobacteraceae	unclassified	soil
ASV1664	Proteobacteria	Alphaproteobacteria	Acetobacterales	Acetobacteraceae	unclassified	soil
ASV3484	Proteobacteria	Alphaproteobacteria	Acetobacterales	Acetobacteraceae	unclassified	soil
ASV5305	Proteobacteria	Alphaproteobacteria	Acetobacterales	Acetobacteraceae	unclassified	soil
ASV5577	Proteobacteria	Alphaproteobacteria	Acetobacterales	Acetobacteraceae	Rhodovastum	soil
ASV4923	Proteobacteria	Alphaproteobacteria	Acetobacterales	Acetobacteraceae	unclassified	soil
ASV6165	Proteobacteria	Alphaproteobacteria	Paracaedibacterales	Paracaedibacteraceae	Candidatus_Paracaedibacter	soil
ASV5603	Proteobacteria	Alphaproteobacteria	unclassified	unclassified	unclassified	soil
ASV6037	Proteobacteria	Alphaproteobacteria	Holosporales	Holosporaceae	unclassified	soil
ASV6298	Proteobacteria	Alphaproteobacteria	unclassified	unclassified	unclassified	soil
ASV5763	Proteobacteria	Alphaproteobacteria	Rhodospirillales	unclassified	unclassified	soil
ASV3107	Proteobacteria	Alphaproteobacteria	Rhodospirillales	unclassified	unclassified	soil
ASV5583	Proteobacteria	Alphaproteobacteria	Rhodospirillales	unclassified	unclassified	soil
ASV5994	Proteobacteria	Alphaproteobacteria	unclassified	unclassified	unclassified	soil
ASV5612	Proteobacteria	Alphaproteobacteria	unclassified	unclassified	unclassified	soil
ASV4491	Proteobacteria	Deltaproteobacteria	Bdellovibrionales	Bdellovibrionaceae	Bdellovibrio	soil
ASV6003	Proteobacteria	Deltaproteobacteria	Bdellovibrionales	Bdellovibrionaceae	Bdellovibrio	soil
ASV5358	Proteobacteria	Deltaproteobacteria	Bdellovibrionales	Bdellovibrionaceae	Bdellovibrio	soil
ASV5324	Proteobacteria	Deltaproteobacteria	Bdellovibrionales	Bdellovibrionaceae	Bdellovibrio	soil
ASV6035	Proteobacteria	Deltaproteobacteria	Bdellovibrionales	Bdellovibrionaceae	Bdellovibrio	soil
ASV4465	Proteobacteria	Deltaproteobacteria	Bdellovibrionales	Bdellovibrionaceae	Bdellovibrio	soil
ASV4882	Proteobacteria	Deltaproteobacteria	Bdellovibrionales	Bdellovibrionaceae	Bdellovibrio	soil
ASV5786	Proteobacteria	Deltaproteobacteria	Bdellovibrionales	Bdellovibrionaceae	Bdellovibrio	soil
ASV5798	Proteobacteria	Deltaproteobacteria	Bdellovibrionales	Bdellovibrionaceae	Bdellovibrio	soil
ASV6181	Proteobacteria	Deltaproteobacteria	Bdellovibrionales	Bdellovibrionaceae	Bdellovibrio	soil
ASV6223	Proteobacteria	Deltaproteobacteria	Bdellovibrionales	Bdellovibrionaceae	Bdellovibrio	soil
ASV4452	Proteobacteria	Deltaproteobacteria	Bdellovibrionales	Bdellovibrionaceae	Bdellovibrio	soil
ASV5587	Proteobacteria	Deltaproteobacteria	Bdellovibrionales	Bdellovibrionaceae	Bdellovibrio	soil
ASV6023	Proteobacteria	Deltaproteobacteria	Bdellovibrionales	Bdellovibrionaceae	Bdellovibrio	soil
ASV6014	Proteobacteria	Deltaproteobacteria	Bdellovibrionales	Bdellovibrionaceae	Bdellovibrio	soil
ASV4676	Proteobacteria	Deltaproteobacteria	Bdellovibrionales	Bdellovibrionaceae	Bdellovibrio	soil
ASV3758	Proteobacteria	Deltaproteobacteria	Bdellovibrionales	Bdellovibrionaceae	Bdellovibrio	soil
ASV5380	Proteobacteria	Deltaproteobacteria	Bdellovibrionales	Bdellovibrionaceae	Bdellovibrio	soil
ASV4904	Proteobacteria	Deltaproteobacteria	Bdellovibrionales	Bdellovibrionaceae	Bdellovibrio	soil
ASV5326	Proteobacteria	Deltaproteobacteria	Bdellovibrionales	Bdellovibrionaceae	Bdellovibrio	soil
ASV4265	Proteobacteria	Deltaproteobacteria	Bdellovibrionales	Bdellovibrionaceae	Bdellovibrio	soil
ASV4456	Proteobacteria	Deltaproteobacteria	Bdellovibrionales	Bdellovibrionaceae	Bdellovibrio	soil
ASV4060	Proteobacteria	Deltaproteobacteria	Bdellovibrionales	Bdellovibrionaceae	Bdellovibrio	soil
ASV5328	Proteobacteria	Deltaproteobacteria	Bdellovibrionales	Bdellovibrionaceae	Bdellovibrio	soil
ASV6313	Proteobacteria	Deltaproteobacteria	Bdellovibrionales	Bdellovibrionaceae	Bdellovibrio	soil
ASV5565	Proteobacteria	Deltaproteobacteria	Oligoflexales	0319-6G20	unclassified	soil
ASV6350	Planctomycetes	vadinHA49	unclassified	unclassified	unclassified	soil
ASV1055	Planctomycetes	vadinHA49	unclassified	unclassified	unclassified	soil
ASV4261	Planctomycetes	vadinHA49	unclassified	unclassified	unclassified	soil
ASV5812	Planctomycetes	vadinHA49	unclassified	unclassified	unclassified	soil
ASV5777	Planctomycetes	vadinHA49	unclassified	unclassified	unclassified	soil
ASV5620	Planctomycetes	vadinHA49	unclassified	unclassified	unclassified	soil
ASV3605	Planctomycetes	vadinHA49	unclassified	unclassified	unclassified	soil
ASV2330	Planctomycetes	vadinHA49	unclassified	unclassified	unclassified	soil
ASV4914	Planctomycetes	vadinHA49	unclassified	unclassified	unclassified	soil
ASV6430	Chlamydiae	Chlamydiae	Chlamydiales	cvE6	unclassified	soil
ASV6412	Chlamydiae	Chlamydiae	Chlamydiales	unclassified	unclassified	soil
ASV6006	Chlamydiae	Chlamydiae	Chlamydiales	Parachlamydiaceae	unclassified	soil
ASV6396	Chlamydiae	Chlamydiae	Chlamydiales	Parachlamydiaceae	Candidatus_Protochlamydia	soil
ASV6314	Chlamydiae	Chlamydiae	Chlamydiales	unclassified	unclassified	soil
ASV6344	Chlamydiae	Chlamydiae	Chlamydiales	Parachlamydiaceae	unclassified	soil
ASV5988	Chlamydiae	Chlamydiae	Chlamydiales	unclassified	unclassified	soil
ASV4873	Bacteroidetes	Bacteroidia	Cytophagales	Hymenobacteraceae	Hymenobacter	soil
ASV5821	Bacteroidetes	Bacteroidia	Cytophagales	Hymenobacteraceae	Hymenobacter	soil
ASV4252	Bacteroidetes	Bacteroidia	Bacteroidales	Rikenellaceae	Alistipes	soil
ASV1394	Bacteroidetes	Bacteroidia	unclassified	unclassified	unclassified	soil
ASV5774	Bacteroidetes	Bacteroidia	Bacteroidales	Rikenellaceae	Anaerocella	soil
ASV5131	Bacteroidetes	Bacteroidia	Sphingobacteriales	Sphingobacteriaceae	Mucilaginibacter	soil
ASV3765	Bacteroidetes	Bacteroidia	Sphingobacteriales	Sphingobacteriaceae	Mucilaginibacter	soil
ASV4687	Bacteroidetes	Bacteroidia	Sphingobacteriales	Sphingobacteriaceae	Mucilaginibacter	soil
ASV3607	Bacteroidetes	Bacteroidia	Sphingobacteriales	Sphingobacteriaceae	Mucilaginibacter	soil
ASV3347	Bacteroidetes	Bacteroidia	Sphingobacteriales	Sphingobacteriaceae	Mucilaginibacter	soil
ASV2396	Bacteroidetes	Bacteroidia	Sphingobacteriales	Sphingobacteriaceae	Mucilaginibacter	soil
ASV3343	Bacteroidetes	Bacteroidia	Sphingobacteriales	Sphingobacteriaceae	Mucilaginibacter	soil
ASV1776	Bacteroidetes	Bacteroidia	Sphingobacteriales	Sphingobacteriaceae	Mucilaginibacter	soil
ASV1105	Bacteroidetes	Bacteroidia	Sphingobacteriales	Sphingobacteriaceae	Mucilaginibacter	soil
ASV451	Bacteroidetes	Bacteroidia	Sphingobacteriales	Sphingobacteriaceae	Mucilaginibacter	soil
ASV5359	Bacteroidetes	Bacteroidia	Sphingobacteriales	Sphingobacteriaceae	Pedobacter	soil
ASV1585	Bacteroidetes	Bacteroidia	Sphingobacteriales	Sphingobacteriaceae	Mucilaginibacter	soil
ASV3756	Bacteroidetes	Bacteroidia	Sphingobacteriales	Sphingobacteriaceae	Mucilaginibacter	soil
ASV3228	Bacteroidetes	Bacteroidia	Sphingobacteriales	Sphingobacteriaceae	Mucilaginibacter	soil
ASV4660	Bacteroidetes	Bacteroidia	Sphingobacteriales	Sphingobacteriaceae	Mucilaginibacter	soil
ASV4684	Bacteroidetes	Bacteroidia	Sphingobacteriales	Sphingobacteriaceae	Pedobacter	soil
ASV811	Bacteroidetes	Bacteroidia	Sphingobacteriales	Sphingobacteriaceae	Pedobacter	soil
ASV1775	Bacteroidetes	Bacteroidia	Sphingobacteriales	Sphingobacteriaceae	Mucilaginibacter	soil
ASV3475	Bacteroidetes	Bacteroidia	Sphingobacteriales	Sphingobacteriaceae	Mucilaginibacter	soil
ASV4076	Bacteroidetes	Bacteroidia	Chitinophagales	unclassified	unclassified	soil
ASV4499	Bacteroidetes	Bacteroidia	Chitinophagales	Chitinophagaceae	unclassified	soil
ASV773	Bacteroidetes	Bacteroidia	Chitinophagales	Chitinophagaceae	unclassified	soil
ASV3911	Bacteroidetes	Bacteroidia	Chitinophagales	Chitinophagaceae	unclassified	soil
ASV6167	Bacteroidetes	Bacteroidia	Chitinophagales	Chitinophagaceae	unclassified	soil
ASV3615	Bacteroidetes	Bacteroidia	Chitinophagales	Chitinophagaceae	unclassified	soil
ASV3894	Bacteroidetes	Bacteroidia	Chitinophagales	Chitinophagaceae	unclassified	soil
ASV4479	Bacteroidetes	Bacteroidia	Chitinophagales	Chitinophagaceae	unclassified	soil
ASV6050	Bacteroidetes	Bacteroidia	unclassified	unclassified	unclassified	soil
ASV6031	Bacteroidetes	Bacteroidia	Chitinophagales	unclassified	unclassified	soil
ASV3761	Bacteroidetes	Bacteroidia	unclassified	unclassified	unclassified	soil
ASV6021	Bacteroidetes	Bacteroidia	unclassified	unclassified	unclassified	soil
ASV3479	Bacteroidetes	Bacteroidia	Chitinophagales	Chitinophagaceae	Flavitalea	soil
ASV4906	Bacteroidetes	Bacteroidia	Chitinophagales	Chitinophagaceae	unclassified	soil
ASV4257	Bacteroidetes	Bacteroidia	Chitinophagales	Chitinophagaceae	unclassified	soil
ASV4254	Bacteroidetes	Bacteroidia	Chitinophagales	Chitinophagaceae	Segetibacter	soil
ASV2799	Bacteroidetes	Bacteroidia	Chitinophagales	Chitinophagaceae	Ferruginibacter	soil
ASV3469	Bacteroidetes	Bacteroidia	Chitinophagales	Chitinophagaceae	Ferruginibacter	soil
ASV4278	Bacteroidetes	Bacteroidia	Chitinophagales	Chitinophagaceae	Ferruginibacter	soil
ASV4921	Bacteroidetes	Bacteroidia	Chitinophagales	Chitinophagaceae	Ferruginibacter	soil
ASV4683	Bacteroidetes	Bacteroidia	Chitinophagales	Chitinophagaceae	unclassified	soil
ASV5984	Bacteroidetes	Bacteroidia	Chitinophagales	Chitinophagaceae	unclassified	soil
ASV4875	Bacteroidetes	Bacteroidia	Chitinophagales	Chitinophagaceae	unclassified	soil
ASV5086	Bacteroidetes	Bacteroidia	Chitinophagales	Chitinophagaceae	Terrimonas	soil
ASV772	Bacteroidetes	Bacteroidia	Chitinophagales	Chitinophagaceae	Flavisolibacter	soil
ASV2999	Bacteroidetes	Bacteroidia	Chitinophagales	Chitinophagaceae	unclassified	soil
ASV1778	Bacteroidetes	Bacteroidia	Chitinophagales	Chitinophagaceae	unclassified	soil
ASV1249	Bacteroidetes	Bacteroidia	Chitinophagales	Chitinophagaceae	unclassified	soil
ASV1514	Bacteroidetes	Bacteroidia	Chitinophagales	Chitinophagaceae	Niastella	soil
ASV4667	Bacteroidetes	Bacteroidia	Chitinophagales	Chitinophagaceae	unclassified	soil
ASV5133	Bacteroidetes	Bacteroidia	Chitinophagales	37-13	unclassified	soil
ASV4681	Bacteroidetes	Bacteroidia	Chitinophagales	37-13	unclassified	soil
ASV4283	Bacteroidetes	Bacteroidia	Chitinophagales	37-13	unclassified	soil
ASV6046	Bacteroidetes	Bacteroidia	Chitinophagales	37-13	unclassified	soil
ASV4886	Bacteroidetes	Bacteroidia	Chitinophagales	37-13	unclassified	soil
ASV5590	Bacteroidetes	Bacteroidia	Sphingobacteriales	AKYH767	unclassified	soil
ASV4274	Bacteroidetes	Bacteroidia	Sphingobacteriales	AKYH767	unclassified	soil
ASV3348	Bacteroidetes	Bacteroidia	Sphingobacteriales	AKYH767	unclassified	soil
ASV4466	Bacteroidetes	Bacteroidia	Flavobacteriales	Flavobacteriaceae	Flavobacterium	soil
ASV4055	Bacteroidetes	Bacteroidia	Flavobacteriales	Flavobacteriaceae	Flavobacterium	soil
ASV707	Bacteroidetes	Bacteroidia	Flavobacteriales	Weeksellaceae	Chryseobacterium	soil
ASV4887	Bacteroidetes	Bacteroidia	Flavobacteriales	Weeksellaceae	Chryseobacterium	soil
ASV5973	Bacteroidetes	Bacteroidia	Flavobacteriales	Weeksellaceae	Chryseobacterium	soil
ASV6337	Bacteroidetes	Bacteroidia	unclassified	unclassified	unclassified	soil
ASV6235	Bacteroidetes	Bacteroidia	Sphingobacteriales	unclassified	unclassified	soil
ASV2332	Bacteroidetes	Bacteroidia	Sphingobacteriales	AKYH767	unclassified	soil
ASV5378	Bacteroidetes	Bacteroidia	Sphingobacteriales	AKYH767	unclassified	soil
ASV2395	Bacteroidetes	Bacteroidia	Sphingobacteriales	unclassified	unclassified	soil
ASV4458	Bacteroidetes	Bacteroidia	Sphingobacteriales	unclassified	unclassified	soil
ASV5584	Bacteroidetes	Bacteroidia	Sphingobacteriales	unclassified	unclassified	soil
ASV5619	Bacteroidetes	Bacteroidia	Sphingobacteriales	unclassified	unclassified	soil
ASV1908	Bacteroidetes	Bacteroidia	Sphingobacteriales	AKYH767	unclassified	soil
ASV4493	Bacteroidetes	Bacteroidia	Sphingobacteriales	AKYH767	unclassified	soil
ASV5115	Bacteroidetes	Bacteroidia	Sphingobacteriales	unclassified	unclassified	soil
ASV1370	Bacteroidetes	Bacteroidia	Sphingobacteriales	env.OPS_17	unclassified	soil
ASV3776	Bacteroidetes	Bacteroidia	Sphingobacteriales	env.OPS_17	unclassified	soil
ASV3893	Bacteroidetes	Bacteroidia	Sphingobacteriales	env.OPS_17	unclassified	soil
ASV1313	Bacteroidetes	Bacteroidia	Sphingobacteriales	env.OPS_17	unclassified	soil
ASV4890	Bacteroidetes	Bacteroidia	Sphingobacteriales	env.OPS_17	unclassified	soil
ASV2623	Bacteroidetes	Bacteroidia	Sphingobacteriales	env.OPS_17	unclassified	soil
ASV3356	Bacteroidetes	Bacteroidia	Sphingobacteriales	env.OPS_17	unclassified	soil
ASV3889	Bacteroidetes	Bacteroidia	Sphingobacteriales	env.OPS_17	unclassified	soil
ASV531	Bacteroidetes	Bacteroidia	Sphingobacteriales	env.OPS_17	unclassified	soil
ASV4056	Bacteroidetes	Bacteroidia	Sphingobacteriales	env.OPS_17	unclassified	soil
ASV2392	Bacteroidetes	Bacteroidia	Sphingobacteriales	env.OPS_17	unclassified	soil
ASV5317	Bacteroidetes	Bacteroidia	Sphingobacteriales	env.OPS_17	unclassified	soil
ASV868	Bacteroidetes	Bacteroidia	Sphingobacteriales	env.OPS_17	unclassified	soil
ASV3750	Bacteroidetes	Bacteroidia	Sphingobacteriales	env.OPS_17	unclassified	soil
ASV5155	Bacteroidetes	Bacteroidia	Sphingobacteriales	env.OPS_17	unclassified	soil
ASV4496	Bacteroidetes	Bacteroidia	Sphingobacteriales	env.OPS_17	unclassified	soil
ASV2127	Bacteroidetes	Bacteroidia	Sphingobacteriales	env.OPS_17	unclassified	soil
ASV2072	Bacteroidetes	Bacteroidia	Sphingobacteriales	env.OPS_17	unclassified	soil
ASV5146	Bacteroidetes	Bacteroidia	Sphingobacteriales	env.OPS_17	unclassified	soil
ASV5372	Bacteroidetes	Bacteroidia	Sphingobacteriales	env.OPS_17	unclassified	soil
ASV3763	Bacteroidetes	Bacteroidia	Sphingobacteriales	env.OPS_17	unclassified	soil
ASV5347	Bacteroidetes	Bacteroidia	Sphingobacteriales	env.OPS_17	unclassified	soil
ASV2886	Bacteroidetes	Bacteroidia	Sphingobacteriales	env.OPS_17	unclassified	soil
ASV5755	Bacteroidetes	Bacteroidia	Sphingobacteriales	env.OPS_17	unclassified	soil
ASV6171	Bacteroidetes	Bacteroidia	Sphingobacteriales	env.OPS_17	unclassified	soil
ASV5300	Bacteroidetes	Bacteroidia	Sphingobacteriales	env.OPS_17	unclassified	soil
ASV3771	Bacteroidetes	Bacteroidia	Sphingobacteriales	env.OPS_17	unclassified	soil
ASV1737	Bacteroidetes	Bacteroidia	Sphingobacteriales	env.OPS_17	unclassified	soil
ASV4920	Bacteroidetes	Bacteroidia	Sphingobacteriales	env.OPS_17	unclassified	soil
ASV5351	Bacteroidetes	Bacteroidia	Sphingobacteriales	env.OPS_17	unclassified	soil
ASV5978	Bacteroidetes	Bacteroidia	Sphingobacteriales	env.OPS_17	unclassified	soil
ASV4691	Bacteroidetes	Bacteroidia	Sphingobacteriales	env.OPS_17	unclassified	soil
ASV5367	Bacteroidetes	Bacteroidia	Sphingobacteriales	env.OPS_17	unclassified	soil
ASV5096	Bacteroidetes	Bacteroidia	Sphingobacteriales	env.OPS_17	unclassified	soil
ASV3610	Bacteroidetes	Bacteroidia	Sphingobacteriales	unclassified	unclassified	soil
ASV2890	Bacteroidetes	Bacteroidia	Sphingobacteriales	env.OPS_17	unclassified	soil
ASV2071	Bacteroidetes	Bacteroidia	Sphingobacteriales	env.OPS_17	unclassified	soil
ASV3906	Bacteroidetes	Bacteroidia	Sphingobacteriales	env.OPS_17	unclassified	soil
ASV6206	Bacteroidetes	Bacteroidia	Sphingobacteriales	unclassified	unclassified	soil
ASV4467	Bacteroidetes	Bacteroidia	Sphingobacteriales	unclassified	unclassified	soil
ASV1184	Bacteroidetes	Bacteroidia	Sphingobacteriales	KD3-93	unclassified	soil
ASV4285	Bacteroidetes	Bacteroidia	Sphingobacteriales	KD3-93	unclassified	soil
ASV6413	Bacteroidetes	Bacteroidia	unclassified	unclassified	unclassified	soil
ASV6188	Bacteroidetes	Bacteroidia	Bacteroidales	Tannerellaceae	Macellibacteroides	soil
ASV6312	Bacteroidetes	Bacteroidia	Cytophagales	Spirosomaceae	Spirosoma	soil
ASV6431	Bacteroidetes	Bacteroidia	Cytophagales	Spirosomaceae	Spirosoma	soil
ASV6321	Bacteroidetes	Bacteroidia	Cytophagales	Spirosomaceae	unclassified	soil
ASV5551	Bacteroidetes	Bacteroidia	Cytophagales	Microscillaceae	unclassified	soil
ASV5968	Bacteroidetes	Bacteroidia	unclassified	unclassified	unclassified	soil
ASV6028	Bacteroidetes	Bacteroidia	Cytophagales	unclassified	unclassified	soil
ASV5596	Bacteroidetes	Bacteroidia	Cytophagales	Cytophagaceae	Cytophaga	soil
ASV6234	Bacteroidetes	Bacteroidia	Cytophagales	Microscillaceae	unclassified	soil
ASV3888	Bacteroidetes	Bacteroidia	Cytophagales	Microscillaceae	unclassified	soil
ASV2621	Bacteroidetes	Bacteroidia	Cytophagales	Microscillaceae	unclassified	soil
ASV2464	Bacteroidetes	Cytophagia	Cytophagales	Cytophagaceae	Candidatus_Nephrothrix	soil
ASV3903	Bacteroidetes	Cytophagia	Cytophagales	Cytophagaceae	Candidatus_Nephrothrix	soil
ASV4880	Bacteroidetes	Bacteroidia	Cytophagales	Microscillaceae	unclassified	soil
ASV3898	Bacteroidetes	unclassified	unclassified	unclassified	unclassified	soil
ASV3900	Bacteroidetes	unclassified	unclassified	unclassified	unclassified	soil
ASV3360	Bacteroidetes	Bacteroidia	Cytophagales	Microscillaceae	OLB12	soil
ASV3354	Bacteroidetes	Bacteroidia	Cytophagales	Cytophagaceae	Cytophaga	soil
ASV5559	Bacteroidetes	Bacteroidia	Cytophagales	Cytophagaceae	Cytophaga	soil
ASV5784	Bacteroidetes	Bacteroidia	Cytophagales	Cytophagaceae	Cytophaga	soil
ASV3766	Bacteroidetes	Bacteroidia	Cytophagales	unclassified	unclassified	soil
ASV5361	Bacteroidetes	Bacteroidia	Cytophagales	Cytophagaceae	unclassified	soil
ASV4455	Bacteroidetes	Bacteroidia	Cytophagales	Cytophagaceae	unclassified	soil
ASV6196	Bacteroidetes	Bacteroidia	Cytophagales	Cytophagaceae	unclassified	soil
ASV5981	Bacteroidetes	Bacteroidia	Cytophagales	Cytophagaceae	Cytophaga	soil
ASV6347	Bacteroidetes	Bacteroidia	Cytophagales	Amoebophilaceae	Candidatus_Amoebophilus	soil
ASV1089	Bacteroidetes	Ignavibacteria	OPB56	unclassified	unclassified	soil
ASV5793	Bacteroidetes	Ignavibacteria	OPB56	unclassified	unclassified	soil
ASV1152	Bacteroidetes	Ignavibacteria	SJA-28	unclassified	unclassified	soil
ASV6203	Tenericutes	Mollicutes	Entomoplasmatales	Spiroplasmataceae	Spiroplasma	soil
ASV3601	Cyanobacteria	Oxyphotobacteria	Nostocales	Coleofasciculaceae	unclassified	soil
ASV6297	Cyanobacteria	Oxyphotobacteria	unclassified	unclassified	unclassified	soil
ASV3760	Cyanobacteria	unclassified	unclassified	unclassified	unclassified	soil
ASV1250	Cyanobacteria	Melainabacteria	Vampirovibrionales	unclassified	unclassified	soil
ASV4926	Cyanobacteria	Melainabacteria	Vampirovibrionales	unclassified	unclassified	soil
ASV3755	Cyanobacteria	Melainabacteria	Obscuribacterales	unclassified	unclassified	soil
ASV5135	Cyanobacteria	Melainabacteria	Obscuribacterales	unclassified	unclassified	soil
ASV5818	Cyanobacteria	Melainabacteria	Obscuribacterales	unclassified	unclassified	soil
ASV4898	Cyanobacteria	unclassified	unclassified	unclassified	unclassified	soil
ASV5824	Cyanobacteria	unclassified	unclassified	unclassified	unclassified	soil
ASV5580	Firmicutes	Negativicutes	Selenomonadales	Veillonellaceae	Megasphaera	soil
ASV6328	Cyanobacteria	Sericytochromatia	unclassified	unclassified	unclassified	soil
ASV6005	Cyanobacteria	Sericytochromatia	unclassified	unclassified	unclassified	soil
ASV5374	Cyanobacteria	Sericytochromatia	unclassified	unclassified	unclassified	soil
ASV5974	Cyanobacteria	Sericytochromatia	unclassified	unclassified	unclassified	soil
ASV4909	Firmicutes	Clostridia	Clostridiales	Ruminococcaceae	Ruminococcaceae_UCG-014	soil
ASV6147	FBP	unclassified	unclassified	unclassified	unclassified	soil
ASV6395	FBP	unclassified	unclassified	unclassified	unclassified	soil
ASV6338	FBP	unclassified	unclassified	unclassified	unclassified	soil
ASV6424	FBP	unclassified	unclassified	unclassified	unclassified	soil
ASV6036	FBP	unclassified	unclassified	unclassified	unclassified	soil
ASV6178	FBP	unclassified	unclassified	unclassified	unclassified	soil
ASV6351	FBP	unclassified	unclassified	unclassified	unclassified	soil
ASV3109	Fibrobacteres	Fibrobacteria	Fibrobacterales	Fibrobacteraceae	possible_genus_04	soil
ASV4896	Fibrobacteres	Fibrobacteria	Fibrobacterales	Fibrobacteraceae	possible_genus_04	soil
ASV2887	Fibrobacteres	Fibrobacteria	Fibrobacterales	Fibrobacteraceae	unclassified	soil
ASV4690	Fibrobacteres	Fibrobacteria	Fibrobacterales	Fibrobacteraceae	unclassified	soil
ASV6226	Fibrobacteres	Fibrobacteria	Fibrobacterales	Fibrobacteraceae	unclassified	soil
ASV4269	Dependentiae	Babeliae	Babeliales	UBA12409	unclassified	soil
ASV5827	Dependentiae	Babeliae	Babeliales	unclassified	unclassified	soil
ASV6016	Dependentiae	Babeliae	Babeliales	unclassified	unclassified	soil
ASV5567	Dependentiae	Babeliae	Babeliales	UBA12409	unclassified	soil
ASV6302	Dependentiae	Babeliae	Babeliales	Vermiphilaceae	unclassified	soil
ASV3915	Dependentiae	Babeliae	Babeliales	Vermiphilaceae	unclassified	soil
ASV6402	Dependentiae	Babeliae	Babeliales	unclassified	unclassified	soil
ASV6401	Patescibacteria	Microgenomatia	Candidatus_Amesbacteria	unclassified	unclassified	soil
ASV5996	Patescibacteria	Parcubacteria	unclassified	unclassified	unclassified	soil
ASV6415	Patescibacteria	Parcubacteria	Candidatus_Kaiserbacteria	unclassified	unclassified	soil
ASV6429	Patescibacteria	Parcubacteria	Candidatus_Adlerbacteria	unclassified	unclassified	soil
ASV6301	Patescibacteria	Parcubacteria	Candidatus_Zambryskibacteria	unclassified	unclassified	soil
ASV6416	Patescibacteria	Parcubacteria	unclassified	unclassified	unclassified	soil
ASV6352	Patescibacteria	Parcubacteria	unclassified	unclassified	unclassified	soil
ASV6414	Patescibacteria	Parcubacteria	unclassified	unclassified	unclassified	soil
ASV6323	Patescibacteria	Parcubacteria	unclassified	unclassified	unclassified	soil
ASV5989	Patescibacteria	Parcubacteria	unclassified	unclassified	unclassified	soil
ASV6417	Patescibacteria	Parcubacteria	unclassified	unclassified	unclassified	soil
ASV6305	Patescibacteria	Parcubacteria	unclassified	unclassified	unclassified	soil
ASV6392	Patescibacteria	Saccharimonadia	Saccharimonadales	unclassified	unclassified	soil
ASV6327	Patescibacteria	Saccharimonadia	Saccharimonadales	unclassified	unclassified	soil
ASV6393	Patescibacteria	Saccharimonadia	Saccharimonadales	unclassified	unclassified	soil
ASV6342	Patescibacteria	Saccharimonadia	Saccharimonadales	unclassified	unclassified	soil
ASV5153	Patescibacteria	Saccharimonadia	Saccharimonadales	unclassified	unclassified	soil
ASV5771	Patescibacteria	Saccharimonadia	Saccharimonadales	unclassified	unclassified	soil
ASV4922	Patescibacteria	Saccharimonadia	Saccharimonadales	unclassified	unclassified	soil
ASV6012	Patescibacteria	Saccharimonadia	Saccharimonadales	unclassified	unclassified	soil
ASV4494	Patescibacteria	Saccharimonadia	Saccharimonadales	unclassified	unclassified	soil
ASV6322	Patescibacteria	Gracilibacteria	Candidatus_Peribacteria	unclassified	unclassified	soil
ASV6399	Patescibacteria	Gracilibacteria	Candidatus_Peribacteria	unclassified	unclassified	soil
ASV6408	Patescibacteria	Gracilibacteria	Candidatus_Peribacteria	unclassified	unclassified	soil
ASV6411	Proteobacteria	unclassified	unclassified	unclassified	unclassified	soil
ASV5829	Patescibacteria	Microgenomatia	Candidatus_Woesebacteria	unclassified	unclassified	soil
ASV6040	Patescibacteria	Parcubacteria	Candidatus_Staskawiczbacteria	unclassified	unclassified	soil
ASV6432	Patescibacteria	ABY1	unclassified	unclassified	unclassified	soil
ASV2128	Elusimicrobia	Elusimicrobia	MVP-88	unclassified	unclassified	soil
ASV6001	Elusimicrobia	Lineage_IIc	unclassified	unclassified	unclassified	soil
ASV3482	Elusimicrobia	Lineage_IIa	unclassified	unclassified	unclassified	soil
ASV4469	Elusimicrobia	Lineage_IIa	unclassified	unclassified	unclassified	soil
ASV4694	Elusimicrobia	Lineage_IIa	unclassified	unclassified	unclassified	soil
ASV5097	Elusimicrobia	Lineage_IIa	unclassified	unclassified	unclassified	soil
ASV4067	Elusimicrobia	Lineage_IIa	unclassified	unclassified	unclassified	soil
ASV4083	Elusimicrobia	Lineage_IIa	unclassified	unclassified	unclassified	soil
ASV3485	Elusimicrobia	Lineage_IIa	unclassified	unclassified	unclassified	soil
ASV4487	Elusimicrobia	Lineage_IIa	unclassified	unclassified	unclassified	soil
ASV5781	Elusimicrobia	Lineage_IIb	unclassified	unclassified	unclassified	soil
ASV6195	Elusimicrobia	Lineage_IIb	unclassified	unclassified	unclassified	soil
ASV3753	Elusimicrobia	Lineage_IIb	unclassified	unclassified	unclassified	soil
ASV3464	Elusimicrobia	Lineage_IIb	unclassified	unclassified	unclassified	soil
ASV4877	Elusimicrobia	Lineage_IIb	unclassified	unclassified	unclassified	soil
ASV4250	Elusimicrobia	Lineage_IIb	unclassified	unclassified	unclassified	soil
ASV6239	Elusimicrobia	Elusimicrobia	Lineage_IV	unclassified	unclassified	soil
ASV5756	Elusimicrobia	Elusimicrobia	Lineage_IV	unclassified	unclassified	soil
ASV2796	Elusimicrobia	Elusimicrobia	Lineage_IV	unclassified	unclassified	soil
ASV4697	Elusimicrobia	Elusimicrobia	Lineage_IV	unclassified	unclassified	soil
ASV4489	Elusimicrobia	Elusimicrobia	Lineage_IV	unclassified	unclassified	soil
ASV1547	Elusimicrobia	Elusimicrobia	Lineage_IV	unclassified	unclassified	soil
ASV4871	Elusimicrobia	Elusimicrobia	Lineage_IV	unclassified	unclassified	soil
ASV5124	Elusimicrobia	Elusimicrobia	Lineage_IV	unclassified	unclassified	soil
ASV5604	Elusimicrobia	Elusimicrobia	Lineage_IV	unclassified	unclassified	soil
ASV4091	Elusimicrobia	Elusimicrobia	Lineage_IV	unclassified	unclassified	soil
ASV4276	Elusimicrobia	Elusimicrobia	Lineage_IV	unclassified	unclassified	soil
ASV5349	Elusimicrobia	Elusimicrobia	Lineage_IV	unclassified	unclassified	soil
ASV5993	Elusimicrobia	Elusimicrobia	Lineage_IV	unclassified	unclassified	soil
ASV6185	Elusimicrobia	Elusimicrobia	Lineage_IV	unclassified	unclassified	soil
ASV437	Verrucomicrobia	Verrucomicrobiae	Opitutales	Opitutaceae	Lacunisphaera	soil
ASV5782	Verrucomicrobia	Verrucomicrobiae	Opitutales	Opitutaceae	Lacunisphaera	soil
ASV5982	Verrucomicrobia	Verrucomicrobiae	Opitutales	Opitutaceae	Lacunisphaera	soil
ASV5383	Verrucomicrobia	Verrucomicrobiae	Opitutales	Opitutaceae	unclassified	soil
ASV1127	Verrucomicrobia	Verrucomicrobiae	Opitutales	Opitutaceae	unclassified	soil
ASV4059	Verrucomicrobia	Verrucomicrobiae	Opitutales	Opitutaceae	Opitutus	soil
ASV3478	Verrucomicrobia	Verrucomicrobiae	Opitutales	Opitutaceae	Opitutus	soil
ASV1085	Verrucomicrobia	Verrucomicrobiae	Opitutales	Opitutaceae	Opitutus	soil
ASV1866	Verrucomicrobia	Verrucomicrobiae	Opitutales	Opitutaceae	Opitutus	soil
ASV3005	Verrucomicrobia	Verrucomicrobiae	Opitutales	Opitutaceae	Opitutus	soil
ASV2893	Verrucomicrobia	Verrucomicrobiae	Opitutales	Opitutaceae	Opitutus	soil
ASV5569	Verrucomicrobia	Verrucomicrobiae	S-BQ2-57_soil_group	unclassified	unclassified	soil
ASV5799	Verrucomicrobia	Verrucomicrobiae	S-BQ2-57_soil_group	unclassified	unclassified	soil
ASV5588	Verrucomicrobia	Verrucomicrobiae	S-BQ2-57_soil_group	unclassified	unclassified	soil
ASV3752	Verrucomicrobia	Verrucomicrobiae	Pedosphaerales	Pedosphaeraceae	unclassified	soil
ASV3488	Verrucomicrobia	Verrucomicrobiae	Pedosphaerales	Pedosphaeraceae	unclassified	soil
ASV6002	Verrucomicrobia	Verrucomicrobiae	Pedosphaerales	Pedosphaeraceae	unclassified	soil
ASV1658	Verrucomicrobia	Verrucomicrobiae	Pedosphaerales	Pedosphaeraceae	Pedosphaera	soil
ASV1909	Verrucomicrobia	Verrucomicrobiae	Pedosphaerales	Pedosphaeraceae	Pedosphaera	soil
ASV2540	Verrucomicrobia	Verrucomicrobiae	Pedosphaerales	Pedosphaeraceae	Pedosphaera	soil
ASV1548	Verrucomicrobia	Verrucomicrobiae	Pedosphaerales	Pedosphaeraceae	Pedosphaera	soil
ASV3467	Verrucomicrobia	Verrucomicrobiae	Pedosphaerales	Pedosphaeraceae	unclassified	soil
ASV3340	Verrucomicrobia	Verrucomicrobiae	Pedosphaerales	Pedosphaeraceae	unclassified	soil
ASV5084	Verrucomicrobia	Verrucomicrobiae	Pedosphaerales	Pedosphaeraceae	unclassified	soil
ASV3891	Verrucomicrobia	Verrucomicrobiae	Pedosphaerales	Pedosphaeraceae	unclassified	soil
ASV4680	Verrucomicrobia	Verrucomicrobiae	Pedosphaerales	Pedosphaeraceae	unclassified	soil
ASV4678	Verrucomicrobia	Verrucomicrobiae	Pedosphaerales	Pedosphaeraceae	unclassified	soil
ASV5137	Verrucomicrobia	Verrucomicrobiae	Pedosphaerales	Pedosphaeraceae	unclassified	soil
ASV5085	Verrucomicrobia	Verrucomicrobiae	Pedosphaerales	Pedosphaeraceae	unclassified	soil
ASV2196	Verrucomicrobia	Verrucomicrobiae	Pedosphaerales	Pedosphaeraceae	unclassified	soil
ASV2792	Verrucomicrobia	Verrucomicrobiae	Pedosphaerales	Pedosphaeraceae	unclassified	soil
ASV4077	Verrucomicrobia	Verrucomicrobiae	Pedosphaerales	Pedosphaeraceae	unclassified	soil
ASV1546	Verrucomicrobia	Verrucomicrobiae	Pedosphaerales	Pedosphaeraceae	unclassified	soil
ASV3757	Verrucomicrobia	Verrucomicrobiae	Pedosphaerales	Pedosphaeraceae	unclassified	soil
ASV6391	Verrucomicrobia	Verrucomicrobiae	Pedosphaerales	Pedosphaeraceae	unclassified	soil
ASV2888	Verrucomicrobia	Verrucomicrobiae	Pedosphaerales	Pedosphaeraceae	unclassified	soil
ASV4668	Verrucomicrobia	Verrucomicrobiae	Pedosphaerales	Pedosphaeraceae	unclassified	soil
ASV2133	Verrucomicrobia	Verrucomicrobiae	Pedosphaerales	Pedosphaeraceae	unclassified	soil
ASV5382	Verrucomicrobia	Verrucomicrobiae	Pedosphaerales	Pedosphaeraceae	unclassified	soil
ASV2132	Verrucomicrobia	Verrucomicrobiae	Pedosphaerales	Pedosphaeraceae	unclassified	soil
ASV4707	Verrucomicrobia	Verrucomicrobiae	Pedosphaerales	Pedosphaeraceae	unclassified	soil
ASV6175	Verrucomicrobia	Verrucomicrobiae	Pedosphaerales	Pedosphaeraceae	unclassified	soil
ASV4706	Verrucomicrobia	Verrucomicrobiae	Pedosphaerales	Pedosphaeraceae	unclassified	soil
ASV3892	Verrucomicrobia	Verrucomicrobiae	Pedosphaerales	Pedosphaeraceae	Pedosphaera	soil
ASV4664	Verrucomicrobia	Verrucomicrobiae	Pedosphaerales	Pedosphaeraceae	ADurb.Bin063-1	soil
ASV6029	Verrucomicrobia	Verrucomicrobiae	Pedosphaerales	Pedosphaeraceae	ADurb.Bin063-1	soil
ASV3119	Verrucomicrobia	Verrucomicrobiae	Pedosphaerales	Pedosphaeraceae	ADurb.Bin063-1	soil
ASV1213	Verrucomicrobia	Verrucomicrobiae	Pedosphaerales	Pedosphaeraceae	unclassified	soil
ASV1583	Verrucomicrobia	Verrucomicrobiae	Pedosphaerales	Pedosphaeraceae	ADurb.Bin063-1	soil
ASV4677	Verrucomicrobia	Verrucomicrobiae	Pedosphaerales	Pedosphaeraceae	unclassified	soil
ASV4883	Verrucomicrobia	Verrucomicrobiae	Pedosphaerales	Pedosphaeraceae	ADurb.Bin063-1	soil
ASV4247	Verrucomicrobia	Verrucomicrobiae	Pedosphaerales	Pedosphaeraceae	ADurb.Bin063-1	soil
ASV2335	Verrucomicrobia	Verrucomicrobiae	Pedosphaerales	Pedosphaeraceae	ADurb.Bin063-1	soil
ASV4273	Verrucomicrobia	Verrucomicrobiae	Pedosphaerales	Pedosphaeraceae	unclassified	soil
ASV3000	Verrucomicrobia	Verrucomicrobiae	Pedosphaerales	Pedosphaeraceae	unclassified	soil
ASV5369	Verrucomicrobia	Verrucomicrobiae	Pedosphaerales	Pedosphaeraceae	unclassified	soil
ASV5558	Verrucomicrobia	Verrucomicrobiae	Pedosphaerales	Pedosphaeraceae	unclassified	soil
ASV4899	Verrucomicrobia	Verrucomicrobiae	Pedosphaerales	Pedosphaeraceae	unclassified	soil
ASV1341	Verrucomicrobia	Verrucomicrobiae	Pedosphaerales	Pedosphaeraceae	ADurb.Bin063-1	soil
ASV4248	Verrucomicrobia	Verrucomicrobiae	Pedosphaerales	Pedosphaeraceae	ADurb.Bin063-1	soil
ASV5995	Verrucomicrobia	Verrucomicrobiae	Pedosphaerales	Pedosphaeraceae	unclassified	soil
ASV5344	Verrucomicrobia	Verrucomicrobiae	Pedosphaerales	Pedosphaeraceae	unclassified	soil
ASV5556	Verrucomicrobia	Verrucomicrobiae	Pedosphaerales	Pedosphaeraceae	unclassified	soil
ASV222	Verrucomicrobia	Verrucomicrobiae	Pedosphaerales	Pedosphaeraceae	ADurb.Bin063-1	soil
ASV2393	Verrucomicrobia	Verrucomicrobiae	Pedosphaerales	Pedosphaeraceae	ADurb.Bin063-1	soil
ASV2624	Verrucomicrobia	Verrucomicrobiae	Pedosphaerales	Pedosphaeraceae	ADurb.Bin063-1	soil
ASV2615	Verrucomicrobia	Verrucomicrobiae	Pedosphaerales	Pedosphaeraceae	unclassified	soil
ASV5778	Verrucomicrobia	Verrucomicrobiae	Pedosphaerales	Pedosphaeraceae	unclassified	soil
ASV1977	Verrucomicrobia	Verrucomicrobiae	Pedosphaerales	Pedosphaeraceae	unclassified	soil
ASV2711	Verrucomicrobia	Verrucomicrobiae	Pedosphaerales	Pedosphaeraceae	unclassified	soil
ASV5751	Verrucomicrobia	Verrucomicrobiae	Methylacidiphilales	Methylacidiphilaceae	unclassified	soil
ASV5311	Verrucomicrobia	Verrucomicrobiae	Methylacidiphilales	Methylacidiphilaceae	unclassified	soil
ASV5621	Verrucomicrobia	Verrucomicrobiae	Methylacidiphilales	Methylacidiphilaceae	unclassified	soil
ASV4661	Verrucomicrobia	Verrucomicrobiae	Pedosphaerales	Pedosphaeraceae	unclassified	soil
ASV4918	Verrucomicrobia	Verrucomicrobiae	Pedosphaerales	Pedosphaeraceae	unclassified	soil
ASV3234	Verrucomicrobia	Verrucomicrobiae	Pedosphaerales	Pedosphaeraceae	unclassified	soil
ASV5083	Verrucomicrobia	Verrucomicrobiae	Pedosphaerales	Pedosphaeraceae	unclassified	soil
ASV1613	Verrucomicrobia	Verrucomicrobiae	Pedosphaerales	Pedosphaeraceae	unclassified	soil
ASV5336	Verrucomicrobia	Verrucomicrobiae	Pedosphaerales	Pedosphaeraceae	unclassified	soil
ASV564	Verrucomicrobia	Verrucomicrobiae	Pedosphaerales	Pedosphaeraceae	unclassified	soil
ASV456	Verrucomicrobia	Verrucomicrobiae	Pedosphaerales	Pedosphaeraceae	unclassified	soil
ASV4089	Verrucomicrobia	Verrucomicrobiae	Pedosphaerales	Pedosphaeraceae	unclassified	soil
ASV2070	Verrucomicrobia	Verrucomicrobiae	Pedosphaerales	Pedosphaeraceae	unclassified	soil
ASV6154	Verrucomicrobia	Verrucomicrobiae	Verrucomicrobiales	Verrucomicrobiaceae	unclassified	soil
ASV4666	Verrucomicrobia	Verrucomicrobiae	Verrucomicrobiales	Verrucomicrobiaceae	Prosthecobacter	soil
ASV6008	Verrucomicrobia	Verrucomicrobiae	Verrucomicrobiales	Verrucomicrobiaceae	unclassified	soil
ASV6019	Verrucomicrobia	Verrucomicrobiae	Verrucomicrobiales	Verrucomicrobiaceae	unclassified	soil
ASV6164	Verrucomicrobia	Verrucomicrobiae	Verrucomicrobiales	unclassified	unclassified	soil
ASV5610	Verrucomicrobia	Verrucomicrobiae	Verrucomicrobiales	Verrucomicrobiaceae	unclassified	soil
ASV6325	Verrucomicrobia	Verrucomicrobiae	unclassified	unclassified	unclassified	soil
ASV5983	Verrucomicrobia	Verrucomicrobiae	Verrucomicrobiales	Verrucomicrobiaceae	Roseimicrobium	soil
ASV6159	Verrucomicrobia	Verrucomicrobiae	unclassified	unclassified	unclassified	soil
ASV5355	Verrucomicrobia	Verrucomicrobiae	Verrucomicrobiales	unclassified	unclassified	soil
ASV6296	Verrucomicrobia	Verrucomicrobiae	Verrucomicrobiales	unclassified	unclassified	soil
ASV6346	Verrucomicrobia	Verrucomicrobiae	Verrucomicrobiales	Verrucomicrobiaceae	unclassified	soil
ASV6149	Verrucomicrobia	Verrucomicrobiae	Verrucomicrobiales	Rubritaleaceae	Luteolibacter	soil
ASV5337	Verrucomicrobia	Verrucomicrobiae	unclassified	unclassified	unclassified	soil
ASV6193	Verrucomicrobia	Verrucomicrobiae	unclassified	unclassified	unclassified	soil
ASV5308	Verrucomicrobia	Verrucomicrobiae	unclassified	unclassified	unclassified	soil
ASV5348	Verrucomicrobia	Verrucomicrobiae	Chthoniobacterales	Chthoniobacteraceae	Chthoniobacter	soil
ASV1040	Verrucomicrobia	Verrucomicrobiae	Chthoniobacterales	Chthoniobacteraceae	Chthoniobacter	soil
ASV3779	Verrucomicrobia	Verrucomicrobiae	Chthoniobacterales	Chthoniobacteraceae	LD29	soil
ASV3465	Verrucomicrobia	Verrucomicrobiae	Chthoniobacterales	Chthoniobacteraceae	Chthoniobacter	soil
ASV3907	Verrucomicrobia	Verrucomicrobiae	Chthoniobacterales	Chthoniobacteraceae	Chthoniobacter	soil
ASV3477	Verrucomicrobia	Verrucomicrobiae	Chthoniobacterales	Chthoniobacteraceae	Chthoniobacter	soil
ASV2900	Verrucomicrobia	Verrucomicrobiae	Chthoniobacterales	Chthoniobacteraceae	Chthoniobacter	soil
ASV4925	Verrucomicrobia	Verrucomicrobiae	unclassified	unclassified	unclassified	soil
ASV875	Verrucomicrobia	Verrucomicrobiae	Chthoniobacterales	Xiphinematobacteraceae	Candidatus_Xiphinematobacter	soil
ASV5609	Verrucomicrobia	Verrucomicrobiae	Chthoniobacterales	Chthoniobacteraceae	Candidatus_Udaeobacter	soil
ASV5371	Verrucomicrobia	Verrucomicrobiae	Chthoniobacterales	Chthoniobacteraceae	Candidatus_Udaeobacter	soil
ASV4894	Verrucomicrobia	Verrucomicrobiae	Chthoniobacterales	Chthoniobacteraceae	Candidatus_Udaeobacter	soil
ASV3341	Verrucomicrobia	Verrucomicrobiae	Chthoniobacterales	Chthoniobacteraceae	Candidatus_Udaeobacter	soil
ASV6217	Omnitrophicaeota	unclassified	unclassified	unclassified	unclassified	soil
ASV5750	Omnitrophicaeota	Omnitrophia	Omnitrophales	Omnitrophaceae	Candidatus_Omnitrophus	soil
ASV5112	Omnitrophicaeota	Omnitrophia	Omnitrophales	Omnitrophaceae	Candidatus_Omnitrophus	soil
ASV6400	Omnitrophicaeota	Omnitrophia	Omnitrophales	Omnitrophaceae	Candidatus_Omnitrophus	soil
ASV6236	Omnitrophicaeota	Omnitrophia	Omnitrophales	Omnitrophaceae	Candidatus_Omnitrophus	soil
ASV6420	Omnitrophicaeota	Omnitrophia	Omnitrophales	Omnitrophaceae	Candidatus_Omnitrophus	soil
ASV5789	Omnitrophicaeota	Omnitrophia	Omnitrophales	Omnitrophaceae	Candidatus_Omnitrophus	soil
ASV6176	Proteobacteria	Gammaproteobacteria	Gammaproteobacteria_Incertae_Sedis	Unknown_Family	Candidatus_Ovatusbacter	soil
ASV5825	Proteobacteria	Gammaproteobacteria	unclassified	unclassified	unclassified	soil
ASV5766	Proteobacteria	Gammaproteobacteria	Coxiellales	Coxiellaceae	Coxiella	soil
ASV5990	Proteobacteria	Gammaproteobacteria	unclassified	unclassified	unclassified	soil
ASV6207	Proteobacteria	Gammaproteobacteria	unclassified	unclassified	unclassified	soil
ASV5616	Proteobacteria	Gammaproteobacteria	Legionellales	Legionellaceae	Legionella	soil
ASV6238	Proteobacteria	Gammaproteobacteria	unclassified	unclassified	unclassified	soil
ASV5562	Proteobacteria	Gammaproteobacteria	unclassified	unclassified	unclassified	soil
ASV6004	Proteobacteria	Gammaproteobacteria	Diplorickettsiales	Diplorickettsiaceae	Aquicella	soil
ASV6024	Proteobacteria	Gammaproteobacteria	unclassified	unclassified	unclassified	soil
ASV572	Proteobacteria	Gammaproteobacteria	Gammaproteobacteria_Incertae_Sedis	Unknown_Family	Acidibacter	soil
ASV4092	Proteobacteria	Gammaproteobacteria	Gammaproteobacteria_Incertae_Sedis	Unknown_Family	Acidibacter	soil
ASV1821	Proteobacteria	Gammaproteobacteria	Gammaproteobacteria_Incertae_Sedis	Unknown_Family	Acidibacter	soil
ASV5160	Proteobacteria	Gammaproteobacteria	Gammaproteobacteria_Incertae_Sedis	Unknown_Family	Acidibacter	soil
ASV998	Proteobacteria	Gammaproteobacteria	Gammaproteobacteria_Incertae_Sedis	Unknown_Family	Acidibacter	soil
ASV780	Proteobacteria	Gammaproteobacteria	Gammaproteobacteria_Incertae_Sedis	Unknown_Family	Acidibacter	soil
ASV2077	Proteobacteria	Gammaproteobacteria	Gammaproteobacteria_Incertae_Sedis	Unknown_Family	Acidibacter	soil
ASV5823	Spirochaetes	Spirochaetia	Spirochaetales	Spirochaetaceae	Spirochaeta_2	soil
ASV6158	Spirochaetes	Spirochaetia	Spirochaetales	Spirochaetaceae	Spirochaeta_2	soil
ASV6045	Spirochaetes	Spirochaetia	Spirochaetales	Spirochaetaceae	Spirochaeta_2	soil
ASV5765	Proteobacteria	Deltaproteobacteria	Bdellovibrionales	Bacteriovoracaceae	Bacteriovorax	soil
ASV5820	Proteobacteria	Deltaproteobacteria	Bdellovibrionales	Bacteriovoracaceae	Peredibacter	soil
ASV6307	Proteobacteria	Deltaproteobacteria	Oligoflexales	Oligoflexaceae	Silvanigrella	soil
ASV6043	Proteobacteria	unclassified	unclassified	unclassified	unclassified	soil
ASV6304	Proteobacteria	Deltaproteobacteria	Oligoflexales	Oligoflexaceae	unclassified	soil
ASV4689	Proteobacteria	unclassified	unclassified	unclassified	unclassified	soil
ASV5608	Proteobacteria	unclassified	unclassified	unclassified	unclassified	soil
ASV6406	Proteobacteria	Deltaproteobacteria	Oligoflexales	Oligoflexaceae	Oligoflexus	soil
ASV6335	Proteobacteria	Deltaproteobacteria	Oligoflexales	Oligoflexaceae	unclassified	soil
ASV6208	Proteobacteria	Deltaproteobacteria	Oligoflexales	Oligoflexaceae	unclassified	soil
ASV6166	Proteobacteria	Deltaproteobacteria	Oligoflexales	Oligoflexaceae	unclassified	soil
ASV5748	Proteobacteria	Deltaproteobacteria	Oligoflexales	Oligoflexaceae	unclassified	soil
ASV5999	Proteobacteria	Deltaproteobacteria	Oligoflexales	Oligoflexaceae	unclassified	soil
ASV6219	Proteobacteria	Deltaproteobacteria	Oligoflexales	Oligoflexaceae	unclassified	soil
ASV5779	Planctomycetes	Planctomycetacia	unclassified	unclassified	unclassified	soil
ASV5373	Planctomycetes	Planctomycetacia	Gemmatales	Gemmataceae	unclassified	soil
ASV5150	Planctomycetes	Planctomycetacia	Gemmatales	Gemmataceae	unclassified	soil
ASV3901	Planctomycetes	Planctomycetacia	Gemmatales	Gemmataceae	unclassified	soil
ASV6212	Planctomycetes	Planctomycetacia	Gemmatales	Gemmataceae	unclassified	soil
ASV5747	Planctomycetes	Planctomycetacia	Gemmatales	Gemmataceae	unclassified	soil
ASV2465	Planctomycetes	Planctomycetacia	Gemmatales	Gemmataceae	unclassified	soil
ASV3344	Planctomycetes	Planctomycetacia	Gemmatales	Gemmataceae	unclassified	soil
ASV5360	Planctomycetes	Planctomycetacia	Gemmatales	Gemmataceae	unclassified	soil
ASV4490	Planctomycetes	Planctomycetacia	Gemmatales	Gemmataceae	unclassified	soil
ASV524	Planctomycetes	Planctomycetacia	Gemmatales	Gemmataceae	unclassified	soil
ASV4287	Planctomycetes	Planctomycetacia	Gemmatales	Gemmataceae	unclassified	soil
ASV5136	Planctomycetes	Planctomycetacia	Gemmatales	Gemmataceae	unclassified	soil
ASV2472	Planctomycetes	Planctomycetacia	Gemmatales	Gemmataceae	unclassified	soil
ASV3486	Planctomycetes	Planctomycetacia	Gemmatales	Gemmataceae	unclassified	soil
ASV5607	Planctomycetes	Planctomycetacia	unclassified	unclassified	unclassified	soil
ASV2710	Planctomycetes	Planctomycetacia	Gemmatales	Gemmataceae	unclassified	soil
ASV4081	Planctomycetes	Planctomycetacia	Gemmatales	Gemmataceae	unclassified	soil
ASV5585	Planctomycetes	Planctomycetacia	Gemmatales	Gemmataceae	unclassified	soil
ASV2134	Planctomycetes	Planctomycetacia	Gemmatales	Gemmataceae	unclassified	soil
ASV3914	Planctomycetes	Planctomycetacia	Gemmatales	Gemmataceae	unclassified	soil
ASV3114	Planctomycetes	Planctomycetacia	Gemmatales	Gemmataceae	unclassified	soil
ASV4057	Planctomycetes	Planctomycetacia	Gemmatales	Gemmataceae	unclassified	soil
ASV4500	Planctomycetes	Planctomycetacia	Gemmatales	Gemmataceae	unclassified	soil
ASV3106	Planctomycetes	Planctomycetacia	Gemmatales	Gemmataceae	unclassified	soil
ASV4065	Planctomycetes	Planctomycetacia	Gemmatales	Gemmataceae	unclassified	soil
ASV5307	Planctomycetes	Planctomycetacia	Gemmatales	Gemmataceae	unclassified	soil
ASV6210	Planctomycetes	Planctomycetacia	Gemmatales	Gemmataceae	unclassified	soil
ASV5350	Planctomycetes	Planctomycetacia	Gemmatales	Gemmataceae	unclassified	soil
ASV5368	Planctomycetes	Planctomycetacia	Gemmatales	Gemmataceae	unclassified	soil
ASV4062	Planctomycetes	Planctomycetacia	Gemmatales	Gemmataceae	unclassified	soil
ASV5108	Planctomycetes	Planctomycetacia	Gemmatales	Gemmataceae	unclassified	soil
ASV4255	Planctomycetes	Planctomycetacia	Gemmatales	Gemmataceae	unclassified	soil
ASV1974	Planctomycetes	Planctomycetacia	Gemmatales	Gemmataceae	unclassified	soil
ASV2130	Planctomycetes	Planctomycetacia	Gemmatales	Gemmataceae	unclassified	soil
ASV5553	Planctomycetes	Planctomycetacia	Gemmatales	Gemmataceae	Fimbriiglobus	soil
ASV5104	Planctomycetes	Planctomycetacia	Gemmatales	Gemmataceae	Gemmata	soil
ASV2262	Planctomycetes	Planctomycetacia	Gemmatales	Gemmataceae	Gemmata	soil
ASV5806	Planctomycetes	Planctomycetacia	Gemmatales	Gemmataceae	Gemmata	soil
ASV5759	Planctomycetes	Planctomycetacia	Gemmatales	Gemmataceae	unclassified	soil
ASV1251	Planctomycetes	Planctomycetacia	Gemmatales	Gemmataceae	Gemmata	soil
ASV4266	Planctomycetes	Planctomycetacia	Gemmatales	Gemmataceae	Gemmata	soil
ASV1516	Planctomycetes	Planctomycetacia	Gemmatales	Gemmataceae	Gemmata	soil
ASV3353	Planctomycetes	Planctomycetacia	Gemmatales	Gemmataceae	Gemmata	soil
ASV5614	Planctomycetes	Planctomycetacia	Gemmatales	Gemmataceae	Fimbriiglobus	soil
ASV4074	Planctomycetes	Planctomycetacia	Gemmatales	Gemmataceae	unclassified	soil
ASV3912	Planctomycetes	Planctomycetacia	Gemmatales	Gemmataceae	unclassified	soil
ASV4457	Planctomycetes	Planctomycetacia	Gemmatales	Gemmataceae	unclassified	soil
ASV1515	Planctomycetes	Planctomycetacia	Gemmatales	Gemmataceae	unclassified	soil
ASV3908	Planctomycetes	Planctomycetacia	Gemmatales	Gemmataceae	unclassified	soil
ASV4879	Planctomycetes	Planctomycetacia	Gemmatales	Gemmataceae	unclassified	soil
ASV4461	Planctomycetes	Planctomycetacia	Gemmatales	Gemmataceae	unclassified	soil
ASV5622	Planctomycetes	Planctomycetacia	Gemmatales	Gemmataceae	unclassified	soil
ASV6034	Planctomycetes	Planctomycetacia	Gemmatales	Gemmataceae	unclassified	soil
ASV5154	Planctomycetes	Planctomycetacia	Gemmatales	Gemmataceae	unclassified	soil
ASV5826	Planctomycetes	Planctomycetacia	Gemmatales	Gemmataceae	unclassified	soil
ASV5141	Planctomycetes	Planctomycetacia	Gemmatales	Gemmataceae	unclassified	soil
ASV5157	Planctomycetes	Planctomycetacia	Isosphaerales	Isosphaeraceae	unclassified	soil
ASV2789	Planctomycetes	Planctomycetacia	Isosphaerales	Isosphaeraceae	unclassified	soil
ASV4497	Planctomycetes	Planctomycetacia	Isosphaerales	Isosphaeraceae	unclassified	soil
ASV2131	Planctomycetes	Planctomycetacia	Isosphaerales	Isosphaeraceae	Singulisphaera	soil
ASV1455	Planctomycetes	Planctomycetacia	Isosphaerales	Isosphaeraceae	Singulisphaera	soil
ASV2469	Planctomycetes	Planctomycetacia	Isosphaerales	Isosphaeraceae	Singulisphaera	soil
ASV2401	Planctomycetes	Planctomycetacia	Isosphaerales	Isosphaeraceae	Singulisphaera	soil
ASV4279	Planctomycetes	Planctomycetacia	Isosphaerales	Isosphaeraceae	unclassified	soil
ASV6225	Planctomycetes	Planctomycetacia	Isosphaerales	Isosphaeraceae	unclassified	soil
ASV5110	Planctomycetes	Planctomycetacia	Isosphaerales	Isosphaeraceae	unclassified	soil
ASV5830	Planctomycetes	Planctomycetacia	Gemmatales	Gemmataceae	unclassified	soil
ASV3917	Planctomycetes	Planctomycetacia	Gemmatales	Gemmataceae	unclassified	soil
ASV2389	Planctomycetes	Planctomycetacia	Gemmatales	Gemmataceae	unclassified	soil
ASV4066	Planctomycetes	Planctomycetacia	Gemmatales	Gemmataceae	unclassified	soil
ASV4486	Planctomycetes	Planctomycetacia	Gemmatales	Gemmataceae	unclassified	soil
ASV5343	Planctomycetes	Planctomycetacia	Gemmatales	Gemmataceae	unclassified	soil
ASV6214	Planctomycetes	Planctomycetacia	Gemmatales	Gemmataceae	unclassified	soil
ASV3476	Planctomycetes	Planctomycetacia	Gemmatales	Gemmataceae	unclassified	soil
ASV4663	Planctomycetes	Planctomycetacia	Gemmatales	Gemmataceae	unclassified	soil
ASV5761	Planctomycetes	Planctomycetacia	Gemmatales	Gemmataceae	unclassified	soil
ASV2798	Planctomycetes	Planctomycetacia	Gemmatales	Gemmataceae	unclassified	soil
ASV1153	Planctomycetes	Planctomycetacia	Gemmatales	Gemmataceae	unclassified	soil
ASV5138	Planctomycetes	Planctomycetacia	Gemmatales	Gemmataceae	unclassified	soil
ASV4703	Planctomycetes	Planctomycetacia	Gemmatales	Gemmataceae	unclassified	soil
ASV6233	Planctomycetes	Planctomycetacia	Planctomycetales	Schlesneriaceae	Schlesneria	soil
ASV5555	Planctomycetes	Planctomycetacia	Planctomycetales	unclassified	unclassified	soil
ASV5566	Planctomycetes	Planctomycetacia	Planctomycetales	Gimesiaceae	unclassified	soil
ASV5320	Planctomycetes	Planctomycetacia	Pirellulales	Pirellulaceae	unclassified	soil
ASV4701	Planctomycetes	Planctomycetacia	Pirellulales	Pirellulaceae	unclassified	soil
ASV5546	Planctomycetes	Planctomycetacia	Pirellulales	Pirellulaceae	unclassified	soil
ASV6155	Planctomycetes	Planctomycetacia	Pirellulales	Pirellulaceae	unclassified	soil
ASV4071	Planctomycetes	Planctomycetacia	Pirellulales	Pirellulaceae	unclassified	soil
ASV2193	Planctomycetes	Planctomycetacia	Pirellulales	Pirellulaceae	unclassified	soil
ASV3628	Planctomycetes	Planctomycetacia	Pirellulales	Pirellulaceae	unclassified	soil
ASV6187	Planctomycetes	Planctomycetacia	Pirellulales	Pirellulaceae	unclassified	soil
ASV6169	Planctomycetes	Planctomycetacia	Pirellulales	Pirellulaceae	unclassified	soil
ASV2786	Planctomycetes	Planctomycetacia	Pirellulales	Pirellulaceae	Pirellula	soil
ASV1661	Planctomycetes	Planctomycetacia	Pirellulales	Pirellulaceae	Pirellula	soil
ASV3919	Planctomycetes	Planctomycetacia	Pirellulales	Pirellulaceae	Pirellula	soil
ASV5572	Planctomycetes	Planctomycetacia	Pirellulales	Pirellulaceae	Pirellula	soil
ASV3104	Planctomycetes	Phycisphaerae	Tepidisphaerales	CPla-3_termite_group	unclassified	soil
ASV6237	Planctomycetes	Phycisphaerae	Tepidisphaerales	CPla-3_termite_group	unclassified	soil
ASV2885	Planctomycetes	Phycisphaerae	Tepidisphaerales	CPla-3_termite_group	unclassified	soil
ASV4482	Planctomycetes	Phycisphaerae	Tepidisphaerales	CPla-3_termite_group	unclassified	soil
ASV4693	Planctomycetes	Phycisphaerae	Tepidisphaerales	CPla-3_termite_group	unclassified	soil
ASV5327	Planctomycetes	Phycisphaerae	Tepidisphaerales	CPla-3_termite_group	unclassified	soil
ASV5568	Planctomycetes	Phycisphaerae	Tepidisphaerales	CPla-3_termite_group	unclassified	soil
ASV5140	Planctomycetes	Phycisphaerae	Tepidisphaerales	CPla-3_termite_group	unclassified	soil
ASV5303	Planctomycetes	Phycisphaerae	Phycisphaerales	Phycisphaeraceae	Phycisphaera	soil
ASV2467	Planctomycetes	Phycisphaerae	Phycisphaerales	Phycisphaeraceae	Phycisphaera	soil
ASV6199	Planctomycetes	Phycisphaerae	Phycisphaerales	Phycisphaeraceae	SM1A02	soil
ASV5123	Planctomycetes	Phycisphaerae	Phycisphaerales	Phycisphaeraceae	SM1A02	soil
ASV5088	Planctomycetes	Phycisphaerae	Phycisphaerales	Phycisphaeraceae	SM1A02	soil
ASV5357	Planctomycetes	Phycisphaerae	Tepidisphaerales	WD2101_soil_group	unclassified	soil
ASV3229	Planctomycetes	Phycisphaerae	Tepidisphaerales	WD2101_soil_group	unclassified	soil
ASV5315	Planctomycetes	Phycisphaerae	Tepidisphaerales	WD2101_soil_group	unclassified	soil
ASV2537	Planctomycetes	Phycisphaerae	Tepidisphaerales	WD2101_soil_group	unclassified	soil
ASV3112	Planctomycetes	Phycisphaerae	Tepidisphaerales	WD2101_soil_group	unclassified	soil
ASV1185	Planctomycetes	Phycisphaerae	Tepidisphaerales	WD2101_soil_group	unclassified	soil
ASV3616	Planctomycetes	Phycisphaerae	Tepidisphaerales	WD2101_soil_group	unclassified	soil
ASV3116	Planctomycetes	Phycisphaerae	Tepidisphaerales	WD2101_soil_group	unclassified	soil
ASV1820	Planctomycetes	Phycisphaerae	Tepidisphaerales	WD2101_soil_group	unclassified	soil
ASV1007	Planctomycetes	Phycisphaerae	Tepidisphaerales	WD2101_soil_group	unclassified	soil
ASV4473	Planctomycetes	Phycisphaerae	Tepidisphaerales	WD2101_soil_group	unclassified	soil
ASV3346	Planctomycetes	Phycisphaerae	Tepidisphaerales	WD2101_soil_group	unclassified	soil
ASV4654	Planctomycetes	Phycisphaerae	Tepidisphaerales	WD2101_soil_group	unclassified	soil
ASV2714	Planctomycetes	Phycisphaerae	Tepidisphaerales	WD2101_soil_group	unclassified	soil
ASV1397	Planctomycetes	Phycisphaerae	Tepidisphaerales	WD2101_soil_group	unclassified	soil
ASV4246	Planctomycetes	Phycisphaerae	Tepidisphaerales	WD2101_soil_group	unclassified	soil
ASV4270	Planctomycetes	Phycisphaerae	Tepidisphaerales	WD2101_soil_group	unclassified	soil
ASV4874	Planctomycetes	Phycisphaerae	Tepidisphaerales	WD2101_soil_group	unclassified	soil
ASV5790	Planctomycetes	Phycisphaerae	Tepidisphaerales	WD2101_soil_group	unclassified	soil
ASV2996	Planctomycetes	Phycisphaerae	Tepidisphaerales	WD2101_soil_group	unclassified	soil
ASV4888	Planctomycetes	Phycisphaerae	Tepidisphaerales	WD2101_soil_group	unclassified	soil
ASV1090	Planctomycetes	Phycisphaerae	Tepidisphaerales	WD2101_soil_group	unclassified	soil
ASV1281	Planctomycetes	Phycisphaerae	Tepidisphaerales	WD2101_soil_group	unclassified	soil
ASV2473	Planctomycetes	Phycisphaerae	Tepidisphaerales	WD2101_soil_group	unclassified	soil
ASV3008	Planctomycetes	Phycisphaerae	Tepidisphaerales	WD2101_soil_group	unclassified	soil
ASV2892	Planctomycetes	Phycisphaerae	Tepidisphaerales	WD2101_soil_group	unclassified	soil
ASV1907	Planctomycetes	Phycisphaerae	Tepidisphaerales	WD2101_soil_group	unclassified	soil
ASV5552	Planctomycetes	Phycisphaerae	Tepidisphaerales	WD2101_soil_group	unclassified	soil
ASV4462	Planctomycetes	Phycisphaerae	Tepidisphaerales	WD2101_soil_group	unclassified	soil
ASV4477	Planctomycetes	Phycisphaerae	Tepidisphaerales	WD2101_soil_group	unclassified	soil
ASV6150	Planctomycetes	Phycisphaerae	Tepidisphaerales	WD2101_soil_group	unclassified	soil
ASV5139	Planctomycetes	Phycisphaerae	Tepidisphaerales	WD2101_soil_group	unclassified	soil
ASV4459	Planctomycetes	Phycisphaerae	Tepidisphaerales	WD2101_soil_group	unclassified	soil
ASV4895	Planctomycetes	Phycisphaerae	Tepidisphaerales	WD2101_soil_group	unclassified	soil
ASV2463	Planctomycetes	Phycisphaerae	Tepidisphaerales	WD2101_soil_group	unclassified	soil
ASV6183	Planctomycetes	Phycisphaerae	Tepidisphaerales	WD2101_soil_group	unclassified	soil
ASV6047	Planctomycetes	Phycisphaerae	Tepidisphaerales	WD2101_soil_group	unclassified	soil
ASV5613	Planctomycetes	Phycisphaerae	Tepidisphaerales	WD2101_soil_group	unclassified	soil
ASV4483	Planctomycetes	Phycisphaerae	Tepidisphaerales	WD2101_soil_group	unclassified	soil
ASV4460	Planctomycetes	unclassified	unclassified	unclassified	unclassified	soil
ASV6039	Planctomycetes	Phycisphaerae	unclassified	unclassified	unclassified	soil
ASV6184	Planctomycetes	unclassified	unclassified	unclassified	unclassified	soil
ASV6345	Planctomycetes	Pla4_lineage	unclassified	unclassified	unclassified	soil
ASV3619	Armatimonadetes	Chthonomonadetes	Chthonomonadales	Chthonomonadaceae	Chthonomonas	soil
ASV1545	Armatimonadetes	Chthonomonadetes	Chthonomonadales	Chthonomonadaceae	Chthonomonas	soil
ASV2398	Armatimonadetes	Chthonomonadetes	Chthonomonadales	Chthonomonadaceae	Chthonomonas	soil
ASV2074	Armatimonadetes	Chthonomonadetes	Chthonomonadales	Chthonomonadaceae	Chthonomonas	soil
ASV6049	GAL15	unclassified	unclassified	unclassified	unclassified	soil
ASV6394	Chloroflexi	unclassified	unclassified	unclassified	unclassified	soil
ASV5586	Chloroflexi	Chloroflexia	Thermomicrobiales	JG30-KF-CM45	unclassified	soil
ASV5548	Chloroflexi	Chloroflexia	Thermomicrobiales	JG30-KF-CM45	unclassified	soil
ASV5560	Chloroflexi	Chloroflexia	unclassified	unclassified	unclassified	soil
ASV6189	Chloroflexi	unclassified	unclassified	unclassified	unclassified	soil
ASV5091	Chloroflexi	Ktedonobacteria	C0119	unclassified	unclassified	soil
ASV6025	Chloroflexi	unclassified	unclassified	unclassified	unclassified	soil
ASV5100	Chloroflexi	Anaerolineae	RBG-13-54-9	unclassified	unclassified	soil
ASV6240	Chloroflexi	Anaerolineae	unclassified	unclassified	unclassified	soil
ASV4915	Chloroflexi	Anaerolineae	RBG-13-54-9	unclassified	unclassified	soil
ASV5775	Chloroflexi	P2-11E	unclassified	unclassified	unclassified	soil
ASV6426	Chloroflexi	P2-11E	unclassified	unclassified	unclassified	soil
ASV6192	Chloroflexi	P2-11E	unclassified	unclassified	unclassified	soil
ASV4699	Chloroflexi	Ktedonobacteria	Ktedonobacterales	JG30-KF-AS9	unclassified	soil
ASV5158	Chloroflexi	Ktedonobacteria	Ktedonobacterales	JG30-KF-AS9	unclassified	soil
ASV6156	Chloroflexi	Ktedonobacteria	Ktedonobacterales	JG30-KF-AS9	unclassified	soil
ASV1699	Chloroflexi	Ktedonobacteria	Ktedonobacterales	JG30-KF-AS9	unclassified	soil
ASV3902	Chloroflexi	Ktedonobacteria	Ktedonobacterales	JG30-KF-AS9	unclassified	soil
ASV5304	Chloroflexi	Ktedonobacteria	Ktedonobacterales	Ktedonobacteraceae	unclassified	soil
ASV5151	Chloroflexi	Ktedonobacteria	Ktedonobacterales	Ktedonobacteraceae	unclassified	soil
ASV6331	Chloroflexi	Ktedonobacteria	Ktedonobacterales	Ktedonobacteraceae	unclassified	soil
ASV3468	Chloroflexi	Ktedonobacteria	Ktedonobacterales	Ktedonobacteraceae	unclassified	soil
ASV5338	Chloroflexi	Ktedonobacteria	Ktedonobacterales	Ktedonobacteraceae	unclassified	soil
ASV3474	Chloroflexi	Ktedonobacteria	Ktedonobacterales	Ktedonobacteraceae	1921-3	soil
ASV6224	Chloroflexi	Ktedonobacteria	Ktedonobacterales	Ktedonobacteraceae	1921-3	soil
ASV6311	Chloroflexi	Ktedonobacteria	Ktedonobacterales	Ktedonobacteraceae	unclassified	soil
ASV6200	Chloroflexi	Ktedonobacteria	Ktedonobacterales	Ktedonobacteraceae	FCPS473	soil
ASV4695	Chloroflexi	Ktedonobacteria	Ktedonobacterales	Ktedonobacteraceae	unclassified	soil
ASV4080	Chloroflexi	Ktedonobacteria	Ktedonobacterales	Ktedonobacteraceae	FCPS473	soil
ASV4893	Chloroflexi	Ktedonobacteria	Ktedonobacterales	Ktedonobacteraceae	FCPS473	soil
ASV5094	Chloroflexi	Ktedonobacteria	Ktedonobacterales	Ktedonobacteraceae	FCPS473	soil
ASV4671	Chloroflexi	Ktedonobacteria	Ktedonobacterales	Ktedonobacteraceae	unclassified	soil
ASV5144	Chloroflexi	Ktedonobacteria	Ktedonobacterales	Ktedonobacteraceae	1921-3	soil
ASV5785	Chloroflexi	Ktedonobacteria	Ktedonobacterales	Ktedonobacteraceae	unclassified	soil
ASV5356	Chloroflexi	Ktedonobacteria	Ktedonobacterales	Ktedonobacteraceae	1921-3	soil
ASV5574	Chloroflexi	Ktedonobacteria	Ktedonobacterales	Ktedonobacteraceae	1921-3	soil
ASV4876	Chloroflexi	Ktedonobacteria	Ktedonobacterales	Ktedonobacteraceae	unclassified	soil
ASV4485	Chloroflexi	Ktedonobacteria	Ktedonobacterales	Ktedonobacteraceae	1959-1	soil
ASV4657	Chloroflexi	Ktedonobacteria	Ktedonobacterales	Ktedonobacteraceae	unclassified	soil
ASV5126	Chloroflexi	Ktedonobacteria	Ktedonobacterales	Ktedonobacteraceae	unclassified	soil
ASV5346	Chloroflexi	Ktedonobacteria	Ktedonobacterales	Ktedonobacteraceae	unclassified	soil
ASV6191	Chloroflexi	Ktedonobacteria	Ktedonobacterales	Ktedonobacteraceae	unclassified	soil
ASV5125	Chloroflexi	Ktedonobacteria	Ktedonobacterales	Ktedonobacteraceae	1921-3	soil
ASV5598	Chloroflexi	Ktedonobacteria	Ktedonobacterales	Ktedonobacteraceae	1921-3	soil
ASV5319	Chloroflexi	Ktedonobacteria	Ktedonobacterales	Ktedonobacteraceae	1921-3	soil
ASV6348	Chloroflexi	Ktedonobacteria	Ktedonobacterales	Ktedonobacteraceae	unclassified	soil
ASV5792	Chloroflexi	Ktedonobacteria	Ktedonobacterales	Ktedonobacteraceae	unclassified	soil
ASV5581	Chloroflexi	Ktedonobacteria	Ktedonobacterales	Ktedonobacteraceae	unclassified	soil
ASV5302	Chloroflexi	Ktedonobacteria	Ktedonobacterales	Ktedonobacteraceae	unclassified	soil
ASV6310	Chloroflexi	Ktedonobacteria	Ktedonobacterales	Ktedonobacteraceae	unclassified	soil
ASV5352	Chloroflexi	Ktedonobacteria	Ktedonobacterales	Ktedonobacteraceae	unclassified	soil
ASV4084	Chloroflexi	Ktedonobacteria	Ktedonobacterales	Ktedonobacteraceae	HSB_OF53-F07	soil
ASV5987	Chloroflexi	Ktedonobacteria	Ktedonobacterales	Ktedonobacteraceae	HSB_OF53-F07	soil
ASV3001	Chloroflexi	Ktedonobacteria	Ktedonobacterales	Ktedonobacteraceae	unclassified	soil
ASV6038	Chloroflexi	Ktedonobacteria	Ktedonobacterales	Ktedonobacteraceae	unclassified	soil
ASV6334	Chloroflexi	Ktedonobacteria	Ktedonobacterales	Ktedonobacteraceae	unclassified	soil
ASV6343	Chloroflexi	Ktedonobacteria	Ktedonobacterales	Ktedonobacteraceae	JG30a-KF-32	soil
ASV5105	Chloroflexi	Ktedonobacteria	Ktedonobacterales	Ktedonobacteraceae	unclassified	soil
ASV5788	Chloroflexi	unclassified	unclassified	unclassified	unclassified	soil
ASV5795	Chloroflexi	Anaerolineae	SBR1031	unclassified	unclassified	soil
ASV5103	Chloroflexi	Anaerolineae	SBR1031	unclassified	unclassified	soil
ASV3350	Chloroflexi	Anaerolineae	SBR1031	unclassified	unclassified	soil
ASV5341	Chloroflexi	Anaerolineae	SBR1031	unclassified	unclassified	soil
ASV5602	Chloroflexi	unclassified	unclassified	unclassified	unclassified	soil
ASV6146	Chloroflexi	Anaerolineae	SBR1031	A4b	unclassified	soil
ASV6211	Chloroflexi	Anaerolineae	SBR1031	A4b	unclassified	soil
ASV4454	Chloroflexi	Anaerolineae	SBR1031	unclassified	unclassified	soil
ASV6216	Chloroflexi	Anaerolineae	SBR1031	unclassified	unclassified	soil
ASV5780	Chloroflexi	Anaerolineae	Anaerolineales	Anaerolineaceae	unclassified	soil
ASV802	Chloroflexi	Anaerolineae	Anaerolineales	Anaerolineaceae	unclassified	soil
ASV292	Chloroflexi	Anaerolineae	Anaerolineales	Anaerolineaceae	unclassified	soil
ASV6220	Chloroflexi	Anaerolineae	RBG-13-54-9	unclassified	unclassified	soil
ASV4463	Chloroflexi	Anaerolineae	RBG-13-54-9	unclassified	unclassified	soil
ASV6218	Chloroflexi	Anaerolineae	RBG-13-54-9	unclassified	unclassified	soil
ASV4275	Chloroflexi	Ktedonobacteria	C0119	unclassified	unclassified	soil
ASV2622	Chloroflexi	Ktedonobacteria	C0119	unclassified	unclassified	soil
ASV4078	Chloroflexi	Ktedonobacteria	C0119	unclassified	unclassified	soil
ASV5092	Chloroflexi	OLB14	unclassified	unclassified	unclassified	soil
ASV6168	Chloroflexi	JG30-KF-CM66	unclassified	unclassified	unclassified	soil
ASV5617	Chloroflexi	unclassified	unclassified	unclassified	unclassified	soil
ASV3120	Chloroflexi	TK10	unclassified	unclassified	unclassified	soil
ASV1054	Chloroflexi	TK10	unclassified	unclassified	unclassified	soil
ASV1169	Chloroflexi	TK10	unclassified	unclassified	unclassified	soil
ASV948	Chloroflexi	TK10	unclassified	unclassified	unclassified	soil
ASV2608	Chloroflexi	TK10	unclassified	unclassified	unclassified	soil
ASV1978	Chloroflexi	TK10	unclassified	unclassified	unclassified	soil
ASV5561	Chloroflexi	TK10	unclassified	unclassified	unclassified	soil
ASV4281	Chloroflexi	TK10	unclassified	unclassified	unclassified	soil
ASV5801	Chloroflexi	TK10	unclassified	unclassified	unclassified	soil
ASV1659	Chloroflexi	Anaerolineae	unclassified	unclassified	unclassified	soil
ASV949	Chloroflexi	Anaerolineae	unclassified	unclassified	unclassified	soil
ASV5128	Chloroflexi	Anaerolineae	unclassified	unclassified	unclassified	soil
ASV6222	Chloroflexi	Anaerolineae	Caldilineales	Caldilineaceae	unclassified	soil
ASV6349	Chloroflexi	Anaerolineae	Caldilineales	Caldilineaceae	unclassified	soil
ASV6198	Chloroflexi	Chloroflexia	Kallotenuales	AKIW781	unclassified	soil
ASV5797	Chloroflexi	Ktedonobacteria	B12-WMSP1	unclassified	unclassified	soil
ASV3777	Firmicutes	Bacilli	Bacillales	Paenibacillaceae	Paenibacillus	soil
ASV4450	Firmicutes	Bacilli	Bacillales	Paenibacillaceae	unclassified	soil
ASV5570	Firmicutes	Bacilli	Bacillales	unclassified	unclassified	soil
ASV2535	Firmicutes	Bacilli	Bacillales	Planococcaceae	unclassified	soil
ASV2539	Firmicutes	Erysipelotrichia	Erysipelotrichales	Erysipelotrichaceae	Turicibacter	soil
ASV5591	Firmicutes	Clostridia	Clostridiales	Ruminococcaceae	Ruminococcaceae_V9D2013_group	soil
ASV4073	Firmicutes	Clostridia	Clostridiales	Lachnospiraceae	unclassified	soil
ASV4267	Chloroflexi	KD4-96	unclassified	unclassified	unclassified	soil
ASV5817	Chloroflexi	Dehalococcoidia	S085	unclassified	unclassified	soil
ASV2791	Chloroflexi	Dehalococcoidia	S085	unclassified	unclassified	soil
ASV5120	Chloroflexi	Dehalococcoidia	S085	unclassified	unclassified	soil
ASV5142	Acidobacteria	Subgroup_6	unclassified	unclassified	unclassified	soil
ASV4700	Acidobacteria	Subgroup_6	unclassified	unclassified	unclassified	soil
ASV4686	Latescibacteria	unclassified	unclassified	unclassified	unclassified	soil
ASV2612	Latescibacteria	unclassified	unclassified	unclassified	unclassified	soil
ASV4907	Latescibacteria	unclassified	unclassified	unclassified	unclassified	soil
ASV3625	Acidobacteria	Acidobacteriia	Solibacterales	Solibacteraceae_(Subgroup_3)	Candidatus_Solibacter	soil
ASV2333	Acidobacteria	Acidobacteriia	Solibacterales	Solibacteraceae_(Subgroup_3)	Candidatus_Solibacter	soil
ASV6315	Acidobacteria	Acidobacteriia	Solibacterales	Solibacteraceae_(Subgroup_3)	Candidatus_Solibacter	soil
ASV1398	Acidobacteria	Acidobacteriia	Solibacterales	Solibacteraceae_(Subgroup_3)	Candidatus_Solibacter	soil
ASV1655	Acidobacteria	Acidobacteriia	Solibacterales	Solibacteraceae_(Subgroup_3)	Candidatus_Solibacter	soil
ASV3618	Acidobacteria	Acidobacteriia	Solibacterales	Solibacteraceae_(Subgroup_3)	Candidatus_Solibacter	soil
ASV1738	Acidobacteria	Acidobacteriia	Solibacterales	Solibacteraceae_(Subgroup_3)	Candidatus_Solibacter	soil
ASV5118	Acidobacteria	Acidobacteriia	Solibacterales	Solibacteraceae_(Subgroup_3)	Candidatus_Solibacter	soil
ASV3603	Acidobacteria	Acidobacteriia	Solibacterales	Solibacteraceae_(Subgroup_3)	Candidatus_Solibacter	soil
ASV3232	Acidobacteria	Acidobacteriia	Solibacterales	Solibacteraceae_(Subgroup_3)	Candidatus_Solibacter	soil
ASV2404	Acidobacteria	Acidobacteriia	Solibacterales	Solibacteraceae_(Subgroup_3)	Candidatus_Solibacter	soil
ASV989	Acidobacteria	Acidobacteriia	Solibacterales	Solibacteraceae_(Subgroup_3)	Candidatus_Solibacter	soil
ASV122	Acidobacteria	Acidobacteriia	Solibacterales	Solibacteraceae_(Subgroup_3)	Candidatus_Solibacter	soil
ASV5547	Acidobacteria	Acidobacteriia	Solibacterales	Solibacteraceae_(Subgroup_3)	Candidatus_Solibacter	soil
ASV4260	Acidobacteria	Acidobacteriia	Solibacterales	Solibacteraceae_(Subgroup_3)	unclassified	soil
ASV1865	Acidobacteria	Acidobacteriia	Solibacterales	Solibacteraceae_(Subgroup_3)	Bryobacter	soil
ASV4086	Acidobacteria	Acidobacteriia	Solibacterales	Solibacteraceae_(Subgroup_3)	Bryobacter	soil
ASV2475	Acidobacteria	Acidobacteriia	Solibacterales	Solibacteraceae_(Subgroup_3)	Bryobacter	soil
ASV5129	Acidobacteria	Acidobacteriia	Solibacterales	Solibacteraceae_(Subgroup_3)	Bryobacter	soil
ASV2712	Acidobacteria	Acidobacteriia	Solibacterales	Solibacteraceae_(Subgroup_3)	Bryobacter	soil
ASV2075	Acidobacteria	Acidobacteriia	Solibacterales	Solibacteraceae_(Subgroup_3)	Bryobacter	soil
ASV4919	Acidobacteria	Acidobacteriia	Solibacterales	Solibacteraceae_(Subgroup_3)	Bryobacter	soil
ASV5365	Acidobacteria	Acidobacteriia	Solibacterales	Solibacteraceae_(Subgroup_3)	Bryobacter	soil
ASV6007	Acidobacteria	Acidobacteriia	Subgroup_12	unclassified	unclassified	soil
ASV6320	Acidobacteria	Acidobacteriia	Subgroup_12	unclassified	unclassified	soil
ASV420	Acidobacteria	Acidobacteriia	Subgroup_2	unclassified	unclassified	soil
ASV2618	Acidobacteria	Acidobacteriia	Subgroup_2	unclassified	unclassified	soil
ASV648	Acidobacteria	Acidobacteriia	Subgroup_2	unclassified	unclassified	soil
ASV1484	Acidobacteria	Acidobacteriia	Subgroup_2	unclassified	unclassified	soil
ASV137	Acidobacteria	Acidobacteriia	Subgroup_2	unclassified	unclassified	soil
ASV2027	Acidobacteria	Acidobacteriia	Acidobacteriales	unclassified	unclassified	soil
ASV336	Acidobacteria	Acidobacteriia	Acidobacteriales	unclassified	unclassified	soil
ASV1228	Acidobacteria	Acidobacteriia	Acidobacteriales	unclassified	unclassified	soil
ASV2331	Acidobacteria	Acidobacteriia	Acidobacteriales	unclassified	unclassified	soil
ASV345	Acidobacteria	Acidobacteriia	Acidobacteriales	unclassified	unclassified	soil
ASV1314	Acidobacteria	Acidobacteriia	Acidobacteriales	Acidobacteriaceae_(Subgroup_1)	Granulicella	soil
ASV6449	Acidobacteria	Acidobacteriia	Acidobacteriales	Acidobacteriaceae_(Subgroup_1)	Granulicella	soil
ASV3118	Acidobacteria	Acidobacteriia	Acidobacteriales	Acidobacteriaceae_(Subgroup_1)	Edaphobacter	soil
ASV5819	Acidobacteria	Acidobacteriia	Acidobacteriales	Acidobacteriaceae_(Subgroup_1)	unclassified	soil
ASV2126	Acidobacteria	Acidobacteriia	Acidobacteriales	Acidobacteriaceae_(Subgroup_1)	unclassified	soil
ASV5114	Acidobacteria	Acidobacteriia	Acidobacteriales	Acidobacteriaceae_(Subgroup_1)	Granulicella	soil
ASV2794	Acidobacteria	Acidobacteriia	Acidobacteriales	Acidobacteriaceae_(Subgroup_1)	Bryocella	soil
ASV5623	Acidobacteria	Acidobacteriia	Acidobacteriales	Acidobacteriaceae_(Subgroup_1)	unclassified	soil
ASV6448	Acidobacteria	Acidobacteriia	Acidobacteriales	Acidobacteriaceae_(Subgroup_1)	Edaphobacter	soil
ASV1584	Acidobacteria	Acidobacteriia	Acidobacteriales	Acidobacteriaceae_(Subgroup_1)	Granulicella	soil
ASV1008	Acidobacteria	Acidobacteriia	Acidobacteriales	Acidobacteriaceae_(Subgroup_1)	Terriglobus	soil
ASV2617	Acidobacteria	Acidobacteriia	Acidobacteriales	Acidobacteriaceae_(Subgroup_1)	Terriglobus	soil
ASV1975	Acidobacteria	Acidobacteriia	Acidobacteriales	Acidobacteriaceae_(Subgroup_1)	Acidipila	soil
ASV5804	Acidobacteria	Acidobacteriia	Acidobacteriales	Acidobacteriaceae_(Subgroup_1)	unclassified	soil
ASV5314	Acidobacteria	Acidobacteriia	Acidobacteriales	Acidobacteriaceae_(Subgroup_1)	unclassified	soil
ASV4495	Acidobacteria	Acidobacteriia	Acidobacteriales	Acidobacteriaceae_(Subgroup_1)	unclassified	soil
ASV618	Acidobacteria	Acidobacteriia	Acidobacteriales	Acidobacteriaceae_(Subgroup_1)	unclassified	soil
ASV1663	Acidobacteria	Acidobacteriia	Acidobacteriales	Acidobacteriaceae_(Subgroup_1)	unclassified	soil
ASV999	Acidobacteria	Acidobacteriia	Acidobacteriales	unclassified	unclassified	soil
ASV6316	Acidobacteria	Acidobacteriia	Acidobacteriales	unclassified	unclassified	soil
ASV446	Acidobacteria	Acidobacteriia	Acidobacteriales	unclassified	unclassified	soil
ASV1074	Acidobacteria	Acidobacteriia	Acidobacteriales	unclassified	unclassified	soil
ASV1483	Acidobacteria	Acidobacteriia	Acidobacteriales	unclassified	unclassified	soil
ASV1698	Acidobacteria	Acidobacteriia	Acidobacteriales	unclassified	unclassified	soil
ASV4900	Acidobacteria	Acidobacteriia	Acidobacteriales	unclassified	unclassified	soil
ASV4478	Acidobacteria	Acidobacteriia	Acidobacteriales	unclassified	unclassified	soil
ASV1396	Acidobacteria	Acidobacteriia	Acidobacteriales	unclassified	unclassified	soil
ASV5130	Acidobacteria	Acidobacteriia	Acidobacteriales	unclassified	unclassified	soil
ASV1031	Acidobacteria	Acidobacteriia	Acidobacteriales	unclassified	unclassified	soil
ASV1867	Acidobacteria	Acidobacteriia	Acidobacteriales	unclassified	unclassified	soil
ASV2470	Acidobacteria	Acidobacteriia	Acidobacteriales	unclassified	unclassified	soil
ASV3910	Acidobacteria	Acidobacteriia	Acidobacteriales	unclassified	unclassified	soil
ASV3111	Acidobacteria	Acidobacteriia	Acidobacteriales	unclassified	unclassified	soil
ASV4058	Acidobacteria	Acidobacteriia	Acidobacteriales	unclassified	unclassified	soil
ASV6157	Acidobacteria	Acidobacteriia	Acidobacteriales	unclassified	unclassified	soil
ASV2788	Acidobacteria	Acidobacteriia	Acidobacteriales	unclassified	unclassified	soil
ASV2997	Acidobacteria	Acidobacteriia	Acidobacteriales	unclassified	unclassified	soil
ASV874	Acidobacteria	Acidobacteriia	Acidobacteriales	unclassified	unclassified	soil
ASV937	Acidobacteria	Acidobacteriia	Acidobacteriales	unclassified	unclassified	soil
ASV146	Acidobacteria	Acidobacteriia	Acidobacteriales	unclassified	unclassified	soil
ASV570	Acidobacteria	Acidobacteriia	Acidobacteriales	unclassified	unclassified	soil
ASV1777	Acidobacteria	Acidobacteriia	Acidobacteriales	unclassified	unclassified	soil
ASV2902	Acidobacteria	Acidobacteriia	Acidobacteriales	Koribacteraceae	Candidatus_Koribacter	soil
ASV4085	Acidobacteria	Acidobacteriia	Acidobacteriales	Koribacteraceae	Candidatus_Koribacter	soil
ASV6201	Acidobacteria	Acidobacteriia	Acidobacteriales	Koribacteraceae	Candidatus_Koribacter	soil
ASV6170	Acidobacteria	Acidobacteriia	Acidobacteriales	Koribacteraceae	Candidatus_Koribacter	soil
ASV5986	Acidobacteria	Acidobacteriia	Acidobacteriales	Koribacteraceae	Candidatus_Koribacter	soil
ASV5770	Acidobacteria	Acidobacteriia	Acidobacteriales	Koribacteraceae	Candidatus_Koribacter	soil
ASV1212	Acidobacteria	Acidobacteriia	Acidobacteriales	Koribacteraceae	Candidatus_Koribacter	soil
ASV3121	Acidobacteria	Acidobacteriia	Acidobacteriales	Koribacteraceae	Candidatus_Koribacter	soil
ASV5090	Acidobacteria	Acidobacteriia	Acidobacteriales	unclassified	unclassified	soil
ASV1774	Acidobacteria	Acidobacteriia	Acidobacteriales	unclassified	unclassified	soil
ASV3767	Acidobacteria	Acidobacteriia	Acidobacteriales	unclassified	unclassified	soil
ASV5331	Acidobacteria	Acidobacteriia	Acidobacteriales	unclassified	unclassified	soil
ASV1393	Acidobacteria	Acidobacteriia	Acidobacteriales	unclassified	unclassified	soil
ASV1481	Acidobacteria	Acidobacteriia	Acidobacteriales	unclassified	unclassified	soil
ASV2197	Acidobacteria	Acidobacteriia	Acidobacteriales	unclassified	unclassified	soil
ASV667	Acidobacteria	Acidobacteriia	Acidobacteriales	unclassified	unclassified	soil
ASV6177	Acidobacteria	Acidobacteriia	Acidobacteriales	unclassified	unclassified	soil
ASV4453	Acidobacteria	Acidobacteriia	Acidobacteriales	unclassified	unclassified	soil
ASV6324	Acidobacteria	Acidobacteriia	Acidobacteriales	unclassified	unclassified	soil
ASV6228	Acidobacteria	Acidobacteriia	Acidobacteriales	Acidobacteriaceae_(Subgroup_1)	unclassified	soil
ASV4451	Acidobacteria	Acidobacteriia	Acidobacteriales	unclassified	unclassified	soil
ASV904	Acidobacteria	Acidobacteriia	Acidobacteriales	unclassified	unclassified	soil
ASV4093	Acidobacteria	Acidobacteriia	Acidobacteriales	unclassified	unclassified	soil
ASV1657	Acidobacteria	Subgroup_5	unclassified	unclassified	unclassified	soil
ASV4705	Acidobacteria	Subgroup_5	unclassified	unclassified	unclassified	soil
ASV5145	Acidobacteria	Subgroup_5	unclassified	unclassified	unclassified	soil
ASV3003	Acidobacteria	Subgroup_5	unclassified	unclassified	unclassified	soil
ASV2897	Acidobacteria	Subgroup_5	unclassified	unclassified	unclassified	soil
ASV951	Acidobacteria	Subgroup_5	unclassified	unclassified	unclassified	soil
ASV5332	Acidobacteria	Subgroup_5	unclassified	unclassified	unclassified	soil
ASV4256	Acidobacteria	Subgroup_5	unclassified	unclassified	unclassified	soil
ASV5976	Planctomycetes	Pla4_lineage	unclassified	unclassified	unclassified	soil
ASV3769	Planctomycetes	Pla4_lineage	unclassified	unclassified	unclassified	soil
ASV3342	Planctomycetes	BD7-11	unclassified	unclassified	unclassified	soil
ASV1399	Planctomycetes	BD7-11	unclassified	unclassified	unclassified	soil
ASV3623	Planctomycetes	BD7-11	unclassified	unclassified	unclassified	soil
ASV5093	Planctomycetes	BD7-11	unclassified	unclassified	unclassified	soil
ASV939	Planctomycetes	BD7-11	unclassified	unclassified	unclassified	soil
ASV2715	Proteobacteria	Deltaproteobacteria	RCP2-54	unclassified	unclassified	soil
ASV2901	Proteobacteria	Deltaproteobacteria	RCP2-54	unclassified	unclassified	soil
ASV991	Proteobacteria	Deltaproteobacteria	RCP2-54	unclassified	unclassified	soil
ASV2029	Proteobacteria	Deltaproteobacteria	RCP2-54	unclassified	unclassified	soil
ASV6022	Proteobacteria	Deltaproteobacteria	RCP2-54	unclassified	unclassified	soil
ASV5991	Proteobacteria	unclassified	unclassified	unclassified	unclassified	soil
ASV5095	Proteobacteria	Deltaproteobacteria	unclassified	unclassified	unclassified	soil
ASV6215	Proteobacteria	Deltaproteobacteria	Oligoflexales	0319-6G20	unclassified	soil
ASV5370	Proteobacteria	Deltaproteobacteria	unclassified	unclassified	unclassified	soil
ASV5814	Gemmatimonadetes	BD2-11_terrestrial_group	unclassified	unclassified	unclassified	soil
ASV5768	Nitrospirae	Nitrospira	Nitrospirales	Nitrospiraceae	Nitrospira	soil
ASV1454	Proteobacteria	Gammaproteobacteria	Pseudomonadales	Pseudomonadaceae	Pseudomonas	soil
ASV4698	Proteobacteria	Gammaproteobacteria	Pseudomonadales	Pseudomonadaceae	Pseudomonas	soil
ASV5783	Proteobacteria	Gammaproteobacteria	Legionellales	Legionellaceae	Legionella	soil
ASV5148	Proteobacteria	Gammaproteobacteria	Gammaproteobacteria_Incertae_Sedis	Unknown_Family	Candidatus_Ovatusbacter	soil
ASV4702	Proteobacteria	Gammaproteobacteria	Gammaproteobacteria_Incertae_Sedis	Unknown_Family	Candidatus_Ovatusbacter	soil
ASV5147	Proteobacteria	Gammaproteobacteria	unclassified	unclassified	unclassified	soil
ASV1667	Proteobacteria	Gammaproteobacteria	WD260	unclassified	unclassified	soil
ASV2609	Proteobacteria	Gammaproteobacteria	WD260	unclassified	unclassified	soil
ASV2336	Proteobacteria	Gammaproteobacteria	WD260	unclassified	unclassified	soil
ASV4912	Proteobacteria	Gammaproteobacteria	Steroidobacterales	Steroidobacteraceae	unclassified	soil
ASV6018	Proteobacteria	Gammaproteobacteria	Steroidobacterales	Steroidobacteraceae	unclassified	soil
ASV4289	Proteobacteria	Gammaproteobacteria	Steroidobacterales	Steroidobacteraceae	unclassified	soil
ASV2610	Proteobacteria	Gammaproteobacteria	Diplorickettsiales	Diplorickettsiaceae	unclassified	soil
ASV6044	Proteobacteria	Gammaproteobacteria	Diplorickettsiales	Diplorickettsiaceae	unclassified	soil
ASV1910	Proteobacteria	Gammaproteobacteria	Diplorickettsiales	Diplorickettsiaceae	unclassified	soil
ASV6303	Proteobacteria	Gammaproteobacteria	Diplorickettsiales	Diplorickettsiaceae	unclassified	soil
ASV4878	Proteobacteria	Gammaproteobacteria	Diplorickettsiales	Diplorickettsiaceae	unclassified	soil
ASV4913	Proteobacteria	Gammaproteobacteria	Diplorickettsiales	Diplorickettsiaceae	unclassified	soil
ASV2076	Proteobacteria	Gammaproteobacteria	Diplorickettsiales	Diplorickettsiaceae	unclassified	soil
ASV5791	Proteobacteria	Gammaproteobacteria	Diplorickettsiales	Diplorickettsiaceae	unclassified	soil
ASV6231	Proteobacteria	Gammaproteobacteria	Diplorickettsiales	Diplorickettsiaceae	unclassified	soil
ASV4284	Proteobacteria	Gammaproteobacteria	Diplorickettsiales	Diplorickettsiaceae	unclassified	soil
ASV5595	Proteobacteria	Gammaproteobacteria	Diplorickettsiales	Diplorickettsiaceae	unclassified	soil
ASV6009	Proteobacteria	Gammaproteobacteria	unclassified	unclassified	unclassified	soil
ASV5152	Proteobacteria	Gammaproteobacteria	Coxiellales	Coxiellaceae	Coxiella	soil
ASV6194	Proteobacteria	Gammaproteobacteria	unclassified	unclassified	unclassified	soil
ASV5109	Proteobacteria	Gammaproteobacteria	Coxiellales	Coxiellaceae	Coxiella	soil
ASV4262	Proteobacteria	Gammaproteobacteria	Acidiferrobacterales	Acidiferrobacteraceae	Sulfurifustis	soil
ASV4917	Proteobacteria	Gammaproteobacteria	Acidiferrobacterales	Acidiferrobacteraceae	Sulfurifustis	soil
ASV5571	Proteobacteria	Gammaproteobacteria	unclassified	unclassified	unclassified	soil
ASV3006	Proteobacteria	Gammaproteobacteria	Xanthomonadales	Rhodanobacteraceae	Rudaea	soil
ASV4659	Proteobacteria	Gammaproteobacteria	Xanthomonadales	Rhodanobacteraceae	Rhodanobacter	soil
ASV629	Proteobacteria	Gammaproteobacteria	Xanthomonadales	unclassified	unclassified	soil
ASV3626	Proteobacteria	Gammaproteobacteria	Xanthomonadales	Rhodanobacteraceae	Dyella	soil
ASV2471	Proteobacteria	Gammaproteobacteria	Xanthomonadales	Rhodanobacteraceae	Dokdonella	soil
ASV5579	Proteobacteria	Gammaproteobacteria	Xanthomonadales	Xanthomonadaceae	unclassified	soil
ASV5554	Proteobacteria	Gammaproteobacteria	unclassified	unclassified	unclassified	soil
ASV5592	Proteobacteria	Gammaproteobacteria	unclassified	unclassified	unclassified	soil
ASV5557	Proteobacteria	Gammaproteobacteria	KF-JG30-C25	unclassified	unclassified	soil
ASV3102	Proteobacteria	Gammaproteobacteria	Cellvibrionales	Cellvibrionaceae	Cellvibrio	soil
ASV5335	Proteobacteria	Gammaproteobacteria	Oceanospirillales	Halomonadaceae	Marinospirillum	soil
ASV6329	Proteobacteria	Gammaproteobacteria	Pseudomonadales	Moraxellaceae	Acinetobacter	soil
ASV4263	Proteobacteria	Gammaproteobacteria	Pseudomonadales	Moraxellaceae	Alkanindiges	soil
ASV6179	Proteobacteria	Gammaproteobacteria	Aeromonadales	Aeromonadaceae	Aeromonas	soil
ASV5758	Proteobacteria	Gammaproteobacteria	Salinisphaerales	Solimonadaceae	Nevskia	soil
ASV5298	Proteobacteria	Gammaproteobacteria	Salinisphaerales	Solimonadaceae	Nevskia	soil
ASV6197	Proteobacteria	Gammaproteobacteria	Salinisphaerales	Solimonadaceae	Nevskia	soil
ASV4070	Proteobacteria	Gammaproteobacteria	Salinisphaerales	Solimonadaceae	Alkanibacter	soil
ASV5366	Proteobacteria	Gammaproteobacteria	Salinisphaerales	Solimonadaceae	Alkanibacter	soil
ASV4476	Proteobacteria	Gammaproteobacteria	Salinisphaerales	Solimonadaceae	Alkanibacter	soil
ASV6336	Proteobacteria	Gammaproteobacteria	Salinisphaerales	Solimonadaceae	Alkanibacter	soil
ASV5113	Proteobacteria	Gammaproteobacteria	Salinisphaerales	Solimonadaceae	Polycyclovorans	soil
ASV3233	Proteobacteria	Gammaproteobacteria	Salinisphaerales	Solimonadaceae	Polycyclovorans	soil
ASV2708	Proteobacteria	Gammaproteobacteria	Salinisphaerales	Solimonadaceae	Polycyclovorans	soil
ASV4064	Proteobacteria	Gammaproteobacteria	Salinisphaerales	Solimonadaceae	unclassified	soil
ASV6030	Proteobacteria	Gammaproteobacteria	Salinisphaerales	Solimonadaceae	Polycyclovorans	soil
ASV5362	Proteobacteria	Gammaproteobacteria	Salinisphaerales	Solimonadaceae	Polycyclovorans	soil
ASV5313	Proteobacteria	Gammaproteobacteria	Salinisphaerales	Solimonadaceae	Polycyclovorans	soil
ASV5379	Proteobacteria	Gammaproteobacteria	Salinisphaerales	Solimonadaceae	Polycyclovorans	soil
ASV5816	Proteobacteria	Gammaproteobacteria	Salinisphaerales	Solimonadaceae	Polycyclovorans	soil
ASV5992	Proteobacteria	Gammaproteobacteria	Salinisphaerales	Solimonadaceae	Polycyclovorans	soil
ASV5594	Proteobacteria	Gammaproteobacteria	Salinisphaerales	Solimonadaceae	Polycyclovorans	soil
ASV5098	Proteobacteria	Deltaproteobacteria	Desulfarculales	Desulfarculaceae	unclassified	soil
ASV5375	Proteobacteria	Deltaproteobacteria	unclassified	unclassified	unclassified	soil
ASV5601	Proteobacteria	Deltaproteobacteria	Myxococcales	bacteriap25	unclassified	soil
ASV5970	Proteobacteria	unclassified	unclassified	unclassified	unclassified	soil
ASV5815	Proteobacteria	Deltaproteobacteria	Myxococcales	P3OB-42	unclassified	soil
ASV4889	Proteobacteria	Deltaproteobacteria	Myxococcales	unclassified	unclassified	soil
ASV1702	Proteobacteria	Deltaproteobacteria	Myxococcales	unclassified	unclassified	soil
ASV2334	Proteobacteria	Deltaproteobacteria	Myxococcales	unclassified	unclassified	soil
ASV2466	Proteobacteria	Deltaproteobacteria	Myxococcales	Haliangiaceae	Haliangium	soil
ASV3110	Proteobacteria	Deltaproteobacteria	Myxococcales	unclassified	unclassified	soil
ASV3487	Proteobacteria	Deltaproteobacteria	Myxococcales	Haliangiaceae	Haliangium	soil
ASV4685	Proteobacteria	Deltaproteobacteria	Myxococcales	Haliangiaceae	Haliangium	soil
ASV2199	Proteobacteria	Deltaproteobacteria	Myxococcales	Haliangiaceae	Haliangium	soil
ASV5143	Proteobacteria	Deltaproteobacteria	Myxococcales	Haliangiaceae	Haliangium	soil
ASV5615	Proteobacteria	Deltaproteobacteria	Myxococcales	Haliangiaceae	Haliangium	soil
ASV4916	Proteobacteria	Deltaproteobacteria	Myxococcales	Haliangiaceae	Haliangium	soil
ASV1139	Proteobacteria	Deltaproteobacteria	Myxococcales	Haliangiaceae	Haliangium	soil
ASV6017	Proteobacteria	Deltaproteobacteria	Myxococcales	Haliangiaceae	Haliangium	soil
ASV3913	Proteobacteria	Deltaproteobacteria	Myxococcales	Haliangiaceae	Haliangium	soil
ASV2899	Proteobacteria	Deltaproteobacteria	Myxococcales	Haliangiaceae	Haliangium	soil
ASV5985	Proteobacteria	Deltaproteobacteria	Myxococcales	Haliangiaceae	Haliangium	soil
ASV3759	Proteobacteria	Deltaproteobacteria	Myxococcales	Haliangiaceae	Haliangium	soil
ASV3231	Proteobacteria	Deltaproteobacteria	Myxococcales	Haliangiaceae	Haliangium	soil
ASV3483	Proteobacteria	Deltaproteobacteria	Myxococcales	Haliangiaceae	Haliangium	soil
ASV3620	Proteobacteria	Deltaproteobacteria	Myxococcales	Haliangiaceae	Haliangium	soil
ASV6027	Proteobacteria	Deltaproteobacteria	Myxococcales	Sandaracinaceae	unclassified	soil
ASV4268	Proteobacteria	Deltaproteobacteria	Myxococcales	Sandaracinaceae	unclassified	soil
ASV6042	Proteobacteria	Deltaproteobacteria	Myxococcales	Sandaracinaceae	unclassified	soil
ASV4674	Proteobacteria	Deltaproteobacteria	Myxococcales	mle1-27	unclassified	soil
ASV4891	Proteobacteria	Deltaproteobacteria	Myxococcales	mle1-27	unclassified	soil
ASV3101	Proteobacteria	Deltaproteobacteria	Myxococcales	Polyangiaceae	Aetherobacter	soil
ASV3113	Proteobacteria	Deltaproteobacteria	Myxococcales	Polyangiaceae	unclassified	soil
ASV5299	Proteobacteria	Deltaproteobacteria	Myxococcales	Polyangiaceae	Aetherobacter	soil
ASV2202	Proteobacteria	Deltaproteobacteria	Myxococcales	Polyangiaceae	Aetherobacter	soil
ASV2397	Proteobacteria	Deltaproteobacteria	Myxococcales	Polyangiaceae	unclassified	soil
ASV2619	Proteobacteria	Deltaproteobacteria	Myxococcales	Polyangiaceae	unclassified	soil
ASV1186	Proteobacteria	Deltaproteobacteria	Myxococcales	Polyangiaceae	unclassified	soil
ASV3494	Proteobacteria	Deltaproteobacteria	Myxococcales	Phaselicystidaceae	Phaselicystis	soil
ASV3762	Proteobacteria	Deltaproteobacteria	Myxococcales	Polyangiaceae	Pajaroellobacter	soil
ASV4901	Proteobacteria	Deltaproteobacteria	Myxococcales	Polyangiaceae	Pajaroellobacter	soil
ASV3617	Proteobacteria	Deltaproteobacteria	Myxococcales	Polyangiaceae	Pajaroellobacter	soil
ASV4704	Proteobacteria	Deltaproteobacteria	Myxococcales	Polyangiaceae	Pajaroellobacter	soil
ASV5803	Proteobacteria	Deltaproteobacteria	Myxococcales	Polyangiaceae	Pajaroellobacter	soil
ASV1662	Proteobacteria	Deltaproteobacteria	Myxococcales	Polyangiaceae	Pajaroellobacter	soil
ASV950	Proteobacteria	Deltaproteobacteria	Myxococcales	Polyangiaceae	Pajaroellobacter	soil
ASV5967	Proteobacteria	Deltaproteobacteria	Myxococcales	Polyangiaceae	Pajaroellobacter	soil
ASV3897	Proteobacteria	Deltaproteobacteria	Myxococcales	Polyangiaceae	Pajaroellobacter	soil
ASV2787	Proteobacteria	Deltaproteobacteria	Myxococcales	Polyangiaceae	Pajaroellobacter	soil
ASV2474	Proteobacteria	Deltaproteobacteria	Myxococcales	Polyangiaceae	Pajaroellobacter	soil
ASV2468	Proteobacteria	Deltaproteobacteria	Myxococcales	Polyangiaceae	Pajaroellobacter	soil
ASV5998	Proteobacteria	Deltaproteobacteria	Myxococcales	Polyangiaceae	Pajaroellobacter	soil
ASV3471	Proteobacteria	Deltaproteobacteria	Myxococcales	mle1-27	unclassified	soil
ASV3774	Proteobacteria	Deltaproteobacteria	Myxococcales	mle1-27	unclassified	soil
ASV3115	Proteobacteria	Deltaproteobacteria	Myxococcales	mle1-27	unclassified	soil
ASV5134	Proteobacteria	Deltaproteobacteria	Myxococcales	unclassified	unclassified	soil
ASV5582	Proteobacteria	Deltaproteobacteria	Myxococcales	unclassified	unclassified	soil
ASV4253	Proteobacteria	Deltaproteobacteria	Myxococcales	unclassified	unclassified	soil
ASV2328	Proteobacteria	Deltaproteobacteria	Myxococcales	unclassified	unclassified	soil
ASV2717	Proteobacteria	Deltaproteobacteria	Myxococcales	unclassified	unclassified	soil
ASV6180	Proteobacteria	Deltaproteobacteria	unclassified	unclassified	unclassified	soil
ASV6026	Proteobacteria	Deltaproteobacteria	Myxococcales	Blfdi19	unclassified	soil
ASV5593	Proteobacteria	Deltaproteobacteria	Myxococcales	27F-1492R	unclassified	soil
ASV5805	Proteobacteria	unclassified	unclassified	unclassified	unclassified	soil
ASV5377	Proteobacteria	Deltaproteobacteria	unclassified	unclassified	unclassified	soil
ASV6232	Proteobacteria	unclassified	unclassified	unclassified	unclassified	soil
ASV5106	Acidobacteria	Thermoanaerobaculia	Thermoanaerobaculales	Thermoanaerobaculaceae	Subgroup_10	soil
ASV5794	Acidobacteria	Thermoanaerobaculia	Thermoanaerobaculales	Thermoanaerobaculaceae	Subgroup_10	soil
ASV5087	Acidobacteria	Thermoanaerobaculia	Thermoanaerobaculales	Thermoanaerobaculaceae	Subgroup_10	soil
ASV2194	Acidobacteria	Thermoanaerobaculia	Thermoanaerobaculales	Thermoanaerobaculaceae	Subgroup_10	soil
ASV755	Acidobacteria	Thermoanaerobaculia	Thermoanaerobaculales	Thermoanaerobaculaceae	Subgroup_10	soil
ASV3472	Acidobacteria	Thermoanaerobaculia	Thermoanaerobaculales	Thermoanaerobaculaceae	Subgroup_10	soil
ASV4692	Acidobacteria	Thermoanaerobaculia	Thermoanaerobaculales	Thermoanaerobaculaceae	Subgroup_10	soil
ASV5111	Acidobacteria	Thermoanaerobaculia	Thermoanaerobaculales	Thermoanaerobaculaceae	Subgroup_10	soil
ASV5159	Acidobacteria	Thermoanaerobaculia	Thermoanaerobaculales	Thermoanaerobaculaceae	Subgroup_10	soil
ASV4662	Acidobacteria	Holophagae	Subgroup_7	unclassified	unclassified	soil
ASV88	Acidobacteria	Holophagae	Subgroup_7	unclassified	unclassified	soil
ASV3896	Acidobacteria	Holophagae	Subgroup_7	unclassified	unclassified	soil
ASV1338	Acidobacteria	Holophagae	Subgroup_7	unclassified	unclassified	soil
ASV990	Acidobacteria	Holophagae	Subgroup_7	unclassified	unclassified	soil
ASV579	Acidobacteria	Holophagae	Subgroup_7	unclassified	unclassified	soil
ASV4075	Acidobacteria	Holophagae	Subgroup_7	unclassified	unclassified	soil
ASV6410	Acidobacteria	unclassified	unclassified	unclassified	unclassified	soil
ASV2265	Acidobacteria	Subgroup_17	unclassified	unclassified	unclassified	soil
ASV5121	Acidobacteria	Subgroup_17	unclassified	unclassified	unclassified	soil
ASV5749	Acidobacteria	Subgroup_17	unclassified	unclassified	unclassified	soil
ASV1075	Acidobacteria	Subgroup_6	unclassified	unclassified	unclassified	soil
ASV3627	Acidobacteria	Subgroup_6	unclassified	unclassified	unclassified	soil
ASV6000	Acidobacteria	Subgroup_6	unclassified	unclassified	unclassified	soil
ASV2896	Acidobacteria	Subgroup_6	unclassified	unclassified	unclassified	soil
ASV6205	Acidobacteria	Subgroup_6	unclassified	unclassified	unclassified	soil
ASV1822	Acidobacteria	Subgroup_6	unclassified	unclassified	unclassified	soil
ASV5576	Acidobacteria	Subgroup_6	unclassified	unclassified	unclassified	soil
ASV5754	Acidobacteria	Subgroup_6	unclassified	unclassified	unclassified	soil
ASV287	Acidobacteria	Subgroup_6	unclassified	unclassified	unclassified	soil
ASV5339	Acidobacteria	Subgroup_6	unclassified	unclassified	unclassified	soil
ASV2620	Acidobacteria	Subgroup_6	unclassified	unclassified	unclassified	soil
ASV4481	Acidobacteria	Subgroup_6	unclassified	unclassified	unclassified	soil
ASV4471	Acidobacteria	Subgroup_6	unclassified	unclassified	unclassified	soil
ASV3338	Acidobacteria	Subgroup_6	unclassified	unclassified	unclassified	soil
ASV3604	Acidobacteria	Subgroup_6	unclassified	unclassified	unclassified	soil
ASV3004	Acidobacteria	Subgroup_6	unclassified	unclassified	unclassified	soil
ASV5325	Acidobacteria	Subgroup_6	unclassified	unclassified	unclassified	soil
ASV3918	Acidobacteria	Subgroup_6	unclassified	unclassified	unclassified	soil
ASV5997	Acidobacteria	Subgroup_6	unclassified	unclassified	unclassified	soil
ASV382	Acidobacteria	Subgroup_6	unclassified	unclassified	unclassified	soil
ASV242	Acidobacteria	Subgroup_6	unclassified	unclassified	unclassified	soil
ASV3904	Acidobacteria	Subgroup_6	unclassified	unclassified	unclassified	soil
ASV5564	Acidobacteria	Subgroup_6	unclassified	unclassified	unclassified	soil
ASV6160	Acidobacteria	Subgroup_25	unclassified	unclassified	unclassified	soil
ASV4910	Proteobacteria	Deltaproteobacteria	Myxococcales	KD3-10	unclassified	soil
ASV5342	Proteobacteria	Deltaproteobacteria	Myxococcales	KD3-10	unclassified	soil
ASV2894	Proteobacteria	Deltaproteobacteria	Myxococcales	Archangiaceae	Anaeromyxobacter	soil
ASV4881	Proteobacteria	Deltaproteobacteria	Myxococcales	Archangiaceae	Anaeromyxobacter	soil
ASV5333	Proteobacteria	Deltaproteobacteria	Myxococcales	Archangiaceae	Anaeromyxobacter	soil
ASV3349	Proteobacteria	Deltaproteobacteria	Myxococcales	Archangiaceae	Anaeromyxobacter	soil
ASV2390	Proteobacteria	Deltaproteobacteria	Myxococcales	unclassified	unclassified	soil
ASV3764	Proteobacteria	Deltaproteobacteria	Myxococcales	Archangiaceae	Anaeromyxobacter	soil
ASV661	Proteobacteria	Deltaproteobacteria	Myxococcales	Archangiaceae	Anaeromyxobacter	soil
ASV5132	Proteobacteria	Deltaproteobacteria	Myxococcales	Archangiaceae	Anaeromyxobacter	soil
ASV2391	Proteobacteria	Deltaproteobacteria	Oligoflexales	0319-6G20	unclassified	soil
ASV6153	Proteobacteria	Deltaproteobacteria	Oligoflexales	0319-6G20	unclassified	soil
ASV2201	Proteobacteria	Deltaproteobacteria	Oligoflexales	0319-6G20	unclassified	soil
ASV1979	Proteobacteria	Deltaproteobacteria	Oligoflexales	0319-6G20	unclassified	soil
ASV5618	Proteobacteria	Deltaproteobacteria	Oligoflexales	0319-6G20	unclassified	soil
ASV5828	Proteobacteria	Deltaproteobacteria	Oligoflexales	0319-6G20	unclassified	soil
ASV5089	FCPU426	unclassified	unclassified	unclassified	unclassified	soil
ASV3768	FCPU426	unclassified	unclassified	unclassified	unclassified	soil
ASV4498	FCPU426	unclassified	unclassified	unclassified	unclassified	soil
ASV6032	FCPU426	unclassified	unclassified	unclassified	unclassified	soil
ASV4072	FCPU426	unclassified	unclassified	unclassified	unclassified	soil
ASV4258	Armatimonadetes	unclassified	unclassified	unclassified	unclassified	soil
ASV5122	Armatimonadetes	unclassified	unclassified	unclassified	unclassified	soil
ASV1823	Armatimonadetes	unclassified	unclassified	unclassified	unclassified	soil
ASV3895	Armatimonadetes	unclassified	unclassified	unclassified	unclassified	soil
ASV6020	Armatimonadetes	unclassified	unclassified	unclassified	unclassified	soil
ASV5831	Armatimonadetes	unclassified	unclassified	unclassified	unclassified	soil
ASV5309	Actinobacteria	Actinobacteria	Corynebacteriales	Mycobacteriaceae	Mycobacterium	soil
ASV3624	Actinobacteria	Actinobacteria	Corynebacteriales	Mycobacteriaceae	Mycobacterium	soil
ASV3492	Actinobacteria	Actinobacteria	Micromonosporales	Micromonosporaceae	unclassified	soil
ASV3612	Actinobacteria	Actinobacteria	Micromonosporales	Micromonosporaceae	unclassified	soil
ASV546	Actinobacteria	Actinobacteria	Micromonosporales	Micromonosporaceae	unclassified	soil
ASV1612	Actinobacteria	Actinobacteria	Micromonosporales	Micromonosporaceae	unclassified	soil
ASV2998	Actinobacteria	Actinobacteria	Pseudonocardiales	Pseudonocardiaceae	Crossiella	soil
ASV6318	Actinobacteria	Actinobacteria	unclassified	unclassified	unclassified	soil
ASV2073	Actinobacteria	Actinobacteria	Frankiales	unclassified	unclassified	soil
ASV4658	Actinobacteria	Actinobacteria	Catenulisporales	Actinospicaceae	Actinospica	soil
ASV4264	Actinobacteria	Actinobacteria	Streptomycetales	Streptomycetaceae	Streptacidiphilus	soil
ASV2198	Actinobacteria	Actinobacteria	Streptomycetales	Streptomycetaceae	Streptomyces	soil
ASV2195	Actinobacteria	Actinobacteria	Frankiales	Acidothermaceae	Acidothermus	soil
ASV5611	Actinobacteria	Actinobacteria	Streptosporangiales	Thermomonosporaceae	Actinoallomurus	soil
ASV5972	Actinobacteria	Actinobacteria	Streptosporangiales	Thermomonosporaceae	Actinoallomurus	soil
ASV5117	Actinobacteria	Actinobacteria	Frankiales	Acidothermaceae	Acidothermus	soil
ASV4259	Actinobacteria	Actinobacteria	Streptosporangiales	Thermomonosporaceae	Actinomadura	soil
ASV5975	Actinobacteria	Actinobacteria	Micromonosporales	Micromonosporaceae	Actinocatenispora	soil
ASV5353	Actinobacteria	MB-A2-108	unclassified	unclassified	unclassified	soil
ASV4682	Actinobacteria	Acidimicrobiia	unclassified	unclassified	unclassified	soil
ASV5345	Actinobacteria	Acidimicrobiia	unclassified	unclassified	unclassified	soil
ASV6041	Actinobacteria	Acidimicrobiia	Microtrichales	Ilumatobacteraceae	unclassified	soil
ASV1773	Actinobacteria	Acidimicrobiia	IMCC26256	unclassified	unclassified	soil
ASV3754	Actinobacteria	Acidimicrobiia	unclassified	unclassified	unclassified	soil
ASV3751	Actinobacteria	Acidimicrobiia	unclassified	unclassified	unclassified	soil
ASV3899	Actinobacteria	Acidimicrobiia	unclassified	unclassified	unclassified	soil
ASV4061	Actinobacteria	Acidimicrobiia	unclassified	unclassified	unclassified	soil
ASV920	Actinobacteria	Acidimicrobiia	unclassified	unclassified	unclassified	soil
ASV3773	Actinobacteria	Acidimicrobiia	unclassified	unclassified	unclassified	soil
ASV5102	Actinobacteria	Acidimicrobiia	unclassified	unclassified	unclassified	soil
ASV4884	Actinobacteria	Acidimicrobiia	Microtrichales	unclassified	unclassified	soil
ASV809	Actinobacteria	Acidimicrobiia	IMCC26256	unclassified	unclassified	soil
ASV3235	Actinobacteria	Acidimicrobiia	IMCC26256	unclassified	unclassified	soil
ASV5772	Actinobacteria	unclassified	unclassified	unclassified	unclassified	soil
ASV5757	Actinobacteria	unclassified	unclassified	unclassified	unclassified	soil
ASV5322	Actinobacteria	unclassified	unclassified	unclassified	unclassified	soil
ASV2329	Actinobacteria	Thermoleophilia	Gaiellales	unclassified	unclassified	soil
ASV689	Actinobacteria	Thermoleophilia	Gaiellales	unclassified	unclassified	soil
ASV1913	Actinobacteria	Thermoleophilia	Gaiellales	unclassified	unclassified	soil
ASV3775	Actinobacteria	Thermoleophilia	Gaiellales	unclassified	unclassified	soil
ASV6451	Actinobacteria	Thermoleophilia	Gaiellales	unclassified	unclassified	soil
ASV6452	Actinobacteria	Thermoleophilia	Gaiellales	unclassified	unclassified	soil
ASV4087	Actinobacteria	Thermoleophilia	Gaiellales	unclassified	unclassified	soil
ASV4688	Actinobacteria	Thermoleophilia	Gaiellales	unclassified	unclassified	soil
ASV5575	Actinobacteria	Thermoleophilia	Gaiellales	unclassified	unclassified	soil
ASV3352	Actinobacteria	Thermoleophilia	Gaiellales	Gaiellaceae	Gaiella	soil
ASV5776	Actinobacteria	Thermoleophilia	Gaiellales	unclassified	unclassified	soil
ASV5563	Actinobacteria	Thermoleophilia	Solirubrobacterales	Solirubrobacteraceae	Conexibacter	soil
ASV5752	Actinobacteria	Thermoleophilia	unclassified	unclassified	unclassified	soil
ASV5760	Bacteroidetes	Ignavibacteria	Kryptoniales	BSV26	unclassified	soil
ASV6419	Bacteroidetes	Ignavibacteria	Kryptoniales	BSV26	unclassified	soil
ASV5099	Armatimonadetes	Fimbriimonadia	Fimbriimonadales	Fimbriimonadaceae	unclassified	soil
ASV3772	Armatimonadetes	Fimbriimonadia	Fimbriimonadales	Fimbriimonadaceae	unclassified	soil
ASV3481	Armatimonadetes	Fimbriimonadia	Fimbriimonadales	Fimbriimonadaceae	unclassified	soil
ASV3105	Armatimonadetes	Fimbriimonadia	Fimbriimonadales	Fimbriimonadaceae	unclassified	soil
ASV1339	Armatimonadetes	Fimbriimonadia	Fimbriimonadales	Fimbriimonadaceae	unclassified	soil
ASV3466	Armatimonadetes	Fimbriimonadia	Fimbriimonadales	Fimbriimonadaceae	unclassified	soil
ASV2790	Armatimonadetes	Fimbriimonadia	Fimbriimonadales	Fimbriimonadaceae	unclassified	soil
ASV5323	Armatimonadetes	Armatimonadia	Armatimonadales	unclassified	unclassified	soil
ASV2709	Armatimonadetes	Armatimonadia	Armatimonadales	unclassified	unclassified	soil
ASV4665	Armatimonadetes	Armatimonadia	Armatimonadales	unclassified	unclassified	soil
ASV6326	Armatimonadetes	Armatimonadia	Armatimonadales	unclassified	unclassified	soil
ASV4673	Armatimonadetes	Chthonomonadetes	Chthonomonadales	unclassified	unclassified	soil
ASV2898	Armatimonadetes	Chthonomonadetes	Chthonomonadales	unclassified	unclassified	soil
ASV3357	Chloroflexi	AD3	unclassified	unclassified	unclassified	soil
ASV4669	Chloroflexi	AD3	unclassified	unclassified	unclassified	soil
ASV2402	Chloroflexi	AD3	unclassified	unclassified	unclassified	soil
ASV958	Chloroflexi	AD3	unclassified	unclassified	unclassified	soil
ASV4656	Chloroflexi	unclassified	unclassified	unclassified	unclassified	soil
ASV6152	WPS-2	unclassified	unclassified	unclassified	unclassified	soil
ASV536	Acidobacteria	Blastocatellia_(Subgroup_4)	11-24	unclassified	unclassified	soil
ASV2394	Acidobacteria	Blastocatellia_(Subgroup_4)	11-24	unclassified	unclassified	soil
ASV4679	Acidobacteria	Blastocatellia_(Subgroup_4)	Pyrinomonadales	Pyrinomonadaceae	RB41	soil
ASV452	Acidobacteria	Blastocatellia_(Subgroup_4)	Pyrinomonadales	Pyrinomonadaceae	RB41	soil
ASV3351	Acidobacteria	Blastocatellia_(Subgroup_4)	Blastocatellales	Blastocatellaceae	JGI_0001001-H03	soil
ASV3602	Acidobacteria	Blastocatellia_(Subgroup_4)	Blastocatellales	Blastocatellaceae	JGI_0001001-H03	soil
ASV4480	Acidobacteria	Blastocatellia_(Subgroup_4)	Blastocatellales	Blastocatellaceae	JGI_0001001-H03	soil
ASV3489	Acidobacteria	Blastocatellia_(Subgroup_4)	Blastocatellales	Blastocatellaceae	unclassified	soil
ASV1665	Acidobacteria	Blastocatellia_(Subgroup_4)	Blastocatellales	Blastocatellaceae	unclassified	soil
ASV2616	Acidobacteria	Blastocatellia_(Subgroup_4)	Pyrinomonadales	Pyrinomonadaceae	RB41	soil
ASV2611	Gemmatimonadetes	Gemmatimonadetes	Gemmatimonadales	Gemmatimonadaceae	Gemmatimonas	soil
ASV4082	Gemmatimonadetes	Gemmatimonadetes	Gemmatimonadales	Gemmatimonadaceae	Gemmatimonas	soil
ASV6295	Gemmatimonadetes	Gemmatimonadetes	Gemmatimonadales	Gemmatimonadaceae	Gemmatimonas	soil
ASV5082	Gemmatimonadetes	Gemmatimonadetes	Gemmatimonadales	Gemmatimonadaceae	Gemmatimonas	soil
ASV3909	Gemmatimonadetes	Gemmatimonadetes	Gemmatimonadales	Gemmatimonadaceae	unclassified	soil
ASV6013	Gemmatimonadetes	Gemmatimonadetes	Gemmatimonadales	Gemmatimonadaceae	unclassified	soil
ASV3916	Gemmatimonadetes	Gemmatimonadetes	Gemmatimonadales	Gemmatimonadaceae	unclassified	soil
ASV1091	Gemmatimonadetes	Gemmatimonadetes	Gemmatimonadales	Gemmatimonadaceae	unclassified	soil
ASV5119	Entotheonellaeota	Entotheonellia	Entotheonellales	Entotheonellaceae	unclassified	soil
ASV6221	Entotheonellaeota	Entotheonellia	Entotheonellales	Entotheonellaceae	unclassified	soil
ASV2726	Proteobacteria	Gammaproteobacteria	Betaproteobacteriales	Burkholderiaceae	unclassified	cast
ASV283	Proteobacteria	Gammaproteobacteria	Betaproteobacteriales	Burkholderiaceae	unclassified	cast
ASV367	Proteobacteria	Gammaproteobacteria	Betaproteobacteriales	Burkholderiaceae	unclassified	cast
ASV1298	Proteobacteria	Gammaproteobacteria	Betaproteobacteriales	Burkholderiaceae	unclassified	cast
ASV3240	Proteobacteria	Gammaproteobacteria	Betaproteobacteriales	Burkholderiaceae	unclassified	cast
ASV4732	Proteobacteria	Gammaproteobacteria	Betaproteobacteriales	Burkholderiaceae	Leptothrix	cast
ASV3424	Proteobacteria	Gammaproteobacteria	Betaproteobacteriales	Burkholderiaceae	unclassified	cast
ASV4191	Proteobacteria	Gammaproteobacteria	Betaproteobacteriales	Burkholderiaceae	Comamonas	cast
ASV994	Proteobacteria	Gammaproteobacteria	Betaproteobacteriales	Burkholderiaceae	unclassified	cast
ASV1729	Proteobacteria	Gammaproteobacteria	Betaproteobacteriales	Burkholderiaceae	unclassified	cast
ASV5186	Proteobacteria	Gammaproteobacteria	Betaproteobacteriales	Burkholderiaceae	unclassified	cast
ASV120	Proteobacteria	Gammaproteobacteria	Betaproteobacteriales	Burkholderiaceae	Verminephrobacter	cast
ASV2356	Proteobacteria	Gammaproteobacteria	Betaproteobacteriales	Burkholderiaceae	unclassified	cast
ASV5688	Proteobacteria	Gammaproteobacteria	Betaproteobacteriales	Burkholderiaceae	unclassified	cast
ASV304	Proteobacteria	Gammaproteobacteria	Betaproteobacteriales	Burkholderiaceae	unclassified	cast
ASV462	Proteobacteria	Gammaproteobacteria	Betaproteobacteriales	Burkholderiaceae	Oxalicibacterium	cast
ASV799	Proteobacteria	Gammaproteobacteria	Betaproteobacteriales	Burkholderiaceae	Noviherbaspirillum	cast
ASV1333	Proteobacteria	Gammaproteobacteria	Betaproteobacteriales	Burkholderiaceae	Noviherbaspirillum	cast
ASV3718	Proteobacteria	Gammaproteobacteria	Betaproteobacteriales	Burkholderiaceae	Noviherbaspirillum	cast
ASV5919	Proteobacteria	Gammaproteobacteria	Betaproteobacteriales	unclassified	unclassified	cast
ASV1523	Proteobacteria	Gammaproteobacteria	Betaproteobacteriales	Burkholderiaceae	Cupriavidus	cast
ASV521	Proteobacteria	Gammaproteobacteria	Betaproteobacteriales	Burkholderiaceae	Burkholderia-Caballeronia-Paraburkholderia	cast
ASV1849	Proteobacteria	Gammaproteobacteria	Betaproteobacteriales	Burkholderiaceae	Burkholderia-Caballeronia-Paraburkholderia	cast
ASV4734	Proteobacteria	Gammaproteobacteria	Betaproteobacteriales	A21b	unclassified	cast
ASV408	Proteobacteria	Gammaproteobacteria	Betaproteobacteriales	A21b	unclassified	cast
ASV4866	Proteobacteria	Gammaproteobacteria	Betaproteobacteriales	A21b	unclassified	cast
ASV1377	Proteobacteria	Gammaproteobacteria	Betaproteobacteriales	A21b	unclassified	cast
ASV1207	Proteobacteria	Gammaproteobacteria	Betaproteobacteriales	Nitrosomonadaceae	mle1-7	cast
ASV2650	Proteobacteria	Gammaproteobacteria	Betaproteobacteriales	Nitrosomonadaceae	mle1-7	cast
ASV1279	Proteobacteria	Gammaproteobacteria	Betaproteobacteriales	SC-I-84	unclassified	cast
ASV2808	Proteobacteria	Gammaproteobacteria	Betaproteobacteriales	SC-I-84	unclassified	cast
ASV3373	Proteobacteria	Gammaproteobacteria	Betaproteobacteriales	SC-I-84	unclassified	cast
ASV1445	Proteobacteria	Gammaproteobacteria	Betaproteobacteriales	SC-I-84	unclassified	cast
ASV4773	Proteobacteria	Gammaproteobacteria	Betaproteobacteriales	TRA3-20	unclassified	cast
ASV2104	Proteobacteria	Gammaproteobacteria	Betaproteobacteriales	TRA3-20	unclassified	cast
ASV152	Proteobacteria	Gammaproteobacteria	Betaproteobacteriales	Methylophilaceae	unclassified	cast
ASV2246	Proteobacteria	Gammaproteobacteria	Betaproteobacteriales	Methylophilaceae	Methylotenera	cast
ASV686	Proteobacteria	Gammaproteobacteria	Betaproteobacteriales	Methylophilaceae	Methylotenera	cast
ASV676	Proteobacteria	Gammaproteobacteria	Betaproteobacteriales	Nitrosomonadaceae	GOUTA6	cast
ASV5920	Proteobacteria	Gammaproteobacteria	Betaproteobacteriales	Nitrosomonadaceae	GOUTA6	cast
ASV472	Proteobacteria	Gammaproteobacteria	Betaproteobacteriales	Nitrosomonadaceae	MND1	cast
ASV4115	Proteobacteria	Gammaproteobacteria	Betaproteobacteriales	Nitrosomonadaceae	MND1	cast
ASV1695	Proteobacteria	Gammaproteobacteria	Betaproteobacteriales	Nitrosomonadaceae	MND1	cast
ASV5183	Proteobacteria	Gammaproteobacteria	Betaproteobacteriales	Burkholderiaceae	Achromobacter	cast
ASV431	Proteobacteria	Gammaproteobacteria	Betaproteobacteriales	Chitinibacteraceae	Chitinibacter	cast
ASV4804	Proteobacteria	Gammaproteobacteria	Betaproteobacteriales	Burkholderiaceae	Mycoavidus	cast
ASV279	Proteobacteria	Gammaproteobacteria	Betaproteobacteriales	Burkholderiaceae	Massilia	cast
ASV237	Proteobacteria	Gammaproteobacteria	Betaproteobacteriales	Burkholderiaceae	Massilia	cast
ASV853	Proteobacteria	Gammaproteobacteria	Betaproteobacteriales	Burkholderiaceae	Massilia	cast
ASV297	Proteobacteria	Gammaproteobacteria	Betaproteobacteriales	Burkholderiaceae	Massilia	cast
ASV392	Proteobacteria	Gammaproteobacteria	Betaproteobacteriales	Burkholderiaceae	Massilia	cast
ASV1196	Proteobacteria	Gammaproteobacteria	Betaproteobacteriales	Burkholderiaceae	Duganella	cast
ASV3376	Proteobacteria	Gammaproteobacteria	Betaproteobacteriales	Burkholderiaceae	Burkholderia-Caballeronia-Paraburkholderia	cast
ASV214	Proteobacteria	Gammaproteobacteria	Betaproteobacteriales	unclassified	unclassified	cast
ASV418	Proteobacteria	Gammaproteobacteria	Betaproteobacteriales	unclassified	unclassified	cast
ASV3935	Proteobacteria	Gammaproteobacteria	Betaproteobacteriales	Rhodocyclaceae	Dechloromonas	cast
ASV900	Proteobacteria	Gammaproteobacteria	Betaproteobacteriales	Rhodocyclaceae	Niveibacterium	cast
ASV1261	Proteobacteria	Gammaproteobacteria	Betaproteobacteriales	Nitrosomonadaceae	Ellin6067	cast
ASV516	Proteobacteria	Gammaproteobacteria	Betaproteobacteriales	Nitrosomonadaceae	Ellin6067	cast
ASV3029	Proteobacteria	Gammaproteobacteria	Betaproteobacteriales	Nitrosomonadaceae	Ellin6067	cast
ASV4449	Proteobacteria	Alphaproteobacteria	Dongiales	Dongiaceae	Dongia	cast
ASV1299	Proteobacteria	Alphaproteobacteria	Dongiales	Dongiaceae	Dongia	cast
ASV2642	Proteobacteria	Alphaproteobacteria	Dongiales	Dongiaceae	Dongia	cast
ASV1004	Proteobacteria	Alphaproteobacteria	Dongiales	Dongiaceae	Dongia	cast
ASV3946	Proteobacteria	Alphaproteobacteria	Elsterales	unclassified	unclassified	cast
ASV983	Proteobacteria	Alphaproteobacteria	Elsterales	unclassified	unclassified	cast
ASV835	Proteobacteria	Alphaproteobacteria	Elsterales	unclassified	unclassified	cast
ASV679	Proteobacteria	Alphaproteobacteria	Elsterales	unclassified	unclassified	cast
ASV6243	Proteobacteria	Alphaproteobacteria	Elsterales	unclassified	unclassified	cast
ASV3251	Proteobacteria	Alphaproteobacteria	Elsterales	unclassified	unclassified	cast
ASV329	Proteobacteria	Alphaproteobacteria	Elsterales	unclassified	unclassified	cast
ASV1056	Proteobacteria	Alphaproteobacteria	Elsterales	unclassified	unclassified	cast
ASV1200	Proteobacteria	Alphaproteobacteria	Elsterales	unclassified	unclassified	cast
ASV6068	Proteobacteria	Alphaproteobacteria	Elsterales	unclassified	unclassified	cast
ASV5035	Proteobacteria	Alphaproteobacteria	Elsterales	unclassified	unclassified	cast
ASV6061	Proteobacteria	Alphaproteobacteria	Tistrellales	Geminicoccaceae	Candidatus_Alysiosphaera	cast
ASV2337	Proteobacteria	Deltaproteobacteria	Myxococcales	BIrii41	unclassified	cast
ASV5861	Proteobacteria	Deltaproteobacteria	unclassified	unclassified	unclassified	cast
ASV5404	Proteobacteria	Alphaproteobacteria	Reyranellales	Reyranellaceae	Reyranella	cast
ASV1496	Proteobacteria	Alphaproteobacteria	Reyranellales	Reyranellaceae	Reyranella	cast
ASV3133	Proteobacteria	Alphaproteobacteria	Reyranellales	Reyranellaceae	Reyranella	cast
ASV3781	Proteobacteria	Alphaproteobacteria	Reyranellales	Reyranellaceae	Reyranella	cast
ASV1284	Proteobacteria	Alphaproteobacteria	Reyranellales	Reyranellaceae	Reyranella	cast
ASV4798	Proteobacteria	Alphaproteobacteria	Reyranellales	Reyranellaceae	Reyranella	cast
ASV1623	Proteobacteria	Alphaproteobacteria	Reyranellales	Reyranellaceae	Reyranella	cast
ASV4724	Proteobacteria	Alphaproteobacteria	Reyranellales	Reyranellaceae	Reyranella	cast
ASV4010	Proteobacteria	Alphaproteobacteria	Caulobacterales	Caulobacteraceae	unclassified	cast
ASV4112	Proteobacteria	Alphaproteobacteria	Caulobacterales	Caulobacteraceae	unclassified	cast
ASV3630	Proteobacteria	Alphaproteobacteria	Caulobacterales	Caulobacteraceae	Phenylobacterium	cast
ASV777	Proteobacteria	Alphaproteobacteria	Caulobacterales	Caulobacteraceae	Phenylobacterium	cast
ASV1567	Proteobacteria	Alphaproteobacteria	Rhizobiales	Beijerinckiaceae	Roseiarcus	cast
ASV515	Proteobacteria	Alphaproteobacteria	Rhizobiales	Beijerinckiaceae	Roseiarcus	cast
ASV1216	Proteobacteria	Alphaproteobacteria	Rhizobiales	Beijerinckiaceae	unclassified	cast
ASV5542	Proteobacteria	Alphaproteobacteria	Rhizobiales	Beijerinckiaceae	unclassified	cast
ASV1741	Proteobacteria	Alphaproteobacteria	Rhizobiales	Rhizobiales_Incertae_Sedis	Alsobacter	cast
ASV1428	Proteobacteria	Alphaproteobacteria	Rhizobiales	unclassified	unclassified	cast
ASV655	Proteobacteria	Alphaproteobacteria	Rhizobiales	Xanthobacteraceae	Pseudolabrys	cast
ASV910	Proteobacteria	Alphaproteobacteria	Rhizobiales	Xanthobacteraceae	Pseudolabrys	cast
ASV3026	Proteobacteria	Alphaproteobacteria	Rhizobiales	Xanthobacteraceae	Pseudolabrys	cast
ASV3677	Proteobacteria	Alphaproteobacteria	Rhizobiales	Xanthobacteraceae	unclassified	cast
ASV791	Proteobacteria	Alphaproteobacteria	Rhizobiales	Xanthobacteraceae	unclassified	cast
ASV1215	Proteobacteria	Alphaproteobacteria	Rhizobiales	Beijerinckiaceae	Bosea	cast
ASV5848	Proteobacteria	Alphaproteobacteria	Rhizobiales	Beijerinckiaceae	unclassified	cast
ASV1553	Proteobacteria	Alphaproteobacteria	Rhizobiales	Beijerinckiaceae	Microvirga	cast
ASV3030	Proteobacteria	Alphaproteobacteria	Parvibaculales	Parvibaculaceae	Parvibaculum	cast
ASV4110	Proteobacteria	Alphaproteobacteria	Rhodobacterales	Rhodobacteraceae	unclassified	cast
ASV523	Proteobacteria	Alphaproteobacteria	Rhodobacterales	Rhodobacteraceae	unclassified	cast
ASV1488	Proteobacteria	Alphaproteobacteria	Rhodobacterales	Rhodobacteraceae	unclassified	cast
ASV4114	Proteobacteria	Alphaproteobacteria	Rhodobacterales	Rhodobacteraceae	unclassified	cast
ASV5660	Proteobacteria	Alphaproteobacteria	Rhodobacterales	Rhodobacteraceae	Paracoccus	cast
ASV4722	Proteobacteria	Alphaproteobacteria	Rhizobiales	Rhodomicrobiaceae	Rhodomicrobium	cast
ASV4960	Proteobacteria	Alphaproteobacteria	Rhizobiales	Kaistiaceae	Kaistia	cast
ASV5163	Proteobacteria	Alphaproteobacteria	Rhizobiales	Kaistiaceae	Kaistia	cast
ASV4207	Proteobacteria	Alphaproteobacteria	Rhizobiales	Hyphomicrobiaceae	Hyphomicrobium	cast
ASV1287	Proteobacteria	Alphaproteobacteria	Rhizobiales	unclassified	unclassified	cast
ASV838	Proteobacteria	Alphaproteobacteria	Rhizobiales	unclassified	unclassified	cast
ASV2241	Proteobacteria	Alphaproteobacteria	Rhizobiales	unclassified	unclassified	cast
ASV2762	Proteobacteria	Alphaproteobacteria	Rhizobiales	Rhizobiaceae	Pseudochrobactrum	cast
ASV851	Proteobacteria	Alphaproteobacteria	Rhizobiales	Rhizobiaceae	unclassified	cast
ASV2682	Proteobacteria	Alphaproteobacteria	Rhizobiales	Rhizobiaceae	unclassified	cast
ASV2088	Proteobacteria	Alphaproteobacteria	Sphingomonadales	Sphingomonadaceae	Altererythrobacter	cast
ASV1156	Proteobacteria	Alphaproteobacteria	Sphingomonadales	Sphingomonadaceae	Novosphingobium	cast
ASV2763	Proteobacteria	Alphaproteobacteria	Sphingomonadales	Sphingomonadaceae	Novosphingobium	cast
ASV1924	Proteobacteria	Alphaproteobacteria	Sphingomonadales	Sphingomonadaceae	Novosphingobium	cast
ASV2966	Proteobacteria	Alphaproteobacteria	Sphingomonadales	Sphingomonadaceae	Novosphingobium	cast
ASV3375	Proteobacteria	Alphaproteobacteria	Sphingomonadales	Sphingomonadaceae	Novosphingobium	cast
ASV522	Proteobacteria	Alphaproteobacteria	Sphingomonadales	Sphingomonadaceae	Novosphingobium	cast
ASV1605	Proteobacteria	Alphaproteobacteria	Sphingomonadales	Sphingomonadaceae	Novosphingobium	cast
ASV1549	Proteobacteria	Alphaproteobacteria	Sphingomonadales	Sphingomonadaceae	Sphingomonas	cast
ASV1426	Proteobacteria	Alphaproteobacteria	Sphingomonadales	Sphingomonadaceae	Sphingomonas	cast
ASV5219	Proteobacteria	Alphaproteobacteria	Sphingomonadales	Sphingomonadaceae	Sphingomonas	cast
ASV1825	Proteobacteria	Alphaproteobacteria	Sphingomonadales	Sphingomonadaceae	unclassified	cast
ASV684	Proteobacteria	Alphaproteobacteria	Sphingomonadales	Sphingomonadaceae	unclassified	cast
ASV1724	Proteobacteria	Alphaproteobacteria	Sphingomonadales	Sphingomonadaceae	unclassified	cast
ASV1692	Proteobacteria	Alphaproteobacteria	Sphingomonadales	Sphingomonadaceae	Polymorphobacter	cast
ASV816	Proteobacteria	Alphaproteobacteria	Sphingomonadales	Sphingomonadaceae	Polymorphobacter	cast
ASV1145	Proteobacteria	Alphaproteobacteria	Sphingomonadales	Sphingomonadaceae	Polymorphobacter	cast
ASV3363	Proteobacteria	Alphaproteobacteria	Sphingomonadales	Sphingomonadaceae	unclassified	cast
ASV3023	Proteobacteria	Alphaproteobacteria	Micropepsales	Micropepsaceae	unclassified	cast
ASV4116	Proteobacteria	Alphaproteobacteria	Micropepsales	Micropepsaceae	unclassified	cast
ASV4992	Proteobacteria	Alphaproteobacteria	Azospirillales	Inquilinaceae	Inquilinus	cast
ASV3947	Proteobacteria	Alphaproteobacteria	Azospirillales	Inquilinaceae	Inquilinus	cast
ASV4956	Proteobacteria	Alphaproteobacteria	unclassified	unclassified	unclassified	cast
ASV272	Proteobacteria	Alphaproteobacteria	unclassified	unclassified	unclassified	cast
ASV1264	Proteobacteria	Alphaproteobacteria	Acetobacterales	Acetobacteraceae	unclassified	cast
ASV2082	Proteobacteria	Alphaproteobacteria	Acetobacterales	Acetobacteraceae	unclassified	cast
ASV5866	Proteobacteria	Alphaproteobacteria	Acetobacterales	Acetobacteraceae	Acidocella	cast
ASV4747	Proteobacteria	Alphaproteobacteria	Acetobacterales	Acetobacteraceae	unclassified	cast
ASV776	Proteobacteria	Alphaproteobacteria	Acetobacterales	Acetobacteraceae	unclassified	cast
ASV761	Proteobacteria	Alphaproteobacteria	Acetobacterales	Acetobacteraceae	Acidiphilium	cast
ASV1233	Proteobacteria	Alphaproteobacteria	Acetobacterales	Acetobacteraceae	unclassified	cast
ASV1172	Proteobacteria	Alphaproteobacteria	Acetobacterales	Acetobacteraceae	unclassified	cast
ASV5021	Proteobacteria	Alphaproteobacteria	Acetobacterales	Acetobacteraceae	Roseococcus	cast
ASV5721	Proteobacteria	Alphaproteobacteria	Paracaedibacterales	Paracaedibacteraceae	unclassified	cast
ASV3858	Proteobacteria	Alphaproteobacteria	Paracaedibacterales	Paracaedibacteraceae	unclassified	cast
ASV4011	Proteobacteria	Alphaproteobacteria	unclassified	unclassified	unclassified	cast
ASV3186	Proteobacteria	Alphaproteobacteria	Holosporales	Holosporaceae	unclassified	cast
ASV1347	Proteobacteria	Alphaproteobacteria	Holosporales	Holosporaceae	unclassified	cast
ASV5693	Proteobacteria	Deltaproteobacteria	Bdellovibrionales	Bdellovibrionaceae	Bdellovibrio	cast
ASV5483	Proteobacteria	Deltaproteobacteria	Bdellovibrionales	Bdellovibrionaceae	Bdellovibrio	cast
ASV6254	Proteobacteria	Deltaproteobacteria	Bdellovibrionales	Bdellovibrionaceae	Bdellovibrio	cast
ASV1591	Proteobacteria	Deltaproteobacteria	Bdellovibrionales	Bdellovibrionaceae	Bdellovibrio	cast
ASV2269	Proteobacteria	Deltaproteobacteria	Bdellovibrionales	Bdellovibrionaceae	Bdellovibrio	cast
ASV5876	Proteobacteria	Deltaproteobacteria	Bdellovibrionales	Bdellovibrionaceae	Bdellovibrio	cast
ASV6248	Proteobacteria	Deltaproteobacteria	Bdellovibrionales	Bdellovibrionaceae	Bdellovibrio	cast
ASV6356	Planctomycetes	vadinHA49	unclassified	unclassified	unclassified	cast
ASV1589	Planctomycetes	vadinHA49	unclassified	unclassified	unclassified	cast
ASV2213	Planctomycetes	vadinHA49	unclassified	unclassified	unclassified	cast
ASV5295	Planctomycetes	vadinHA49	unclassified	unclassified	unclassified	cast
ASV4957	Planctomycetes	vadinHA49	unclassified	unclassified	unclassified	cast
ASV4728	Planctomycetes	vadinHA49	unclassified	unclassified	unclassified	cast
ASV6293	Chlamydiae	Chlamydiae	Chlamydiales	unclassified	unclassified	cast
ASV5165	Chlamydiae	Chlamydiae	Chlamydiales	Parachlamydiaceae	unclassified	cast
ASV6362	Chlamydiae	Chlamydiae	Chlamydiales	Parachlamydiaceae	unclassified	cast
ASV6355	Chlamydiae	Chlamydiae	Chlamydiales	unclassified	unclassified	cast
ASV5863	Chlamydiae	Chlamydiae	Chlamydiales	Parachlamydiaceae	Neochlamydia	cast
ASV6279	Chlamydiae	Chlamydiae	Chlamydiales	Parachlamydiaceae	unclassified	cast
ASV752	Bacteroidetes	Bacteroidia	Sphingobacteriales	Sphingobacteriaceae	Mucilaginibacter	cast
ASV1489	Bacteroidetes	Bacteroidia	Sphingobacteriales	Sphingobacteriaceae	Mucilaginibacter	cast
ASV3717	Bacteroidetes	Bacteroidia	Sphingobacteriales	Sphingobacteriaceae	Mucilaginibacter	cast
ASV1344	Bacteroidetes	Bacteroidia	Sphingobacteriales	Sphingobacteriaceae	unclassified	cast
ASV1158	Bacteroidetes	Bacteroidia	Sphingobacteriales	NS11-12_marine_group	unclassified	cast
ASV906	Bacteroidetes	Bacteroidia	Sphingobacteriales	NS11-12_marine_group	unclassified	cast
ASV4730	Bacteroidetes	Bacteroidia	Sphingobacteriales	NS11-12_marine_group	unclassified	cast
ASV1406	Bacteroidetes	Bacteroidia	Chitinophagales	Chitinophagaceae	unclassified	cast
ASV435	Bacteroidetes	Bacteroidia	Chitinophagales	Chitinophagaceae	unclassified	cast
ASV1195	Bacteroidetes	Bacteroidia	Chitinophagales	Chitinophagaceae	unclassified	cast
ASV3802	Bacteroidetes	Bacteroidia	Chitinophagales	Chitinophagaceae	unclassified	cast
ASV4521	Bacteroidetes	Bacteroidia	Chitinophagales	Chitinophagaceae	unclassified	cast
ASV5685	Bacteroidetes	Bacteroidia	Chitinophagales	Chitinophagaceae	unclassified	cast
ASV3941	Bacteroidetes	Bacteroidia	Chitinophagales	Chitinophagaceae	unclassified	cast
ASV970	Bacteroidetes	Bacteroidia	Chitinophagales	Chitinophagaceae	unclassified	cast
ASV1290	Bacteroidetes	Bacteroidia	Chitinophagales	Chitinophagaceae	unclassified	cast
ASV1412	Bacteroidetes	Bacteroidia	Chitinophagales	Chitinophagaceae	unclassified	cast
ASV2508	Bacteroidetes	Bacteroidia	Chitinophagales	Chitinophagaceae	unclassified	cast
ASV2815	Bacteroidetes	Bacteroidia	Chitinophagales	Chitinophagaceae	unclassified	cast
ASV2181	Bacteroidetes	Bacteroidia	Chitinophagales	Chitinophagaceae	unclassified	cast
ASV1070	Bacteroidetes	Bacteroidia	Chitinophagales	Chitinophagaceae	unclassified	cast
ASV1120	Bacteroidetes	Bacteroidia	Chitinophagales	Chitinophagaceae	unclassified	cast
ASV1128	Bacteroidetes	Bacteroidia	Chitinophagales	Chitinophagaceae	unclassified	cast
ASV1080	Bacteroidetes	Bacteroidia	Chitinophagales	Chitinophagaceae	Parafilimonas	cast
ASV1000	Bacteroidetes	Bacteroidia	Chitinophagales	Chitinophagaceae	Parafilimonas	cast
ASV589	Bacteroidetes	Bacteroidia	Chitinophagales	Chitinophagaceae	Parafilimonas	cast
ASV2271	Bacteroidetes	Bacteroidia	Chitinophagales	Chitinophagaceae	unclassified	cast
ASV4523	Bacteroidetes	Bacteroidia	Chitinophagales	Chitinophagaceae	unclassified	cast
ASV4941	Bacteroidetes	Bacteroidia	Chitinophagales	Chitinophagaceae	unclassified	cast
ASV3463	Bacteroidetes	Bacteroidia	Chitinophagales	Chitinophagaceae	unclassified	cast
ASV698	Bacteroidetes	Bacteroidia	Chitinophagales	Chitinophagaceae	unclassified	cast
ASV3505	Bacteroidetes	Bacteroidia	Chitinophagales	Chitinophagaceae	unclassified	cast
ASV826	Bacteroidetes	Bacteroidia	Chitinophagales	Chitinophagaceae	unclassified	cast
ASV1875	Bacteroidetes	Bacteroidia	Chitinophagales	Chitinophagaceae	unclassified	cast
ASV4869	Bacteroidetes	Bacteroidia	Chitinophagales	Chitinophagaceae	Flavihumibacter	cast
ASV233	Bacteroidetes	Bacteroidia	Chitinophagales	Chitinophagaceae	unclassified	cast
ASV2863	Bacteroidetes	Bacteroidia	Chitinophagales	Chitinophagaceae	Segetibacter	cast
ASV2546	Bacteroidetes	Bacteroidia	Chitinophagales	Chitinophagaceae	Segetibacter	cast
ASV5387	Bacteroidetes	Bacteroidia	Chitinophagales	Chitinophagaceae	Segetibacter	cast
ASV4293	Bacteroidetes	Bacteroidia	Chitinophagales	Chitinophagaceae	Segetibacter	cast
ASV1956	Bacteroidetes	Bacteroidia	Chitinophagales	Chitinophagaceae	Segetibacter	cast
ASV1231	Bacteroidetes	Bacteroidia	Chitinophagales	Chitinophagaceae	Ferruginibacter	cast
ASV439	Bacteroidetes	Bacteroidia	Chitinophagales	Chitinophagaceae	Ferruginibacter	cast
ASV5704	Bacteroidetes	Bacteroidia	Chitinophagales	Chitinophagaceae	Ferruginibacter	cast
ASV4244	Bacteroidetes	Bacteroidia	Chitinophagales	Chitinophagaceae	Ferruginibacter	cast
ASV606	Bacteroidetes	Bacteroidia	Chitinophagales	Chitinophagaceae	Ferruginibacter	cast
ASV3600	Bacteroidetes	Bacteroidia	Chitinophagales	Chitinophagaceae	Ferruginibacter	cast
ASV2967	Bacteroidetes	Bacteroidia	Chitinophagales	Chitinophagaceae	Ferruginibacter	cast
ASV5187	Bacteroidetes	Bacteroidia	Chitinophagales	Chitinophagaceae	Ferruginibacter	cast
ASV5407	Bacteroidetes	Bacteroidia	Chitinophagales	Chitinophagaceae	unclassified	cast
ASV2415	Bacteroidetes	Bacteroidia	Chitinophagales	Chitinophagaceae	unclassified	cast
ASV2724	Bacteroidetes	Bacteroidia	Chitinophagales	Chitinophagaceae	Terrimonas	cast
ASV3436	Bacteroidetes	Bacteroidia	Chitinophagales	Chitinophagaceae	Terrimonas	cast
ASV1405	Bacteroidetes	Bacteroidia	Chitinophagales	Chitinophagaceae	unclassified	cast
ASV1192	Bacteroidetes	Bacteroidia	Chitinophagales	Chitinophagaceae	unclassified	cast
ASV6435	Bacteroidetes	Bacteroidia	Chitinophagales	Chitinophagaceae	unclassified	cast
ASV1463	Bacteroidetes	Bacteroidia	Chitinophagales	Chitinophagaceae	Flavisolibacter	cast
ASV668	Bacteroidetes	Bacteroidia	Chitinophagales	Chitinophagaceae	Flavisolibacter	cast
ASV5491	Bacteroidetes	Bacteroidia	Chitinophagales	Chitinophagaceae	unclassified	cast
ASV2641	Bacteroidetes	Bacteroidia	Chitinophagales	Chitinophagaceae	unclassified	cast
ASV593	Bacteroidetes	Bacteroidia	Chitinophagales	Chitinophagaceae	unclassified	cast
ASV5411	Bacteroidetes	Bacteroidia	Chitinophagales	Chitinophagaceae	unclassified	cast
ASV476	Bacteroidetes	Bacteroidia	Chitinophagales	Chitinophagaceae	Filimonas	cast
ASV1790	Bacteroidetes	Bacteroidia	Chitinophagales	37-13	unclassified	cast
ASV6259	Bacteroidetes	Bacteroidia	Flavobacteriales	Flavobacteriaceae	Flavobacterium	cast
ASV2504	Bacteroidetes	Bacteroidia	Flavobacteriales	Flavobacteriaceae	Flavobacterium	cast
ASV39	Bacteroidetes	Bacteroidia	Flavobacteriales	Flavobacteriaceae	Flavobacterium	cast
ASV1809	Bacteroidetes	Bacteroidia	Flavobacteriales	Flavobacteriaceae	Flavobacterium	cast
ASV2039	Bacteroidetes	Bacteroidia	Flavobacteriales	Flavobacteriaceae	Flavobacterium	cast
ASV925	Bacteroidetes	Bacteroidia	Flavobacteriales	Flavobacteriaceae	Flavobacterium	cast
ASV2728	Bacteroidetes	Bacteroidia	Flavobacteriales	Flavobacteriaceae	Flavobacterium	cast
ASV1012	Bacteroidetes	Bacteroidia	Flavobacteriales	Flavobacteriaceae	Flavobacterium	cast
ASV434	Bacteroidetes	Bacteroidia	Flavobacteriales	Flavobacteriaceae	Flavobacterium	cast
ASV106	Bacteroidetes	Bacteroidia	Flavobacteriales	Flavobacteriaceae	Flavobacterium	cast
ASV969	Bacteroidetes	Bacteroidia	Flavobacteriales	Flavobacteriaceae	Flavobacterium	cast
ASV355	Bacteroidetes	Bacteroidia	Flavobacteriales	Flavobacteriaceae	Flavobacterium	cast
ASV1157	Bacteroidetes	Bacteroidia	Flavobacteriales	Flavobacteriaceae	Flavobacterium	cast
ASV1831	Bacteroidetes	Bacteroidia	Flavobacteriales	Flavobacteriaceae	Flavobacterium	cast
ASV398	Bacteroidetes	Bacteroidia	Flavobacteriales	Flavobacteriaceae	Flavobacterium	cast
ASV548	Bacteroidetes	Bacteroidia	Flavobacteriales	Flavobacteriaceae	Flavobacterium	cast
ASV28	Bacteroidetes	Bacteroidia	Flavobacteriales	Flavobacteriaceae	Flavobacterium	cast
ASV24	Bacteroidetes	Bacteroidia	Flavobacteriales	Flavobacteriaceae	Flavobacterium	cast
ASV1088	Bacteroidetes	Bacteroidia	Flavobacteriales	Flavobacteriaceae	Flavobacterium	cast
ASV1084	Bacteroidetes	Bacteroidia	Flavobacteriales	Flavobacteriaceae	Flavobacterium	cast
ASV361	Bacteroidetes	Bacteroidia	Flavobacteriales	Flavobacteriaceae	Flavobacterium	cast
ASV201	Bacteroidetes	Bacteroidia	Flavobacteriales	Flavobacteriaceae	Flavobacterium	cast
ASV223	Bacteroidetes	Bacteroidia	Flavobacteriales	Flavobacteriaceae	Flavobacterium	cast
ASV57	Bacteroidetes	Bacteroidia	Flavobacteriales	Flavobacteriaceae	Flavobacterium	cast
ASV241	Bacteroidetes	Bacteroidia	Flavobacteriales	Flavobacteriaceae	Flavobacterium	cast
ASV8	Bacteroidetes	Bacteroidia	Flavobacteriales	Flavobacteriaceae	Flavobacterium	cast
ASV486	Bacteroidetes	Bacteroidia	Flavobacteriales	Flavobacteriaceae	Flavobacterium	cast
ASV588	Bacteroidetes	Bacteroidia	Flavobacteriales	Flavobacteriaceae	Flavobacterium	cast
ASV4574	Bacteroidetes	Bacteroidia	Flavobacteriales	Flavobacteriaceae	Flavobacterium	cast
ASV942	Bacteroidetes	Bacteroidia	Flavobacteriales	Flavobacteriaceae	Flavobacterium	cast
ASV718	Bacteroidetes	Bacteroidia	Flavobacteriales	Flavobacteriaceae	Flavobacterium	cast
ASV360	Bacteroidetes	Bacteroidia	Flavobacteriales	Flavobacteriaceae	Flavobacterium	cast
ASV3226	Bacteroidetes	Bacteroidia	Flavobacteriales	Flavobacteriaceae	Flavobacterium	cast
ASV179	Bacteroidetes	Bacteroidia	Flavobacteriales	Flavobacteriaceae	Flavobacterium	cast
ASV621	Bacteroidetes	Bacteroidia	Flavobacteriales	Flavobacteriaceae	Flavobacterium	cast
ASV813	Bacteroidetes	Bacteroidia	Flavobacteriales	Flavobacteriaceae	Flavobacterium	cast
ASV2810	Bacteroidetes	Bacteroidia	Flavobacteriales	Flavobacteriaceae	Flavobacterium	cast
ASV670	Bacteroidetes	Bacteroidia	Flavobacteriales	Flavobacteriaceae	Flavobacterium	cast
ASV469	Bacteroidetes	Bacteroidia	Flavobacteriales	Flavobacteriaceae	Flavobacterium	cast
ASV2203	Bacteroidetes	Bacteroidia	Flavobacteriales	Flavobacteriaceae	Flavobacterium	cast
ASV1364	Bacteroidetes	Bacteroidia	Flavobacteriales	Flavobacteriaceae	Flavobacterium	cast
ASV1176	Bacteroidetes	Bacteroidia	Flavobacteriales	Flavobacteriaceae	Flavobacterium	cast
ASV2640	Bacteroidetes	Bacteroidia	Flavobacteriales	Flavobacteriaceae	Flavobacterium	cast
ASV964	Bacteroidetes	Bacteroidia	Flavobacteriales	Flavobacteriaceae	Flavobacterium	cast
ASV1308	Bacteroidetes	Bacteroidia	Flavobacteriales	Flavobacteriaceae	Flavobacterium	cast
ASV6251	Bacteroidetes	Bacteroidia	Flavobacteriales	Weeksellaceae	Chryseobacterium	cast
ASV4307	Bacteroidetes	Bacteroidia	Sphingobacteriales	unclassified	unclassified	cast
ASV6069	Bacteroidetes	Bacteroidia	Sphingobacteriales	AKYH767	unclassified	cast
ASV502	Bacteroidetes	Bacteroidia	Sphingobacteriales	unclassified	unclassified	cast
ASV847	Bacteroidetes	Bacteroidia	Sphingobacteriales	Sphingobacteriaceae	Solitalea	cast
ASV5961	Bacteroidetes	Bacteroidia	Sphingobacteriales	unclassified	unclassified	cast
ASV3962	Bacteroidetes	Bacteroidia	Sphingobacteriales	AKYH767	unclassified	cast
ASV831	Bacteroidetes	Bacteroidia	Flavobacteriales	NS9_marine_group	unclassified	cast
ASV1326	Bacteroidetes	Bacteroidia	Sphingobacteriales	KD3-93	unclassified	cast
ASV172	Bacteroidetes	Bacteroidia	Cytophagales	Spirosomaceae	Dyadobacter	cast
ASV5649	Bacteroidetes	Bacteroidia	Cytophagales	Spirosomaceae	unclassified	cast
ASV6097	Bacteroidetes	Bacteroidia	Cytophagales	Microscillaceae	unclassified	cast
ASV4736	Bacteroidetes	Bacteroidia	Cytophagales	Cytophagaceae	Cytophaga	cast
ASV4526	Bacteroidetes	Bacteroidia	Cytophagales	Microscillaceae	unclassified	cast
ASV3641	Bacteroidetes	Bacteroidia	Cytophagales	Microscillaceae	Ohtaekwangia	cast
ASV5746	Bacteroidetes	Bacteroidia	Cytophagales	Microscillaceae	Ohtaekwangia	cast
ASV4720	Bacteroidetes	Bacteroidia	Cytophagales	Microscillaceae	Chryseolinea	cast
ASV2541	Bacteroidetes	Bacteroidia	Cytophagales	Microscillaceae	unclassified	cast
ASV1881	Bacteroidetes	Bacteroidia	Cytophagales	Microscillaceae	unclassified	cast
ASV1173	Bacteroidetes	Bacteroidia	Cytophagales	Microscillaceae	unclassified	cast
ASV493	Bacteroidetes	Bacteroidia	Cytophagales	Microscillaceae	unclassified	cast
ASV3887	Bacteroidetes	Bacteroidia	Cytophagales	Microscillaceae	unclassified	cast
ASV597	Bacteroidetes	Bacteroidia	Cytophagales	Microscillaceae	unclassified	cast
ASV3139	Bacteroidetes	Bacteroidia	Cytophagales	Microscillaceae	unclassified	cast
ASV1318	Bacteroidetes	Bacteroidia	Cytophagales	Microscillaceae	Chryseolinea	cast
ASV3538	Bacteroidetes	Bacteroidia	Cytophagales	Microscillaceae	Chryseolinea	cast
ASV2919	Bacteroidetes	Bacteroidia	Cytophagales	Microscillaceae	OLB12	cast
ASV658	Bacteroidetes	Bacteroidia	Cytophagales	Microscillaceae	OLB12	cast
ASV3716	Bacteroidetes	Bacteroidia	Cytophagales	Cytophagaceae	Cytophaga	cast
ASV1928	Bacteroidetes	Bacteroidia	Cytophagales	Cytophagaceae	Sporocytophaga	cast
ASV3138	Bacteroidetes	Bacteroidia	Cytophagales	Cytophagaceae	Sporocytophaga	cast
ASV914	Bacteroidetes	Bacteroidia	Cytophagales	Cytophagaceae	Cytophaga	cast
ASV709	Bacteroidetes	Bacteroidia	Cytophagales	Cyclobacteriaceae	unclassified	cast
ASV207	Bacteroidetes	Bacteroidia	Cytophagales	Cytophagaceae	Cytophaga	cast
ASV1163	Bacteroidetes	Bacteroidia	Cytophagales	Cytophagaceae	Cytophaga	cast
ASV1443	Bacteroidetes	Bacteroidia	Cytophagales	Cytophagaceae	Cytophaga	cast
ASV979	Bacteroidetes	Bacteroidia	Cytophagales	Cytophagaceae	Cytophaga	cast
ASV5508	Bacteroidetes	Bacteroidia	Cytophagales	Cytophagaceae	unclassified	cast
ASV1274	Bacteroidetes	Bacteroidia	Cytophagales	Cytophagaceae	Cytophaga	cast
ASV869	Bacteroidetes	Bacteroidia	Cytophagales	Cytophagaceae	unclassified	cast
ASV586	Bacteroidetes	Bacteroidia	Cytophagales	Cytophagaceae	unclassified	cast
ASV1982	Bacteroidetes	Bacteroidia	Cytophagales	Cytophagaceae	unclassified	cast
ASV1060	Bacteroidetes	Bacteroidia	Cytophagales	Cytophagaceae	unclassified	cast
ASV3438	Bacteroidetes	Bacteroidia	Cytophagales	Cytophagaceae	unclassified	cast
ASV2417	Bacteroidetes	Bacteroidia	Cytophagales	Cytophagaceae	Cytophaga	cast
ASV4113	Bacteroidetes	Bacteroidia	Cytophagales	Hymenobacteraceae	Adhaeribacter	cast
ASV2476	Bacteroidetes	Bacteroidia	Cytophagales	Hymenobacteraceae	Adhaeribacter	cast
ASV891	Bacteroidetes	Bacteroidia	Cytophagales	Hymenobacteraceae	Adhaeribacter	cast
ASV2637	Bacteroidetes	Bacteroidia	Cytophagales	Cytophagaceae	Sporocytophaga	cast
ASV3374	Bacteroidetes	Bacteroidia	Cytophagales	Cytophagaceae	Sporocytophaga	cast
ASV3931	Bacteroidetes	Ignavibacteria	SJA-28	unclassified	unclassified	cast
ASV5648	Firmicutes	unclassified	unclassified	unclassified	unclassified	cast
ASV5638	Cyanobacteria	Melainabacteria	Vampirovibrionales	unclassified	unclassified	cast
ASV5162	Cyanobacteria	Sericytochromatia	unclassified	unclassified	unclassified	cast
ASV5252	Cyanobacteria	Melainabacteria	Obscuribacterales	unclassified	unclassified	cast
ASV6245	Cyanobacteria	Melainabacteria	Obscuribacterales	unclassified	unclassified	cast
ASV4311	Cyanobacteria	Sericytochromatia	unclassified	unclassified	unclassified	cast
ASV1259	Firmicutes	Clostridia	Clostridiales	unclassified	unclassified	cast
ASV6107	FBP	unclassified	unclassified	unclassified	unclassified	cast
ASV3255	Firmicutes	Clostridia	Clostridiales	Clostridiaceae_1	Clostridium_sensu_stricto_12	cast
ASV1673	Fibrobacteres	Fibrobacteria	Fibrobacterales	Fibrobacteraceae	possible_genus_04	cast
ASV1622	Fibrobacteres	Fibrobacteria	Fibrobacterales	Fibrobacteraceae	possible_genus_04	cast
ASV4815	Dependentiae	Babeliae	Babeliales	Vermiphilaceae	unclassified	cast
ASV6142	Dependentiae	Babeliae	Babeliales	Vermiphilaceae	unclassified	cast
ASV5862	Dependentiae	Babeliae	Babeliales	unclassified	unclassified	cast
ASV6137	Dependentiae	Babeliae	Babeliales	UBA12409	unclassified	cast
ASV6122	Dependentiae	Babeliae	Babeliales	Babeliaceae	unclassified	cast
ASV6390	Dependentiae	Babeliae	Babeliales	Vermiphilaceae	unclassified	cast
ASV5865	Dependentiae	Babeliae	Babeliales	Vermiphilaceae	unclassified	cast
ASV5386	Dependentiae	Babeliae	Babeliales	Vermiphilaceae	unclassified	cast
ASV3508	Dependentiae	Babeliae	Babeliales	Vermiphilaceae	unclassified	cast
ASV6071	Patescibacteria	Saccharimonadia	Saccharimonadales	unclassified	unclassified	cast
ASV6373	Patescibacteria	Saccharimonadia	Saccharimonadales	unclassified	unclassified	cast
ASV5481	Patescibacteria	Saccharimonadia	Saccharimonadales	unclassified	unclassified	cast
ASV5423	Patescibacteria	Saccharimonadia	Saccharimonadales	unclassified	unclassified	cast
ASV6053	Patescibacteria	Saccharimonadia	Saccharimonadales	unclassified	unclassified	cast
ASV6369	Proteobacteria	unclassified	unclassified	unclassified	unclassified	cast
ASV6247	Proteobacteria	unclassified	unclassified	unclassified	unclassified	cast
ASV4575	Elusimicrobia	Lineage_IIa	unclassified	unclassified	unclassified	cast
ASV4117	Elusimicrobia	Lineage_IIb	unclassified	unclassified	unclassified	cast
ASV6285	Elusimicrobia	Lineage_IIb	unclassified	unclassified	unclassified	cast
ASV3831	Elusimicrobia	Lineage_IIb	unclassified	unclassified	unclassified	cast
ASV6263	Elusimicrobia	Lineage_IIb	unclassified	unclassified	unclassified	cast
ASV6256	Elusimicrobia	Elusimicrobia	Lineage_IV	unclassified	unclassified	cast
ASV6262	Elusimicrobia	Elusimicrobia	Lineage_IV	unclassified	unclassified	cast
ASV2516	Verrucomicrobia	Verrucomicrobiae	Opitutales	Opitutaceae	Lacunisphaera	cast
ASV733	Verrucomicrobia	Verrucomicrobiae	Opitutales	Opitutaceae	Lacunisphaera	cast
ASV5643	Verrucomicrobia	Verrucomicrobiae	Opitutales	Opitutaceae	Lacunisphaera	cast
ASV1359	Verrucomicrobia	Verrucomicrobiae	Opitutales	Opitutaceae	Lacunisphaera	cast
ASV394	Verrucomicrobia	Verrucomicrobiae	Opitutales	Opitutaceae	IMCC26134	cast
ASV5409	Verrucomicrobia	Verrucomicrobiae	Opitutales	Opitutaceae	unclassified	cast
ASV828	Verrucomicrobia	Verrucomicrobiae	Opitutales	Opitutaceae	Opitutus	cast
ASV3705	Verrucomicrobia	Verrucomicrobiae	Opitutales	Opitutaceae	Opitutus	cast
ASV2216	Verrucomicrobia	Verrucomicrobiae	Opitutales	Opitutaceae	Opitutus	cast
ASV4735	Verrucomicrobia	Verrucomicrobiae	Pedosphaerales	Pedosphaeraceae	unclassified	cast
ASV3636	Verrucomicrobia	Verrucomicrobiae	Pedosphaerales	Pedosphaeraceae	unclassified	cast
ASV4801	Verrucomicrobia	Verrucomicrobiae	Pedosphaerales	Pedosphaeraceae	unclassified	cast
ASV2273	Verrucomicrobia	Verrucomicrobiae	Pedosphaerales	Pedosphaeraceae	unclassified	cast
ASV4525	Verrucomicrobia	Verrucomicrobiae	Pedosphaerales	Pedosphaeraceae	unclassified	cast
ASV4803	Verrucomicrobia	Verrucomicrobiae	Pedosphaerales	Pedosphaeraceae	unclassified	cast
ASV611	Verrucomicrobia	Verrucomicrobiae	Pedosphaerales	Pedosphaeraceae	unclassified	cast
ASV1615	Verrucomicrobia	Verrucomicrobiae	Pedosphaerales	Pedosphaeraceae	unclassified	cast
ASV2564	Verrucomicrobia	Verrucomicrobiae	Pedosphaerales	Pedosphaeraceae	unclassified	cast
ASV3832	Verrucomicrobia	Verrucomicrobiae	Pedosphaerales	Pedosphaeraceae	unclassified	cast
ASV2090	Verrucomicrobia	Verrucomicrobiae	Pedosphaerales	Pedosphaeraceae	unclassified	cast
ASV1403	Verrucomicrobia	Verrucomicrobiae	Pedosphaerales	Pedosphaeraceae	unclassified	cast
ASV2485	Verrucomicrobia	Verrucomicrobiae	Pedosphaerales	Pedosphaeraceae	unclassified	cast
ASV6447	Verrucomicrobia	Verrucomicrobiae	Pedosphaerales	Pedosphaeraceae	unclassified	cast
ASV1433	Verrucomicrobia	Verrucomicrobiae	Pedosphaerales	Pedosphaeraceae	unclassified	cast
ASV4940	Verrucomicrobia	Verrucomicrobiae	Pedosphaerales	Pedosphaeraceae	ADurb.Bin063-1	cast
ASV2388	Verrucomicrobia	Verrucomicrobiae	Pedosphaerales	Pedosphaeraceae	ADurb.Bin063-1	cast
ASV1234	Verrucomicrobia	Verrucomicrobiae	Pedosphaerales	Pedosphaeraceae	unclassified	cast
ASV4928	Verrucomicrobia	Verrucomicrobiae	Pedosphaerales	Pedosphaeraceae	unclassified	cast
ASV2000	Verrucomicrobia	Verrucomicrobiae	Pedosphaerales	Pedosphaeraceae	ADurb.Bin063-1	cast
ASV5705	Verrucomicrobia	Verrucomicrobiae	Pedosphaerales	Pedosphaeraceae	unclassified	cast
ASV1954	Verrucomicrobia	Verrucomicrobiae	Pedosphaerales	Pedosphaeraceae	ADurb.Bin063-1	cast
ASV5023	Verrucomicrobia	Verrucomicrobiae	Pedosphaerales	Pedosphaeraceae	unclassified	cast
ASV5080	Verrucomicrobia	Verrucomicrobiae	unclassified	unclassified	unclassified	cast
ASV2143	Verrucomicrobia	Verrucomicrobiae	Pedosphaerales	Pedosphaeraceae	unclassified	cast
ASV1144	Verrucomicrobia	Verrucomicrobiae	Pedosphaerales	Pedosphaeraceae	unclassified	cast
ASV3806	Verrucomicrobia	Verrucomicrobiae	Methylacidiphilales	Methylacidiphilaceae	unclassified	cast
ASV3942	Verrucomicrobia	Verrucomicrobiae	Methylacidiphilales	Methylacidiphilaceae	unclassified	cast
ASV6094	Verrucomicrobia	Verrucomicrobiae	Methylacidiphilales	Methylacidiphilaceae	unclassified	cast
ASV3638	Verrucomicrobia	Verrucomicrobiae	Methylacidiphilales	Methylacidiphilaceae	unclassified	cast
ASV2212	Verrucomicrobia	Verrucomicrobiae	Methylacidiphilales	Methylacidiphilaceae	unclassified	cast
ASV3495	Verrucomicrobia	Verrucomicrobiae	Methylacidiphilales	Methylacidiphilaceae	unclassified	cast
ASV6144	Verrucomicrobia	Verrucomicrobiae	Methylacidiphilales	Methylacidiphilaceae	unclassified	cast
ASV1490	Verrucomicrobia	Verrucomicrobiae	Methylacidiphilales	Methylacidiphilaceae	unclassified	cast
ASV5706	Verrucomicrobia	Verrucomicrobiae	Pedosphaerales	Pedosphaeraceae	unclassified	cast
ASV859	Verrucomicrobia	Verrucomicrobiae	Pedosphaerales	Pedosphaeraceae	unclassified	cast
ASV566	Verrucomicrobia	Verrucomicrobiae	Pedosphaerales	Pedosphaeraceae	unclassified	cast
ASV678	Verrucomicrobia	Verrucomicrobiae	Pedosphaerales	Pedosphaeraceae	unclassified	cast
ASV971	Verrucomicrobia	Verrucomicrobiae	Pedosphaerales	Pedosphaeraceae	unclassified	cast
ASV3099	Verrucomicrobia	Verrucomicrobiae	Pedosphaerales	Pedosphaeraceae	unclassified	cast
ASV700	Verrucomicrobia	Verrucomicrobiae	Pedosphaerales	Pedosphaeraceae	unclassified	cast
ASV727	Verrucomicrobia	Verrucomicrobiae	Pedosphaerales	Pedosphaeraceae	unclassified	cast
ASV5743	Verrucomicrobia	Verrucomicrobiae	Pedosphaerales	Pedosphaeraceae	unclassified	cast
ASV4800	Verrucomicrobia	Verrucomicrobiae	Verrucomicrobiales	Verrucomicrobiaceae	unclassified	cast
ASV5507	Verrucomicrobia	Verrucomicrobiae	Verrucomicrobiales	Verrucomicrobiaceae	Roseimicrobium	cast
ASV4292	Verrucomicrobia	Verrucomicrobiae	Verrucomicrobiales	Verrucomicrobiaceae	Roseimicrobium	cast
ASV5412	Verrucomicrobia	Verrucomicrobiae	unclassified	unclassified	unclassified	cast
ASV1041	Verrucomicrobia	Verrucomicrobiae	Verrucomicrobiales	Verrucomicrobiaceae	Verrucomicrobium	cast
ASV1283	Verrucomicrobia	Verrucomicrobiae	Verrucomicrobiales	Verrucomicrobiaceae	Verrucomicrobium	cast
ASV3378	Verrucomicrobia	Verrucomicrobiae	Verrucomicrobiales	Verrucomicrobiaceae	Verrucomicrobium	cast
ASV3797	Verrucomicrobia	Verrucomicrobiae	Verrucomicrobiales	unclassified	unclassified	cast
ASV610	Verrucomicrobia	Verrucomicrobiae	Verrucomicrobiales	Rubritaleaceae	Luteolibacter	cast
ASV4799	Verrucomicrobia	Verrucomicrobiae	Verrucomicrobiales	Rubritaleaceae	Luteolibacter	cast
ASV514	Verrucomicrobia	Verrucomicrobiae	Verrucomicrobiales	Rubritaleaceae	Luteolibacter	cast
ASV503	Verrucomicrobia	Verrucomicrobiae	Verrucomicrobiales	Rubritaleaceae	Luteolibacter	cast
ASV4368	Verrucomicrobia	Verrucomicrobiae	Verrucomicrobiales	Rubritaleaceae	Luteolibacter	cast
ASV318	Verrucomicrobia	Verrucomicrobiae	Verrucomicrobiales	Rubritaleaceae	Luteolibacter	cast
ASV349	Verrucomicrobia	Verrucomicrobiae	Verrucomicrobiales	Rubritaleaceae	Luteolibacter	cast
ASV4721	Verrucomicrobia	Verrucomicrobiae	unclassified	unclassified	unclassified	cast
ASV3437	Verrucomicrobia	Verrucomicrobiae	Chthoniobacterales	Chthoniobacteraceae	Chthoniobacter	cast
ASV1787	Verrucomicrobia	Verrucomicrobiae	Chthoniobacterales	Chthoniobacteraceae	Chthoniobacter	cast
ASV1788	Verrucomicrobia	Verrucomicrobiae	Chthoniobacterales	Chthoniobacteraceae	Chthoniobacter	cast
ASV2884	Verrucomicrobia	Verrucomicrobiae	Chthoniobacterales	Chthoniobacteraceae	Chthoniobacter	cast
ASV3507	Verrucomicrobia	Verrucomicrobiae	Chthoniobacterales	Chthoniobacteraceae	Chthoniobacter	cast
ASV1189	Verrucomicrobia	Verrucomicrobiae	Chthoniobacterales	Chthoniobacteraceae	Chthoniobacter	cast
ASV2433	Verrucomicrobia	Verrucomicrobiae	Chthoniobacterales	Chthoniobacteraceae	Chthoniobacter	cast
ASV1643	Verrucomicrobia	Verrucomicrobiae	Chthoniobacterales	Chthoniobacteraceae	Chthoniobacter	cast
ASV467	Verrucomicrobia	Verrucomicrobiae	Chthoniobacterales	Chthoniobacteraceae	Chthoniobacter	cast
ASV1429	Verrucomicrobia	Verrucomicrobiae	Chthoniobacterales	Chthoniobacteraceae	Chthoniobacter	cast
ASV737	Verrucomicrobia	Verrucomicrobiae	Chthoniobacterales	Chthoniobacteraceae	Chthoniobacter	cast
ASV4308	Verrucomicrobia	Verrucomicrobiae	Chthoniobacterales	Chthoniobacteraceae	Chthoniobacter	cast
ASV3024	Verrucomicrobia	Verrucomicrobiae	Chthoniobacterales	Chthoniobacteraceae	Chthoniobacter	cast
ASV4532	Verrucomicrobia	Verrucomicrobiae	Chthoniobacterales	Chthoniobacteraceae	Chthoniobacter	cast
ASV3025	Verrucomicrobia	Verrucomicrobiae	Chthoniobacterales	Chthoniobacteraceae	Chthoniobacter	cast
ASV1107	Verrucomicrobia	Verrucomicrobiae	Chthoniobacterales	Chthoniobacteraceae	Chthoniobacter	cast
ASV5424	Verrucomicrobia	Verrucomicrobiae	Chthoniobacterales	Chthoniobacteraceae	Chthoniobacter	cast
ASV2182	Verrucomicrobia	Verrucomicrobiae	unclassified	unclassified	unclassified	cast
ASV3011	Verrucomicrobia	Verrucomicrobiae	Chthoniobacterales	Chthoniobacteraceae	Chthoniobacter	cast
ASV1624	Verrucomicrobia	Verrucomicrobiae	Chthoniobacterales	Chthoniobacteraceae	Chthoniobacter	cast
ASV1062	Verrucomicrobia	Verrucomicrobiae	Chthoniobacterales	Chthoniobacteraceae	Chthoniobacter	cast
ASV3460	Verrucomicrobia	Verrucomicrobiae	unclassified	unclassified	unclassified	cast
ASV3640	Verrucomicrobia	Verrucomicrobiae	unclassified	unclassified	unclassified	cast
ASV1525	Verrucomicrobia	Verrucomicrobiae	Chthoniobacterales	Chthoniobacteraceae	Candidatus_Udaeobacter	cast
ASV5965	Verrucomicrobia	Verrucomicrobiae	Chthoniobacterales	Chthoniobacteraceae	Candidatus_Udaeobacter	cast
ASV1044	Verrucomicrobia	Verrucomicrobiae	Chthoniobacterales	Chthoniobacteraceae	Candidatus_Udaeobacter	cast
ASV5454	Verrucomicrobia	Verrucomicrobiae	Chthoniobacterales	Chthoniobacteraceae	Candidatus_Udaeobacter	cast
ASV1720	Verrucomicrobia	Verrucomicrobiae	Chthoniobacterales	Chthoniobacteraceae	Candidatus_Udaeobacter	cast
ASV380	Verrucomicrobia	Verrucomicrobiae	Chthoniobacterales	Chthoniobacteraceae	Candidatus_Udaeobacter	cast
ASV374	Verrucomicrobia	Verrucomicrobiae	Chthoniobacterales	Chthoniobacteraceae	Candidatus_Udaeobacter	cast
ASV1674	Verrucomicrobia	Verrucomicrobiae	Chthoniobacterales	Chthoniobacteraceae	Candidatus_Udaeobacter	cast
ASV2414	Verrucomicrobia	Verrucomicrobiae	Chthoniobacterales	Chthoniobacteraceae	Candidatus_Udaeobacter	cast
ASV888	Verrucomicrobia	Verrucomicrobiae	Chthoniobacterales	Chthoniobacteraceae	Candidatus_Udaeobacter	cast
ASV940	Verrucomicrobia	Verrucomicrobiae	Chthoniobacterales	Chthoniobacteraceae	Candidatus_Udaeobacter	cast
ASV6446	Verrucomicrobia	Verrucomicrobiae	Chthoniobacterales	Chthoniobacteraceae	Candidatus_Udaeobacter	cast
ASV2315	Verrucomicrobia	Verrucomicrobiae	Chthoniobacterales	Chthoniobacteraceae	Candidatus_Udaeobacter	cast
ASV953	Verrucomicrobia	Verrucomicrobiae	Chthoniobacterales	Chthoniobacteraceae	Candidatus_Udaeobacter	cast
ASV5647	Verrucomicrobia	Verrucomicrobiae	Chthoniobacterales	unclassified	unclassified	cast
ASV2547	Verrucomicrobia	Verrucomicrobiae	Chthoniobacterales	Chthoniobacteraceae	unclassified	cast
ASV2483	Verrucomicrobia	Verrucomicrobiae	UA11	unclassified	unclassified	cast
ASV2727	Verrucomicrobia	Verrucomicrobiae	UA11	unclassified	unclassified	cast
ASV695	Verrucomicrobia	Verrucomicrobiae	Chthoniobacterales	Terrimicrobiaceae	Terrimicrobium	cast
ASV3072	Verrucomicrobia	Verrucomicrobiae	Chthoniobacterales	Terrimicrobiaceae	Terrimicrobium	cast
ASV908	Verrucomicrobia	Verrucomicrobiae	Chthoniobacterales	Xiphinematobacteraceae	Candidatus_Xiphinematobacter	cast
ASV5292	Verrucomicrobia	Verrucomicrobiae	Chthoniobacterales	Xiphinematobacteraceae	Candidatus_Xiphinematobacter	cast
ASV1319	Verrucomicrobia	Verrucomicrobiae	Chthoniobacterales	Xiphinematobacteraceae	Candidatus_Xiphinematobacter	cast
ASV551	Verrucomicrobia	Verrucomicrobiae	Chthoniobacterales	Xiphinematobacteraceae	Candidatus_Xiphinematobacter	cast
ASV1874	Verrucomicrobia	Verrucomicrobiae	Chthoniobacterales	Terrimicrobiaceae	Terrimicrobium	cast
ASV5864	Proteobacteria	Gammaproteobacteria	unclassified	unclassified	unclassified	cast
ASV992	Proteobacteria	Gammaproteobacteria	unclassified	unclassified	unclassified	cast
ASV6139	Proteobacteria	Gammaproteobacteria	unclassified	unclassified	unclassified	cast
ASV4004	Proteobacteria	Gammaproteobacteria	Legionellales	Legionellaceae	Legionella	cast
ASV4725	Proteobacteria	Gammaproteobacteria	Legionellales	Legionellaceae	Legionella	cast
ASV4653	Proteobacteria	Gammaproteobacteria	Legionellales	Legionellaceae	Legionella	cast
ASV4939	Proteobacteria	Gammaproteobacteria	Legionellales	Legionellaceae	Legionella	cast
ASV5421	Proteobacteria	Gammaproteobacteria	Diplorickettsiales	Diplorickettsiaceae	Rickettsiella	cast
ASV6294	Proteobacteria	Gammaproteobacteria	unclassified	unclassified	unclassified	cast
ASV4991	Proteobacteria	Gammaproteobacteria	Diplorickettsiales	Diplorickettsiaceae	Aquicella	cast
ASV5420	Proteobacteria	Gammaproteobacteria	Diplorickettsiales	Diplorickettsiaceae	Aquicella	cast
ASV2009	Proteobacteria	Gammaproteobacteria	Diplorickettsiales	Diplorickettsiaceae	Aquicella	cast
ASV5921	Proteobacteria	Gammaproteobacteria	Diplorickettsiales	Diplorickettsiaceae	Aquicella	cast
ASV4944	Proteobacteria	Gammaproteobacteria	Diplorickettsiales	Diplorickettsiaceae	Aquicella	cast
ASV3799	Proteobacteria	Gammaproteobacteria	JG36-TzT-191	unclassified	unclassified	cast
ASV3022	Proteobacteria	Gammaproteobacteria	JG36-TzT-191	unclassified	unclassified	cast
ASV774	Proteobacteria	Gammaproteobacteria	Gammaproteobacteria_Incertae_Sedis	Unknown_Family	Acidibacter	cast
ASV1526	Proteobacteria	Gammaproteobacteria	Gammaproteobacteria_Incertae_Sedis	Unknown_Family	Acidibacter	cast
ASV1891	Proteobacteria	Gammaproteobacteria	Gammaproteobacteria_Incertae_Sedis	Unknown_Family	Acidibacter	cast
ASV4197	Proteobacteria	Gammaproteobacteria	Gammaproteobacteria_Incertae_Sedis	Unknown_Family	Acidibacter	cast
ASV6072	Proteobacteria	Deltaproteobacteria	Bdellovibrionales	Bdellovibrionaceae	OM27_clade	cast
ASV1491	Proteobacteria	Deltaproteobacteria	Bdellovibrionales	Bacteriovoracaceae	Bacteriovorax	cast
ASV5204	Proteobacteria	Deltaproteobacteria	Bdellovibrionales	Bacteriovoracaceae	Peredibacter	cast
ASV3933	Proteobacteria	Deltaproteobacteria	Bdellovibrionales	Bacteriovoracaceae	Peredibacter	cast
ASV614	Proteobacteria	Deltaproteobacteria	Bdellovibrionales	Bacteriovoracaceae	Peredibacter	cast
ASV915	Proteobacteria	Deltaproteobacteria	Bdellovibrionales	Bacteriovoracaceae	Peredibacter	cast
ASV5222	Proteobacteria	Deltaproteobacteria	Bdellovibrionales	Bacteriovoracaceae	Peredibacter	cast
ASV2917	Proteobacteria	Deltaproteobacteria	Bdellovibrionales	Bacteriovoracaceae	Peredibacter	cast
ASV6284	Proteobacteria	Deltaproteobacteria	Oligoflexales	Oligoflexaceae	Candidatus_Turbabacter	cast
ASV6253	Proteobacteria	Deltaproteobacteria	Oligoflexales	Oligoflexaceae	Silvanigrella	cast
ASV786	Proteobacteria	Deltaproteobacteria	Oligoflexales	Oligoflexaceae	Oligoflexus	cast
ASV6067	Proteobacteria	Deltaproteobacteria	Oligoflexales	Oligoflexaceae	unclassified	cast
ASV5913	Proteobacteria	Deltaproteobacteria	Oligoflexales	Oligoflexaceae	unclassified	cast
ASV6366	Proteobacteria	Deltaproteobacteria	Oligoflexales	Oligoflexaceae	unclassified	cast
ASV6114	Planctomycetes	unclassified	unclassified	unclassified	unclassified	cast
ASV4023	Planctomycetes	Planctomycetacia	unclassified	unclassified	unclassified	cast
ASV5849	Planctomycetes	Planctomycetacia	unclassified	unclassified	unclassified	cast
ASV1925	Planctomycetes	Planctomycetacia	Gemmatales	Gemmataceae	unclassified	cast
ASV2084	Planctomycetes	Planctomycetacia	Gemmatales	Gemmataceae	unclassified	cast
ASV5175	Planctomycetes	Planctomycetacia	Gemmatales	Gemmataceae	unclassified	cast
ASV3930	Planctomycetes	Planctomycetacia	Gemmatales	Gemmataceae	unclassified	cast
ASV4518	Planctomycetes	Planctomycetacia	Gemmatales	Gemmataceae	unclassified	cast
ASV5538	Planctomycetes	Planctomycetacia	Gemmatales	Gemmataceae	unclassified	cast
ASV5860	Planctomycetes	Planctomycetacia	Gemmatales	Gemmataceae	unclassified	cast
ASV5646	Planctomycetes	Planctomycetacia	Gemmatales	Gemmataceae	unclassified	cast
ASV5297	Planctomycetes	Planctomycetacia	Gemmatales	Gemmataceae	unclassified	cast
ASV3252	Planctomycetes	Planctomycetacia	Gemmatales	Gemmataceae	unclassified	cast
ASV4709	Planctomycetes	Planctomycetacia	Gemmatales	Gemmataceae	unclassified	cast
ASV5964	Planctomycetes	Planctomycetacia	Gemmatales	Gemmataceae	unclassified	cast
ASV4717	Planctomycetes	Planctomycetacia	Gemmatales	Gemmataceae	unclassified	cast
ASV4529	Planctomycetes	Planctomycetacia	Gemmatales	Gemmataceae	unclassified	cast
ASV5658	Planctomycetes	Planctomycetacia	Gemmatales	Gemmataceae	unclassified	cast
ASV6070	Planctomycetes	Planctomycetacia	Gemmatales	Gemmataceae	unclassified	cast
ASV3031	Planctomycetes	Planctomycetacia	Gemmatales	Gemmataceae	unclassified	cast
ASV5962	Planctomycetes	Planctomycetacia	Gemmatales	Gemmataceae	unclassified	cast
ASV4315	Planctomycetes	Planctomycetacia	Gemmatales	Gemmataceae	unclassified	cast
ASV6357	Planctomycetes	Planctomycetacia	Gemmatales	Gemmataceae	Fimbriiglobus	cast
ASV5720	Planctomycetes	Planctomycetacia	Gemmatales	Gemmataceae	Gemmata	cast
ASV3936	Planctomycetes	Planctomycetacia	Gemmatales	Gemmataceae	Gemmata	cast
ASV2487	Planctomycetes	Planctomycetacia	Gemmatales	Gemmataceae	Gemmata	cast
ASV6136	Planctomycetes	Planctomycetacia	Gemmatales	Gemmataceae	Gemmata	cast
ASV6140	Planctomycetes	Planctomycetacia	Gemmatales	Gemmataceae	Gemmata	cast
ASV6268	Planctomycetes	Planctomycetacia	Gemmatales	Gemmataceae	Gemmata	cast
ASV6278	Planctomycetes	Planctomycetacia	Gemmatales	Gemmataceae	Gemmata	cast
ASV5177	Planctomycetes	Planctomycetacia	Gemmatales	Gemmataceae	Gemmata	cast
ASV5261	Planctomycetes	Planctomycetacia	Gemmatales	Gemmataceae	Gemmata	cast
ASV3985	Planctomycetes	Planctomycetacia	Gemmatales	Gemmataceae	Gemmata	cast
ASV5650	Planctomycetes	Planctomycetacia	Gemmatales	Gemmataceae	unclassified	cast
ASV6113	Planctomycetes	Planctomycetacia	Gemmatales	Gemmataceae	Gemmata	cast
ASV4318	Planctomycetes	Planctomycetacia	Gemmatales	Gemmataceae	unclassified	cast
ASV1920	Planctomycetes	Planctomycetacia	Gemmatales	Gemmataceae	unclassified	cast
ASV5539	Planctomycetes	Planctomycetacia	Gemmatales	Gemmataceae	unclassified	cast
ASV2918	Planctomycetes	Planctomycetacia	Gemmatales	Gemmataceae	unclassified	cast
ASV941	Planctomycetes	Planctomycetacia	Gemmatales	Gemmataceae	unclassified	cast
ASV5888	Planctomycetes	Planctomycetacia	Gemmatales	Gemmataceae	unclassified	cast
ASV3122	Planctomycetes	Planctomycetacia	Isosphaerales	Isosphaeraceae	unclassified	cast
ASV2210	Planctomycetes	Planctomycetacia	Isosphaerales	Isosphaeraceae	unclassified	cast
ASV5078	Planctomycetes	Planctomycetacia	Isosphaerales	Isosphaeraceae	unclassified	cast
ASV1670	Planctomycetes	Planctomycetacia	Isosphaerales	Isosphaeraceae	unclassified	cast
ASV2645	Planctomycetes	Planctomycetacia	Isosphaerales	Isosphaeraceae	unclassified	cast
ASV4316	Planctomycetes	Planctomycetacia	Isosphaerales	Isosphaeraceae	unclassified	cast
ASV3078	Planctomycetes	Planctomycetacia	Isosphaerales	Isosphaeraceae	unclassified	cast
ASV5243	Planctomycetes	Planctomycetacia	Isosphaerales	Isosphaeraceae	Singulisphaera	cast
ASV917	Planctomycetes	Planctomycetacia	Isosphaerales	Isosphaeraceae	Singulisphaera	cast
ASV3635	Planctomycetes	Planctomycetacia	Isosphaerales	Isosphaeraceae	Singulisphaera	cast
ASV957	Planctomycetes	Planctomycetacia	Isosphaerales	Isosphaeraceae	Singulisphaera	cast
ASV1077	Planctomycetes	Planctomycetacia	Isosphaerales	Isosphaeraceae	unclassified	cast
ASV6371	Planctomycetes	Planctomycetacia	Isosphaerales	Isosphaeraceae	Singulisphaera	cast
ASV3747	Planctomycetes	Planctomycetacia	Isosphaerales	Isosphaeraceae	Singulisphaera	cast
ASV4794	Planctomycetes	Planctomycetacia	Isosphaerales	Isosphaeraceae	Singulisphaera	cast
ASV2550	Planctomycetes	Planctomycetacia	Isosphaerales	Isosphaeraceae	Singulisphaera	cast
ASV2145	Planctomycetes	Planctomycetacia	Isosphaerales	Isosphaeraceae	Aquisphaera	cast
ASV4527	Planctomycetes	Planctomycetacia	Isosphaerales	Isosphaeraceae	unclassified	cast
ASV3503	Planctomycetes	Planctomycetacia	Isosphaerales	Isosphaeraceae	Singulisphaera	cast
ASV3462	Planctomycetes	Planctomycetacia	Isosphaerales	Isosphaeraceae	Singulisphaera	cast
ASV3009	Planctomycetes	Planctomycetacia	Isosphaerales	Isosphaeraceae	Singulisphaera	cast
ASV2634	Planctomycetes	Planctomycetacia	Isosphaerales	Isosphaeraceae	unclassified	cast
ASV6244	Planctomycetes	Planctomycetacia	Gemmatales	Gemmataceae	unclassified	cast
ASV4310	Planctomycetes	Planctomycetacia	Gemmatales	Gemmataceae	unclassified	cast
ASV3337	Planctomycetes	Planctomycetacia	Gemmatales	Gemmataceae	unclassified	cast
ASV5176	Planctomycetes	Planctomycetacia	Gemmatales	Gemmataceae	unclassified	cast
ASV5434	Planctomycetes	Planctomycetacia	Gemmatales	Gemmataceae	unclassified	cast
ASV5543	Planctomycetes	Planctomycetacia	Gemmatales	Gemmataceae	unclassified	cast
ASV5402	Planctomycetes	Planctomycetacia	Gemmatales	Gemmataceae	unclassified	cast
ASV5220	Planctomycetes	Planctomycetacia	Gemmatales	Gemmataceae	unclassified	cast
ASV275	Planctomycetes	Planctomycetacia	Planctomycetales	unclassified	unclassified	cast
ASV2307	Planctomycetes	Planctomycetacia	Planctomycetales	unclassified	unclassified	cast
ASV1493	Planctomycetes	Planctomycetacia	Planctomycetales	unclassified	unclassified	cast
ASV6270	Planctomycetes	Planctomycetacia	Planctomycetales	Rubinisphaeraceae	SH-PL14	cast
ASV6250	Planctomycetes	Planctomycetacia	Pirellulales	Pirellulaceae	Blastopirellula	cast
ASV5851	Planctomycetes	Planctomycetacia	Pirellulales	Pirellulaceae	unclassified	cast
ASV4772	Planctomycetes	Planctomycetacia	Pirellulales	Pirellulaceae	unclassified	cast
ASV6363	Planctomycetes	Planctomycetacia	Pirellulales	Pirellulaceae	unclassified	cast
ASV1635	Planctomycetes	Planctomycetacia	Pirellulales	Pirellulaceae	unclassified	cast
ASV1861	Planctomycetes	Planctomycetacia	Pirellulales	Pirellulaceae	unclassified	cast
ASV5854	Planctomycetes	Planctomycetacia	Pirellulales	Pirellulaceae	Pirellula	cast
ASV6257	Planctomycetes	Planctomycetacia	Pirellulales	Pirellulaceae	Pirellula	cast
ASV1300	Planctomycetes	Planctomycetacia	Pirellulales	Pirellulaceae	Pirellula	cast
ASV1140	Planctomycetes	Planctomycetacia	Pirellulales	Pirellulaceae	Pirellula	cast
ASV4729	Planctomycetes	Planctomycetacia	Pirellulales	Pirellulaceae	Pirellula	cast
ASV4122	Planctomycetes	Planctomycetacia	Pirellulales	Pirellulaceae	Pirellula	cast
ASV4524	Planctomycetes	Planctomycetacia	Pirellulales	Pirellulaceae	Pirellula	cast
ASV1345	Planctomycetes	Planctomycetacia	Pirellulales	Pirellulaceae	Pirellula	cast
ASV3076	Planctomycetes	Planctomycetacia	Pirellulales	Pirellulaceae	Pirellula	cast
ASV685	Planctomycetes	Planctomycetacia	Pirellulales	Pirellulaceae	Pir4_lineage	cast
ASV1892	Planctomycetes	Planctomycetacia	Pirellulales	Pirellulaceae	Pir4_lineage	cast
ASV5690	Planctomycetes	Planctomycetacia	Pirellulales	Pirellulaceae	Pir4_lineage	cast
ASV6065	Planctomycetes	Planctomycetacia	Pirellulales	Pirellulaceae	Pir4_lineage	cast
ASV5079	Planctomycetes	Pla4_lineage	unclassified	unclassified	unclassified	cast
ASV6364	Planctomycetes	Phycisphaerae	Tepidisphaerales	CPla-3_termite_group	unclassified	cast
ASV1042	Planctomycetes	Phycisphaerae	Tepidisphaerales	CPla-3_termite_group	unclassified	cast
ASV5259	Planctomycetes	Phycisphaerae	Tepidisphaerales	CPla-3_termite_group	unclassified	cast
ASV6059	Planctomycetes	Phycisphaerae	Tepidisphaerales	CPla-3_termite_group	unclassified	cast
ASV535	Planctomycetes	Phycisphaerae	Phycisphaerales	Phycisphaeraceae	Phycisphaera	cast
ASV5408	Planctomycetes	Phycisphaerae	Phycisphaerales	Phycisphaeraceae	SM1A02	cast
ASV5456	Planctomycetes	Phycisphaerae	Phycisphaerales	Phycisphaeraceae	SM1A02	cast
ASV4306	Planctomycetes	Phycisphaerae	Tepidisphaerales	WD2101_soil_group	unclassified	cast
ASV1427	Planctomycetes	Phycisphaerae	Tepidisphaerales	WD2101_soil_group	unclassified	cast
ASV4123	Planctomycetes	Phycisphaerae	Tepidisphaerales	WD2101_soil_group	unclassified	cast
ASV4576	Planctomycetes	Phycisphaerae	Tepidisphaerales	WD2101_soil_group	unclassified	cast
ASV749	Planctomycetes	Phycisphaerae	Tepidisphaerales	WD2101_soil_group	unclassified	cast
ASV3247	Planctomycetes	Phycisphaerae	Tepidisphaerales	WD2101_soil_group	unclassified	cast
ASV5182	Planctomycetes	Phycisphaerae	Tepidisphaerales	WD2101_soil_group	unclassified	cast
ASV5076	Planctomycetes	Phycisphaerae	Tepidisphaerales	WD2101_soil_group	unclassified	cast
ASV1351	Planctomycetes	Phycisphaerae	Tepidisphaerales	WD2101_soil_group	unclassified	cast
ASV2211	Planctomycetes	Phycisphaerae	Tepidisphaerales	WD2101_soil_group	unclassified	cast
ASV3423	Planctomycetes	Phycisphaerae	Tepidisphaerales	WD2101_soil_group	unclassified	cast
ASV1432	Planctomycetes	Phycisphaerae	Tepidisphaerales	WD2101_soil_group	unclassified	cast
ASV1786	Planctomycetes	Phycisphaerae	Tepidisphaerales	WD2101_soil_group	unclassified	cast
ASV5934	Planctomycetes	Phycisphaerae	Tepidisphaerales	WD2101_soil_group	unclassified	cast
ASV613	Planctomycetes	Phycisphaerae	Tepidisphaerales	WD2101_soil_group	unclassified	cast
ASV1462	Planctomycetes	Phycisphaerae	Tepidisphaerales	WD2101_soil_group	unclassified	cast
ASV4522	Planctomycetes	Phycisphaerae	Tepidisphaerales	WD2101_soil_group	unclassified	cast
ASV3793	Planctomycetes	Phycisphaerae	Tepidisphaerales	WD2101_soil_group	unclassified	cast
ASV2944	Planctomycetes	Phycisphaerae	Tepidisphaerales	WD2101_soil_group	unclassified	cast
ASV4718	Planctomycetes	Phycisphaerae	Tepidisphaerales	WD2101_soil_group	unclassified	cast
ASV4817	Planctomycetes	Phycisphaerae	Tepidisphaerales	WD2101_soil_group	unclassified	cast
ASV4519	Planctomycetes	Phycisphaerae	Tepidisphaerales	WD2101_soil_group	unclassified	cast
ASV5194	Planctomycetes	Phycisphaerae	Tepidisphaerales	unclassified	unclassified	cast
ASV6066	Planctomycetes	Phycisphaerae	Tepidisphaerales	unclassified	unclassified	cast
ASV804	Planctomycetes	Phycisphaerae	Tepidisphaerales	unclassified	unclassified	cast
ASV6360	Planctomycetes	Phycisphaerae	Pla1_lineage	unclassified	unclassified	cast
ASV6076	Armatimonadetes	Chthonomonadetes	Chthonomonadales	Chthonomonadaceae	Chthonomonas	cast
ASV4111	Chloroflexi	Chloroflexia	Thermomicrobiales	JG30-KF-CM45	unclassified	cast
ASV6271	Chloroflexi	Chloroflexia	Thermomicrobiales	JG30-KF-CM45	unclassified	cast
ASV2208	Chloroflexi	Anaerolineae	RBG-13-54-9	unclassified	unclassified	cast
ASV6095	Chloroflexi	Anaerolineae	RBG-13-54-9	unclassified	unclassified	cast
ASV5844	Chloroflexi	Ktedonobacteria	Ktedonobacterales	JG30-KF-AS9	unclassified	cast
ASV5482	Chloroflexi	Ktedonobacteria	Ktedonobacterales	JG30-KF-AS9	unclassified	cast
ASV1745	Chloroflexi	Ktedonobacteria	Ktedonobacterales	unclassified	unclassified	cast
ASV6060	Chloroflexi	Ktedonobacteria	Ktedonobacterales	Ktedonobacteraceae	unclassified	cast
ASV6370	Chloroflexi	Ktedonobacteria	Ktedonobacterales	Ktedonobacteraceae	FCPS473	cast
ASV1106	Chloroflexi	Ktedonobacteria	Ktedonobacterales	Ktedonobacteraceae	1959-1	cast
ASV5744	Chloroflexi	Ktedonobacteria	Ktedonobacterales	Ktedonobacteraceae	unclassified	cast
ASV3794	Chloroflexi	Ktedonobacteria	Ktedonobacterales	Ktedonobacteraceae	unclassified	cast
ASV5406	Chloroflexi	Ktedonobacteria	Ktedonobacterales	Ktedonobacteraceae	unclassified	cast
ASV6367	Chloroflexi	Ktedonobacteria	Ktedonobacterales	Ktedonobacteraceae	unclassified	cast
ASV4616	Chloroflexi	Ktedonobacteria	Ktedonobacterales	Ktedonobacteraceae	HSB_OF53-F07	cast
ASV5544	Chloroflexi	Ktedonobacteria	Ktedonobacterales	Ktedonobacteraceae	HSB_OF53-F07	cast
ASV5641	Chloroflexi	Ktedonobacteria	Ktedonobacterales	Ktedonobacteraceae	unclassified	cast
ASV6249	Chloroflexi	Ktedonobacteria	Ktedonobacterales	Ktedonobacteraceae	unclassified	cast
ASV5702	Chloroflexi	Anaerolineae	SBR1031	unclassified	unclassified	cast
ASV2486	Chloroflexi	Ktedonobacteria	C0119	unclassified	unclassified	cast
ASV5401	Chloroflexi	Ktedonobacteria	C0119	unclassified	unclassified	cast
ASV6143	Chloroflexi	TK10	unclassified	unclassified	unclassified	cast
ASV1520	Chloroflexi	TK10	unclassified	unclassified	unclassified	cast
ASV865	Chloroflexi	TK10	unclassified	unclassified	unclassified	cast
ASV2419	Chloroflexi	TK10	unclassified	unclassified	unclassified	cast
ASV4198	Chloroflexi	TK10	unclassified	unclassified	unclassified	cast
ASV2579	Chloroflexi	TK10	unclassified	unclassified	unclassified	cast
ASV1832	Chloroflexi	TK10	unclassified	unclassified	unclassified	cast
ASV6080	Chloroflexi	TK10	unclassified	unclassified	unclassified	cast
ASV3642	Chloroflexi	TK10	unclassified	unclassified	unclassified	cast
ASV5845	Chloroflexi	Anaerolineae	Caldilineales	Caldilineaceae	unclassified	cast
ASV6255	Chloroflexi	Anaerolineae	Caldilineales	Caldilineaceae	unclassified	cast
ASV6258	Chloroflexi	Anaerolineae	Caldilineales	Caldilineaceae	unclassified	cast
ASV5296	Firmicutes	Bacilli	Bacillales	Paenibacillaceae	Paenibacillus	cast
ASV2548	Firmicutes	Bacilli	Bacillales	Paenibacillaceae	Cohnella	cast
ASV1446	Firmicutes	Bacilli	Bacillales	Paenibacillaceae	Cohnella	cast
ASV2490	Firmicutes	Bacilli	Bacillales	Paenibacillaceae	Paenibacillus	cast
ASV5184	Firmicutes	Bacilli	Bacillales	Paenibacillaceae	unclassified	cast
ASV1230	Firmicutes	Bacilli	Bacillales	Paenibacillaceae	Paenibacillus	cast
ASV5221	Firmicutes	Bacilli	Bacillales	Paenibacillaceae	Paenibacillus	cast
ASV2914	Firmicutes	Bacilli	Bacillales	Paenibacillaceae	unclassified	cast
ASV708	Firmicutes	Bacilli	Bacillales	Paenibacillaceae	Paenibacillus	cast
ASV907	Firmicutes	Bacilli	Bacillales	Paenibacillaceae	Paenibacillus	cast
ASV123	Firmicutes	Bacilli	Bacillales	Paenibacillaceae	Paenibacillus	cast
ASV6283	Firmicutes	Bacilli	Bacillales	Paenibacillaceae	Paenibacillus	cast
ASV1171	Firmicutes	Bacilli	Bacillales	Paenibacillaceae	Paenibacillus	cast
ASV936	Firmicutes	Bacilli	Bacillales	Paenibacillaceae	Paenibacillus	cast
ASV1353	Firmicutes	Bacilli	Bacillales	Paenibacillaceae	Paenibacillus	cast
ASV3949	Firmicutes	Bacilli	Bacillales	Paenibacillaceae	Paenibacillus	cast
ASV3560	Firmicutes	Bacilli	Bacillales	Paenibacillaceae	Paenibacillus	cast
ASV4196	Firmicutes	Bacilli	Bacillales	Paenibacillaceae	Paenibacillus	cast
ASV6145	Firmicutes	Bacilli	Bacillales	Paenibacillaceae	Brevibacillus	cast
ASV3284	Firmicutes	Bacilli	Bacillales	Paenibacillaceae	Brevibacillus	cast
ASV671	Firmicutes	Bacilli	Bacillales	Planococcaceae	unclassified	cast
ASV1672	Firmicutes	Bacilli	Bacillales	unclassified	unclassified	cast
[truncated: 3,508 more rows]

## Sheet: ST2
Supplementary Table S2. Differential abundance in bacterial amplicon sequence variants (ASVs) of soil and earthworm samples (gut and cast together) from earthworm species Aporrectodea caliginosa analyzed using negative binomial models as implemented in the package DESeq2
Positive and negative logFC indicate increases and decreases in earthworm samples over soil samples
baseMean	log2FoldChange	lfcSE	stat	pvalue	padj	Phylum	Class	Order	Family	Genus	ASV
5.93762	5.58506	2.17978	2.56222	0.0104007	0.0480843	Acidobacteria	Acidobacteriia	Solibacterales	Solibacteraceae_(Subgroup_3)	Candidatus Solibacter	ASV316
3.42678	4.7908	1.71179	2.79872	0.00513063	0.0282185	Acidobacteria	Blastocatellia_(Subgroup_4)	Blastocatellales	Blastocatellaceae	JGI 0001001-H03	ASV537
3.27763	4.72684	1.8026	2.62223	0.00873565	0.0419048	Acidobacteria	Subgroup_6	unclassified	unclassified	unclassified	ASV527
26.4277	-2.75873	1.05521	-2.61438	0.0089389	0.0425598	Acidobacteria	Acidobacteriia	Acidobacteriales	unclassified	unclassified	ASV66
39.1738	-3.1794	1.11502	-2.85142	0.00435247	0.0247936	Acidobacteria	Acidobacteriia	Subgroup_2	unclassified	unclassified	ASV34
10.6264	-3.41374	1.22536	-2.7859	0.00533796	0.0288612	Acidobacteria	Acidobacteriia	Acidobacteriales	unclassified	unclassified	ASV171
13.3876	-3.4767	1.02832	-3.38095	0.00072237	0.00617947	Acidobacteria	Acidobacteriia	Acidobacteriales	unclassified	unclassified	ASV139
7.24258	-3.93731	1.02211	-3.85215	0.000117087	0.00133395	Acidobacteria	Acidobacteriia	Acidobacteriales	unclassified	unclassified	ASV229
20.1273	-4.00268	0.933558	-4.28755	1.80653e-05	0.000261948	Acidobacteria	Acidobacteriia	Solibacterales	Solibacteraceae_(Subgroup_3)	Bryobacter	ASV90
11.5122	-4.08748	1.53982	-2.65453	0.00794194	0.0392787	Acidobacteria	Acidobacteriia	Solibacterales	Solibacteraceae_(Subgroup_3)	Candidatus Solibacter	ASV189
15.6111	-4.10233	0.941053	-4.3593	1.30478e-05	0.000193593	Acidobacteria	Acidobacteriia	Subgroup_2	unclassified	unclassified	ASV102
5.91317	-4.32817	1.61233	-2.68441	0.00726571	0.0367899	Acidobacteria	Acidobacteriia	Acidobacteriales	unclassified	unclassified	ASV330
13.2417	-4.37975	1.00326	-4.36554	1.26807e-05	0.000192626	Acidobacteria	Acidobacteriia	Acidobacteriales	unclassified	unclassified	ASV160
9.76925	-4.40668	1.13484	-3.88308	0.000103141	0.00124158	Acidobacteria	Acidobacteriia	Acidobacteriales	unclassified	unclassified	ASV161
2.95853	-4.40962	1.65101	-2.67086	0.00756576	0.0380075	Acidobacteria	Subgroup_6	unclassified	unclassified	unclassified	ASV627
4.1868	-4.47196	1.48825	-3.00483	0.00265725	0.0167303	Acidobacteria	Acidobacteriia	Solibacterales	Solibacteraceae_(Subgroup_3)	Bryobacter	ASV459
6.69239	-4.89349	1.90519	-2.56851	0.0102137	0.0475645	Acidobacteria	Blastocatellia_(Subgroup_4)	Pyrinomonadales	Pyrinomonadaceae	RB41	ASV299
11.8207	-5.06604	1.30908	-3.86992	0.000108872	0.00128631	Acidobacteria	Acidobacteriia	Acidobacteriales	unclassified	unclassified	ASV175
5.8579	-5.20648	1.48229	-3.51246	0.000443974	0.00416552	Acidobacteria	Holophagae	Subgroup_7	unclassified	unclassified	ASV369
22.4007	-5.25373	1.10864	-4.73889	2.14894e-06	3.9172e-05	Acidobacteria	Holophagae	Subgroup_7	unclassified	unclassified	ASV91
3.01018	-5.45794	1.32306	-4.12523	3.70363e-05	0.000513677	Acidobacteria	Acidobacteriia	Subgroup_2	unclassified	unclassified	ASV648
3.20247	-5.54713	1.62489	-3.41386	0.00064049	0.00559771	Acidobacteria	Acidobacteriia	Acidobacteriales	Acidobacteriaceae_(Subgroup_1)	unclassified	ASV618
3.66391	-5.74159	1.52153	-3.77355	0.000160942	0.00180142	Acidobacteria	Blastocatellia_(Subgroup_4)	11-24	unclassified	unclassified	ASV536
4.41956	-6.01188	2.15085	-2.79512	0.00518806	0.0282904	Acidobacteria	Blastocatellia_(Subgroup_4)	Pyrinomonadales	Pyrinomonadaceae	RB41	ASV452
4.49925	-6.03807	1.5084	-4.00296	6.25561e-05	0.000831475	Acidobacteria	Acidobacteriia	Acidobacteriales	unclassified	unclassified	ASV446
9.58263	-6.13094	1.21454	-5.04796	4.46555e-07	9.82421e-06	Acidobacteria	Subgroup_6	unclassified	unclassified	unclassified	ASV180
5.05858	-6.20653	1.8625	-3.33236	0.000861114	0.00704347	Acidobacteria	Acidobacteriia	Subgroup_2	unclassified	unclassified	ASV420
12.4335	-6.33823	1.09661	-5.77983	7.47757e-09	3.18046e-07	Acidobacteria	Acidobacteriia	Subgroup_2	unclassified	unclassified	ASV167
6.29797	-6.52277	1.22442	-5.32722	9.97277e-08	2.6511e-06	Acidobacteria	Acidobacteriia	Acidobacteriales	unclassified	unclassified	ASV345
6.30203	-6.52318	2.31107	-2.82258	0.0047639	0.0266611	Acidobacteria	Subgroup_6	unclassified	unclassified	unclassified	ASV382
6.40527	-6.54721	1.32945	-4.92474	8.44737e-07	1.58512e-05	Acidobacteria	Acidobacteriia	Acidobacteriales	unclassified	unclassified	ASV336
7.41993	-6.75933	1.31564	-5.13766	2.7818e-07	6.5733e-06	Acidobacteria	Subgroup_6	unclassified	unclassified	unclassified	ASV287
14.2859	-7.70438	1.53376	-5.02321	5.08148e-07	1.08066e-05	Acidobacteria	Acidobacteriia	Acidobacteriales	unclassified	unclassified	ASV146
15.3372	-7.80672	0.874797	-8.92404	4.49594e-19	2.86841e-17	Acidobacteria	Acidobacteriia	Subgroup_2	unclassified	unclassified	ASV137
17.15	-7.96805	1.4331	-5.56001	2.69751e-08	9.05796e-07	Acidobacteria	Acidobacteriia	Solibacterales	Solibacteraceae_(Subgroup_3)	Candidatus Solibacter	ASV122
23.0723	-8.39606	0.808381	-10.3863	2.86347e-25	3.04482e-23	Acidobacteria	Holophagae	Subgroup_7	unclassified	unclassified	ASV88
19.7335	7.31732	1.16468	6.28267	3.32805e-10	1.6333e-08	Actinobacteria	Actinobacteria	Micrococcales	Micrococcaceae	Pseudarthrobacter	ASV95
5.48667	5.47037	1.7204	3.17971	0.00147422	0.0103755	Actinobacteria	Actinobacteria	Frankiales	Nakamurellaceae	Nakamurella	ASV356
4.92033	5.31445	1.92002	2.76791	0.00564164	0.0302468	Actinobacteria	Thermoleophilia	Gaiellales	unclassified	unclassified	ASV339
7.97809	5.22625	1.5465	3.37941	0.000726427	0.00617947	Actinobacteria	Actinobacteria	Streptomycetales	Streptomycetaceae	Kitasatospora	ASV286
22.2578	5.02587	1.30394	3.85437	0.000116029	0.00133395	Actinobacteria	Actinobacteria	Micrococcales	Microbacteriaceae	unclassified	ASV79
9.74126	4.45393	1.36509	3.26273	0.00110345	0.0085353	Actinobacteria	Actinobacteria	Micrococcales	Intrasporangiaceae	Terrabacter	ASV192
13.3376	3.51583	1.08227	3.24858	0.00115985	0.00880932	Actinobacteria	Actinobacteria	Streptomycetales	Streptomycetaceae	Streptomyces	ASV136
24.5774	2.47808	0.711414	3.48332	0.000495233	0.0045137	Actinobacteria	Actinobacteria	Micrococcales	Cellulomonadaceae	Cellulomonas	ASV68
15.6661	-3.70807	1.07818	-3.43919	0.00058346	0.00524292	Actinobacteria	Thermoleophilia	Gaiellales	unclassified	unclassified	ASV128
3.85879	-4.297	1.49811	-2.86828	0.00412715	0.0241571	Actinobacteria	Acidimicrobiia	unclassified	unclassified	unclassified	ASV496
3.65372	-5.73728	2.00396	-2.86297	0.00419688	0.0243419	Actinobacteria	Actinobacteria	Micromonosporales	Micromonosporaceae	unclassified	ASV546
6.67179	-5.33057	1.17958	-4.51905	6.21163e-06	0.00010429	Armatimonadetes	Fimbriimonadia	Fimbriimonadales	Fimbriimonadaceae	unclassified	ASV322
47.7407	25.1383	1.8724	13.4257	4.27457e-41	1.36359e-38	Bacteroidetes	Bacteroidia	Flavobacteriales	Flavobacteriaceae	Flavobacterium	ASV28
43.8072	25.0163	2.07079	12.0805	1.3384e-33	2.13475e-31	Bacteroidetes	Bacteroidia	Flavobacteriales	Flavobacteriaceae	Flavobacterium	ASV24
23.4577	24.1833	2.13717	11.3156	1.0988e-29	1.40207e-27	Bacteroidetes	Bacteroidia	Flavobacteriales	Flavobacteriaceae	Flavobacterium	ASV57
29.3031	23.8503	1.94634	12.2539	1.60039e-34	3.40349e-32	Bacteroidetes	Bacteroidia	Flavobacteriales	Flavobacteriaceae	Flavobacterium	ASV39
18.8283	23.064	2.3913	9.64495	5.16382e-22	3.66058e-20	Bacteroidetes	Bacteroidia	Flavobacteriales	Flavobacteriaceae	Flavobacterium	ASV106
143.047	10.1756	0.992703	10.2504	1.17878e-24	1.07438e-22	Bacteroidetes	Bacteroidia	Flavobacteriales	Flavobacteriaceae	Flavobacterium	ASV8
153.282	6.62739	1.32463	5.00322	5.63818e-07	1.16037e-05	Bacteroidetes	Bacteroidia	Flavobacteriales	Flavobacteriaceae	Flavobacterium	ASV6
23.5871	6.50089	1.14111	5.69699	1.21941e-08	4.80989e-07	Bacteroidetes	Bacteroidia	Flavobacteriales	Flavobacteriaceae	Flavobacterium	ASV89
10.3936	6.3927	2.08249	3.06974	0.00214246	0.0140917	Bacteroidetes	Bacteroidia	Flavobacteriales	Flavobacteriaceae	Flavobacterium	ASV179
10.3296	6.38319	1.77818	3.58974	0.000331009	0.0033773	Bacteroidetes	Bacteroidia	Cytophagales	Cytophagaceae	Cytophaga	ASV207
7.89718	5.99807	1.67556	3.57973	0.000343949	0.00342875	Bacteroidetes	Bacteroidia	Cytophagales	Spirosomaceae	Dyadobacter	ASV172
7.19723	5.86253	2.06682	2.8365	0.00456117	0.0257524	Bacteroidetes	Bacteroidia	Flavobacteriales	Flavobacteriaceae	Flavobacterium	ASV241
4.3425	5.1323	1.5298	3.35488	0.000793984	0.00657873	Bacteroidetes	Bacteroidia	Chitinophagales	Chitinophagaceae	unclassified	ASV435
3.89402	4.9753	1.92804	2.5805	0.00986566	0.0464409	Bacteroidetes	Bacteroidia	Cytophagales	Microscillaceae	unclassified	ASV493
3.58983	4.8583	1.53174	3.17175	0.00151525	0.0105079	Bacteroidetes	Bacteroidia	Chitinophagales	Chitinophagaceae	Filimonas	ASV476
28.4519	4.4448	1.49675	2.96963	0.00298158	0.0184684	Bacteroidetes	Bacteroidia	Flavobacteriales	Flavobacteriaceae	Flavobacterium	ASV67
13.6795	4.24046	1.23886	3.42288	0.00061962	0.00549052	Bacteroidetes	Bacteroidia	Sphingobacteriales	env.OPS_17	unclassified	ASV117
869.643	4.16844	0.760075	5.48426	4.15215e-08	1.26146e-06	Bacteroidetes	Bacteroidia	Flavobacteriales	Flavobacteriaceae	Flavobacterium	ASV1
168.921	2.92686	0.539357	5.42658	5.74438e-08	1.66587e-06	Bacteroidetes	Bacteroidia	Flavobacteriales	Flavobacteriaceae	Flavobacterium	ASV5
4.62674	-3.62544	1.23969	-2.92449	0.00345026	0.0207666	Bacteroidetes	Bacteroidia	Chitinophagales	Chitinophagaceae	unclassified	ASV412
11.166	-3.73067	1.35019	-2.76307	0.00572612	0.0304439	Bacteroidetes	Bacteroidia	Chitinophagales	Chitinophagaceae	unclassified	ASV190
4.68336	-4.53095	1.25927	-3.59807	0.000320594	0.0033773	Bacteroidetes	Bacteroidia	Sphingobacteriales	env.OPS_17	unclassified	ASV432
3.92622	-5.84039	1.62701	-3.58965	0.000331119	0.0033773	Bacteroidetes	Bacteroidia	Sphingobacteriales	env.OPS_17	unclassified	ASV531
7.58194	-4.06077	1.13847	-3.56687	0.000361272	0.0034923	Chloroflexi	Gitt-GS-136	unclassified	unclassified	unclassified	ASV267
21.0568	-4.17449	0.990115	-4.21617	2.48491e-05	0.000352305	Chloroflexi	AD3	unclassified	unclassified	unclassified	ASV76
1.87972	-4.77876	1.77774	-2.68811	0.00718571	0.0366758	Chloroflexi	Anaerolineae	unclassified	unclassified	unclassified	ASV949
20.4662	-4.92775	1.11606	-4.41529	1.00874e-05	0.000160894	Chloroflexi	AD3	unclassified	unclassified	unclassified	ASV75
12.2493	-5.03062	1.40215	-3.58779	0.000333496	0.0033773	Chloroflexi	TK10	unclassified	unclassified	unclassified	ASV181
7.3404	-6.74369	1.31813	-5.1161	3.11917e-07	7.10726e-06	Chloroflexi	Anaerolineae	Anaerolineales	Anaerolineaceae	unclassified	ASV292
16.5195	7.06068	1.31139	5.3841	7.28072e-08	2.01961e-06	Firmicutes	Bacilli	Bacillales	Paenibacillaceae	Paenibacillus	ASV123
9.82087	6.31194	1.98576	3.1786	0.00147989	0.0103755	Firmicutes	Bacilli	Bacillales	unclassified	unclassified	ASV148
36.7668	6.07995	1.2939	4.69895	2.61499e-06	4.63434e-05	Firmicutes	Bacilli	Bacillales	unclassified	unclassified	ASV43
6.46432	5.70699	1.95025	2.92629	0.0034303	0.0207666	Firmicutes	Bacilli	Bacillales	unclassified	unclassified	ASV320
6.4352	5.70278	2.1695	2.62861	0.00857343	0.0414383	Firmicutes	Bacilli	Bacillales	unclassified	unclassified	ASV199
12.6843	-3.25628	1.26246	-2.57932	0.00989963	0.0464409	Gemmatimonadetes	Gemmatimonadetes	Gemmatimonadales	Gemmatimonadaceae	unclassified	ASV144
7.91216	-4.7518	1.44146	-3.29652	0.000978888	0.00790545	Gemmatimonadetes	Gemmatimonadetes	Gemmatimonadales	Gemmatimonadaceae	Gemmatimonas	ASV248
6.80886	-5.70108	1.53868	-3.70519	0.000211236	0.00232359	Gemmatimonadetes	Gemmatimonadetes	Gemmatimonadales	Gemmatimonadaceae	unclassified	ASV303
6.65237	5.74879	1.82727	3.14611	0.00165459	0.0112301	Planctomycetes	Planctomycetacia	Planctomycetales	unclassified	unclassified	ASV275
3.88848	-4.74155	1.73318	-2.73576	0.00622368	0.0322822	Planctomycetes	Planctomycetacia	Gemmatales	Gemmataceae	unclassified	ASV528
3.80713	-5.79675	1.62121	-3.57558	0.000349453	0.00343002	Planctomycetes	Planctomycetacia	Gemmatales	Gemmataceae	unclassified	ASV524
12.9737	-6.02632	1.34239	-4.48924	7.14768e-06	0.000116929	Planctomycetes	Phycisphaerae	Tepidisphaerales	WD2101_soil_group	unclassified	ASV166
23.2911	24.1601	2.40951	10.027	1.16007e-23	9.25155e-22	Proteobacteria	Gammaproteobacteria	Enterobacteriales	Enterobacteriaceae	unclassified	ASV61
9.80812	22.9955	2.66378	8.63264	5.99534e-18	3.4773e-16	Proteobacteria	Gammaproteobacteria	Pseudomonadales	Pseudomonadaceae	Pseudomonas	ASV127
69.4469	9.13307	1.53399	5.95379	2.61999e-09	1.19397e-07	Proteobacteria	Gammaproteobacteria	Enterobacteriales	Enterobacteriaceae	unclassified	ASV18
27.4225	7.02652	1.2698	5.53356	3.13788e-08	1.00098e-06	Proteobacteria	Gammaproteobacteria	Betaproteobacteriales	Chitinibacteraceae	Chitinibacter	ASV63
78.6089	6.56539	1.17074	5.60791	2.04786e-08	7.25853e-07	Proteobacteria	Gammaproteobacteria	Pseudomonadales	Pseudomonadaceae	Pseudomonas	ASV15
10.4622	6.40365	1.95645	3.27309	0.00106379	0.00837902	Proteobacteria	Gammaproteobacteria	Betaproteobacteriales	Burkholderiaceae	Verminephrobacter	ASV120
8.81049	6.15386	2.0794	2.95944	0.00308198	0.0189068	Proteobacteria	Gammaproteobacteria	Betaproteobacteriales	Burkholderiaceae	Massilia	ASV237
8.19223	6.05095	1.94366	3.11317	0.00185092	0.0123009	Proteobacteria	Gammaproteobacteria	Betaproteobacteriales	Methylophilaceae	unclassified	ASV152
6.15543	5.63714	2.05038	2.74931	0.00597213	0.0312313	Proteobacteria	Gammaproteobacteria	Betaproteobacteriales	Burkholderiaceae	unclassified	ASV283
6.01071	5.60257	1.73318	3.23253	0.001227	0.00899798	Proteobacteria	Gammaproteobacteria	Betaproteobacteriales	Burkholderiaceae	unclassified	ASV304
5.42091	5.4551	1.54564	3.52935	0.00041659	0.00396693	Proteobacteria	Alphaproteobacteria	unclassified	unclassified	unclassified	ASV272
36.2476	5.24038	1.32022	3.96934	7.20734e-05	0.000919656	Proteobacteria	Gammaproteobacteria	Enterobacteriales	Enterobacteriaceae	unclassified	ASV40
26.0371	5.23421	1.19364	4.38509	1.15936e-05	0.000180408	Proteobacteria	Gammaproteobacteria	Betaproteobacteriales	Burkholderiaceae	Burkholderia-Caballeronia-Paraburkholderia	ASV74
22.9173	5.18872	1.12643	4.60636	4.09787e-06	7.06606e-05	Proteobacteria	Gammaproteobacteria	Betaproteobacteriales	Chitinibacteraceae	Silvimonas	ASV77
204.423	5.1402	0.973636	5.27939	1.29616e-07	3.3078e-06	Proteobacteria	Gammaproteobacteria	Pseudomonadales	Pseudomonadaceae	Pseudomonas	ASV3
313.802	5.02012	0.952634	5.26973	1.36627e-07	3.35261e-06	Proteobacteria	Gammaproteobacteria	Aeromonadales	Aeromonadaceae	Aeromonas	ASV2
38.1738	3.9768	1.13701	3.4976	0.000469467	0.00434087	Proteobacteria	Gammaproteobacteria	Betaproteobacteriales	Rhodocyclaceae	Uliginosibacterium	ASV32
30.8191	3.80005	1.16532	3.26095	0.00111039	0.0085353	Proteobacteria	Gammaproteobacteria	Betaproteobacteriales	Burkholderiaceae	Burkholderia-Caballeronia-Paraburkholderia	ASV60
60.5239	3.43329	1.06003	3.23887	0.00120006	0.00899798	Proteobacteria	Gammaproteobacteria	Betaproteobacteriales	Burkholderiaceae	Noviherbaspirillum	ASV22
18.5103	3.34111	0.994023	3.3612	0.000776044	0.00651468	Proteobacteria	Alphaproteobacteria	Rhizobiales	Rhizobiaceae	unclassified	ASV92
16.05	-2.1278	0.799116	-2.66269	0.00775185	0.0386381	Proteobacteria	Deltaproteobacteria	Myxococcales	Haliangiaceae	Haliangium	ASV116
9.94505	-2.64924	0.973655	-2.72092	0.00651005	0.0334952	Proteobacteria	Alphaproteobacteria	Elsterales	unclassified	unclassified	ASV219
23.9653	-2.77605	0.972541	-2.85442	0.00431148	0.0247813	Proteobacteria	Deltaproteobacteria	Myxococcales	Archangiaceae	Anaeromyxobacter	ASV81
18.0574	-2.81939	0.972816	-2.89817	0.00375349	0.0221734	Proteobacteria	Alphaproteobacteria	Rhizobiales	Xanthobacteraceae	unclassified	ASV111
7.98503	-3.62588	1.37529	-2.63644	0.00837809	0.0408032	Proteobacteria	Deltaproteobacteria	Myxococcales	Archangiaceae	Anaeromyxobacter	ASV247
10.2576	-4.09021	1.29901	-3.14872	0.00163988	0.0112301	Proteobacteria	Alphaproteobacteria	Elsterales	unclassified	unclassified	ASV198
9.15909	-4.60366	1.64295	-2.80207	0.00507765	0.0281699	Proteobacteria	Alphaproteobacteria	Rhizobiales	KF-JG30-B3	unclassified	ASV216
7.36818	-5.07246	1.68922	-3.00284	0.00267475	0.0167303	Proteobacteria	Alphaproteobacteria	Rhizobiales	Xanthobacteraceae	Rhodoplanes	ASV284
5.95079	-5.1022	1.67211	-3.05136	0.00227808	0.014681	Proteobacteria	Alphaproteobacteria	Elsterales	URHD0088	unclassified	ASV359
8.38913	-5.27923	1.69074	-3.12243	0.00179362	0.0120456	Proteobacteria	Gammaproteobacteria	Betaproteobacteriales	Burkholderiaceae	unclassified	ASV243
3.16529	-5.53027	2.01102	-2.74998	0.00595992	0.0312313	Proteobacteria	Alphaproteobacteria	Micropepsales	Micropepsaceae	unclassified	ASV628
3.57733	-5.70577	1.15016	-4.96085	7.01843e-07	1.3569e-05	Proteobacteria	Gammaproteobacteria	Gammaproteobacteria_Incertae_Sedis	Unknown_Family	Acidibacter	ASV572
6.51464	-5.81767	1.02271	-5.6885	1.28163e-08	4.80989e-07	Proteobacteria	Deltaproteobacteria	unclassified	unclassified	unclassified	ASV309
14.9069	-6.26	0.969745	-6.45531	1.07998e-10	5.74187e-09	Proteobacteria	Deltaproteobacteria	Myxococcales	Archangiaceae	Anaeromyxobacter	ASV135
40.3544	24.9105	1.78191	13.9797	2.07486e-44	1.32376e-41	Tenericutes	Mollicutes	Mycoplasmatales	Lumbricoplasmataceae	Candidatus Lumbricincola	ASV29
5.4553	4.82601	1.51441	3.18674	0.00143887	0.0103146	Verrucomicrobia	Verrucomicrobiae	unclassified	unclassified	unclassified	ASV385
28.1245	3.0924	0.78375	3.94565	7.95842e-05	0.000995583	Verrucomicrobia	Verrucomicrobiae	Verrucomicrobiales	Rubritaleaceae	Luteolibacter	ASV53
18.1801	-2.9282	1.10754	-2.64389	0.00819603	0.0402236	Verrucomicrobia	Verrucomicrobiae	Chthoniobacterales	Chthoniobacteraceae	Chthoniobacter	ASV112
129.426	-3.92044	0.974168	-4.0244	5.71201e-05	0.000775375	Verrucomicrobia	Verrucomicrobiae	Chthoniobacterales	Chthoniobacteraceae	Candidatus Udaeobacter	ASV9
16.0568	-3.96795	1.3636	-2.90992	0.00361526	0.0215564	Verrucomicrobia	Verrucomicrobiae	Chthoniobacterales	Chthoniobacteraceae	Candidatus Udaeobacter	ASV124
45.557	-4.13747	1.0602	-3.90253	9.51912e-05	0.00116792	Verrucomicrobia	Verrucomicrobiae	Chthoniobacterales	Chthoniobacteraceae	Candidatus Udaeobacter	ASV27
11.7385	-4.79368	1.58312	-3.028	0.00246175	0.0157059	Verrucomicrobia	Verrucomicrobiae	Pedosphaerales	Pedosphaeraceae	ADurb.Bin063-1	ASV182
7.3443	-5.11571	1.41238	-3.62205	0.000292275	0.00316053	Verrucomicrobia	Verrucomicrobiae	Pedosphaerales	Pedosphaeraceae	ADurb.Bin063-1	ASV269
3.60655	-5.71837	1.74329	-3.28021	0.00103729	0.00827242	Verrucomicrobia	Verrucomicrobiae	Pedosphaerales	Pedosphaeraceae	unclassified	ASV564
7.98448	-5.93367	1.85138	-3.20501	0.0013506	0.00979181	Verrucomicrobia	Verrucomicrobiae	Pedosphaerales	Pedosphaeraceae	ADurb.Bin063-1	ASV277
4.45648	-6.02405	1.513	-3.98153	6.84725e-05	0.00089154	Verrucomicrobia	Verrucomicrobiae	Pedosphaerales	Pedosphaeraceae	unclassified	ASV456
4.54431	-6.05226	1.87039	-3.23582	0.00121292	0.00899798	Verrucomicrobia	Verrucomicrobiae	Opitutales	Opitutaceae	Lacunisphaera	ASV437
9.15929	-7.06325	1.41349	-4.99704	5.8218e-07	1.16072e-05	Verrucomicrobia	Verrucomicrobiae	Pedosphaerales	Pedosphaeraceae	ADurb.Bin063-1	ASV222
6.04406	-4.609	1.50748	-3.05741	0.00223256	0.0145344	WPS-2	unclassified	unclassified	unclassified	unclassified	ASV352

## Sheet: ST3
Supplementary Table S3. Differential abundance in bacterial phyla ofsoil and gut and casts of earthworm species Aporrectodea caliginosa analyzed using negative binomial models as implemented in the package DESeq2
Positive and negative logFC indicate increases and decreases in earthworm samples over soil samples (soil-gut and soil-cast comparisons), and in cast over gut samples (gut-cast comparison)
We also give for each taxon its mean and dispersion across experimental treatments (soil, gut and casts)
baseMean	log2FoldChange	lfcSE	stat	pvalue	padjust	Phylum	taxon	comparison					taxon	Phylum	trat	mean	se
77.1962	20.3597	2.3211	8.77155	1.76228e-18	1.51997e-17	Tenericutes	ASV29	soil_vs_gut					ASV17	Acidobacteria	soil	1766.74	92.9823
1.96036	5.98843	1.80372	3.32004	0.000900058	0.00248416	Chlamydiae	ASV1235	soil_vs_gut					ASV17	Acidobacteria	gut	1633.88	765.3
267.379	4.10828	0.456786	8.99388	2.38654e-19	2.35244e-18	Firmicutes	ASV42	soil_vs_gut					ASV17	Acidobacteria	cast	369.25	65.2059
850.99	1.91975	0.304602	6.3025	2.92892e-10	1.83723e-09	Actinobacteria	ASV31	soil_vs_gut					ASV31	Actinobacteria	soil	563.684	24.5549
302.502	0.680798	0.277111	2.45677	0.0140193	0.0322444	Planctomycetes	ASV16	soil_vs_gut					ASV31	Actinobacteria	gut	2132.12	436.248
787.704	-1.65594	0.389673	-4.24955	2.14196e-05	8.21083e-05	Acidobacteria	ASV17	soil_vs_gut					ASV31	Actinobacteria	cast	597.5	63.0287
10.818	-3.29473	0.791371	-4.16332	3.13653e-05	0.000113906	Armatimonadetes	ASV322	soil_vs_gut					ASV322	Armatimonadetes	soil	38.4211	4.03806
1.83325	-5.10822	1.4833	-3.44383	0.000573538	0.00172061	Elusimicrobia	ASV1547	soil_vs_gut					ASV322	Armatimonadetes	gut	14.875	9.88765
77.1962	6.65838	2.25726	2.94976	0.0031802	0.00843977	Tenericutes	ASV29	gut_vs_cast					ASV322	Armatimonadetes	cast	1.05	0.825498
4019.81	5.33711	0.385151	13.8572	1.15107e-43	2.64747e-42	Bacteroidetes	ASV1	gut_vs_cast					ASV1	Bacteroidetes	soil	585.316	55.126
5243.02	2.43131	0.256081	9.49429	2.21714e-21	2.54971e-20	Proteobacteria	ASV2	gut_vs_cast					ASV1	Bacteroidetes	gut	608.125	241.166
985.193	1.08565	0.228394	4.75343	1.99999e-06	8.62494e-06	Verrucomicrobia	ASV9	gut_vs_cast					ASV1	Bacteroidetes	cast	4591.25	699.267
302.502	-0.717717	0.275965	-2.60075	0.00930204	0.0221324	Planctomycetes	ASV16	gut_vs_cast					ASV1235	Chlamydiae	soil	0.157895	0.157895
247.028	-2.05719	0.335341	-6.13463	8.53579e-10	4.53053e-09	Chloroflexi	ASV38	gut_vs_cast					ASV1235	Chlamydiae	gut	22.625	9.04342
8.41523	-3.04876	0.839009	-3.63376	0.000279321	0.000876051	WPS-2	ASV352	gut_vs_cast					ASV1235	Chlamydiae	cast	0.1	0.1
5.56009	-4.46397	1.02223	-4.36689	1.26026e-05	5.11516e-05	Rokubacteria	ASV217	gut_vs_cast					ASV38	Chloroflexi	soil	551.737	30.4939
1.96036	-4.72186	1.78795	-2.64094	0.00826761	0.0203737	Chlamydiae	ASV1235	gut_vs_cast					ASV38	Chloroflexi	gut	1059.5	368.664
77.1962	27.018	1.76586	15.3002	7.62496e-53	2.63061e-51	Tenericutes	ASV29	soil_vs_cast					ASV38	Chloroflexi	cast	51.75	9.23462
4019.81	4.52034	0.293859	15.3827	2.14003e-53	1.47662e-51	Bacteroidetes	ASV1	soil_vs_cast					ASV506	Cyanobacteria	soil	9.52632	2.07233
267.379	4.31822	0.349205	12.3659	3.99909e-35	6.89843e-34	Firmicutes	ASV42	soil_vs_cast					ASV506	Cyanobacteria	gut	35.5	19.7882
5243.02	2.33667	0.195963	11.924	8.8703e-33	1.2241e-31	Proteobacteria	ASV2	soil_vs_cast					ASV506	Cyanobacteria	cast	3.95	1.21715
850.99	1.46772	0.231855	6.33031	2.44668e-10	1.68821e-09	Actinobacteria	ASV31	soil_vs_cast					ASV471	Dependentiae	soil	5	1.28646
985.193	0.708179	0.174491	4.05855	4.93776e-05	0.000170353	Verrucomicrobia	ASV9	soil_vs_cast					ASV471	Dependentiae	gut	27	14.2328
787.704	-1.07956	0.296028	-3.64684	0.000265489	0.000872321	Acidobacteria	ASV17	soil_vs_cast					ASV471	Dependentiae	cast	2.2	0.904957
36.4666	-1.54711	0.465222	-3.32552	0.000882537	0.00248416	Gemmatimonadetes	ASV144	soil_vs_cast					ASV1547	Elusimicrobia	soil	6.52632	1.43549
247.028	-2.07077	0.25808	-8.02372	1.0259e-15	7.86525e-15	Chloroflexi	ASV38	soil_vs_cast					ASV1547	Elusimicrobia	gut	0	0
1.83325	-2.98944	1.10176	-2.71333	0.00666102	0.0170226	Elusimicrobia	ASV1547	soil_vs_cast					ASV1547	Elusimicrobia	cast	0.25	0.25
8.41523	-3.71042	0.677655	-5.47539	4.3656e-08	2.00817e-07	WPS-2	ASV352	soil_vs_cast					ASV1100	FCPU426	soil	4.73684	1.40767
10.818	-4.1184	0.659192	-6.24764	4.16697e-10	2.39601e-09	Armatimonadetes	ASV322	soil_vs_cast					ASV1100	FCPU426	gut	1.625	1.625
5.56009	-5.03789	0.82583	-6.1004	1.05806e-09	5.2147e-09	Rokubacteria	ASV217	soil_vs_cast					ASV1100	FCPU426	cast	0	0
													ASV1622	Fibrobacteres	soil	5.52632	1.48357
													ASV1622	Fibrobacteres	gut	2.75	2.75
													ASV1622	Fibrobacteres	cast	4.9	2.12986
													ASV42	Firmicutes	soil	34.5263	5.01773
													ASV42	Firmicutes	gut	659	141.427
													ASV42	Firmicutes	cast	255.05	47.6247
													ASV144	Gemmatimonadetes	soil	83.4737	8.24209
													ASV144	Gemmatimonadetes	gut	154.375	70.1979
													ASV144	Gemmatimonadetes	cast	12.15	3.26164
													ASV2044	Kiritimatiellaeota	soil	0	0
													ASV2044	Kiritimatiellaeota	gut	4.25	3.47311
													ASV2044	Kiritimatiellaeota	cast	0	0
													ASV975	Latescibacteria	soil	2	1.11345
													ASV975	Latescibacteria	gut	17.875	9.11129
													ASV975	Latescibacteria	cast	0.8	0.550598
													ASV371	Nitrospirae	soil	2.52632	0.792392
													ASV371	Nitrospirae	gut	33.375	22.8559
													ASV371	Nitrospirae	cast	0	0
													ASV16	Planctomycetes	soil	422.053	42.522
													ASV16	Planctomycetes	gut	1244.38	392.252
													ASV16	Planctomycetes	cast	169	24.4246
													ASV2	Proteobacteria	soil	2859.21	138.475
													ASV2	Proteobacteria	gut	4619.5	1423.33
													ASV2	Proteobacteria	cast	5127	492.223
													ASV217	Rokubacteria	soil	16	2.53744
													ASV217	Rokubacteria	gut	37.25	24.0065
													ASV217	Rokubacteria	cast	0	0
													ASV5321	Spirochaetes	soil	0.421053	0.299276
													ASV5321	Spirochaetes	gut	0	0
													ASV5321	Spirochaetes	cast	0	0
													ASV29	Tenericutes	soil	0	0
													ASV29	Tenericutes	gut	20.5	14.1661
													ASV29	Tenericutes	cast	96.3	40.7872
													ASV9	Verrucomicrobia	soil	1189.68	52.8498
													ASV9	Verrucomicrobia	gut	1529.62	468.221
													ASV9	Verrucomicrobia	cast	768.65	94.0892
													ASV352	WPS-2	soil	24.6842	3.1195
													ASV352	WPS-2	gut	35.75	14.5771
													ASV352	WPS-2	cast	0.9	0.717818

## Sheet: ST4
Supplementary Table S4. Differential abundance in bacterial amplicon sequence variants (ASVs) ofsoil and gut and casts of earthworm species Aporrectodea caliginosa analyzed using negative binomial models as implemented in the package DESeq2
Positive and negative logFC indicate increases and decreases in earthworm samples over soil samples (soil-gut and soil-cast comparisons), and in cast over gut samples (gut-cast comparison)
We also give for each taxon its mean and dispersion across experimental treatments (soil, gut and casts)
																ASV	Phylum	Class	Order	Family	Genus	trat	mean	se
baseMean	log2FoldChange	lfcSE	stat	pvalue	padjust	Phylum	Class	Order	Family	Genus	ASV	comparison				ASV1010	Acidobacteria	Acidobacteriia	Acidobacteriales	Acidobacteriaceae_(Subgroup_1)	Acidipila	soil	0	0
40.3544	22.3191	2.46159	9.06695	1.224e-19	8.5925e-17	Tenericutes	Mollicutes	Mycoplasmatales	Lumbricoplasmataceae	Cd. Lumbricincola	ASV29	soil_vs_gut				ASV1010	Acidobacteria	Acidobacteriia	Acidobacteriales	Acidobacteriaceae_(Subgroup_1)	Acidipila	gut	3.125	3.125
10.4622	8.13162	2.4282	3.34883	0.00081152	0.028327	Proteobacteria	Gammaproteobacteria	Betaproteobacteriales	Burkholderiaceae	Verminephrobacter	ASV120	soil_vs_gut				ASV1010	Acidobacteria	Acidobacteriia	Acidobacteriales	Acidobacteriaceae_(Subgroup_1)	Acidipila	cast	2.4	1.31269
19.7335	6.70683	1.59245	4.21164	2.53518e-05	0.00152545	Actinobacteria	Actinobacteria	Micrococcales	Micrococcaceae	Pseudarthrobacter	ASV95	soil_vs_gut				ASV1016	Acidobacteria	Holophagae	Subgroup_7	unclassified	unclassified	soil	0	0
143.047	6.52091	1.17553	5.54721	2.90264e-08	3.33434e-06	Bacteroidetes	Bacteroidia	Flavobacteriales	Flavobacteriaceae	Flavobacterium	ASV8	soil_vs_gut				ASV1016	Acidobacteria	Holophagae	Subgroup_7	unclassified	unclassified	gut	7.25	5.04179
60.2831	-1.83089	0.504585	-3.6285	0.000285075	0.0123363	Proteobacteria	Gammaproteobacteria	Betaproteobacteriales	Burkholderiaceae	Burkholderia-Caballeronia-Paraburkholderia	ASV26	soil_vs_gut				ASV1016	Acidobacteria	Holophagae	Subgroup_7	unclassified	unclassified	cast	0.7	0.487205
23.9653	-4.39241	1.37676	-3.1904	0.00142076	0.0472439	Proteobacteria	Deltaproteobacteria	Myxococcales	Archangiaceae	Anaeromyxobacter	ASV81	soil_vs_gut				ASV102	Acidobacteria	Acidobacteriia	Subgroup_2	unclassified	unclassified	soil	31.8947	3.04056
14.9069	-4.77434	1.20917	-3.94844	7.8661e-05	0.00407361	Proteobacteria	Deltaproteobacteria	Myxococcales	Archangiaceae	Anaeromyxobacter	ASV135	soil_vs_gut				ASV102	Acidobacteria	Acidobacteriia	Subgroup_2	unclassified	unclassified	gut	30.375	20.9045
137.553	-5.20909	0.89188	-5.84057	5.20223e-09	6.99312e-07	Proteobacteria	Gammaproteobacteria	Betaproteobacteriales	Burkholderiaceae	Massilia	ASV10	soil_vs_gut				ASV102	Acidobacteria	Acidobacteriia	Subgroup_2	unclassified	unclassified	cast	0.45	0.45
21.365	-5.4875	1.52629	-3.59533	0.00032398	0.0132916	Bacteroidetes	Bacteroidia	Sphingobacteriales	Sphingobacteriaceae	unclassified	ASV94	soil_vs_gut				ASV103	Acidobacteria	Subgroup_6	unclassified	unclassified	unclassified	soil	30.7368	5.09836
3.57733	-6.17975	1.71589	-3.60148	0.000316413	0.013066	Proteobacteria	Gammaproteobacteria	Gammaproteobacteria_Incertae_Sedis	Unknown_Family	Acidibacter	ASV572	soil_vs_gut				ASV103	Acidobacteria	Subgroup_6	unclassified	unclassified	unclassified	gut	3.375	2.7054
12.2063	-6.24186	1.70505	-3.6608	0.000251424	0.011266	Bacteroidetes	Bacteroidia	Chitinophagales	Chitinophagaceae	Ferruginibacter	ASV162	soil_vs_gut				ASV103	Acidobacteria	Subgroup_6	unclassified	unclassified	unclassified	cast	13.1	4.07812
6.36428	-6.80574	1.9866	-3.42582	0.000612944	0.0223849	Proteobacteria	Deltaproteobacteria	Myxococcales	Phaselicystidaceae	Phaselicystis	ASV335	soil_vs_gut				ASV1031	Acidobacteria	Acidobacteriia	Acidobacteriales	unclassified	unclassified	soil	3.78947	2.65852
6.29797	-6.99672	1.8168	-3.85113	0.000117575	0.00584914	Acidobacteria	Acidobacteriia	Acidobacteriales	unclassified	unclassified	ASV345	soil_vs_gut				ASV1031	Acidobacteria	Acidobacteriia	Acidobacteriales	unclassified	unclassified	gut	0	0
6.40527	-7.02116	1.96416	-3.57463	0.000350724	0.014296	Acidobacteria	Acidobacteriia	Acidobacteriales	unclassified	unclassified	ASV336	soil_vs_gut				ASV1031	Acidobacteria	Acidobacteriia	Acidobacteriales	unclassified	unclassified	cast	0	0
7.3404	-7.21765	1.94793	-3.70529	0.000211147	0.00973744	Chloroflexi	Anaerolineae	Anaerolineales	Anaerolineaceae	unclassified	ASV292	soil_vs_gut				ASV1039	Acidobacteria	Acidobacteriia	Acidobacteriales	unclassified	unclassified	soil	2.05263	1.26693
7.41993	-7.23328	1.94443	-3.72001	0.000199216	0.00925476	Acidobacteria	Subgroup_6	unclassified	unclassified	unclassified	ASV287	soil_vs_gut				ASV1039	Acidobacteria	Acidobacteriia	Acidobacteriales	unclassified	unclassified	gut	4	4
9.94505	-7.34724	1.41177	-5.20428	1.94753e-07	1.81192e-05	Proteobacteria	Alphaproteobacteria	Elsterales	unclassified	unclassified	ASV219	soil_vs_gut				ASV1039	Acidobacteria	Acidobacteriia	Acidobacteriales	unclassified	unclassified	cast	0	0
9.15929	-7.5372	2.08122	-3.62153	0.00029287	0.0125874	Verrucomicrobia	Verrucomicrobiae	Pedosphaerales	Pedosphaeraceae	ADurb.Bin063-1	ASV222	soil_vs_gut				ASV1058	Acidobacteria	Subgroup_6	unclassified	unclassified	unclassified	soil	0	0
14.2859	-8.17834	2.24886	-3.63666	0.000276193	0.012118	Acidobacteria	Acidobacteriia	Acidobacteriales	unclassified	unclassified	ASV146	soil_vs_gut				ASV1058	Acidobacteria	Subgroup_6	unclassified	unclassified	unclassified	gut	0	0
15.3372	-8.28068	1.33194	-6.217	5.06757e-10	9.14768e-08	Acidobacteria	Acidobacteriia	Subgroup_2	unclassified	unclassified	ASV137	soil_vs_gut				ASV1058	Acidobacteria	Subgroup_6	unclassified	unclassified	unclassified	cast	3.45	1.9914
20.7685	-8.40362	1.86477	-4.50651	6.59015e-06	0.000473143	Proteobacteria	Gammaproteobacteria	Betaproteobacteriales	Burkholderiaceae	Duganella	ASV100	soil_vs_gut				ASV1063	Acidobacteria	Subgroup_6	unclassified	unclassified	unclassified	soil	0.947368	0.947368
17.15	-8.442	2.10595	-4.00865	6.10679e-05	0.00335502	Acidobacteria	Acidobacteriia	Solibacterales	Solibacteraceae_(Subgroup_3)	Cd. Solibacter	ASV122	soil_vs_gut				ASV1063	Acidobacteria	Subgroup_6	unclassified	unclassified	unclassified	gut	4.625	4.625
23.0723	-8.87001	1.24193	-7.14211	9.19098e-13	2.80628e-10	Acidobacteria	Holophagae	Subgroup_7	unclassified	unclassified	ASV88	soil_vs_gut				ASV1063	Acidobacteria	Subgroup_6	unclassified	unclassified	unclassified	cast	0.7	0.7
43.8072	25.2415	2.67341	9.4417	3.6678e-21	3.8622e-18	Bacteroidetes	Bacteroidia	Flavobacteriales	Flavobacteriaceae	Flavobacterium	ASV24	gut_vs_cast				ASV1074	Acidobacteria	Acidobacteriia	Acidobacteriales	unclassified	unclassified	soil	2.89474	1.05934
23.4577	24.3978	2.79738	8.72165	2.74174e-18	1.57476e-15	Bacteroidetes	Bacteroidia	Flavobacteriales	Flavobacteriaceae	Flavobacterium	ASV57	gut_vs_cast				ASV1074	Acidobacteria	Acidobacteriia	Acidobacteriales	unclassified	unclassified	gut	0	0
18.8283	24.3661	3.18575	7.64846	2.03408e-14	8.142e-12	Bacteroidetes	Bacteroidia	Flavobacteriales	Flavobacteriaceae	Flavobacterium	ASV106	gut_vs_cast				ASV1074	Acidobacteria	Acidobacteriia	Acidobacteriales	unclassified	unclassified	cast	0	0
15.716	23.5431	3.40593	6.91238	4.76589e-12	1.23267e-09	Proteobacteria	Gammaproteobacteria	Enterobacteriales	Enterobacteriaceae	unclassified	ASV61	gut_vs_cast				ASV1075	Acidobacteria	Subgroup_6	unclassified	unclassified	unclassified	soil	3.63158	1.72903
7.11899	22.5711	3.37855	6.68071	2.37795e-11	5.36566e-09	Proteobacteria	Gammaproteobacteria	Betaproteobacteriales	Burkholderiaceae	Massilia	ASV297	gut_vs_cast				ASV1075	Acidobacteria	Subgroup_6	unclassified	unclassified	unclassified	gut	0	0
3.30096	21.5673	4.20159	5.13311	2.84987e-07	2.60949e-05	Proteobacteria	Gammaproteobacteria	Pseudomonadales	Pseudomonadaceae	Pseudomonas	ASV121	gut_vs_cast				ASV1075	Acidobacteria	Subgroup_6	unclassified	unclassified	unclassified	cast	0	0
153.282	11.5178	1.63237	7.0559	1.71491e-12	4.92491e-10	Bacteroidetes	Bacteroidia	Flavobacteriales	Flavobacteriaceae	Flavobacterium	ASV6	gut_vs_cast				ASV1083	Acidobacteria	Acidobacteriia	Solibacterales	Solibacteraceae_(Subgroup_3)	Bryobacter	soil	0	0
69.4469	10.3854	1.85769	5.5905	2.26411e-08	2.64901e-06	Proteobacteria	Gammaproteobacteria	Enterobacteriales	Enterobacteriaceae	unclassified	ASV18	gut_vs_cast				ASV1083	Acidobacteria	Acidobacteriia	Solibacterales	Solibacteraceae_(Subgroup_3)	Bryobacter	gut	8.5	7.29971
47.7407	9.84478	2.37258	4.14939	3.3336e-05	0.0019147	Bacteroidetes	Bacteroidia	Flavobacteriales	Flavobacteriaceae	Flavobacterium	ASV28	gut_vs_cast				ASV1083	Acidobacteria	Acidobacteriia	Solibacterales	Solibacteraceae_(Subgroup_3)	Bryobacter	cast	0	0
29.3031	9.14086	2.5046	3.64963	0.000262619	0.011603	Bacteroidetes	Bacteroidia	Flavobacteriales	Flavobacteriaceae	Flavobacterium	ASV39	gut_vs_cast				ASV1132	Acidobacteria	Subgroup_6	unclassified	unclassified	unclassified	soil	0	0
27.4225	9.03854	1.45837	6.1977	5.7295e-10	1.00553e-07	Proteobacteria	Gammaproteobacteria	Betaproteobacteriales	Chitinibacteraceae	Chitinibacter	ASV63	gut_vs_cast				ASV1132	Acidobacteria	Subgroup_6	unclassified	unclassified	unclassified	gut	1.625	1.625
26.0371	8.94448	1.44615	6.18503	6.20901e-10	1.06023e-07	Proteobacteria	Gammaproteobacteria	Betaproteobacteriales	Burkholderiaceae	Burkholderia-Caballeronia-Paraburkholderia	ASV74	gut_vs_cast				ASV1132	Acidobacteria	Subgroup_6	unclassified	unclassified	unclassified	cast	2.5	1.59027
21.365	8.5269	1.51092	5.64351	1.66616e-08	2.06408e-06	Bacteroidetes	Bacteroidia	Sphingobacteriales	Sphingobacteriaceae	unclassified	ASV94	gut_vs_cast				ASV1162	Acidobacteria	Subgroup_6	unclassified	unclassified	unclassified	soil	0.842105	0.842105
16.5195	8.31362	1.53523	5.41523	6.12101e-08	6.66768e-06	Firmicutes	Bacilli	Bacillales	Paenibacillaceae	Paenibacillus	ASV123	gut_vs_cast				ASV1162	Acidobacteria	Subgroup_6	unclassified	unclassified	unclassified	gut	5.625	3.94578
12.6488	7.78248	1.95064	3.9897	6.61568e-05	0.00360327	Verrucomicrobia	Verrucomicrobiae	Chthoniobacterales	Chthoniobacteraceae	Cd. Udaeobacter	ASV156	gut_vs_cast				ASV1162	Acidobacteria	Subgroup_6	unclassified	unclassified	unclassified	cast	0	0
313.802	7.69906	1.15126	6.68752	2.26977e-11	5.31125e-09	Proteobacteria	Gammaproteobacteria	Aeromonadales	Aeromonadaceae	Aeromonas	ASV2	gut_vs_cast				ASV1165	Acidobacteria	Subgroup_6	unclassified	unclassified	unclassified	soil	0	0
10.3296	7.63605	2.30211	3.31697	0.000909987	0.0310802	Bacteroidetes	Bacteroidia	Cytophagales	Cytophagaceae	Cytophaga	ASV207	gut_vs_cast				ASV1165	Acidobacteria	Subgroup_6	unclassified	unclassified	unclassified	gut	7.625	5.01404
11.6002	7.62781	1.82215	4.18617	2.83701e-05	0.00165965	Bacteroidetes	Bacteroidia	Sphingobacteriales	NS11-12_marine_group	unclassified	ASV153	gut_vs_cast				ASV1165	Acidobacteria	Subgroup_6	unclassified	unclassified	unclassified	cast	0	0
12.2063	7.35094	1.6924	4.34349	1.40233e-05	0.000869113	Bacteroidetes	Bacteroidia	Chitinophagales	Chitinophagaceae	Ferruginibacter	ASV162	gut_vs_cast				ASV1209	Acidobacteria	Acidobacteriia	Acidobacteriales	unclassified	unclassified	soil	2.36842	1.30498
7.89718	7.2509	2.16253	3.35297	0.000799501	0.0280625	Bacteroidetes	Bacteroidia	Cytophagales	Spirosomaceae	Dyadobacter	ASV172	gut_vs_cast				ASV1209	Acidobacteria	Acidobacteriia	Acidobacteriales	unclassified	unclassified	gut	0	0
137.553	7.0243	0.885309	7.9343	2.1169e-15	1.02881e-12	Proteobacteria	Gammaproteobacteria	Betaproteobacteriales	Burkholderiaceae	Massilia	ASV10	gut_vs_cast				ASV1209	Acidobacteria	Acidobacteriia	Acidobacteriales	unclassified	unclassified	cast	0.65	0.65
869.643	6.85687	0.849703	8.06973	7.04538e-16	3.70939e-13	Bacteroidetes	Bacteroidia	Flavobacteriales	Flavobacteriaceae	Flavobacterium	ASV1	gut_vs_cast				ASV1212	Acidobacteria	Acidobacteriia	Acidobacteriales	Koribacteraceae	Candidatus_Koribacter	soil	3.05263	1.02733
8.09948	6.82575	2.02481	3.37106	0.000748796	0.0265781	Bacteroidetes	Bacteroidia	Chitinophagales	Chitinophagaceae	Sediminibacterium	ASV260	gut_vs_cast				ASV1212	Acidobacteria	Acidobacteriia	Acidobacteriales	Koribacteraceae	Candidatus_Koribacter	gut	0	0
5.4553	6.68731	1.94558	3.43718	0.000587813	0.0218459	Verrucomicrobia	Verrucomicrobiae	unclassified	unclassified	unclassified	ASV385	gut_vs_cast				ASV1212	Acidobacteria	Acidobacteriia	Acidobacteriales	Koribacteraceae	Candidatus_Koribacter	cast	0	0
20.7685	6.29046	1.85537	3.39041	0.000697885	0.0253405	Proteobacteria	Gammaproteobacteria	Betaproteobacteriales	Burkholderiaceae	Duganella	ASV100	gut_vs_cast				ASV122	Acidobacteria	Acidobacteriia	Solibacterales	Solibacteraceae_(Subgroup_3)	Candidatus_Solibacter	soil	39.4737	7.78602
22.2578	6.0115	1.66173	3.61762	0.000297321	0.0126072	Actinobacteria	Actinobacteria	Micrococcales	Microbacteriaceae	unclassified	ASV79	gut_vs_cast				ASV122	Acidobacteria	Acidobacteriia	Solibacterales	Solibacteraceae_(Subgroup_3)	Candidatus_Solibacter	gut	0	0
204.423	5.7562	1.2141	4.74112	2.12538e-06	0.000167852	Proteobacteria	Gammaproteobacteria	Pseudomonadales	Pseudomonadaceae	Pseudomonas	ASV3	gut_vs_cast				ASV122	Acidobacteria	Acidobacteriia	Solibacterales	Solibacteraceae_(Subgroup_3)	Candidatus_Solibacter	cast	0	0
78.6089	5.67686	1.44406	3.93117	8.45329e-05	0.0043421	Proteobacteria	Gammaproteobacteria	Pseudomonadales	Pseudomonadaceae	Pseudomonas	ASV15	gut_vs_cast				ASV1223	Acidobacteria	Acidobacteriia	Acidobacteriales	unclassified	unclassified	soil	2.31579	0.868731
60.5239	5.45908	1.36	4.01403	5.9691e-05	0.00330814	Proteobacteria	Gammaproteobacteria	Betaproteobacteriales	Burkholderiaceae	Noviherbaspirillum	ASV22	gut_vs_cast				ASV1223	Acidobacteria	Acidobacteriia	Acidobacteriales	unclassified	unclassified	gut	1.625	1.625
23.5871	5.40243	1.31815	4.09848	4.15869e-05	0.00232519	Bacteroidetes	Bacteroidia	Flavobacteriales	Flavobacteriaceae	Flavobacterium	ASV89	gut_vs_cast				ASV1223	Acidobacteria	Acidobacteriia	Acidobacteriales	unclassified	unclassified	cast	0	0
9.94505	5.1941	1.41077	3.68174	0.00023165	0.0105292	Proteobacteria	Alphaproteobacteria	Elsterales	unclassified	unclassified	ASV219	gut_vs_cast				ASV1228	Acidobacteria	Acidobacteriia	Acidobacteriales	unclassified	unclassified	soil	3	1.78853
12.2717	4.40788	0.99375	4.4356	9.18161e-06	0.000637466	Proteobacteria	Alphaproteobacteria	Rhizobiales	Rhizobiaceae	Allorhizobium-Neorhizobium-Pararhizobium-Rhizobium	ASV159	gut_vs_cast				ASV1228	Acidobacteria	Acidobacteriia	Acidobacteriales	unclassified	unclassified	gut	0	0
68.8664	4.27307	1.26334	3.38237	0.000718645	0.0259131	Proteobacteria	Gammaproteobacteria	Betaproteobacteriales	Burkholderiaceae	Burkholderia-Caballeronia-Paraburkholderia	ASV21	gut_vs_cast				ASV1228	Acidobacteria	Acidobacteriia	Acidobacteriales	unclassified	unclassified	cast	0	0
143.047	4.1072	1.07053	3.8366	0.000124748	0.00615749	Bacteroidetes	Bacteroidia	Flavobacteriales	Flavobacteriaceae	Flavobacterium	ASV8	gut_vs_cast				ASV1243	Acidobacteria	Subgroup_6	unclassified	unclassified	unclassified	soil	0	0
34.5093	4.04161	1.02239	3.95309	7.715e-05	0.00407361	Bacteroidetes	Bacteroidia	Chitinophagales	Chitinophagaceae	Ferruginibacter	ASV50	gut_vs_cast				ASV1243	Acidobacteria	Subgroup_6	unclassified	unclassified	unclassified	gut	7	4.72077
168.921	3.48197	0.614368	5.66757	1.44836e-08	1.83015e-06	Bacteroidetes	Bacteroidia	Flavobacteriales	Flavobacteriaceae	Flavobacterium	ASV5	gut_vs_cast				ASV1243	Acidobacteria	Subgroup_6	unclassified	unclassified	unclassified	cast	0	0
60.2831	2.97756	0.4994	5.96227	2.48749e-09	3.49244e-07	Proteobacteria	Gammaproteobacteria	Betaproteobacteriales	Burkholderiaceae	Burkholderia-Caballeronia-Paraburkholderia	ASV26	gut_vs_cast				ASV1268	Acidobacteria	Acidobacteriia	Subgroup_2	unclassified	unclassified	soil	1.21053	1.21053
31.3781	-4.46459	1.37513	-3.24666	0.00116768	0.0390338	Acidobacteria	Acidobacteriia	Acidobacteriales	unclassified	unclassified	ASV49	gut_vs_cast				ASV1268	Acidobacteria	Acidobacteriia	Subgroup_2	unclassified	unclassified	gut	4	2.67929
20.4662	-4.7984	1.36753	-3.50881	0.000450123	0.0176791	Chloroflexi	AD3	unclassified	unclassified	unclassified	ASV75	gut_vs_cast				ASV1268	Acidobacteria	Acidobacteriia	Subgroup_2	unclassified	unclassified	cast	0	0
17.2753	-4.95733	1.27771	-3.87986	0.000104515	0.00528261	Acidobacteria	Acidobacteriia	Subgroup_2	unclassified	unclassified	ASV102	gut_vs_cast				ASV1271	Acidobacteria	Subgroup_6	unclassified	unclassified	unclassified	soil	1.26316	1.26316
7.74956	-5.07396	1.3134	-3.86322	0.000111901	0.00561103	Acidobacteria	Acidobacteriia	Acidobacteriales	unclassified	unclassified	ASV229	gut_vs_cast				ASV1271	Acidobacteria	Subgroup_6	unclassified	unclassified	unclassified	gut	3.875	3.875
10.6264	-5.26817	1.48933	-3.53727	0.000404289	0.0162694	Acidobacteria	Acidobacteriia	Acidobacteriales	unclassified	unclassified	ASV171	gut_vs_cast				ASV1271	Acidobacteria	Subgroup_6	unclassified	unclassified	unclassified	cast	0	0
16.0568	-5.37266	1.69436	-3.17091	0.0015196	0.0494889	Verrucomicrobia	Verrucomicrobiae	Chthoniobacterales	Chthoniobacteraceae	Cd. Udaeobacter	ASV124	gut_vs_cast				ASV1291	Acidobacteria	Holophagae	Subgroup_7	unclassified	unclassified	soil	0.578947	0.578947
15.6661	-5.56739	1.23143	-4.52107	6.15276e-06	0.000449421	Actinobacteria	Thermoleophilia	Gaiellales	unclassified	unclassified	ASV128	gut_vs_cast				ASV1291	Acidobacteria	Holophagae	Subgroup_7	unclassified	unclassified	gut	3.75	3.75
11.0865	-5.65095	1.6937	-3.33645	0.000848561	0.0294572	Acidobacteria	Acidobacteriia	Acidobacteriales	unclassified	unclassified	ASV163	gut_vs_cast				ASV1291	Acidobacteria	Holophagae	Subgroup_7	unclassified	unclassified	cast	0.65	0.65
10.8324	-5.66642	1.50865	-3.75595	0.000172688	0.00826546	Acidobacteria	Acidobacteriia	Acidobacteriales	unclassified	unclassified	ASV161	gut_vs_cast				ASV1314	Acidobacteria	Acidobacteriia	Acidobacteriales	Acidobacteriaceae_(Subgroup_1)	Granulicella	soil	2.84211	2.1265
12.6843	-5.66852	1.51277	-3.7471	0.000178889	0.00849791	Gemmatimonadetes	Gemmatimonadetes	Gemmatimonadales	Gemmatimonadaceae	unclassified	ASV144	gut_vs_cast				ASV1314	Acidobacteria	Acidobacteriia	Acidobacteriales	Acidobacteriaceae_(Subgroup_1)	Granulicella	gut	0	0
7.44632	-5.90681	1.61744	-3.65194	0.000260263	0.0115798	Rokubacteria	NC10	Rokubacteriales	unclassified	unclassified	ASV217	gut_vs_cast				ASV1314	Acidobacteria	Acidobacteriia	Acidobacteriales	Acidobacteriaceae_(Subgroup_1)	Granulicella	cast	0	0
9.35882	-6.31276	1.90319	-3.31695	0.000910073	0.0310802	Acidobacteria	Subgroup_6	unclassified	unclassified	unclassified	ASV176	gut_vs_cast				ASV1317	Acidobacteria	Subgroup_6	unclassified	unclassified	unclassified	soil	0	0
14.3015	-6.33264	1.71726	-3.68764	0.00022634	0.0103624	Chloroflexi	AD3	unclassified	unclassified	unclassified	ASV129	gut_vs_cast				ASV1317	Acidobacteria	Subgroup_6	unclassified	unclassified	unclassified	gut	1.375	1.375
28.0596	-6.51701	1.28025	-5.09044	3.57242e-07	3.17895e-05	Chloroflexi	AD3	unclassified	unclassified	unclassified	ASV46	gut_vs_cast				ASV1317	Acidobacteria	Subgroup_6	unclassified	unclassified	unclassified	cast	2.1	1.1763
16.469	-7.31	1.65331	-4.42142	9.80535e-06	0.000666131	Chloroflexi	AD3	unclassified	unclassified	unclassified	ASV87	gut_vs_cast				ASV1328	Acidobacteria	Acidobacteriia	Solibacterales	Solibacteraceae_(Subgroup_3)	Candidatus_Solibacter	soil	0	0
43.8072	25.1555	2.02631	12.4144	2.1829e-35	6.89576e-32	Bacteroidetes	Bacteroidia	Flavobacteriales	Flavobacteriaceae	Flavobacterium	ASV24	soil_vs_cast				ASV1328	Acidobacteria	Acidobacteriia	Solibacterales	Solibacteraceae_(Subgroup_3)	Candidatus_Solibacter	gut	6.625	4.50768
40.3544	25.1206	1.89381	13.2646	3.71542e-40	2.3474e-36	Tenericutes	Mollicutes	Mycoplasmatales	Lumbricoplasmataceae	Cd. Lumbricincola	ASV29	soil_vs_cast				ASV1328	Acidobacteria	Acidobacteriia	Solibacterales	Solibacteraceae_(Subgroup_3)	Candidatus_Solibacter	cast	0	0
18.8283	24.4761	2.42221	10.1049	5.25702e-24	6.64277e-21	Bacteroidetes	Bacteroidia	Flavobacteriales	Flavobacteriaceae	Flavobacterium	ASV106	soil_vs_cast				ASV1329	Acidobacteria	Subgroup_6	unclassified	unclassified	unclassified	soil	0	0
15.716	24.2288	2.592	9.34752	8.97256e-21	8.09837e-18	Proteobacteria	Gammaproteobacteria	Enterobacteriales	Enterobacteriaceae	unclassified	ASV61	soil_vs_cast				ASV1329	Acidobacteria	Subgroup_6	unclassified	unclassified	unclassified	gut	6.625	4.34633
23.4577	24.1521	2.12228	11.3803	5.24477e-30	1.10455e-26	Bacteroidetes	Bacteroidia	Flavobacteriales	Flavobacteriaceae	Flavobacterium	ASV57	soil_vs_cast				ASV1329	Acidobacteria	Subgroup_6	unclassified	unclassified	unclassified	cast	0	0
7.11899	23.0482	2.57119	8.96402	3.13042e-19	1.9778e-16	Proteobacteria	Gammaproteobacteria	Betaproteobacteriales	Burkholderiaceae	Massilia	ASV297	soil_vs_cast				ASV1338	Acidobacteria	Holophagae	Subgroup_7	unclassified	unclassified	soil	2.78947	1.59601
3.30096	21.9487	3.20518	6.84788	7.49519e-12	1.82133e-09	Proteobacteria	Gammaproteobacteria	Pseudomonadales	Pseudomonadaceae	Pseudomonas	ASV121	soil_vs_cast				ASV1338	Acidobacteria	Holophagae	Subgroup_7	unclassified	unclassified	gut	0	0
143.047	10.6281	0.941132	11.2929	1.42276e-29	2.24725e-26	Bacteroidetes	Bacteroidia	Flavobacteriales	Flavobacteriaceae	Flavobacterium	ASV8	soil_vs_cast				ASV1338	Acidobacteria	Holophagae	Subgroup_7	unclassified	unclassified	cast	0	0
69.4469	9.6186	1.39217	6.90909	4.8776e-12	1.23267e-09	Proteobacteria	Gammaproteobacteria	Enterobacteriales	Enterobacteriaceae	unclassified	ASV18	soil_vs_cast				ASV1348	Acidobacteria	Subgroup_6	unclassified	unclassified	unclassified	soil	0	0
47.7407	9.07796	1.79323	5.06236	4.14107e-07	3.63379e-05	Bacteroidetes	Bacteroidia	Flavobacteriales	Flavobacteriaceae	Flavobacterium	ASV28	soil_vs_cast				ASV1348	Acidobacteria	Subgroup_6	unclassified	unclassified	unclassified	gut	5.25	5.25
29.3031	8.37403	1.89566	4.41747	9.98614e-06	0.000666478	Bacteroidetes	Bacteroidia	Flavobacteriales	Flavobacteriaceae	Flavobacterium	ASV39	soil_vs_cast				ASV1348	Acidobacteria	Subgroup_6	unclassified	unclassified	unclassified	cast	0.5	0.5
16.5195	7.54678	1.13903	6.62562	3.45804e-11	7.53375e-09	Firmicutes	Bacilli	Bacillales	Paenibacillaceae	Paenibacillus	ASV123	soil_vs_cast				ASV137	Acidobacteria	Acidobacteriia	Subgroup_2	unclassified	unclassified	soil	33.8947	2.94481
27.4225	7.51239	1.07795	6.96913	3.18899e-12	8.76002e-10	Proteobacteria	Gammaproteobacteria	Betaproteobacteriales	Chitinibacteraceae	Chitinibacter	ASV63	soil_vs_cast				ASV137	Acidobacteria	Acidobacteriia	Subgroup_2	unclassified	unclassified	gut	0	0
19.7335	7.50431	1.24732	6.01634	1.78409e-09	2.68378e-07	Actinobacteria	Actinobacteria	Micrococcales	Micrococcaceae	Pseudarthrobacter	ASV95	soil_vs_cast				ASV137	Acidobacteria	Acidobacteriia	Subgroup_2	unclassified	unclassified	cast	0	0
153.282	7.11403	1.14271	6.22559	4.79745e-10	9.14768e-08	Bacteroidetes	Bacteroidia	Flavobacteriales	Flavobacteriaceae	Flavobacterium	ASV6	soil_vs_cast				ASV1380	Acidobacteria	Acidobacteriia	Solibacterales	Solibacteraceae_(Subgroup_3)	Candidatus_Solibacter	soil	0.684211	0.684211
78.6089	7.04632	1.13287	6.21988	4.97528e-10	9.14768e-08	Proteobacteria	Gammaproteobacteria	Pseudomonadales	Pseudomonadaceae	Pseudomonas	ASV15	soil_vs_cast				ASV1380	Acidobacteria	Acidobacteriia	Solibacterales	Solibacteraceae_(Subgroup_3)	Candidatus_Solibacter	gut	0	0
23.5871	6.97343	1.07564	6.48307	8.98761e-11	1.83173e-08	Bacteroidetes	Bacteroidia	Flavobacteriales	Flavobacteriaceae	Flavobacterium	ASV89	soil_vs_cast				ASV1380	Acidobacteria	Acidobacteriia	Solibacterales	Solibacteraceae_(Subgroup_3)	Candidatus_Solibacter	cast	1.9	1.06351
10.3936	6.8785	2.08914	3.2925	0.000993014	0.03355	Bacteroidetes	Bacteroidia	Flavobacteriales	Flavobacteriaceae	Flavobacterium	ASV179	soil_vs_cast				ASV1386	Acidobacteria	Acidobacteriia	Subgroup_2	unclassified	unclassified	soil	0	0
10.3296	6.86922	1.73896	3.95019	7.8088e-05	0.00407361	Bacteroidetes	Bacteroidia	Cytophagales	Cytophagaceae	Cytophaga	ASV207	soil_vs_cast				ASV1386	Acidobacteria	Acidobacteriia	Subgroup_2	unclassified	unclassified	gut	6.375	4.25918
9.82087	6.79762	1.98235	3.42908	0.000605636	0.0223766	Firmicutes	Bacilli	Bacillales	unclassified	unclassified	ASV148	soil_vs_cast				ASV1386	Acidobacteria	Acidobacteriia	Subgroup_2	unclassified	unclassified	cast	0	0
8.81049	6.6398	2.09307	3.17228	0.00151248	0.0494889	Proteobacteria	Gammaproteobacteria	Betaproteobacteriales	Burkholderiaceae	Massilia	ASV237	soil_vs_cast				ASV139	Acidobacteria	Acidobacteriia	Acidobacteriales	unclassified	unclassified	soil	25.8947	2.03894
7.89718	6.48407	1.63067	3.97632	6.9989e-05	0.00377941	Bacteroidetes	Bacteroidia	Cytophagales	Spirosomaceae	Dyadobacter	ASV172	soil_vs_cast				ASV139	Acidobacteria	Acidobacteriia	Acidobacteriales	unclassified	unclassified	gut	11.875	7.84319
36.7668	6.35565	1.38675	4.58313	4.58074e-06	0.000344537	Firmicutes	Bacilli	Bacillales	unclassified	unclassified	ASV43	soil_vs_cast				ASV139	Acidobacteria	Acidobacteriia	Acidobacteriales	unclassified	unclassified	cast	1.2	0.829077
6.01071	6.08892	1.70649	3.5681	0.000359583	0.0145631	Proteobacteria	Gammaproteobacteria	Betaproteobacteriales	Burkholderiaceae	unclassified	ASV304	soil_vs_cast				ASV1393	Acidobacteria	Acidobacteriia	Acidobacteriales	unclassified	unclassified	soil	2.68421	1.4611
26.0371	5.70644	1.01483	5.62305	1.87616e-08	2.23652e-06	Proteobacteria	Gammaproteobacteria	Betaproteobacteriales	Burkholderiaceae	Burkholderia-Caballeronia-Paraburkholderia	ASV74	soil_vs_cast				ASV1393	Acidobacteria	Acidobacteriia	Acidobacteriales	unclassified	unclassified	gut	0	0
36.2476	5.69418	1.35542	4.20106	2.65671e-05	0.0015835	Proteobacteria	Gammaproteobacteria	Enterobacteriales	Enterobacteriaceae	unclassified	ASV40	soil_vs_cast				ASV1393	Acidobacteria	Acidobacteriia	Acidobacteriales	unclassified	unclassified	cast	0	0
7.97809	5.6331	1.63015	3.45556	0.000549151	0.0205298	Actinobacteria	Actinobacteria	Streptomycetales	Streptomycetaceae	Kitasatospora	ASV286	soil_vs_cast				ASV1396	Acidobacteria	Acidobacteriia	Acidobacteriales	unclassified	unclassified	soil	2.68421	1.4631
204.423	5.61488	0.930185	6.0363	1.57685e-09	2.42989e-07	Proteobacteria	Gammaproteobacteria	Pseudomonadales	Pseudomonadaceae	Pseudomonas	ASV3	soil_vs_cast				ASV1396	Acidobacteria	Acidobacteriia	Acidobacteriales	unclassified	unclassified	gut	0	0
4.3425	5.56403	1.59438	3.48978	0.000483413	0.0184647	Bacteroidetes	Bacteroidia	Chitinophagales	Chitinophagaceae	unclassified	ASV435	soil_vs_cast				ASV1396	Acidobacteria	Acidobacteriia	Acidobacteriales	unclassified	unclassified	cast	0	0
22.2578	5.5048	1.26384	4.35562	1.3269e-05	0.000852674	Actinobacteria	Actinobacteria	Micrococcales	Microbacteriaceae	unclassified	ASV79	soil_vs_cast				ASV1398	Acidobacteria	Acidobacteriia	Solibacterales	Solibacteraceae_(Subgroup_3)	Candidatus_Solibacter	soil	2.68421	1.49864
313.802	5.50288	0.868629	6.33513	2.37142e-10	4.68207e-08	Proteobacteria	Gammaproteobacteria	Aeromonadales	Aeromonadaceae	Aeromonas	ASV2	soil_vs_cast				ASV1398	Acidobacteria	Acidobacteriia	Solibacterales	Solibacteraceae_(Subgroup_3)	Candidatus_Solibacter	gut	0	0
22.9173	5.49522	1.19879	4.58398	4.56202e-06	0.000344537	Proteobacteria	Gammaproteobacteria	Betaproteobacteriales	Chitinibacteraceae	Silvimonas	ASV77	soil_vs_cast				ASV1398	Acidobacteria	Acidobacteriia	Solibacterales	Solibacteraceae_(Subgroup_3)	Candidatus_Solibacter	cast	0	0
5.4553	5.31303	1.46205	3.63396	0.000279106	0.0121613	Verrucomicrobia	Verrucomicrobiae	unclassified	unclassified	unclassified	ASV385	soil_vs_cast				ASV1435	Acidobacteria	Subgroup_6	unclassified	unclassified	unclassified	soil	0	0
3.58983	5.30992	1.57461	3.37221	0.000745668	0.0265781	Bacteroidetes	Bacteroidia	Chitinophagales	Chitinophagaceae	Filimonas	ASV476	soil_vs_cast				ASV1435	Acidobacteria	Subgroup_6	unclassified	unclassified	unclassified	gut	2.125	2.125
869.643	4.64897	0.64709	7.18442	6.74917e-13	2.24428e-10	Bacteroidetes	Bacteroidia	Flavobacteriales	Flavobacteriaceae	Flavobacterium	ASV1	soil_vs_cast				ASV1435	Acidobacteria	Subgroup_6	unclassified	unclassified	unclassified	cast	1.6	1.11071
38.1738	4.41517	1.1735	3.76239	0.000168298	0.00811682	Proteobacteria	Gammaproteobacteria	Betaproteobacteriales	Rhodocyclaceae	Uliginosibacterium	ASV32	soil_vs_cast				ASV146	Acidobacteria	Acidobacteriia	Acidobacteriales	unclassified	unclassified	soil	32.5263	7.50297
13.6795	4.26586	1.34204	3.17864	0.00147969	0.048946	Bacteroidetes	Bacteroidia	Sphingobacteriales	env.OPS_17	unclassified	ASV117	soil_vs_cast				ASV146	Acidobacteria	Acidobacteriia	Acidobacteriales	unclassified	unclassified	gut	0	0
30.8191	4.26499	1.16291	3.66751	0.000244925	0.0110531	Proteobacteria	Gammaproteobacteria	Betaproteobacteriales	Burkholderiaceae	Burkholderia-Caballeronia-Paraburkholderia	ASV60	soil_vs_cast				ASV146	Acidobacteria	Acidobacteriia	Acidobacteriales	unclassified	unclassified	cast	0	0
60.5239	3.90623	1.03141	3.78729	0.000152302	0.00740185	Proteobacteria	Gammaproteobacteria	Betaproteobacteriales	Burkholderiaceae	Noviherbaspirillum	ASV22	soil_vs_cast				ASV1461	Acidobacteria	Subgroup_6	unclassified	unclassified	unclassified	soil	0	0
18.5103	3.60214	1.06536	3.38114	0.00072186	0.0259131	Proteobacteria	Alphaproteobacteria	Rhizobiales	Rhizobiaceae	unclassified	ASV92	soil_vs_cast				ASV1461	Acidobacteria	Subgroup_6	unclassified	unclassified	unclassified	gut	2.125	2.125
28.1245	3.42495	0.821359	4.16985	3.04795e-05	0.00176669	Verrucomicrobia	Verrucomicrobiae	Verrucomicrobiales	Rubritaleaceae	Luteolibacter	ASV53	soil_vs_cast				ASV1461	Acidobacteria	Subgroup_6	unclassified	unclassified	unclassified	cast	1.55	0.853707
168.921	3.36214	0.470883	7.14008	9.32763e-13	2.80628e-10	Bacteroidetes	Bacteroidia	Flavobacteriales	Flavobacteriaceae	Flavobacterium	ASV5	soil_vs_cast				ASV1471	Acidobacteria	Acidobacteriia	Solibacterales	Solibacteraceae_(Subgroup_3)	Candidatus_Solibacter	soil	0.684211	0.507561
24.5774	2.6929	0.761727	3.53526	0.000407376	0.0162899	Actinobacteria	Actinobacteria	Micrococcales	Cellulomonadaceae	Cellulomonas	ASV68	soil_vs_cast				ASV1471	Acidobacteria	Acidobacteriia	Solibacterales	Solibacteraceae_(Subgroup_3)	Candidatus_Solibacter	gut	3.75	3.3421
34.6964	-4.08814	1.06734	-3.8302	0.00012804	0.00627097	Chloroflexi	AD3	unclassified	unclassified	unclassified	ASV38	soil_vs_cast				ASV1471	Acidobacteria	Acidobacteriia	Solibacterales	Solibacteraceae_(Subgroup_3)	Candidatus_Solibacter	cast	0.25	0.25
13.3876	-4.4884	1.0942	-4.10199	4.09603e-05	0.00231131	Acidobacteria	Acidobacteriia	Acidobacteriales	unclassified	unclassified	ASV139	soil_vs_cast				ASV1475	Acidobacteria	Acidobacteriia	Acidobacteriales	unclassified	unclassified	soil	1.15789	0.536739
8.32629	-4.58862	1.3674	-3.35574	0.00079154	0.0279383	Actinobacteria	Actinobacteria	Micromonosporales	Micromonosporaceae	unclassified	ASV231	soil_vs_cast				ASV1475	Acidobacteria	Acidobacteriia	Acidobacteriales	unclassified	unclassified	gut	3.25	1.76017
6.94054	-4.90255	1.49071	-3.28872	0.00100642	0.0338222	Proteobacteria	Alphaproteobacteria	unclassified	unclassified	unclassified	ASV249	soil_vs_cast				ASV1475	Acidobacteria	Acidobacteriia	Acidobacteriales	unclassified	unclassified	cast	0	0
20.905	-4.92171	1.01767	-4.83624	1.32319e-06	0.000108571	Acidobacteria	Acidobacteriia	Solibacterales	Solibacteraceae_(Subgroup_3)	Bryobacter	ASV90	soil_vs_cast				ASV1481	Acidobacteria	Acidobacteriia	Acidobacteriales	unclassified	unclassified	soil	2.52632	1.73773
22.75	-5.06988	1.10203	-4.60047	4.21536e-06	0.000324789	Chloroflexi	AD3	unclassified	unclassified	unclassified	ASV76	soil_vs_cast				ASV1481	Acidobacteria	Acidobacteriia	Acidobacteriales	unclassified	unclassified	gut	0	0
134.008	-5.1523	1.01985	-5.052	4.3721e-07	3.78397e-05	Verrucomicrobia	Verrucomicrobiae	Chthoniobacterales	Chthoniobacteraceae	Cd. Udaeobacter	ASV9	soil_vs_cast				ASV1481	Acidobacteria	Acidobacteriia	Acidobacteriales	unclassified	unclassified	cast	0	0
3.01018	-5.26835	1.4622	-3.60302	0.000314546	0.013066	Acidobacteria	Acidobacteriia	Subgroup_2	unclassified	unclassified	ASV648	soil_vs_cast				ASV1483	Acidobacteria	Acidobacteriia	Acidobacteriales	unclassified	unclassified	soil	2.52632	1.24339
3.57733	-5.51621	1.27066	-4.34123	1.41688e-05	0.000869113	Proteobacteria	Gammaproteobacteria	Gammaproteobacteria_Incertae_Sedis	Unknown_Family	Acidibacter	ASV572	soil_vs_cast				ASV1483	Acidobacteria	Acidobacteriia	Acidobacteriales	unclassified	unclassified	gut	0	0
3.85879	-5.54146	1.58792	-3.48976	0.000483457	0.0184647	Actinobacteria	Acidimicrobiia	unclassified	unclassified	unclassified	ASV496	soil_vs_cast				ASV1483	Acidobacteria	Acidobacteriia	Acidobacteriales	unclassified	unclassified	cast	0	0
3.66391	-5.55199	1.67857	-3.30757	0.000941103	0.0319671	Acidobacteria	Blastocatellia_(Subgroup_4)	2024-11-01	unclassified	unclassified	ASV536	soil_vs_cast				ASV1484	Acidobacteria	Acidobacteriia	Subgroup_2	unclassified	unclassified	soil	2.52632	1.75114
4.1868	-5.67125	1.57387	-3.60338	0.000314112	0.013066	Acidobacteria	Acidobacteriia	Solibacterales	Solibacteraceae_(Subgroup_3)	Bryobacter	ASV459	soil_vs_cast				ASV1484	Acidobacteria	Acidobacteriia	Subgroup_2	unclassified	unclassified	gut	0	0
31.3781	-5.69027	1.06958	-5.32008	1.03723e-07	1.05697e-05	Acidobacteria	Acidobacteriia	Acidobacteriales	unclassified	unclassified	ASV49	soil_vs_cast				ASV1484	Acidobacteria	Acidobacteriia	Subgroup_2	unclassified	unclassified	cast	0	0
4.62674	-5.7351	1.27542	-4.49664	6.90354e-06	0.000490074	Bacteroidetes	Bacteroidia	Chitinophagales	Chitinophagaceae	unclassified	ASV412	soil_vs_cast				ASV1501	Acidobacteria	Blastocatellia_(Subgroup_4)	Blastocatellales	Blastocatellaceae	unclassified	soil	0	0
38.7822	-5.75892	1.08204	-5.32228	1.02476e-07	1.05697e-05	Acidobacteria	Acidobacteriia	Subgroup_2	unclassified	unclassified	ASV34	soil_vs_cast				ASV1501	Acidobacteria	Blastocatellia_(Subgroup_4)	Blastocatellales	Blastocatellaceae	unclassified	gut	5.875	4.51362
22.4007	-5.78593	1.2112	-4.77702	1.77911e-06	0.000142283	Acidobacteria	Holophagae	Subgroup_7	unclassified	unclassified	ASV91	soil_vs_cast				ASV1501	Acidobacteria	Blastocatellia_(Subgroup_4)	Blastocatellales	Blastocatellaceae	unclassified	cast	0	0
48.4439	-5.78617	1.10612	-5.23105	1.68548e-07	1.66389e-05	Verrucomicrobia	Verrucomicrobiae	Chthoniobacterales	Chthoniobacteraceae	Cd. Udaeobacter	ASV27	soil_vs_cast				ASV1511	Acidobacteria	Acidobacteriia	Solibacterales	Solibacteraceae_(Subgroup_3)	Candidatus_Solibacter	soil	0.736842	0.736842
4.68336	-5.83241	1.32053	-4.41671	1.00214e-05	0.000666478	Bacteroidetes	Bacteroidia	Sphingobacteriales	env.OPS_17	unclassified	ASV432	soil_vs_cast				ASV1511	Acidobacteria	Acidobacteriia	Solibacterales	Solibacteraceae_(Subgroup_3)	Candidatus_Solibacter	gut	4.125	4.125
4.45648	-5.83446	1.66721	-3.49954	0.000466067	0.0180651	Verrucomicrobia	Verrucomicrobiae	Pedosphaerales	Pedosphaeraceae	unclassified	ASV456	soil_vs_cast				ASV1511	Acidobacteria	Acidobacteriia	Solibacterales	Solibacteraceae_(Subgroup_3)	Candidatus_Solibacter	cast	0	0
4.49925	-5.84846	1.6624	-3.51809	0.000434659	0.0172715	Acidobacteria	Acidobacteriia	Acidobacteriales	unclassified	unclassified	ASV446	soil_vs_cast				ASV1518	Acidobacteria	Acidobacteriia	Acidobacteriales	unclassified	unclassified	soil	0	0
20.4421	-5.85956	1.14844	-5.1022	3.35722e-07	3.03014e-05	Actinobacteria	Thermoleophilia	Gaiellales	unclassified	unclassified	ASV85	soil_vs_cast				ASV1518	Acidobacteria	Acidobacteriia	Acidobacteriales	unclassified	unclassified	gut	3.125	3.125
5.60982	-6.00496	1.71464	-3.50217	0.000461493	0.0179982	Proteobacteria	Deltaproteobacteria	RCP2-54	unclassified	unclassified	ASV337	soil_vs_cast				ASV1518	Acidobacteria	Acidobacteriia	Acidobacteriales	unclassified	unclassified	cast	1.05	0.723569
6.32305	-6.0574	1.73886	-3.48355	0.000494802	0.0186081	Chloroflexi	AD3	unclassified	unclassified	unclassified	ASV289	soil_vs_cast				ASV1530	Acidobacteria	Acidobacteriia	Acidobacteriales	unclassified	unclassified	soil	0.473684	0.327746
5.82722	-6.05867	1.62214	-3.73499	0.000187724	0.00885104	Actinobacteria	Acidimicrobiia	Microtrichales	unclassified	unclassified	ASV326	soil_vs_cast				ASV1530	Acidobacteria	Acidobacteriia	Acidobacteriales	unclassified	unclassified	gut	4.625	4.625
12.9236	-6.09658	1.01914	-5.98206	2.20335e-09	3.16381e-07	Acidobacteria	Acidobacteriia	Acidobacteriales	unclassified	unclassified	ASV160	soil_vs_cast				ASV1530	Acidobacteria	Acidobacteriia	Acidobacteriales	unclassified	unclassified	cast	0	0
6.70423	-6.11229	1.7421	-3.50858	0.000450511	0.0176791	Actinobacteria	Thermoleophilia	Gaiellales	unclassified	unclassified	ASV257	soil_vs_cast				ASV1532	Acidobacteria	Subgroup_6	unclassified	unclassified	unclassified	soil	0	0
7.44632	-6.13216	1.2729	-4.81747	1.45388e-06	0.000117764	Rokubacteria	NC10	Rokubacteriales	unclassified	unclassified	ASV217	soil_vs_cast				ASV1532	Acidobacteria	Subgroup_6	unclassified	unclassified	unclassified	gut	5.75	3.83941
5.99713	-6.13223	1.9321	-3.17387	0.00150421	0.0494889	Acidobacteria	Acidobacteriia	Solibacterales	Solibacteraceae_(Subgroup_3)	Cd. Solibacter	ASV325	soil_vs_cast				ASV1532	Acidobacteria	Subgroup_6	unclassified	unclassified	unclassified	cast	0	0
5.91317	-6.14538	1.70342	-3.60768	0.000308947	0.0130129	Acidobacteria	Acidobacteriia	Acidobacteriales	unclassified	unclassified	ASV330	soil_vs_cast				ASV1535	Acidobacteria	Acidobacteriia	Acidobacteriales	unclassified	unclassified	soil	0	0
17.2753	-6.15301	1.01707	-6.04974	1.45077e-09	2.29149e-07	Acidobacteria	Acidobacteriia	Subgroup_2	unclassified	unclassified	ASV102	soil_vs_cast				ASV1535	Acidobacteria	Acidobacteriia	Acidobacteriales	unclassified	unclassified	gut	5.75	3.769
5.8579	-6.18907	1.56249	-3.96104	7.46236e-05	0.00399553	Acidobacteria	Holophagae	Subgroup_7	unclassified	unclassified	ASV369	soil_vs_cast				ASV1535	Acidobacteria	Acidobacteriia	Acidobacteriales	unclassified	unclassified	cast	0	0
5.95079	-6.20512	1.77857	-3.48883	0.000485144	0.0184647	Proteobacteria	Alphaproteobacteria	Elsterales	URHD0088	unclassified	ASV359	soil_vs_cast				ASV154	Acidobacteria	Subgroup_6	unclassified	unclassified	unclassified	soil	11	1.97943
6.29797	-6.33319	1.34832	-4.6971	2.63885e-06	0.00020583	Acidobacteria	Acidobacteriia	Acidobacteriales	unclassified	unclassified	ASV345	soil_vs_cast				ASV154	Acidobacteria	Subgroup_6	unclassified	unclassified	unclassified	gut	18.5	7.13142
6.40527	-6.35762	1.46282	-4.34615	1.3855e-05	0.000869113	Acidobacteria	Acidobacteriia	Acidobacteriales	unclassified	unclassified	ASV336	soil_vs_cast				ASV154	Acidobacteria	Subgroup_6	unclassified	unclassified	unclassified	cast	11.1	2.61665
6.68199	-6.36417	1.16726	-5.45221	4.97483e-08	5.5142e-06	Proteobacteria	Deltaproteobacteria	unclassified	unclassified	unclassified	ASV309	soil_vs_cast				ASV1543	Acidobacteria	Acidobacteriia	Solibacterales	Solibacteraceae_(Subgroup_3)	Bryobacter	soil	0	0
7.15245	-6.37663	1.82958	-3.4853	0.000491586	0.0185978	Acidobacteria	Acidobacteriia	Solibacterales	Solibacteraceae_(Subgroup_3)	Bryobacter	ASV264	soil_vs_cast				ASV1543	Acidobacteria	Acidobacteriia	Solibacterales	Solibacteraceae_(Subgroup_3)	Bryobacter	gut	4.125	4.125
6.67179	-6.37915	1.22581	-5.20403	1.95015e-07	1.81192e-05	Armatimonadetes	Fimbriimonadia	Fimbriimonadales	Fimbriimonadaceae	unclassified	ASV322	soil_vs_cast				ASV1543	Acidobacteria	Acidobacteriia	Solibacterales	Solibacteraceae_(Subgroup_3)	Bryobacter	cast	0.65	0.65
7.74956	-6.41147	1.0435	-6.14422	8.03589e-10	1.33607e-07	Acidobacteria	Acidobacteriia	Acidobacteriales	unclassified	unclassified	ASV229	soil_vs_cast				ASV1580	Acidobacteria	Acidobacteriia	Subgroup_2	unclassified	unclassified	soil	1.26316	1.26316
6.80886	-6.42268	1.64355	-3.90781	9.31372e-05	0.00474549	Gemmatimonadetes	Gemmatimonadetes	Gemmatimonadales	Gemmatimonadaceae	unclassified	ASV303	soil_vs_cast				ASV1580	Acidobacteria	Acidobacteriia	Subgroup_2	unclassified	unclassified	gut	2.625	2.625
12.5466	-6.42987	1.8768	-3.42598	0.000612598	0.0223849	Proteobacteria	Alphaproteobacteria	Rhizobiales	Xanthobacteraceae	unclassified	ASV118	soil_vs_cast				ASV1580	Acidobacteria	Acidobacteriia	Subgroup_2	unclassified	unclassified	cast	0	0
9.35882	-6.43267	1.48687	-4.3263	1.51632e-05	0.000921164	Acidobacteria	Subgroup_6	unclassified	unclassified	unclassified	ASV176	soil_vs_cast				ASV1597	Acidobacteria	Acidobacteriia	Subgroup_2	unclassified	unclassified	soil	0.578947	0.578947
7.58194	-6.4795	1.15058	-5.63151	1.78642e-08	2.1705e-06	Chloroflexi	Gitt-GS-136	unclassified	unclassified	unclassified	ASV267	soil_vs_cast				ASV1597	Acidobacteria	Acidobacteriia	Subgroup_2	unclassified	unclassified	gut	4.125	4.125
7.3443	-6.5042	1.4883	-4.37022	1.24122e-05	0.000808455	Verrucomicrobia	Verrucomicrobiae	Pedosphaerales	Pedosphaeraceae	ADurb.Bin063-1	ASV269	soil_vs_cast				ASV1597	Acidobacteria	Acidobacteriia	Subgroup_2	unclassified	unclassified	cast	0	0
7.36818	-6.50443	1.7979	-3.6178	0.000297121	0.0126072	Proteobacteria	Alphaproteobacteria	Rhizobiales	Xanthobacteraceae	Rhodoplanes	ASV284	soil_vs_cast				ASV160	Acidobacteria	Acidobacteriia	Acidobacteriales	unclassified	unclassified	soil	27.1053	2.12737
7.3404	-6.55411	1.45008	-4.51984	6.18861e-06	0.000449421	Chloroflexi	Anaerolineae	Anaerolineales	Anaerolineaceae	unclassified	ASV292	soil_vs_cast				ASV160	Acidobacteria	Acidobacteriia	Acidobacteriales	unclassified	unclassified	gut	4.25	2.80783
7.41993	-6.56974	1.44735	-4.53917	5.64766e-06	0.000419787	Acidobacteria	Subgroup_6	unclassified	unclassified	unclassified	ASV287	soil_vs_cast				ASV160	Acidobacteria	Acidobacteriia	Acidobacteriales	unclassified	unclassified	cast	1.05	1.05
7.91216	-6.58985	1.51348	-4.35411	1.3361e-05	0.000852674	Gemmatimonadetes	Gemmatimonadetes	Gemmatimonadales	Gemmatimonadaceae	Gemmatimonas	ASV248	soil_vs_cast				ASV161	Acidobacteria	Acidobacteriia	Acidobacteriales	unclassified	unclassified	soil	20.1579	2.21143
28.0596	-6.62901	1.02069	-6.49467	8.32169e-11	1.75255e-08	Chloroflexi	AD3	unclassified	unclassified	unclassified	ASV46	soil_vs_cast				ASV161	Acidobacteria	Acidobacteriia	Acidobacteriales	unclassified	unclassified	gut	20.5	15.4029
7.98448	-6.65511	2.00136	-3.3253	0.000883226	0.030493	Verrucomicrobia	Verrucomicrobiae	Pedosphaerales	Pedosphaeraceae	ADurb.Bin063-1	ASV277	soil_vs_cast				ASV161	Acidobacteria	Acidobacteriia	Acidobacteriales	unclassified	unclassified	cast	0	0
8.38913	-6.69913	1.79922	-3.72335	0.000196599	0.00920085	Proteobacteria	Gammaproteobacteria	Betaproteobacteriales	Burkholderiaceae	unclassified	ASV243	soil_vs_cast				ASV163	Acidobacteria	Acidobacteriia	Acidobacteriales	unclassified	unclassified	soil	21.4737	3.23122
9.15909	-6.79141	1.71846	-3.95203	7.74914e-05	0.00407361	Proteobacteria	Alphaproteobacteria	Rhizobiales	KF-JG30-B3	unclassified	ASV216	soil_vs_cast				ASV163	Acidobacteria	Acidobacteriia	Acidobacteriales	unclassified	unclassified	gut	19.625	12.9476
11.0362	-6.84151	1.57572	-4.34185	1.4129e-05	0.000869113	Verrucomicrobia	Verrucomicrobiae	Chthoniobacterales	Chthoniobacteraceae	Cd. Udaeobacter	ASV149	soil_vs_cast				ASV163	Acidobacteria	Acidobacteriia	Acidobacteriales	unclassified	unclassified	cast	0	0
9.15929	-6.87366	1.5532	-4.42547	9.62311e-06	0.000660857	Verrucomicrobia	Verrucomicrobiae	Pedosphaerales	Pedosphaeraceae	ADurb.Bin063-1	ASV222	soil_vs_cast				ASV1657	Acidobacteria	Subgroup_5	unclassified	unclassified	unclassified	soil	2.26316	1.55568
10.8324	-6.8749	1.18973	-5.77851	7.5365e-09	9.91992e-07	Acidobacteria	Acidobacteriia	Acidobacteriales	unclassified	unclassified	ASV161	soil_vs_cast				ASV1657	Acidobacteria	Subgroup_5	unclassified	unclassified	unclassified	gut	0	0
10.8854	-6.89649	1.57447	-4.38019	1.18576e-05	0.000780381	Proteobacteria	Gammaproteobacteria	Gammaproteobacteria_Incertae_Sedis	Unknown_Family	Acidibacter	ASV170	soil_vs_cast				ASV1657	Acidobacteria	Subgroup_5	unclassified	unclassified	unclassified	cast	0	0
10.6264	-6.90579	1.17385	-5.88303	4.02833e-09	5.53283e-07	Acidobacteria	Acidobacteriia	Acidobacteriales	unclassified	unclassified	ASV171	soil_vs_cast				ASV1663	Acidobacteria	Acidobacteriia	Acidobacteriales	Acidobacteriaceae_(Subgroup_1)	unclassified	soil	2.26316	1.08105
11.0865	-6.91707	1.32768	-5.20991	1.88937e-07	1.81192e-05	Acidobacteria	Acidobacteriia	Acidobacteriales	unclassified	unclassified	ASV163	soil_vs_cast				ASV1663	Acidobacteria	Acidobacteriia	Acidobacteriales	Acidobacteriaceae_(Subgroup_1)	unclassified	gut	0	0
10.6458	-6.92078	1.39991	-4.94375	7.6635e-07	6.37079e-05	Acidobacteria	Subgroup_6	unclassified	unclassified	unclassified	ASV180	soil_vs_cast				ASV1663	Acidobacteria	Acidobacteriia	Acidobacteriales	Acidobacteriaceae_(Subgroup_1)	unclassified	cast	0	0
10.2576	-6.9211	1.30015	-5.32332	1.01889e-07	1.05697e-05	Proteobacteria	Alphaproteobacteria	Elsterales	unclassified	unclassified	ASV198	soil_vs_cast				ASV1665	Acidobacteria	Blastocatellia_(Subgroup_4)	Blastocatellales	Blastocatellaceae	unclassified	soil	2.26316	1.61108
10.5174	-6.9237	1.65236	-4.19018	2.78737e-05	0.00164585	Proteobacteria	Alphaproteobacteria	Rhizobiales	Xanthobacteraceae	unclassified	ASV193	soil_vs_cast				ASV1665	Acidobacteria	Blastocatellia_(Subgroup_4)	Blastocatellales	Blastocatellaceae	unclassified	gut	0	0
12.6843	-7.13998	1.19242	-5.98781	2.1269e-09	3.12506e-07	Gemmatimonadetes	Gemmatimonadetes	Gemmatimonadales	Gemmatimonadaceae	unclassified	ASV144	soil_vs_cast				ASV1665	Acidobacteria	Blastocatellia_(Subgroup_4)	Blastocatellales	Blastocatellaceae	unclassified	cast	0	0
16.469	-7.17097	1.30005	-5.51594	3.46919e-08	3.91399e-06	Chloroflexi	AD3	unclassified	unclassified	unclassified	ASV87	soil_vs_cast				ASV167	Acidobacteria	Acidobacteriia	Subgroup_2	unclassified	unclassified	soil	26.5263	2.89522
11.8207	-7.18284	1.35336	-5.30742	1.11186e-07	1.11504e-05	Acidobacteria	Acidobacteriia	Acidobacteriales	unclassified	unclassified	ASV175	soil_vs_cast				ASV167	Acidobacteria	Acidobacteriia	Subgroup_2	unclassified	unclassified	gut	5	5
12.8423	-7.20883	1.75743	-4.10192	4.09728e-05	0.00231131	Verrucomicrobia	Verrucomicrobiae	Chthoniobacterales	Chthoniobacteraceae	Cd. Udaeobacter	ASV145	soil_vs_cast				ASV167	Acidobacteria	Acidobacteriia	Subgroup_2	unclassified	unclassified	cast	0	0
14.3015	-7.2207	1.34647	-5.36268	8.19975e-08	8.78068e-06	Chloroflexi	AD3	unclassified	unclassified	unclassified	ASV129	soil_vs_cast				ASV1677	Acidobacteria	Subgroup_17	unclassified	unclassified	unclassified	soil	0	0
12.2493	-7.23102	1.45397	-4.97329	6.58248e-07	5.62002e-05	Chloroflexi	TK10	unclassified	unclassified	unclassified	ASV181	soil_vs_cast				ASV1677	Acidobacteria	Subgroup_17	unclassified	unclassified	unclassified	gut	5.25	3.48338
12.6796	-7.29688	1.19162	-6.12352	9.15293e-10	1.48277e-07	Acidobacteria	Acidobacteriia	Subgroup_2	unclassified	unclassified	ASV167	soil_vs_cast				ASV1677	Acidobacteria	Subgroup_17	unclassified	unclassified	unclassified	cast	0	0
12.9737	-7.34905	1.41098	-5.20847	1.90405e-07	1.81192e-05	Planctomycetes	Phycisphaerae	Tepidisphaerales	WD2101_soil_group	unclassified	ASV166	soil_vs_cast				ASV1688	Acidobacteria	Acidobacteriia	Subgroup_2	unclassified	unclassified	soil	0	0
15.6661	-7.49703	0.983515	-7.62269	2.48441e-14	9.23323e-12	Actinobacteria	Thermoleophilia	Gaiellales	unclassified	unclassified	ASV128	soil_vs_cast				ASV1688	Acidobacteria	Acidobacteriia	Subgroup_2	unclassified	unclassified	gut	5.25	3.68273
14.2859	-7.5148	1.68256	-4.46629	7.95878e-06	0.000558706	Acidobacteria	Acidobacteriia	Acidobacteriales	unclassified	unclassified	ASV146	soil_vs_cast				ASV1688	Acidobacteria	Acidobacteriia	Subgroup_2	unclassified	unclassified	cast	0	0
14.9069	-7.55507	0.988016	-7.64671	2.06192e-14	8.142e-12	Proteobacteria	Deltaproteobacteria	Myxococcales	Archangiaceae	Anaeromyxobacter	ASV135	soil_vs_cast				ASV1698	Acidobacteria	Acidobacteriia	Acidobacteriales	unclassified	unclassified	soil	2.21053	1.21053
16.0568	-7.55567	1.32657	-5.69565	1.22901e-08	1.58466e-06	Verrucomicrobia	Verrucomicrobiae	Chthoniobacterales	Chthoniobacteraceae	Cd. Udaeobacter	ASV124	soil_vs_cast				ASV1698	Acidobacteria	Acidobacteriia	Acidobacteriales	unclassified	unclassified	gut	0	0
15.3372	-7.61714	0.966382	-7.88212	3.21868e-15	1.45254e-12	Acidobacteria	Acidobacteriia	Subgroup_2	unclassified	unclassified	ASV137	soil_vs_cast				ASV1698	Acidobacteria	Acidobacteriia	Acidobacteriales	unclassified	unclassified	cast	0	0
17.15	-7.77846	1.572	-4.94813	7.4929e-07	6.31202e-05	Acidobacteria	Acidobacteriia	Solibacterales	Solibacteraceae_(Subgroup_3)	Cd. Solibacter	ASV122	soil_vs_cast				ASV17	Acidobacteria	Subgroup_6	unclassified	unclassified	unclassified	soil	117.421	17.2388
20.4662	-7.96806	1.07961	-7.3805	1.57698e-13	5.53522e-11	Chloroflexi	AD3	unclassified	unclassified	unclassified	ASV75	soil_vs_cast				ASV17	Acidobacteria	Subgroup_6	unclassified	unclassified	unclassified	gut	77.25	35.0167
23.0723	-8.20647	0.894189	-9.17756	4.40977e-20	3.48262e-17	Acidobacteria	Holophagae	Subgroup_7	unclassified	unclassified	ASV88	soil_vs_cast				ASV17	Acidobacteria	Subgroup_6	unclassified	unclassified	unclassified	cast	9.8	5.96684
																ASV171	Acidobacteria	Acidobacteriia	Acidobacteriales	unclassified	unclassified	soil	21.0526	2.39697
																ASV171	Acidobacteria	Acidobacteriia	Acidobacteriales	unclassified	unclassified	gut	15.25	10.1608
																ASV171	Acidobacteria	Acidobacteriia	Acidobacteriales	unclassified	unclassified	cast	0	0
																ASV1717	Acidobacteria	unclassified	unclassified	unclassified	unclassified	soil	1.05263	0.739344
																ASV1717	Acidobacteria	unclassified	unclassified	unclassified	unclassified	gut	2.625	2.625
																ASV1717	Acidobacteria	unclassified	unclassified	unclassified	unclassified	cast	0	0
																ASV175	Acidobacteria	Acidobacteriia	Acidobacteriales	unclassified	unclassified	soil	25.4211	3.95613
																ASV175	Acidobacteria	Acidobacteriia	Acidobacteriales	unclassified	unclassified	gut	5.625	3.69332
																ASV175	Acidobacteria	Acidobacteriia	Acidobacteriales	unclassified	unclassified	cast	0	0
																ASV176	Acidobacteria	Subgroup_6	unclassified	unclassified	unclassified	soil	15.0526	3.51478
																ASV176	Acidobacteria	Subgroup_6	unclassified	unclassified	unclassified	gut	29.875	13.6309
																ASV176	Acidobacteria	Subgroup_6	unclassified	unclassified	unclassified	cast	0	0
																ASV1774	Acidobacteria	Acidobacteriia	Acidobacteriales	unclassified	unclassified	soil	2.10526	1.46478
																ASV1774	Acidobacteria	Acidobacteriia	Acidobacteriales	unclassified	unclassified	gut	0	0
																ASV1774	Acidobacteria	Acidobacteriia	Acidobacteriales	unclassified	unclassified	cast	0	0
																ASV1789	Acidobacteria	Acidobacteriia	Solibacterales	Solibacteraceae_(Subgroup_3)	Bryobacter	soil	0	0
																ASV1789	Acidobacteria	Acidobacteriia	Solibacterales	Solibacteraceae_(Subgroup_3)	Bryobacter	gut	1.875	1.875
																ASV1789	Acidobacteria	Acidobacteriia	Solibacterales	Solibacteraceae_(Subgroup_3)	Bryobacter	cast	1.2	0.825897
																ASV180	Acidobacteria	Subgroup_6	unclassified	unclassified	unclassified	soil	21	2.95878
																ASV180	Acidobacteria	Subgroup_6	unclassified	unclassified	unclassified	gut	15	15
																ASV180	Acidobacteria	Subgroup_6	unclassified	unclassified	unclassified	cast	0	0
																ASV1822	Acidobacteria	Subgroup_6	unclassified	unclassified	unclassified	soil	2.05263	0.628158
																ASV1822	Acidobacteria	Subgroup_6	unclassified	unclassified	unclassified	gut	0	0
																ASV1822	Acidobacteria	Subgroup_6	unclassified	unclassified	unclassified	cast	0	0
																ASV1848	Acidobacteria	Subgroup_6	unclassified	unclassified	unclassified	soil	1.05263	1.05263
																ASV1848	Acidobacteria	Subgroup_6	unclassified	unclassified	unclassified	gut	2.25	2.25
																ASV1848	Acidobacteria	Subgroup_6	unclassified	unclassified	unclassified	cast	0	0
																ASV1865	Acidobacteria	Acidobacteriia	Solibacterales	Solibacteraceae_(Subgroup_3)	Bryobacter	soil	2	1.38285
																ASV1865	Acidobacteria	Acidobacteriia	Solibacterales	Solibacteraceae_(Subgroup_3)	Bryobacter	gut	0	0
																ASV1865	Acidobacteria	Acidobacteriia	Solibacterales	Solibacteraceae_(Subgroup_3)	Bryobacter	cast	0	0
																ASV1867	Acidobacteria	Acidobacteriia	Acidobacteriales	unclassified	unclassified	soil	2	1.13168
																ASV1867	Acidobacteria	Acidobacteriia	Acidobacteriales	unclassified	unclassified	gut	0	0
																ASV1867	Acidobacteria	Acidobacteriia	Acidobacteriales	unclassified	unclassified	cast	0	0
																ASV189	Acidobacteria	Acidobacteriia	Solibacterales	Solibacteraceae_(Subgroup_3)	Candidatus_Solibacter	soil	23.4211	4.52822
																ASV189	Acidobacteria	Acidobacteriia	Solibacterales	Solibacteraceae_(Subgroup_3)	Candidatus_Solibacter	gut	4	4
																ASV189	Acidobacteria	Acidobacteriia	Solibacterales	Solibacteraceae_(Subgroup_3)	Candidatus_Solibacter	cast	1.15	1.15
																ASV1926	Acidobacteria	Acidobacteriia	Acidobacteriales	Acidobacteriaceae_(Subgroup_1)	unclassified	soil	1.26316	0.871384
																ASV1926	Acidobacteria	Acidobacteriia	Acidobacteriales	Acidobacteriaceae_(Subgroup_1)	unclassified	gut	0	0
																ASV1926	Acidobacteria	Acidobacteriia	Acidobacteriales	Acidobacteriaceae_(Subgroup_1)	unclassified	cast	0.6	0.6
																ASV1946	Acidobacteria	Acidobacteriia	Acidobacteriales	unclassified	unclassified	soil	0	0
																ASV1946	Acidobacteria	Acidobacteriia	Acidobacteriales	unclassified	unclassified	gut	1.75	1.75
																ASV1946	Acidobacteria	Acidobacteriia	Acidobacteriales	unclassified	unclassified	cast	1.1	1.1
																ASV1975	Acidobacteria	Acidobacteriia	Acidobacteriales	Acidobacteriaceae_(Subgroup_1)	Acidipila	soil	1.89474	0.80166
																ASV1975	Acidobacteria	Acidobacteriia	Acidobacteriales	Acidobacteriaceae_(Subgroup_1)	Acidipila	gut	0	0
																ASV1975	Acidobacteria	Acidobacteriia	Acidobacteriales	Acidobacteriaceae_(Subgroup_1)	Acidipila	cast	0	0
																ASV1983	Acidobacteria	Subgroup_6	unclassified	unclassified	unclassified	soil	0	0
																ASV1983	Acidobacteria	Subgroup_6	unclassified	unclassified	unclassified	gut	0	0
																ASV1983	Acidobacteria	Subgroup_6	unclassified	unclassified	unclassified	cast	1.75	1.20498
																ASV200	Acidobacteria	Blastocatellia_(Subgroup_4)	Pyrinomonadales	Pyrinomonadaceae	RB41	soil	6.52632	4.19438
																ASV200	Acidobacteria	Blastocatellia_(Subgroup_4)	Pyrinomonadales	Pyrinomonadaceae	RB41	gut	6.75	6.19836
																ASV200	Acidobacteria	Blastocatellia_(Subgroup_4)	Pyrinomonadales	Pyrinomonadaceae	RB41	cast	14.25	4.25928
																ASV202	Acidobacteria	Acidobacteriia	Acidobacteriales	unclassified	unclassified	soil	17.3684	4.76722
																ASV202	Acidobacteria	Acidobacteriia	Acidobacteriales	unclassified	unclassified	gut	11	7.49524
																ASV202	Acidobacteria	Acidobacteriia	Acidobacteriales	unclassified	unclassified	cast	1.7	1.7
																ASV2024	Acidobacteria	Acidobacteriia	Subgroup_2	unclassified	unclassified	soil	0.578947	0.578947
																ASV2024	Acidobacteria	Acidobacteriia	Subgroup_2	unclassified	unclassified	gut	3	3
																ASV2024	Acidobacteria	Acidobacteriia	Subgroup_2	unclassified	unclassified	cast	0	0
																ASV2027	Acidobacteria	Acidobacteriia	Acidobacteriales	unclassified	unclassified	soil	1.84211	1.31181
																ASV2027	Acidobacteria	Acidobacteriia	Acidobacteriales	unclassified	unclassified	gut	0	0
																ASV2027	Acidobacteria	Acidobacteriia	Acidobacteriales	unclassified	unclassified	cast	0	0
																ASV2068	Acidobacteria	Acidobacteriia	Subgroup_2	unclassified	unclassified	soil	1.10526	1.10526
																ASV2068	Acidobacteria	Acidobacteriia	Subgroup_2	unclassified	unclassified	gut	1.625	1.625
																ASV2068	Acidobacteria	Acidobacteriia	Subgroup_2	unclassified	unclassified	cast	0	0
																ASV2075	Acidobacteria	Acidobacteriia	Solibacterales	Solibacteraceae_(Subgroup_3)	Bryobacter	soil	1.78947	1.23917
																ASV2075	Acidobacteria	Acidobacteriia	Solibacterales	Solibacteraceae_(Subgroup_3)	Bryobacter	gut	0	0
																ASV2075	Acidobacteria	Acidobacteriia	Solibacterales	Solibacteraceae_(Subgroup_3)	Bryobacter	cast	0	0
																ASV2078	Acidobacteria	Acidobacteriia	Acidobacteriales	Acidobacteriaceae_(Subgroup_1)	Granulicella	soil	0.578947	0.578947
																ASV2078	Acidobacteria	Acidobacteriia	Acidobacteriales	Acidobacteriaceae_(Subgroup_1)	Granulicella	gut	0	0
																ASV2078	Acidobacteria	Acidobacteriia	Acidobacteriales	Acidobacteriaceae_(Subgroup_1)	Granulicella	cast	1.1	0.76054
																ASV213	Acidobacteria	Holophagae	Subgroup_7	unclassified	unclassified	soil	6.57895	2.64721
																ASV213	Acidobacteria	Holophagae	Subgroup_7	unclassified	unclassified	gut	15.125	9.9129
																ASV213	Acidobacteria	Holophagae	Subgroup_7	unclassified	unclassified	cast	9.05	3.31859
																ASV2148	Acidobacteria	Subgroup_17	unclassified	unclassified	unclassified	soil	0.947368	0.947368
																ASV2148	Acidobacteria	Subgroup_17	unclassified	unclassified	unclassified	gut	0.75	0.75
																ASV2148	Acidobacteria	Subgroup_17	unclassified	unclassified	unclassified	cast	0.4	0.4
																ASV2197	Acidobacteria	Acidobacteriia	Acidobacteriales	unclassified	unclassified	soil	1.68421	1.15989
																ASV2197	Acidobacteria	Acidobacteriia	Acidobacteriales	unclassified	unclassified	gut	0	0
																ASV2197	Acidobacteria	Acidobacteriia	Acidobacteriales	unclassified	unclassified	cast	0	0
																ASV2265	Acidobacteria	Subgroup_17	unclassified	unclassified	unclassified	soil	1.36842	0.988858
																ASV2265	Acidobacteria	Subgroup_17	unclassified	unclassified	unclassified	gut	0	0
																ASV2265	Acidobacteria	Subgroup_17	unclassified	unclassified	unclassified	cast	0	0
																ASV227	Acidobacteria	Acidobacteriia	Solibacterales	Solibacteraceae_(Subgroup_3)	Candidatus_Solibacter	soil	14.9474	4.21462
																ASV227	Acidobacteria	Acidobacteriia	Solibacterales	Solibacteraceae_(Subgroup_3)	Candidatus_Solibacter	gut	6.375	6.375
																ASV227	Acidobacteria	Acidobacteriia	Solibacterales	Solibacteraceae_(Subgroup_3)	Candidatus_Solibacter	cast	2.7	2.7
																ASV228	Acidobacteria	Acidobacteriia	Acidobacteriales	Acidobacteriaceae_(Subgroup_1)	Occallatibacter	soil	10	2.19249
																ASV228	Acidobacteria	Acidobacteriia	Acidobacteriales	Acidobacteriaceae_(Subgroup_1)	Occallatibacter	gut	6.625	6.625
																ASV228	Acidobacteria	Acidobacteriia	Acidobacteriales	Acidobacteriaceae_(Subgroup_1)	Occallatibacter	cast	7.1	2.19077
																ASV229	Acidobacteria	Acidobacteriia	Acidobacteriales	unclassified	unclassified	soil	14.6316	1.03226
																ASV229	Acidobacteria	Acidobacteriia	Acidobacteriales	unclassified	unclassified	gut	13.125	8.61775
																ASV229	Acidobacteria	Acidobacteriia	Acidobacteriales	unclassified	unclassified	cast	0	0
																ASV2292	Acidobacteria	Acidobacteriia	Acidobacteriales	unclassified	unclassified	soil	0.631579	0.631579
																ASV2292	Acidobacteria	Acidobacteriia	Acidobacteriales	unclassified	unclassified	gut	2.25	2.25
																ASV2292	Acidobacteria	Acidobacteriia	Acidobacteriales	unclassified	unclassified	cast	0	0
																ASV230	Acidobacteria	Subgroup_6	unclassified	unclassified	unclassified	soil	12.1053	4.83342
																ASV230	Acidobacteria	Subgroup_6	unclassified	unclassified	unclassified	gut	8	8
																ASV230	Acidobacteria	Subgroup_6	unclassified	unclassified	unclassified	cast	4.35	3.01162
																ASV235	Acidobacteria	Subgroup_6	unclassified	unclassified	unclassified	soil	2.31579	1.6562
																ASV235	Acidobacteria	Subgroup_6	unclassified	unclassified	unclassified	gut	14	7.83536
																ASV235	Acidobacteria	Subgroup_6	unclassified	unclassified	unclassified	cast	10.85	3.46583
																ASV236	Acidobacteria	Acidobacteriia	Solibacterales	Solibacteraceae_(Subgroup_3)	Bryobacter	soil	14.6316	3.69068
																ASV236	Acidobacteria	Acidobacteriia	Solibacterales	Solibacteraceae_(Subgroup_3)	Bryobacter	gut	5.25	3.56446
																ASV236	Acidobacteria	Acidobacteriia	Solibacterales	Solibacteraceae_(Subgroup_3)	Bryobacter	cast	1.6	1.11071
																ASV238	Acidobacteria	Subgroup_6	unclassified	unclassified	unclassified	soil	5.68421	3.31667
																ASV238	Acidobacteria	Subgroup_6	unclassified	unclassified	unclassified	gut	32.75	16.2159
																ASV238	Acidobacteria	Subgroup_6	unclassified	unclassified	unclassified	cast	0	0
																ASV2394	Acidobacteria	Blastocatellia_(Subgroup_4)	2024-11-01	unclassified	unclassified	soil	1.52632	1.04956
																ASV2394	Acidobacteria	Blastocatellia_(Subgroup_4)	2024-11-01	unclassified	unclassified	gut	0	0
																ASV2394	Acidobacteria	Blastocatellia_(Subgroup_4)	2024-11-01	unclassified	unclassified	cast	0	0
																ASV242	Acidobacteria	Subgroup_6	unclassified	unclassified	unclassified	soil	19.0526	8.91758
																ASV242	Acidobacteria	Subgroup_6	unclassified	unclassified	unclassified	gut	0	0
																ASV242	Acidobacteria	Subgroup_6	unclassified	unclassified	unclassified	cast	0	0
																ASV2442	Acidobacteria	Acidobacteriia	Acidobacteriales	Koribacteraceae	Candidatus_Koribacter	soil	0	0
																ASV2442	Acidobacteria	Acidobacteriia	Acidobacteriales	Koribacteraceae	Candidatus_Koribacter	gut	3.5	2.41276
																ASV2442	Acidobacteria	Acidobacteriia	Acidobacteriales	Koribacteraceae	Candidatus_Koribacter	cast	0	0
																ASV251	Acidobacteria	Subgroup_6	unclassified	unclassified	unclassified	soil	3.31579	2.29422
																ASV251	Acidobacteria	Subgroup_6	unclassified	unclassified	unclassified	gut	36.125	17.849
																ASV251	Acidobacteria	Subgroup_6	unclassified	unclassified	unclassified	cast	0	0
																ASV2616	Acidobacteria	Blastocatellia_(Subgroup_4)	Pyrinomonadales	Pyrinomonadaceae	RB41	soil	1.36842	0.967938
																ASV2616	Acidobacteria	Blastocatellia_(Subgroup_4)	Pyrinomonadales	Pyrinomonadaceae	RB41	gut	0	0
																ASV2616	Acidobacteria	Blastocatellia_(Subgroup_4)	Pyrinomonadales	Pyrinomonadaceae	RB41	cast	0	0
																ASV2625	Acidobacteria	Acidobacteriia	Acidobacteriales	Acidobacteriaceae_(Subgroup_1)	unclassified	soil	0.894737	0.894737
																ASV2625	Acidobacteria	Acidobacteriia	Acidobacteriales	Acidobacteriaceae_(Subgroup_1)	unclassified	gut	0	0
																ASV2625	Acidobacteria	Acidobacteriia	Acidobacteriales	Acidobacteriaceae_(Subgroup_1)	unclassified	cast	0.4	0.4
																ASV264	Acidobacteria	Acidobacteriia	Solibacterales	Solibacteraceae_(Subgroup_3)	Bryobacter	soil	14.5789	3.99804
																ASV264	Acidobacteria	Acidobacteriia	Solibacterales	Solibacteraceae_(Subgroup_3)	Bryobacter	gut	8	5.32179
																ASV264	Acidobacteria	Acidobacteriia	Solibacterales	Solibacteraceae_(Subgroup_3)	Bryobacter	cast	0	0
																ASV265	Acidobacteria	Subgroup_6	unclassified	unclassified	unclassified	soil	13.7895	4.54386
																ASV265	Acidobacteria	Subgroup_6	unclassified	unclassified	unclassified	gut	9.875	6.70937
																ASV265	Acidobacteria	Subgroup_6	unclassified	unclassified	unclassified	cast	0	0
																ASV268	Acidobacteria	Acidobacteriia	Solibacterales	Solibacteraceae_(Subgroup_3)	Candidatus_Solibacter	soil	7.36842	5.12088
																ASV268	Acidobacteria	Acidobacteriia	Solibacterales	Solibacteraceae_(Subgroup_3)	Candidatus_Solibacter	gut	16.75	11.0061
																ASV268	Acidobacteria	Acidobacteriia	Solibacterales	Solibacteraceae_(Subgroup_3)	Candidatus_Solibacter	cast	3.25	2.30203
																ASV270	Acidobacteria	Subgroup_6	unclassified	unclassified	unclassified	soil	7.47368	2.12389
																ASV270	Acidobacteria	Subgroup_6	unclassified	unclassified	unclassified	gut	13.375	6.23623
																ASV270	Acidobacteria	Subgroup_6	unclassified	unclassified	unclassified	cast	4.45	1.59023
																ASV271	Acidobacteria	Acidobacteriia	Solibacterales	Solibacteraceae_(Subgroup_3)	Candidatus_Solibacter	soil	7.31579	4.07822
																ASV271	Acidobacteria	Acidobacteriia	Solibacterales	Solibacteraceae_(Subgroup_3)	Candidatus_Solibacter	gut	17.625	8.70742
																ASV271	Acidobacteria	Acidobacteriia	Solibacterales	Solibacteraceae_(Subgroup_3)	Candidatus_Solibacter	cast	2.85	2.85
																ASV2788	Acidobacteria	Acidobacteriia	Acidobacteriales	unclassified	unclassified	soil	1.26316	0.561129
																ASV2788	Acidobacteria	Acidobacteriia	Acidobacteriales	unclassified	unclassified	gut	0	0
																ASV2788	Acidobacteria	Acidobacteriia	Acidobacteriales	unclassified	unclassified	cast	0	0
																ASV2807	Acidobacteria	Acidobacteriia	Acidobacteriales	Koribacteraceae	Candidatus_Koribacter	soil	0	0
																ASV2807	Acidobacteria	Acidobacteriia	Acidobacteriales	Koribacteraceae	Candidatus_Koribacter	gut	0	0
																ASV2807	Acidobacteria	Acidobacteriia	Acidobacteriales	Koribacteraceae	Candidatus_Koribacter	cast	1.15	0.792315
																ASV287	Acidobacteria	Subgroup_6	unclassified	unclassified	unclassified	soil	16.6316	2.97082
																ASV287	Acidobacteria	Subgroup_6	unclassified	unclassified	unclassified	gut	0	0
																ASV287	Acidobacteria	Subgroup_6	unclassified	unclassified	unclassified	cast	0	0
																ASV293	Acidobacteria	Acidobacteriia	Solibacterales	Solibacteraceae_(Subgroup_3)	Candidatus_Solibacter	soil	10.1579	3.40215
																ASV293	Acidobacteria	Acidobacteriia	Solibacterales	Solibacteraceae_(Subgroup_3)	Candidatus_Solibacter	gut	11.25	7.89156
																ASV293	Acidobacteria	Acidobacteriia	Solibacterales	Solibacteraceae_(Subgroup_3)	Candidatus_Solibacter	cast	1.25	1.25
																ASV295	Acidobacteria	Acidobacteriia	Acidobacteriales	unclassified	unclassified	soil	14.4211	3.2112
																ASV295	Acidobacteria	Acidobacteriia	Acidobacteriales	unclassified	unclassified	gut	0	0
																ASV295	Acidobacteria	Acidobacteriia	Acidobacteriales	unclassified	unclassified	cast	1.4	1.4
																ASV2959	Acidobacteria	Acidobacteriia	Acidobacteriales	Acidobacteriaceae_(Subgroup_1)	Granulicella	soil	0.842105	0.842105
																ASV2959	Acidobacteria	Acidobacteriia	Acidobacteriales	Acidobacteriaceae_(Subgroup_1)	Granulicella	gut	0.75	0.75
																ASV2959	Acidobacteria	Acidobacteriia	Acidobacteriales	Acidobacteriaceae_(Subgroup_1)	Granulicella	cast	0	0
																ASV296	Acidobacteria	Subgroup_6	unclassified	unclassified	unclassified	soil	9.15789	2.01495
																ASV296	Acidobacteria	Subgroup_6	unclassified	unclassified	unclassified	gut	13.875	9.66665
																ASV296	Acidobacteria	Subgroup_6	unclassified	unclassified	unclassified	cast	0.85	0.85
																ASV2961	Acidobacteria	AT-s3-28	unclassified	unclassified	unclassified	soil	0	0
																ASV2961	Acidobacteria	AT-s3-28	unclassified	unclassified	unclassified	gut	2.75	2.12762
																ASV2961	Acidobacteria	AT-s3-28	unclassified	unclassified	unclassified	cast	0	0
																ASV299	Acidobacteria	Blastocatellia_(Subgroup_4)	Pyrinomonadales	Pyrinomonadaceae	RB41	soil	14.2105	4.56569
																ASV299	Acidobacteria	Blastocatellia_(Subgroup_4)	Pyrinomonadales	Pyrinomonadaceae	RB41	gut	3.625	3.625
																ASV299	Acidobacteria	Blastocatellia_(Subgroup_4)	Pyrinomonadales	Pyrinomonadaceae	RB41	cast	0	0
																ASV30	Acidobacteria	Subgroup_6	unclassified	unclassified	unclassified	soil	74.4737	5.9914
																ASV30	Acidobacteria	Subgroup_6	unclassified	unclassified	unclassified	gut	58.375	32.5175
																ASV30	Acidobacteria	Subgroup_6	unclassified	unclassified	unclassified	cast	7.3	3.49443
																ASV3027	Acidobacteria	Subgroup_6	unclassified	unclassified	unclassified	soil	0	0
																ASV3027	Acidobacteria	Subgroup_6	unclassified	unclassified	unclassified	gut	0	0
																ASV3027	Acidobacteria	Subgroup_6	unclassified	unclassified	unclassified	cast	1.05	0.76597
																ASV3070	Acidobacteria	Acidobacteriia	Acidobacteriales	unclassified	unclassified	soil	0.421053	0.421053
																ASV3070	Acidobacteria	Acidobacteriia	Acidobacteriales	unclassified	unclassified	gut	0	0
																ASV3070	Acidobacteria	Acidobacteriia	Acidobacteriales	unclassified	unclassified	cast	0.65	0.65
																ASV316	Acidobacteria	Acidobacteriia	Solibacterales	Solibacteraceae_(Subgroup_3)	Candidatus_Solibacter	soil	0	0
																ASV316	Acidobacteria	Acidobacteriia	Solibacterales	Solibacteraceae_(Subgroup_3)	Candidatus_Solibacter	gut	3.375	3.375
																ASV316	Acidobacteria	Acidobacteriia	Solibacterales	Solibacteraceae_(Subgroup_3)	Candidatus_Solibacter	cast	13.05	4.64672
																ASV324	Acidobacteria	Holophagae	Subgroup_7	unclassified	unclassified	soil	5.89474	3.29885
																ASV324	Acidobacteria	Holophagae	Subgroup_7	unclassified	unclassified	gut	15.625	7.56623
																ASV324	Acidobacteria	Holophagae	Subgroup_7	unclassified	unclassified	cast	2.15	1.11515
																ASV325	Acidobacteria	Acidobacteriia	Solibacterales	Solibacteraceae_(Subgroup_3)	Candidatus_Solibacter	soil	12.2632	3.10144
																ASV325	Acidobacteria	Acidobacteriia	Solibacterales	Solibacteraceae_(Subgroup_3)	Candidatus_Solibacter	gut	5.875	5.875
																ASV325	Acidobacteria	Acidobacteriia	Solibacterales	Solibacteraceae_(Subgroup_3)	Candidatus_Solibacter	cast	0	0
																ASV3263	Acidobacteria	Acidobacteriia	Subgroup_2	unclassified	unclassified	soil	0	0
																ASV3263	Acidobacteria	Acidobacteriia	Subgroup_2	unclassified	unclassified	gut	2.375	1.77218
																ASV3263	Acidobacteria	Acidobacteriia	Subgroup_2	unclassified	unclassified	cast	0	0
																ASV3285	Acidobacteria	Subgroup_6	unclassified	unclassified	unclassified	soil	0	0
																ASV3285	Acidobacteria	Subgroup_6	unclassified	unclassified	unclassified	gut	2.375	1.77218
																ASV3285	Acidobacteria	Subgroup_6	unclassified	unclassified	unclassified	cast	0	0
																ASV330	Acidobacteria	Acidobacteriia	Acidobacteriales	unclassified	unclassified	soil	12.4211	2.81425
																ASV330	Acidobacteria	Acidobacteriia	Acidobacteriales	unclassified	unclassified	gut	4.875	4.875
																ASV330	Acidobacteria	Acidobacteriia	Acidobacteriales	unclassified	unclassified	cast	0	0
																ASV333	Acidobacteria	Acidobacteriia	Acidobacteriales	unclassified	unclassified	soil	11.4737	3.26453
																ASV333	Acidobacteria	Acidobacteriia	Acidobacteriales	unclassified	unclassified	gut	7	7
																ASV333	Acidobacteria	Acidobacteriia	Acidobacteriales	unclassified	unclassified	cast	0	0
																ASV336	Acidobacteria	Acidobacteriia	Acidobacteriales	unclassified	unclassified	soil	14.3158	3.01367
																ASV336	Acidobacteria	Acidobacteriia	Acidobacteriales	unclassified	unclassified	gut	0	0
																ASV336	Acidobacteria	Acidobacteriia	Acidobacteriales	unclassified	unclassified	cast	0	0
																ASV338	Acidobacteria	Blastocatellia_(Subgroup_4)	Blastocatellales	Blastocatellaceae	unclassified	soil	6.21053	2.25116
																ASV338	Acidobacteria	Blastocatellia_(Subgroup_4)	Blastocatellales	Blastocatellaceae	unclassified	gut	0	0
																ASV338	Acidobacteria	Blastocatellia_(Subgroup_4)	Blastocatellales	Blastocatellaceae	unclassified	cast	7.6	2.67287
																ASV34	Acidobacteria	Acidobacteriia	Subgroup_2	unclassified	unclassified	soil	73.8421	4.27646
																ASV34	Acidobacteria	Acidobacteriia	Subgroup_2	unclassified	unclassified	gut	49.75	23.5241
																ASV34	Acidobacteria	Acidobacteriia	Subgroup_2	unclassified	unclassified	cast	2.15	2.15
																ASV345	Acidobacteria	Acidobacteriia	Acidobacteriales	unclassified	unclassified	soil	14	2.32077
																ASV345	Acidobacteria	Acidobacteriia	Acidobacteriales	unclassified	unclassified	gut	0	0
																ASV345	Acidobacteria	Acidobacteriia	Acidobacteriales	unclassified	unclassified	cast	0	0
																ASV353	Acidobacteria	Subgroup_6	unclassified	unclassified	unclassified	soil	12	2.64354
																ASV353	Acidobacteria	Subgroup_6	unclassified	unclassified	unclassified	gut	0	0
																ASV353	Acidobacteria	Subgroup_6	unclassified	unclassified	unclassified	cast	1.7	1.7
																ASV3602	Acidobacteria	Blastocatellia_(Subgroup_4)	Blastocatellales	Blastocatellaceae	JGI_0001001-H03	soil	0.894737	0.616037
																ASV3602	Acidobacteria	Blastocatellia_(Subgroup_4)	Blastocatellales	Blastocatellaceae	JGI_0001001-H03	gut	0	0
																ASV3602	Acidobacteria	Blastocatellia_(Subgroup_4)	Blastocatellales	Blastocatellaceae	JGI_0001001-H03	cast	0	0
																ASV365	Acidobacteria	Acidobacteriia	Solibacterales	Solibacteraceae_(Subgroup_3)	Bryobacter	soil	4.63158	1.34036
																ASV365	Acidobacteria	Acidobacteriia	Solibacterales	Solibacteraceae_(Subgroup_3)	Bryobacter	gut	1.5	1.5
																ASV365	Acidobacteria	Acidobacteriia	Solibacterales	Solibacteraceae_(Subgroup_3)	Bryobacter	cast	7.7	1.88638
																ASV369	Acidobacteria	Holophagae	Subgroup_7	unclassified	unclassified	soil	12.4211	2.49832
																ASV369	Acidobacteria	Holophagae	Subgroup_7	unclassified	unclassified	gut	2	2
																ASV369	Acidobacteria	Holophagae	Subgroup_7	unclassified	unclassified	cast	0	0
																ASV37	Acidobacteria	Subgroup_6	unclassified	unclassified	unclassified	soil	28.3684	8.32498
																ASV37	Acidobacteria	Subgroup_6	unclassified	unclassified	unclassified	gut	29.625	16.1676
																ASV37	Acidobacteria	Subgroup_6	unclassified	unclassified	unclassified	cast	51.95	12.0993
																ASV3796	Acidobacteria	Subgroup_6	unclassified	unclassified	unclassified	soil	0	0
																ASV3796	Acidobacteria	Subgroup_6	unclassified	unclassified	unclassified	gut	0	0
																ASV3796	Acidobacteria	Subgroup_6	unclassified	unclassified	unclassified	cast	0.75	0.551911
																ASV381	Acidobacteria	Acidobacteriia	Acidobacteriales	Acidobacteriaceae_(Subgroup_1)	Granulicella	soil	3.15789	1.82936
																ASV381	Acidobacteria	Acidobacteriia	Acidobacteriales	Acidobacteriaceae_(Subgroup_1)	Granulicella	gut	22.875	13.417
																ASV381	Acidobacteria	Acidobacteriia	Acidobacteriales	Acidobacteriaceae_(Subgroup_1)	Granulicella	cast	0	0
																ASV382	Acidobacteria	Subgroup_6	unclassified	unclassified	unclassified	soil	12.7895	5.34515
																ASV382	Acidobacteria	Subgroup_6	unclassified	unclassified	unclassified	gut	0	0
																ASV382	Acidobacteria	Subgroup_6	unclassified	unclassified	unclassified	cast	0	0
																ASV393	Acidobacteria	Blastocatellia_(Subgroup_4)	Blastocatellales	Blastocatellaceae	unclassified	soil	1.84211	1.28022
																ASV393	Acidobacteria	Blastocatellia_(Subgroup_4)	Blastocatellales	Blastocatellaceae	unclassified	gut	7.5	5.57738
																ASV393	Acidobacteria	Blastocatellia_(Subgroup_4)	Blastocatellales	Blastocatellaceae	unclassified	cast	7.05	2.64423
																ASV395	Acidobacteria	Subgroup_6	unclassified	unclassified	unclassified	soil	2.36842	2.36842
																ASV395	Acidobacteria	Subgroup_6	unclassified	unclassified	unclassified	gut	1.25	1.25
																ASV395	Acidobacteria	Subgroup_6	unclassified	unclassified	unclassified	cast	8.95	3.86514
																ASV4005	Acidobacteria	Acidobacteriia	Acidobacteriales	Koribacteraceae	Candidatus_Koribacter	soil	0.473684	0.473684
																ASV4005	Acidobacteria	Acidobacteriia	Acidobacteriales	Koribacteraceae	Candidatus_Koribacter	gut	0	0
																ASV4005	Acidobacteria	Acidobacteriia	Acidobacteriales	Koribacteraceae	Candidatus_Koribacter	cast	0.25	0.25
																ASV402	Acidobacteria	Blastocatellia_(Subgroup_4)	Blastocatellales	Blastocatellaceae	unclassified	soil	4.52632	3.11135
																ASV402	Acidobacteria	Blastocatellia_(Subgroup_4)	Blastocatellales	Blastocatellaceae	unclassified	gut	5	3.60555
																ASV402	Acidobacteria	Blastocatellia_(Subgroup_4)	Blastocatellales	Blastocatellaceae	unclassified	cast	5.15	3.21696
																ASV405	Acidobacteria	Acidobacteriia	Acidobacteriales	unclassified	unclassified	soil	8.47368	3.16631
																ASV405	Acidobacteria	Acidobacteriia	Acidobacteriales	unclassified	unclassified	gut	8	8
																ASV405	Acidobacteria	Acidobacteriia	Acidobacteriales	unclassified	unclassified	cast	0	0
																ASV4058	Acidobacteria	Acidobacteriia	Acidobacteriales	unclassified	unclassified	soil	0.736842	0.403509
																ASV4058	Acidobacteria	Acidobacteriia	Acidobacteriales	unclassified	unclassified	gut	0	0
																ASV4058	Acidobacteria	Acidobacteriia	Acidobacteriales	unclassified	unclassified	cast	0	0
																ASV406	Acidobacteria	Subgroup_6	unclassified	unclassified	unclassified	soil	9.31579	3.76585
																ASV406	Acidobacteria	Subgroup_6	unclassified	unclassified	unclassified	gut	6	6
																ASV406	Acidobacteria	Subgroup_6	unclassified	unclassified	unclassified	cast	0	0
																ASV410	Acidobacteria	Subgroup_6	unclassified	unclassified	unclassified	soil	0.578947	0.578947
																ASV410	Acidobacteria	Subgroup_6	unclassified	unclassified	unclassified	gut	22.875	10.5669
																ASV410	Acidobacteria	Subgroup_6	unclassified	unclassified	unclassified	cast	1.35	0.929842
																ASV4159	Acidobacteria	Subgroup_6	unclassified	unclassified	unclassified	soil	0.315789	0.315789
																ASV4159	Acidobacteria	Subgroup_6	unclassified	unclassified	unclassified	gut	0	0
																ASV4159	Acidobacteria	Subgroup_6	unclassified	unclassified	unclassified	cast	0.35	0.35
																ASV420	Acidobacteria	Acidobacteriia	Subgroup_2	unclassified	unclassified	soil	11.1579	3.21933
																ASV420	Acidobacteria	Acidobacteriia	Subgroup_2	unclassified	unclassified	gut	0	0
																ASV420	Acidobacteria	Acidobacteriia	Subgroup_2	unclassified	unclassified	cast	0	0
																ASV429	Acidobacteria	Acidobacteriia	Solibacterales	Solibacteraceae_(Subgroup_3)	Bryobacter	soil	3.89474	2.15468
																ASV429	Acidobacteria	Acidobacteriia	Solibacterales	Solibacteraceae_(Subgroup_3)	Bryobacter	gut	3.125	3.125
																ASV429	Acidobacteria	Acidobacteriia	Solibacterales	Solibacteraceae_(Subgroup_3)	Bryobacter	cast	5.4	2.00709
																ASV4291	Acidobacteria	Subgroup_17	unclassified	unclassified	unclassified	soil	0	0
																ASV4291	Acidobacteria	Subgroup_17	unclassified	unclassified	unclassified	gut	0.75	0.75
																ASV4291	Acidobacteria	Subgroup_17	unclassified	unclassified	unclassified	cast	0.3	0.3
																ASV446	Acidobacteria	Acidobacteriia	Acidobacteriales	unclassified	unclassified	soil	10.3684	2.28932
																ASV446	Acidobacteria	Acidobacteriia	Acidobacteriales	unclassified	unclassified	gut	0	0
																ASV446	Acidobacteria	Acidobacteriia	Acidobacteriales	unclassified	unclassified	cast	0	0
																ASV4478	Acidobacteria	Acidobacteriia	Acidobacteriales	unclassified	unclassified	soil	0.631579	0.440697
																ASV4478	Acidobacteria	Acidobacteriia	Acidobacteriales	unclassified	unclassified	gut	0	0
																ASV4478	Acidobacteria	Acidobacteriia	Acidobacteriales	unclassified	unclassified	cast	0	0
																ASV448	Acidobacteria	Acidobacteriia	Acidobacteriales	unclassified	unclassified	soil	0	0
																ASV448	Acidobacteria	Acidobacteriia	Acidobacteriales	unclassified	unclassified	gut	19.5	12.601
																ASV448	Acidobacteria	Acidobacteriia	Acidobacteriales	unclassified	unclassified	cast	1.9	1.30968
																ASV452	Acidobacteria	Blastocatellia_(Subgroup_4)	Pyrinomonadales	Pyrinomonadaceae	RB41	soil	10.1579	4.24971
																ASV452	Acidobacteria	Blastocatellia_(Subgroup_4)	Pyrinomonadales	Pyrinomonadaceae	RB41	gut	0	0
																ASV452	Acidobacteria	Blastocatellia_(Subgroup_4)	Pyrinomonadales	Pyrinomonadaceae	RB41	cast	0	0
																ASV4528	Acidobacteria	Acidobacteriia	Acidobacteriales	Acidobacteriaceae_(Subgroup_1)	Granulicella	soil	0.0526316	0.0526316
																ASV4528	Acidobacteria	Acidobacteriia	Acidobacteriales	Acidobacteriaceae_(Subgroup_1)	Granulicella	gut	0.125	0.125
																ASV4528	Acidobacteria	Acidobacteriia	Acidobacteriales	Acidobacteriaceae_(Subgroup_1)	Granulicella	cast	0.45	0.45
																ASV459	Acidobacteria	Acidobacteriia	Solibacterales	Solibacteraceae_(Subgroup_3)	Bryobacter	soil	8.89474	1.70807
																ASV459	Acidobacteria	Acidobacteriia	Solibacterales	Solibacteraceae_(Subgroup_3)	Bryobacter	gut	2.625	2.625
																ASV459	Acidobacteria	Acidobacteriia	Solibacterales	Solibacteraceae_(Subgroup_3)	Bryobacter	cast	0	0
																ASV4600	Acidobacteria	Acidobacteriia	Acidobacteriales	Acidobacteriaceae_(Subgroup_1)	Granulicella	soil	0.263158	0.149895
																ASV4600	Acidobacteria	Acidobacteriia	Acidobacteriales	Acidobacteriaceae_(Subgroup_1)	Granulicella	gut	0	0
																ASV4600	Acidobacteria	Acidobacteriia	Acidobacteriales	Acidobacteriaceae_(Subgroup_1)	Granulicella	cast	0.3	0.252357
																ASV47	Acidobacteria	Acidobacteriia	Solibacterales	Solibacteraceae_(Subgroup_3)	Candidatus_Solibacter	soil	67.1579	9.16524
																ASV47	Acidobacteria	Acidobacteriia	Solibacterales	Solibacteraceae_(Subgroup_3)	Candidatus_Solibacter	gut	7.5	7.5
																ASV47	Acidobacteria	Acidobacteriia	Solibacterales	Solibacteraceae_(Subgroup_3)	Candidatus_Solibacter	cast	12.55	5.17406
																ASV480	Acidobacteria	Acidobacteriia	Acidobacteriales	Acidobacteriaceae_(Subgroup_1)	Edaphobacter	soil	1.89474	1.0342
																ASV480	Acidobacteria	Acidobacteriia	Acidobacteriales	Acidobacteriaceae_(Subgroup_1)	Edaphobacter	gut	2.875	2.875
																ASV480	Acidobacteria	Acidobacteriia	Acidobacteriales	Acidobacteriaceae_(Subgroup_1)	Edaphobacter	cast	6.05	2.00325
																ASV484	Acidobacteria	Acidobacteriia	Solibacterales	Solibacteraceae_(Subgroup_3)	Candidatus_Solibacter	soil	2.26316	1.55943
																ASV484	Acidobacteria	Acidobacteriia	Solibacterales	Solibacteraceae_(Subgroup_3)	Candidatus_Solibacter	gut	6.5	6.5
																ASV484	Acidobacteria	Acidobacteriia	Solibacterales	Solibacteraceae_(Subgroup_3)	Candidatus_Solibacter	cast	4.1	2.14954
																ASV487	Acidobacteria	Acidobacteriia	Acidobacteriales	Acidobacteriaceae_(Subgroup_1)	unclassified	soil	2.73684	1.52147
																ASV487	Acidobacteria	Acidobacteriia	Acidobacteriales	Acidobacteriaceae_(Subgroup_1)	unclassified	gut	0	0
																ASV487	Acidobacteria	Acidobacteriia	Acidobacteriales	Acidobacteriaceae_(Subgroup_1)	unclassified	cast	6.2	1.84334
																ASV489	Acidobacteria	Acidobacteriia	Solibacterales	Solibacteraceae_(Subgroup_3)	Bryobacter	soil	1.21053	0.669201
																ASV489	Acidobacteria	Acidobacteriia	Solibacterales	Solibacteraceae_(Subgroup_3)	Bryobacter	gut	4.375	2.8781
																ASV489	Acidobacteria	Acidobacteriia	Solibacterales	Solibacteraceae_(Subgroup_3)	Bryobacter	cast	5.85	1.71721
																ASV49	Acidobacteria	Acidobacteriia	Acidobacteriales	unclassified	unclassified	soil	57.6316	3.88746
																ASV49	Acidobacteria	Acidobacteriia	Acidobacteriales	unclassified	unclassified	gut	54.25	26.4641
																ASV49	Acidobacteria	Acidobacteriia	Acidobacteriales	unclassified	unclassified	cast	1.8	1.8
																ASV4945	Acidobacteria	Blastocatellia_(Subgroup_4)	Blastocatellales	Blastocatellaceae	unclassified	soil	0.421053	0.421053
																ASV4945	Acidobacteria	Blastocatellia_(Subgroup_4)	Blastocatellales	Blastocatellaceae	unclassified	gut	0	0
																ASV4945	Acidobacteria	Blastocatellia_(Subgroup_4)	Blastocatellales	Blastocatellaceae	unclassified	cast	0.05	0.05
																ASV4993	Acidobacteria	Blastocatellia_(Subgroup_4)	Pyrinomonadales	Pyrinomonadaceae	RB41	soil	0	0
																ASV4993	Acidobacteria	Blastocatellia_(Subgroup_4)	Pyrinomonadales	Pyrinomonadaceae	RB41	gut	0	0
																ASV4993	Acidobacteria	Blastocatellia_(Subgroup_4)	Pyrinomonadales	Pyrinomonadaceae	RB41	cast	0.45	0.311828
																ASV504	Acidobacteria	Acidobacteriia	Subgroup_2	unclassified	unclassified	soil	6.73684	2.66759
																ASV504	Acidobacteria	Acidobacteriia	Subgroup_2	unclassified	unclassified	gut	3.5	3.5
																ASV504	Acidobacteria	Acidobacteriia	Subgroup_2	unclassified	unclassified	cast	0.6	0.6
																ASV505	Acidobacteria	Subgroup_6	unclassified	unclassified	unclassified	soil	0	0
																ASV505	Acidobacteria	Subgroup_6	unclassified	unclassified	unclassified	gut	14.125	10.2582
																ASV505	Acidobacteria	Subgroup_6	unclassified	unclassified	unclassified	cast	2.75	1.90135
																ASV5090	Acidobacteria	Acidobacteriia	Acidobacteriales	unclassified	unclassified	soil	0.473684	0.327746
																ASV5090	Acidobacteria	Acidobacteriia	Acidobacteriales	unclassified	unclassified	gut	0	0
																ASV5090	Acidobacteria	Acidobacteriia	Acidobacteriales	unclassified	unclassified	cast	0	0
																ASV511	Acidobacteria	Subgroup_6	unclassified	unclassified	unclassified	soil	0	0
																ASV511	Acidobacteria	Subgroup_6	unclassified	unclassified	unclassified	gut	9.125	6.0987
																ASV511	Acidobacteria	Subgroup_6	unclassified	unclassified	unclassified	cast	4.7	1.97498
																ASV513	Acidobacteria	Acidobacteriia	Solibacterales	Solibacteraceae_(Subgroup_3)	Bryobacter	soil	1.15789	0.8281
																ASV513	Acidobacteria	Acidobacteriia	Solibacterales	Solibacteraceae_(Subgroup_3)	Bryobacter	gut	11.75	10.5234
																ASV513	Acidobacteria	Acidobacteriia	Solibacterales	Solibacteraceae_(Subgroup_3)	Bryobacter	cast	2.5	1.44277
																ASV517	Acidobacteria	Acidobacteriia	Subgroup_2	unclassified	unclassified	soil	5.10526	2.33696
																ASV517	Acidobacteria	Acidobacteriia	Subgroup_2	unclassified	unclassified	gut	8.625	6.36098
																ASV517	Acidobacteria	Acidobacteriia	Subgroup_2	unclassified	unclassified	cast	0	0
																ASV519	Acidobacteria	Subgroup_6	unclassified	unclassified	unclassified	soil	0	0
																ASV519	Acidobacteria	Subgroup_6	unclassified	unclassified	unclassified	gut	20.5	13.8448
																ASV519	Acidobacteria	Subgroup_6	unclassified	unclassified	unclassified	cast	0	0
																ASV520	Acidobacteria	Acidobacteriia	Acidobacteriales	unclassified	unclassified	soil	4.26316	1.97179
																ASV520	Acidobacteria	Acidobacteriia	Acidobacteriales	unclassified	unclassified	gut	10.375	8.01324
																ASV520	Acidobacteria	Acidobacteriia	Acidobacteriales	unclassified	unclassified	cast	0	0
																ASV527	Acidobacteria	Subgroup_6	unclassified	unclassified	unclassified	soil	0	0
																ASV527	Acidobacteria	Subgroup_6	unclassified	unclassified	unclassified	gut	3.875	3.0026
																ASV527	Acidobacteria	Subgroup_6	unclassified	unclassified	unclassified	cast	6.5	1.99275
																ASV5314	Acidobacteria	Acidobacteriia	Acidobacteriales	Acidobacteriaceae_(Subgroup_1)	unclassified	soil	0.421053	0.289341
																ASV5314	Acidobacteria	Acidobacteriia	Acidobacteriales	Acidobacteriaceae_(Subgroup_1)	unclassified	gut	0	0
																ASV5314	Acidobacteria	Acidobacteriia	Acidobacteriales	Acidobacteriaceae_(Subgroup_1)	unclassified	cast	0	0
																ASV5331	Acidobacteria	Acidobacteriia	Acidobacteriales	unclassified	unclassified	soil	0.421053	0.299276
																ASV5331	Acidobacteria	Acidobacteriia	Acidobacteriales	unclassified	unclassified	gut	0	0
																ASV5331	Acidobacteria	Acidobacteriia	Acidobacteriales	unclassified	unclassified	cast	0	0
																ASV536	Acidobacteria	Blastocatellia_(Subgroup_4)	2024-11-01	unclassified	unclassified	soil	8.31579	2.28656
																ASV536	Acidobacteria	Blastocatellia_(Subgroup_4)	2024-11-01	unclassified	unclassified	gut	0	0
																ASV536	Acidobacteria	Blastocatellia_(Subgroup_4)	2024-11-01	unclassified	unclassified	cast	0	0
																ASV537	Acidobacteria	Blastocatellia_(Subgroup_4)	Blastocatellales	Blastocatellaceae	JGI_0001001-H03	soil	0	0
																ASV537	Acidobacteria	Blastocatellia_(Subgroup_4)	Blastocatellales	Blastocatellaceae	JGI_0001001-H03	gut	0	0
																ASV537	Acidobacteria	Blastocatellia_(Subgroup_4)	Blastocatellales	Blastocatellaceae	JGI_0001001-H03	cast	7.85	2.10423
																ASV541	Acidobacteria	Acidobacteriia	Acidobacteriales	unclassified	unclassified	soil	5.42105	2.95613
																ASV541	Acidobacteria	Acidobacteriia	Acidobacteriales	unclassified	unclassified	gut	6.625	6.625
																ASV541	Acidobacteria	Acidobacteriia	Acidobacteriales	unclassified	unclassified	cast	0	0
																ASV545	Acidobacteria	Acidobacteriia	Acidobacteriales	unclassified	unclassified	soil	2.05263	1.41105
																ASV545	Acidobacteria	Acidobacteriia	Acidobacteriales	unclassified	unclassified	gut	13.5	9.34077
																ASV545	Acidobacteria	Acidobacteriia	Acidobacteriales	unclassified	unclassified	cast	0.4	0.4
																ASV557	Acidobacteria	Acidobacteriia	Solibacterales	Solibacteraceae_(Subgroup_3)	Bryobacter	soil	1.57895	1.57895
																ASV557	Acidobacteria	Acidobacteriia	Solibacterales	Solibacteraceae_(Subgroup_3)	Bryobacter	gut	12.25	8.28456
																ASV557	Acidobacteria	Acidobacteriia	Solibacterales	Solibacteraceae_(Subgroup_3)	Bryobacter	cast	1.15	1.15
																ASV563	Acidobacteria	Subgroup_6	unclassified	unclassified	unclassified	soil	0	0
																ASV563	Acidobacteria	Subgroup_6	unclassified	unclassified	unclassified	gut	18.875	12.699
																ASV563	Acidobacteria	Subgroup_6	unclassified	unclassified	unclassified	cast	0	0
																ASV568	Acidobacteria	Subgroup_6	unclassified	unclassified	unclassified	soil	0	0
																ASV568	Acidobacteria	Subgroup_6	unclassified	unclassified	unclassified	gut	18.375	12.0474
																ASV568	Acidobacteria	Subgroup_6	unclassified	unclassified	unclassified	cast	0	0
																ASV569	Acidobacteria	Acidobacteriia	Solibacterales	Solibacteraceae_(Subgroup_3)	Bryobacter	soil	7.10526	2.33069
																ASV569	Acidobacteria	Acidobacteriia	Solibacterales	Solibacteraceae_(Subgroup_3)	Bryobacter	gut	1.5	1.5
																ASV569	Acidobacteria	Acidobacteriia	Solibacterales	Solibacteraceae_(Subgroup_3)	Bryobacter	cast	0	0
																ASV570	Acidobacteria	Acidobacteriia	Acidobacteriales	unclassified	unclassified	soil	7.73684	3.78195
																ASV570	Acidobacteria	Acidobacteriia	Acidobacteriales	unclassified	unclassified	gut	0	0
																ASV570	Acidobacteria	Acidobacteriia	Acidobacteriales	unclassified	unclassified	cast	0	0
																ASV578	Acidobacteria	Acidobacteriia	Acidobacteriales	unclassified	unclassified	soil	3.84211	2.23249
																ASV578	Acidobacteria	Acidobacteriia	Acidobacteriales	unclassified	unclassified	gut	7.375	5.30141
																ASV578	Acidobacteria	Acidobacteriia	Acidobacteriales	unclassified	unclassified	cast	0.65	0.65
																ASV579	Acidobacteria	Holophagae	Subgroup_7	unclassified	unclassified	soil	7.63158	3.33702
																ASV579	Acidobacteria	Holophagae	Subgroup_7	unclassified	unclassified	gut	0	0
																ASV579	Acidobacteria	Holophagae	Subgroup_7	unclassified	unclassified	cast	0	0
																ASV583	Acidobacteria	Acidobacteriia	Acidobacteriales	unclassified	unclassified	soil	5.26316	3.66814
																ASV583	Acidobacteria	Acidobacteriia	Acidobacteriales	unclassified	unclassified	gut	5.5	5.5
																ASV583	Acidobacteria	Acidobacteriia	Acidobacteriales	unclassified	unclassified	cast	0	0
																ASV584	Acidobacteria	Blastocatellia_(Subgroup_4)	Pyrinomonadales	Pyrinomonadaceae	RB41	soil	6.78947	2.53811
																ASV584	Acidobacteria	Blastocatellia_(Subgroup_4)	Pyrinomonadales	Pyrinomonadaceae	RB41	gut	1.875	1.875
																ASV584	Acidobacteria	Blastocatellia_(Subgroup_4)	Pyrinomonadales	Pyrinomonadaceae	RB41	cast	0	0
																ASV603	Acidobacteria	Acidobacteriia	Subgroup_2	unclassified	unclassified	soil	0	0
																ASV603	Acidobacteria	Acidobacteriia	Subgroup_2	unclassified	unclassified	gut	17.25	9.08049
																ASV603	Acidobacteria	Acidobacteriia	Subgroup_2	unclassified	unclassified	cast	0	0
																ASV608	Acidobacteria	Subgroup_6	unclassified	unclassified	unclassified	soil	0	0
																ASV608	Acidobacteria	Subgroup_6	unclassified	unclassified	unclassified	gut	16.125	8.53655
																ASV608	Acidobacteria	Subgroup_6	unclassified	unclassified	unclassified	cast	0.4	0.4
																ASV6170	Acidobacteria	Acidobacteriia	Acidobacteriales	Koribacteraceae	Candidatus_Koribacter	soil	0.210526	0.163638
																ASV6170	Acidobacteria	Acidobacteriia	Acidobacteriales	Koribacteraceae	Candidatus_Koribacter	gut	0	0
																ASV6170	Acidobacteria	Acidobacteriia	Acidobacteriales	Koribacteraceae	Candidatus_Koribacter	cast	0	0
																ASV618	Acidobacteria	Acidobacteriia	Acidobacteriales	Acidobacteriaceae_(Subgroup_1)	unclassified	soil	7.15789	1.7325
																ASV618	Acidobacteria	Acidobacteriia	Acidobacteriales	Acidobacteriaceae_(Subgroup_1)	unclassified	gut	0	0
																ASV618	Acidobacteria	Acidobacteriia	Acidobacteriales	Acidobacteriaceae_(Subgroup_1)	unclassified	cast	0	0
																ASV627	Acidobacteria	Subgroup_6	unclassified	unclassified	unclassified	soil	6.42105	1.53957
																ASV627	Acidobacteria	Subgroup_6	unclassified	unclassified	unclassified	gut	1.5	1.5
																ASV627	Acidobacteria	Subgroup_6	unclassified	unclassified	unclassified	cast	0	0
																ASV634	Acidobacteria	Subgroup_6	unclassified	unclassified	unclassified	soil	0	0
																ASV634	Acidobacteria	Subgroup_6	unclassified	unclassified	unclassified	gut	16.5	13.5172
																ASV634	Acidobacteria	Subgroup_6	unclassified	unclassified	unclassified	cast	0	0
																ASV639	Acidobacteria	Subgroup_6	unclassified	unclassified	unclassified	soil	0	0
																ASV639	Acidobacteria	Subgroup_6	unclassified	unclassified	unclassified	gut	3.75	3.75
																ASV639	Acidobacteria	Subgroup_6	unclassified	unclassified	unclassified	cast	4.95	2.77629
																ASV640	Acidobacteria	Subgroup_6	unclassified	unclassified	unclassified	soil	0	0
																ASV640	Acidobacteria	Subgroup_6	unclassified	unclassified	unclassified	gut	8.75	8.75
																ASV640	Acidobacteria	Subgroup_6	unclassified	unclassified	unclassified	cast	2.95	2.39459
																ASV642	Acidobacteria	Acidobacteriia	Acidobacteriales	unclassified	unclassified	soil	2.05263	1.43571
																ASV642	Acidobacteria	Acidobacteriia	Acidobacteriales	unclassified	unclassified	gut	11.25	7.37455
																ASV642	Acidobacteria	Acidobacteriia	Acidobacteriales	unclassified	unclassified	cast	0	0
																ASV645	Acidobacteria	Blastocatellia_(Subgroup_4)	Blastocatellales	Blastocatellaceae	JGI_0001001-H03	soil	4.52632	1.42937
																ASV645	Acidobacteria	Blastocatellia_(Subgroup_4)	Blastocatellales	Blastocatellaceae	JGI_0001001-H03	gut	0	0
																ASV645	Acidobacteria	Blastocatellia_(Subgroup_4)	Blastocatellales	Blastocatellaceae	JGI_0001001-H03	cast	2.1	1.00499
																ASV646	Acidobacteria	Subgroup_6	unclassified	unclassified	unclassified	soil	0	0
																ASV646	Acidobacteria	Subgroup_6	unclassified	unclassified	unclassified	gut	3.125	3.125
																ASV646	Acidobacteria	Subgroup_6	unclassified	unclassified	unclassified	cast	5.15	2.35336
																ASV648	Acidobacteria	Acidobacteriia	Subgroup_2	unclassified	unclassified	soil	6.73684	1.27008
																ASV648	Acidobacteria	Acidobacteriia	Subgroup_2	unclassified	unclassified	gut	0	0
																ASV648	Acidobacteria	Acidobacteriia	Subgroup_2	unclassified	unclassified	cast	0	0
																ASV657	Acidobacteria	Acidobacteriia	Solibacterales	Solibacteraceae_(Subgroup_3)	Bryobacter	soil	3.21053	1.33898
																ASV657	Acidobacteria	Acidobacteriia	Solibacterales	Solibacteraceae_(Subgroup_3)	Bryobacter	gut	5.875	3.84725
																ASV657	Acidobacteria	Acidobacteriia	Solibacterales	Solibacteraceae_(Subgroup_3)	Bryobacter	cast	0.9	0.656546
																ASV66	Acidobacteria	Acidobacteriia	Acidobacteriales	unclassified	unclassified	soil	48.2105	3.09648
																ASV66	Acidobacteria	Acidobacteriia	Acidobacteriales	unclassified	unclassified	gut	30.25	13.694
																ASV66	Acidobacteria	Acidobacteriia	Acidobacteriales	unclassified	unclassified	cast	3.75	2.84501
																ASV660	Acidobacteria	Subgroup_6	unclassified	unclassified	unclassified	soil	0	0
																ASV660	Acidobacteria	Subgroup_6	unclassified	unclassified	unclassified	gut	15.75	8.3618
																ASV660	Acidobacteria	Subgroup_6	unclassified	unclassified	unclassified	cast	0	0
																ASV664	Acidobacteria	Acidobacteriia	Solibacterales	Solibacteraceae_(Subgroup_3)	Candidatus_Solibacter	soil	3.21053	3.21053
																ASV664	Acidobacteria	Acidobacteriia	Solibacterales	Solibacteraceae_(Subgroup_3)	Candidatus_Solibacter	gut	8	8
																ASV664	Acidobacteria	Acidobacteriia	Solibacterales	Solibacteraceae_(Subgroup_3)	Candidatus_Solibacter	cast	0	0
																ASV665	Acidobacteria	Acidobacteriia	Subgroup_2	unclassified	unclassified	soil	0.947368	0.947368
																ASV665	Acidobacteria	Acidobacteriia	Subgroup_2	unclassified	unclassified	gut	13.375	6.72665
																ASV665	Acidobacteria	Acidobacteriia	Subgroup_2	unclassified	unclassified	cast	0	0
																ASV667	Acidobacteria	Acidobacteriia	Acidobacteriales	unclassified	unclassified	soil	6.57895	2.4307
																ASV667	Acidobacteria	Acidobacteriia	Acidobacteriales	unclassified	unclassified	gut	0	0
																ASV667	Acidobacteria	Acidobacteriia	Acidobacteriales	unclassified	unclassified	cast	0	0
																ASV674	Acidobacteria	Acidobacteriia	Subgroup_2	unclassified	unclassified	soil	0	0
																ASV674	Acidobacteria	Acidobacteriia	Subgroup_2	unclassified	unclassified	gut	15.375	10.0657
																ASV674	Acidobacteria	Acidobacteriia	Subgroup_2	unclassified	unclassified	cast	0	0
																ASV675	Acidobacteria	Subgroup_6	unclassified	unclassified	unclassified	soil	2.68421	1.23793
																ASV675	Acidobacteria	Subgroup_6	unclassified	unclassified	unclassified	gut	9	6.31325
																ASV675	Acidobacteria	Subgroup_6	unclassified	unclassified	unclassified	cast	0	0
																ASV687	Acidobacteria	Subgroup_17	unclassified	unclassified	unclassified	soil	5.15789	1.71041
																ASV687	Acidobacteria	Subgroup_17	unclassified	unclassified	unclassified	gut	1.5	1.5
																ASV687	Acidobacteria	Subgroup_17	unclassified	unclassified	unclassified	cast	0.5	0.5
																ASV692	Acidobacteria	Acidobacteriia	Acidobacteriales	unclassified	unclassified	soil	2.21053	1.40712
																ASV692	Acidobacteria	Acidobacteriia	Acidobacteriales	unclassified	unclassified	gut	9.625	6.94863
																ASV692	Acidobacteria	Acidobacteriia	Acidobacteriales	unclassified	unclassified	cast	0	0
																ASV703	Acidobacteria	Subgroup_6	unclassified	unclassified	unclassified	soil	0	0
																ASV703	Acidobacteria	Subgroup_6	unclassified	unclassified	unclassified	gut	14.5	9.49436
																ASV703	Acidobacteria	Subgroup_6	unclassified	unclassified	unclassified	cast	0	0
																ASV705	Acidobacteria	Subgroup_6	unclassified	unclassified	unclassified	soil	0	0
																ASV705	Acidobacteria	Subgroup_6	unclassified	unclassified	unclassified	gut	14.375	9.9138
																ASV705	Acidobacteria	Subgroup_6	unclassified	unclassified	unclassified	cast	0	0
																ASV715	Acidobacteria	Acidobacteriia	Solibacterales	Solibacteraceae_(Subgroup_3)	Candidatus_Solibacter	soil	1.78947	1.78947
																ASV715	Acidobacteria	Acidobacteriia	Solibacterales	Solibacteraceae_(Subgroup_3)	Candidatus_Solibacter	gut	9.875	6.4654
																ASV715	Acidobacteria	Acidobacteriia	Solibacterales	Solibacteraceae_(Subgroup_3)	Candidatus_Solibacter	cast	0	0
																ASV735	Acidobacteria	Acidobacteriia	Acidobacteriales	unclassified	unclassified	soil	2	0.875261
																ASV735	Acidobacteria	Acidobacteriia	Acidobacteriales	unclassified	unclassified	gut	8.875	7.42928
																ASV735	Acidobacteria	Acidobacteriia	Acidobacteriales	unclassified	unclassified	cast	0	0
																ASV736	Acidobacteria	Acidobacteriia	Acidobacteriales	unclassified	unclassified	soil	5.36842	2.62156
																ASV736	Acidobacteria	Acidobacteriia	Acidobacteriales	unclassified	unclassified	gut	0.875	0.875
																ASV736	Acidobacteria	Acidobacteriia	Acidobacteriales	unclassified	unclassified	cast	0	0
																ASV743	Acidobacteria	Subgroup_6	unclassified	unclassified	unclassified	soil	3.89474	1.86362
																ASV743	Acidobacteria	Subgroup_6	unclassified	unclassified	unclassified	gut	2.75	2.75
																ASV743	Acidobacteria	Subgroup_6	unclassified	unclassified	unclassified	cast	0.55	0.55
																ASV744	Acidobacteria	Acidobacteriia	Solibacterales	Solibacteraceae_(Subgroup_3)	Bryobacter	soil	0.526316	0.526316
																ASV744	Acidobacteria	Acidobacteriia	Solibacterales	Solibacteraceae_(Subgroup_3)	Bryobacter	gut	9	4.69042
																ASV744	Acidobacteria	Acidobacteriia	Solibacterales	Solibacteraceae_(Subgroup_3)	Bryobacter	cast	1.25	0.879219
																ASV753	Acidobacteria	Subgroup_6	unclassified	unclassified	unclassified	soil	0	0
																ASV753	Acidobacteria	Subgroup_6	unclassified	unclassified	unclassified	gut	13.25	9.18607
																ASV753	Acidobacteria	Subgroup_6	unclassified	unclassified	unclassified	cast	0	0
																ASV755	Acidobacteria	Thermoanaerobaculia	Thermoanaerobaculales	Thermoanaerobaculaceae	Subgroup_10	soil	5.57895	1.95313
																ASV755	Acidobacteria	Thermoanaerobaculia	Thermoanaerobaculales	Thermoanaerobaculaceae	Subgroup_10	gut	0	0
																ASV755	Acidobacteria	Thermoanaerobaculia	Thermoanaerobaculales	Thermoanaerobaculaceae	Subgroup_10	cast	0	0
																ASV757	Acidobacteria	Subgroup_6	unclassified	unclassified	unclassified	soil	0.473684	0.473684
																ASV757	Acidobacteria	Subgroup_6	unclassified	unclassified	unclassified	gut	5.875	3.93899
																ASV757	Acidobacteria	Subgroup_6	unclassified	unclassified	unclassified	cast	2.45	1.34649
																ASV758	Acidobacteria	Acidobacteriia	Acidobacteriales	Acidobacteriaceae_(Subgroup_1)	Occallatibacter	soil	2.94737	1.25766
																ASV758	Acidobacteria	Acidobacteriia	Acidobacteriales	Acidobacteriaceae_(Subgroup_1)	Occallatibacter	gut	5.125	3.36705
																ASV758	Acidobacteria	Acidobacteriia	Acidobacteriales	Acidobacteriaceae_(Subgroup_1)	Occallatibacter	cast	0.4	0.4
																ASV759	Acidobacteria	Acidobacteriia	Subgroup_2	unclassified	unclassified	soil	0	0
																ASV759	Acidobacteria	Acidobacteriia	Subgroup_2	unclassified	unclassified	gut	13.125	9.94527
																ASV759	Acidobacteria	Acidobacteriia	Subgroup_2	unclassified	unclassified	cast	0	0
																ASV760	Acidobacteria	Acidobacteriia	Solibacterales	Solibacteraceae_(Subgroup_3)	Candidatus_Solibacter	soil	0	0
																ASV760	Acidobacteria	Acidobacteriia	Solibacterales	Solibacteraceae_(Subgroup_3)	Candidatus_Solibacter	gut	13.125	8.70845
																ASV760	Acidobacteria	Acidobacteriia	Solibacterales	Solibacteraceae_(Subgroup_3)	Candidatus_Solibacter	cast	0	0
																ASV784	Acidobacteria	Acidobacteriia	Subgroup_2	unclassified	unclassified	soil	1.73684	1.73684
																ASV784	Acidobacteria	Acidobacteriia	Subgroup_2	unclassified	unclassified	gut	8.5	8.5
																ASV784	Acidobacteria	Acidobacteriia	Subgroup_2	unclassified	unclassified	cast	0	0
																ASV789	Acidobacteria	Acidobacteriia	Acidobacteriales	unclassified	unclassified	soil	1.31579	1.31579
																ASV789	Acidobacteria	Acidobacteriia	Acidobacteriales	unclassified	unclassified	gut	7.375	4.83639
																ASV789	Acidobacteria	Acidobacteriia	Acidobacteriales	unclassified	unclassified	cast	0.8	0.8
																ASV795	Acidobacteria	Acidobacteriia	Acidobacteriales	unclassified	unclassified	soil	3.89474	1.62202
																ASV795	Acidobacteria	Acidobacteriia	Acidobacteriales	unclassified	unclassified	gut	3.25	3.25
																ASV795	Acidobacteria	Acidobacteriia	Acidobacteriales	unclassified	unclassified	cast	0	0
																ASV805	Acidobacteria	Acidobacteriia	Solibacterales	Solibacteraceae_(Subgroup_3)	Candidatus_Solibacter	soil	2.42105	1.32302
																ASV805	Acidobacteria	Acidobacteriia	Solibacterales	Solibacteraceae_(Subgroup_3)	Candidatus_Solibacter	gut	2.875	2.875
																ASV805	Acidobacteria	Acidobacteriia	Solibacterales	Solibacteraceae_(Subgroup_3)	Candidatus_Solibacter	cast	1.45	1.45
																ASV827	Acidobacteria	Subgroup_5	unclassified	unclassified	unclassified	soil	0.473684	0.473684
																ASV827	Acidobacteria	Subgroup_5	unclassified	unclassified	unclassified	gut	2.25	1.48504
																ASV827	Acidobacteria	Subgroup_5	unclassified	unclassified	unclassified	cast	3.4	1.55834
																ASV830	Acidobacteria	Acidobacteriia	Acidobacteriales	Acidobacteriaceae_(Subgroup_1)	Terracidiphilus	soil	2.57895	1.3814
																ASV830	Acidobacteria	Acidobacteriia	Acidobacteriales	Acidobacteriaceae_(Subgroup_1)	Terracidiphilus	gut	2.25	2.25
																ASV830	Acidobacteria	Acidobacteriia	Acidobacteriales	Acidobacteriaceae_(Subgroup_1)	Terracidiphilus	cast	1.4	0.974409
																ASV834	Acidobacteria	Acidobacteriia	Solibacterales	Solibacteraceae_(Subgroup_3)	Bryobacter	soil	3.42105	1.07691
																ASV834	Acidobacteria	Acidobacteriia	Solibacterales	Solibacteraceae_(Subgroup_3)	Bryobacter	gut	3.75	2.78869
																ASV834	Acidobacteria	Acidobacteriia	Solibacterales	Solibacteraceae_(Subgroup_3)	Bryobacter	cast	0	0
																ASV839	Acidobacteria	Acidobacteriia	Acidobacteriales	unclassified	unclassified	soil	0	0
																ASV839	Acidobacteria	Acidobacteriia	Acidobacteriales	unclassified	unclassified	gut	11.75	8.5581
																ASV839	Acidobacteria	Acidobacteriia	Acidobacteriales	unclassified	unclassified	cast	0	0
																ASV841	Acidobacteria	Blastocatellia_(Subgroup_4)	Blastocatellales	Blastocatellaceae	JGI_0001001-H03	soil	0	0
																ASV841	Acidobacteria	Blastocatellia_(Subgroup_4)	Blastocatellales	Blastocatellaceae	JGI_0001001-H03	gut	2	1.61466
																ASV841	Acidobacteria	Blastocatellia_(Subgroup_4)	Blastocatellales	Blastocatellaceae	JGI_0001001-H03	cast	3.35	3.35
																ASV845	Acidobacteria	Subgroup_17	unclassified	unclassified	unclassified	soil	3	1.38918
																ASV845	Acidobacteria	Subgroup_17	unclassified	unclassified	unclassified	gut	4.5	3.15663
																ASV845	Acidobacteria	Subgroup_17	unclassified	unclassified	unclassified	cast	0	0
																ASV861	Acidobacteria	Subgroup_6	unclassified	unclassified	unclassified	soil	0.421053	0.421053
																ASV861	Acidobacteria	Subgroup_6	unclassified	unclassified	unclassified	gut	9.375	9.375
																ASV861	Acidobacteria	Subgroup_6	unclassified	unclassified	unclassified	cast	0.4	0.4
																ASV866	Acidobacteria	Subgroup_6	unclassified	unclassified	unclassified	soil	4.31579	2.11656
																ASV866	Acidobacteria	Subgroup_6	unclassified	unclassified	unclassified	gut	0	0
																ASV866	Acidobacteria	Subgroup_6	unclassified	unclassified	unclassified	cast	0.4	0.4
																ASV871	Acidobacteria	Acidobacteriia	Subgroup_2	unclassified	unclassified	soil	0	0
																ASV871	Acidobacteria	Acidobacteriia	Subgroup_2	unclassified	unclassified	gut	9	7.11136
																ASV871	Acidobacteria	Acidobacteriia	Subgroup_2	unclassified	unclassified	cast	0.85	0.61248
																ASV874	Acidobacteria	Acidobacteriia	Acidobacteriales	unclassified	unclassified	soil	4.68421	2.03917
																ASV874	Acidobacteria	Acidobacteriia	Acidobacteriales	unclassified	unclassified	gut	0	0
																ASV874	Acidobacteria	Acidobacteriia	Acidobacteriales	unclassified	unclassified	cast	0	0
																ASV88	Acidobacteria	Holophagae	Subgroup_7	unclassified	unclassified	soil	51.8421	7.66219
																ASV88	Acidobacteria	Holophagae	Subgroup_7	unclassified	unclassified	gut	0	0
																ASV88	Acidobacteria	Holophagae	Subgroup_7	unclassified	unclassified	cast	0	0
																ASV886	Acidobacteria	Acidobacteriia	Acidobacteriales	Koribacteraceae	Candidatus_Koribacter	soil	4	1.60226
																ASV886	Acidobacteria	Acidobacteriia	Acidobacteriales	Koribacteraceae	Candidatus_Koribacter	gut	0	0
																ASV886	Acidobacteria	Acidobacteriia	Acidobacteriales	Koribacteraceae	Candidatus_Koribacter	cast	0.55	0.55
																ASV893	Acidobacteria	Subgroup_5	unclassified	unclassified	unclassified	soil	4	1.84327
																ASV893	Acidobacteria	Subgroup_5	unclassified	unclassified	unclassified	gut	1.25	1.25
																ASV893	Acidobacteria	Subgroup_5	unclassified	unclassified	unclassified	cast	0	0
																ASV90	Acidobacteria	Acidobacteriia	Solibacterales	Solibacteraceae_(Subgroup_3)	Bryobacter	soil	40.5789	2.33623
																ASV90	Acidobacteria	Acidobacteriia	Solibacterales	Solibacteraceae_(Subgroup_3)	Bryobacter	gut	21.625	14.1799
																ASV90	Acidobacteria	Acidobacteriia	Solibacterales	Solibacteraceae_(Subgroup_3)	Bryobacter	cast	1.3	0.768115
																ASV902	Acidobacteria	Subgroup_17	unclassified	unclassified	unclassified	soil	3.57895	1.59186
																ASV902	Acidobacteria	Subgroup_17	unclassified	unclassified	unclassified	gut	2.125	2.125
																ASV902	Acidobacteria	Subgroup_17	unclassified	unclassified	unclassified	cast	0	0
																ASV904	Acidobacteria	Acidobacteriia	Acidobacteriales	unclassified	unclassified	soil	4.47368	2.12252
																ASV904	Acidobacteria	Acidobacteriia	Acidobacteriales	unclassified	unclassified	gut	0	0
																ASV904	Acidobacteria	Acidobacteriia	Acidobacteriales	unclassified	unclassified	cast	0	0
																ASV91	Acidobacteria	Holophagae	Subgroup_7	unclassified	unclassified	soil	48	5.16681
																ASV91	Acidobacteria	Holophagae	Subgroup_7	unclassified	unclassified	gut	5.125	5.125
																ASV91	Acidobacteria	Holophagae	Subgroup_7	unclassified	unclassified	cast	0.85	0.85
																ASV911	Acidobacteria	Subgroup_6	unclassified	unclassified	unclassified	soil	0	0
																ASV911	Acidobacteria	Subgroup_6	unclassified	unclassified	unclassified	gut	0.75	0.75
																ASV911	Acidobacteria	Subgroup_6	unclassified	unclassified	unclassified	cast	3.9	2.69297
																ASV919	Acidobacteria	Acidobacteriia	Acidobacteriales	unclassified	unclassified	soil	3.26316	1.93436
																ASV919	Acidobacteria	Acidobacteriia	Acidobacteriales	unclassified	unclassified	gut	2.625	2.625
																ASV919	Acidobacteria	Acidobacteriia	Acidobacteriales	unclassified	unclassified	cast	0	0
																ASV937	Acidobacteria	Acidobacteriia	Acidobacteriales	unclassified	unclassified	soil	4.26316	3.09673
																ASV937	Acidobacteria	Acidobacteriia	Acidobacteriales	unclassified	unclassified	gut	0	0
																ASV937	Acidobacteria	Acidobacteriia	Acidobacteriales	unclassified	unclassified	cast	0	0
																ASV951	Acidobacteria	Subgroup_5	unclassified	unclassified	unclassified	soil	4.21053	2.31772
																ASV951	Acidobacteria	Subgroup_5	unclassified	unclassified	unclassified	gut	0	0
																ASV951	Acidobacteria	Subgroup_5	unclassified	unclassified	unclassified	cast	0	0
																ASV974	Acidobacteria	Acidobacteriia	Solibacterales	Solibacteraceae_(Subgroup_3)	Candidatus_Solibacter	soil	2.05263	2.05263
																ASV974	Acidobacteria	Acidobacteriia	Solibacterales	Solibacteraceae_(Subgroup_3)	Candidatus_Solibacter	gut	4.75	4.75
																ASV974	Acidobacteria	Acidobacteriia	Solibacterales	Solibacteraceae_(Subgroup_3)	Candidatus_Solibacter	cast	0	0
																ASV976	Acidobacteria	Subgroup_6	unclassified	unclassified	unclassified	soil	0	0
																ASV976	Acidobacteria	Subgroup_6	unclassified	unclassified	unclassified	gut	9.625	7.81925
																ASV976	Acidobacteria	Subgroup_6	unclassified	unclassified	unclassified	cast	0	0
																ASV980	Acidobacteria	Acidobacteriia	Acidobacteriales	Koribacteraceae	Candidatus_Koribacter	soil	0	0
																ASV980	Acidobacteria	Acidobacteriia	Acidobacteriales	Koribacteraceae	Candidatus_Koribacter	gut	7.5	5.40833
																ASV980	Acidobacteria	Acidobacteriia	Acidobacteriales	Koribacteraceae	Candidatus_Koribacter	cast	0.8	0.8
																ASV981	Acidobacteria	Acidobacteriia	Acidobacteriales	Acidobacteriaceae_(Subgroup_1)	Edaphobacter	soil	1.15789	0.8281
																ASV981	Acidobacteria	Acidobacteriia	Acidobacteriales	Acidobacteriaceae_(Subgroup_1)	Edaphobacter	gut	4.375	4.375
																ASV981	Acidobacteria	Acidobacteriia	Acidobacteriales	Acidobacteriaceae_(Subgroup_1)	Edaphobacter	cast	0.95	0.662829
																ASV999	Acidobacteria	Acidobacteriia	Acidobacteriales	unclassified	unclassified	soil	3.94737	1.61041
																ASV999	Acidobacteria	Acidobacteriia	Acidobacteriales	unclassified	unclassified	gut	0	0
																ASV999	Acidobacteria	Acidobacteriia	Acidobacteriales	unclassified	unclassified	cast	0	0
																ASV1019	Actinobacteria	Thermoleophilia	Solirubrobacterales	Solirubrobacteraceae	Conexibacter	soil	0	0
																ASV1019	Actinobacteria	Thermoleophilia	Solirubrobacterales	Solirubrobacteraceae	Conexibacter	gut	9	6.03857
																ASV1019	Actinobacteria	Thermoleophilia	Solirubrobacterales	Solirubrobacteraceae	Conexibacter	cast	0	0
																ASV1020	Actinobacteria	Thermoleophilia	Solirubrobacterales	Solirubrobacteraceae	Conexibacter	soil	0	0
																ASV1020	Actinobacteria	Thermoleophilia	Solirubrobacterales	Solirubrobacteraceae	Conexibacter	gut	9	4.68661
																ASV1020	Actinobacteria	Thermoleophilia	Solirubrobacterales	Solirubrobacteraceae	Conexibacter	cast	0	0
																ASV1035	Actinobacteria	Thermoleophilia	Gaiellales	unclassified	unclassified	soil	0	0
																ASV1035	Actinobacteria	Thermoleophilia	Gaiellales	unclassified	unclassified	gut	8.875	6.20322
																ASV1035	Actinobacteria	Thermoleophilia	Gaiellales	unclassified	unclassified	cast	0	0
																ASV1037	Actinobacteria	Thermoleophilia	Solirubrobacterales	Solirubrobacteraceae	Conexibacter	soil	0	0
																ASV1037	Actinobacteria	Thermoleophilia	Solirubrobacterales	Solirubrobacteraceae	Conexibacter	gut	8.875	5.87196
																ASV1037	Actinobacteria	Thermoleophilia	Solirubrobacterales	Solirubrobacteraceae	Conexibacter	cast	0	0
																ASV1050	Actinobacteria	Actinobacteria	Kineosporiales	Kineosporiaceae	Quadrisphaera	soil	0	0
																ASV1050	Actinobacteria	Actinobacteria	Kineosporiales	Kineosporiaceae	Quadrisphaera	gut	4.75	4.75
																ASV1050	Actinobacteria	Actinobacteria	Kineosporiales	Kineosporiaceae	Quadrisphaera	cast	1.6	1.6
																ASV1065	Actinobacteria	Thermoleophilia	Solirubrobacterales	Solirubrobacteraceae	Conexibacter	soil	0.631579	0.631579
																ASV1065	Actinobacteria	Thermoleophilia	Solirubrobacterales	Solirubrobacteraceae	Conexibacter	gut	4.125	3.46636
																ASV1065	Actinobacteria	Thermoleophilia	Solirubrobacterales	Solirubrobacteraceae	Conexibacter	cast	1.2	0.66728
																ASV1078	Actinobacteria	Thermoleophilia	Gaiellales	unclassified	unclassified	soil	0	0
																ASV1078	Actinobacteria	Thermoleophilia	Gaiellales	unclassified	unclassified	gut	4	2.62543
																ASV1078	Actinobacteria	Thermoleophilia	Gaiellales	unclassified	unclassified	cast	1.8	1.31309
																ASV1079	Actinobacteria	Actinobacteria	Frankiales	Geodermatophilaceae	unclassified	soil	0	0
																ASV1079	Actinobacteria	Actinobacteria	Frankiales	Geodermatophilaceae	unclassified	gut	6.875	4.58038
																ASV1079	Actinobacteria	Actinobacteria	Frankiales	Geodermatophilaceae	unclassified	cast	0.65	0.65
																ASV1093	Actinobacteria	Actinobacteria	Streptomycetales	Streptomycetaceae	Streptomyces	soil	0	0
																ASV1093	Actinobacteria	Actinobacteria	Streptomycetales	Streptomycetaceae	Streptomyces	gut	8.25	4.34556
																ASV1093	Actinobacteria	Actinobacteria	Streptomycetales	Streptomycetaceae	Streptomyces	cast	0	0
																ASV110	Actinobacteria	Actinobacteria	Kineosporiales	Kineosporiaceae	unclassified	soil	8.47368	2.82674
																ASV110	Actinobacteria	Actinobacteria	Kineosporiales	Kineosporiaceae	unclassified	gut	45.125	17.1823
																ASV110	Actinobacteria	Actinobacteria	Kineosporiales	Kineosporiaceae	unclassified	cast	14.8	3.29401
																ASV1102	Actinobacteria	Thermoleophilia	Solirubrobacterales	67-14	unclassified	soil	0	0
																ASV1102	Actinobacteria	Thermoleophilia	Solirubrobacterales	67-14	unclassified	gut	7.125	4.7413
																ASV1102	Actinobacteria	Thermoleophilia	Solirubrobacterales	67-14	unclassified	cast	0.45	0.45
																ASV1111	Actinobacteria	Thermoleophilia	Gaiellales	unclassified	unclassified	soil	0	0
																ASV1111	Actinobacteria	Thermoleophilia	Gaiellales	unclassified	unclassified	gut	5.5	3.72252
																ASV1111	Actinobacteria	Thermoleophilia	Gaiellales	unclassified	unclassified	cast	1.05	1.05
																ASV1121	Actinobacteria	Thermoleophilia	Gaiellales	unclassified	unclassified	soil	0	0
																ASV1121	Actinobacteria	Thermoleophilia	Gaiellales	unclassified	unclassified	gut	4.875	4.875
																ASV1121	Actinobacteria	Thermoleophilia	Gaiellales	unclassified	unclassified	cast	1.25	1.25
																ASV1122	Actinobacteria	Actinobacteria	Catenulisporales	Actinospicaceae	Actinospica	soil	0.315789	0.315789
																ASV1122	Actinobacteria	Actinobacteria	Catenulisporales	Actinospicaceae	Actinospica	gut	7.25	4.92715
																ASV1122	Actinobacteria	Actinobacteria	Catenulisporales	Actinospicaceae	Actinospica	cast	0	0
																ASV1131	Actinobacteria	Thermoleophilia	Gaiellales	unclassified	unclassified	soil	0	0
																ASV1131	Actinobacteria	Thermoleophilia	Gaiellales	unclassified	unclassified	gut	3.125	3.125
																ASV1131	Actinobacteria	Thermoleophilia	Gaiellales	unclassified	unclassified	cast	1.9	1.35705
																ASV1135	Actinobacteria	Actinobacteria	Frankiales	Acidothermaceae	Acidothermus	soil	0	0
																ASV1135	Actinobacteria	Actinobacteria	Frankiales	Acidothermaceae	Acidothermus	gut	7.875	5.177
																ASV1135	Actinobacteria	Actinobacteria	Frankiales	Acidothermaceae	Acidothermus	cast	0	0
																ASV1146	Actinobacteria	Thermoleophilia	Gaiellales	unclassified	unclassified	soil	0	0
																ASV1146	Actinobacteria	Thermoleophilia	Gaiellales	unclassified	unclassified	gut	7.75	6.1084
																ASV1146	Actinobacteria	Thermoleophilia	Gaiellales	unclassified	unclassified	cast	0	0
																ASV1148	Actinobacteria	Actinobacteria	Frankiales	Frankiaceae	Jatrophihabitans	soil	0	0
																ASV1148	Actinobacteria	Actinobacteria	Frankiales	Frankiaceae	Jatrophihabitans	gut	7.75	5.19873
																ASV1148	Actinobacteria	Actinobacteria	Frankiales	Frankiaceae	Jatrophihabitans	cast	0	0
																ASV1150	Actinobacteria	Thermoleophilia	Gaiellales	Gaiellaceae	Gaiella	soil	0	0
																ASV1150	Actinobacteria	Thermoleophilia	Gaiellales	Gaiellaceae	Gaiella	gut	7.75	5.81178
																ASV1150	Actinobacteria	Thermoleophilia	Gaiellales	Gaiellaceae	Gaiella	cast	0	0
																ASV1155	Actinobacteria	Actinobacteria	Corynebacteriales	Mycobacteriaceae	Mycobacterium	soil	0.526316	0.526316
																ASV1155	Actinobacteria	Actinobacteria	Corynebacteriales	Mycobacteriaceae	Mycobacterium	gut	6.375	2.42706
																ASV1155	Actinobacteria	Actinobacteria	Corynebacteriales	Mycobacteriaceae	Mycobacterium	cast	0	0
																ASV1166	Actinobacteria	Acidimicrobiia	IMCC26256	unclassified	unclassified	soil	0.421053	0.421053
																ASV1166	Actinobacteria	Acidimicrobiia	IMCC26256	unclassified	unclassified	gut	6.625	3.3109
																ASV1166	Actinobacteria	Acidimicrobiia	IMCC26256	unclassified	unclassified	cast	0	0
																ASV1180	Actinobacteria	MB-A2-108	unclassified	unclassified	unclassified	soil	0.421053	0.421053
																ASV1180	Actinobacteria	MB-A2-108	unclassified	unclassified	unclassified	gut	6.5	6.5
																ASV1180	Actinobacteria	MB-A2-108	unclassified	unclassified	unclassified	cast	0	0
																ASV1182	Actinobacteria	Thermoleophilia	Gaiellales	unclassified	unclassified	soil	0.684211	0.684211
																ASV1182	Actinobacteria	Thermoleophilia	Gaiellales	unclassified	unclassified	gut	0	0
																ASV1182	Actinobacteria	Thermoleophilia	Gaiellales	unclassified	unclassified	cast	2.35	2.35
																ASV1202	Actinobacteria	Actinobacteria	Micrococcales	Microbacteriaceae	unclassified	soil	0	0
																ASV1202	Actinobacteria	Actinobacteria	Micrococcales	Microbacteriaceae	unclassified	gut	0	0
																ASV1202	Actinobacteria	Actinobacteria	Micrococcales	Microbacteriaceae	unclassified	cast	2.9	1.60738
																ASV1219	Actinobacteria	Thermoleophilia	Gaiellales	unclassified	unclassified	soil	0	0
																ASV1219	Actinobacteria	Thermoleophilia	Gaiellales	unclassified	unclassified	gut	3.25	3.25
																ASV1219	Actinobacteria	Thermoleophilia	Gaiellales	unclassified	unclassified	cast	1.55	1.0674
																ASV1224	Actinobacteria	Thermoleophilia	Gaiellales	unclassified	unclassified	soil	0	0
																ASV1224	Actinobacteria	Thermoleophilia	Gaiellales	unclassified	unclassified	gut	5	3.4641
																ASV1224	Actinobacteria	Thermoleophilia	Gaiellales	unclassified	unclassified	cast	0.85	0.85
																ASV1232	Actinobacteria	Actinobacteria	Micromonosporales	Micromonosporaceae	unclassified	soil	0	0
																ASV1232	Actinobacteria	Actinobacteria	Micromonosporales	Micromonosporaceae	unclassified	gut	3.625	2.41969
																ASV1232	Actinobacteria	Actinobacteria	Micromonosporales	Micromonosporaceae	unclassified	cast	1.35	0.963205
																ASV1239	Actinobacteria	Actinobacteria	Pseudonocardiales	Pseudonocardiaceae	unclassified	soil	0.684211	0.684211
																ASV1239	Actinobacteria	Actinobacteria	Pseudonocardiales	Pseudonocardiaceae	unclassified	gut	3	2
																ASV1239	Actinobacteria	Actinobacteria	Pseudonocardiales	Pseudonocardiaceae	unclassified	cast	0.95	0.95
																ASV125	Actinobacteria	Thermoleophilia	Gaiellales	unclassified	unclassified	soil	13	2.91698
																ASV125	Actinobacteria	Thermoleophilia	Gaiellales	unclassified	unclassified	gut	44	15.1811
																ASV125	Actinobacteria	Thermoleophilia	Gaiellales	unclassified	unclassified	cast	6.75	2.22175
																ASV1255	Actinobacteria	MB-A2-108	unclassified	unclassified	unclassified	soil	0	0
																ASV1255	Actinobacteria	MB-A2-108	unclassified	unclassified	unclassified	gut	6.875	4.52547
																ASV1255	Actinobacteria	MB-A2-108	unclassified	unclassified	unclassified	cast	0	0
																ASV1256	Actinobacteria	Thermoleophilia	Solirubrobacterales	unclassified	unclassified	soil	0	0
																ASV1256	Actinobacteria	Thermoleophilia	Solirubrobacterales	unclassified	unclassified	gut	6.875	3.39347
																ASV1256	Actinobacteria	Thermoleophilia	Solirubrobacterales	unclassified	unclassified	cast	0	0
																ASV1260	Actinobacteria	Actinobacteria	Frankiales	Acidothermaceae	Acidothermus	soil	0	0
																ASV1260	Actinobacteria	Actinobacteria	Frankiales	Acidothermaceae	Acidothermus	gut	5.875	5.875
																ASV1260	Actinobacteria	Actinobacteria	Frankiales	Acidothermaceae	Acidothermus	cast	0.4	0.4
																ASV1267	Actinobacteria	Thermoleophilia	Gaiellales	unclassified	unclassified	soil	0	0
																ASV1267	Actinobacteria	Thermoleophilia	Gaiellales	unclassified	unclassified	gut	2.625	2.625
																ASV1267	Actinobacteria	Thermoleophilia	Gaiellales	unclassified	unclassified	cast	1.7	1.7
																ASV1276	Actinobacteria	Thermoleophilia	Solirubrobacterales	Solirubrobacteraceae	Solirubrobacter	soil	1.42105	1.42105
																ASV1276	Actinobacteria	Thermoleophilia	Solirubrobacterales	Solirubrobacteraceae	Solirubrobacter	gut	3.5	3.5
																ASV1276	Actinobacteria	Thermoleophilia	Solirubrobacterales	Solirubrobacteraceae	Solirubrobacter	cast	0	0
																ASV128	Actinobacteria	Thermoleophilia	Gaiellales	unclassified	unclassified	soil	30.7368	3.08632
																ASV128	Actinobacteria	Thermoleophilia	Gaiellales	unclassified	unclassified	gut	17.125	7.20723
																ASV128	Actinobacteria	Thermoleophilia	Gaiellales	unclassified	unclassified	cast	0	0
																ASV1285	Actinobacteria	Actinobacteria	Propionibacteriales	Nocardioidaceae	Marmoricola	soil	0.631579	0.631579
																ASV1285	Actinobacteria	Actinobacteria	Propionibacteriales	Nocardioidaceae	Marmoricola	gut	3	3
																ASV1285	Actinobacteria	Actinobacteria	Propionibacteriales	Nocardioidaceae	Marmoricola	cast	0.9	0.9
																ASV1286	Actinobacteria	Actinobacteria	Frankiales	Acidothermaceae	Acidothermus	soil	0	0
																ASV1286	Actinobacteria	Actinobacteria	Frankiales	Acidothermaceae	Acidothermus	gut	6.75	4.51881
																ASV1286	Actinobacteria	Actinobacteria	Frankiales	Acidothermaceae	Acidothermus	cast	0	0
																ASV1304	Actinobacteria	Thermoleophilia	Gaiellales	unclassified	unclassified	soil	0	0
																ASV1304	Actinobacteria	Thermoleophilia	Gaiellales	unclassified	unclassified	gut	6.75	4.73494
																ASV1304	Actinobacteria	Thermoleophilia	Gaiellales	unclassified	unclassified	cast	0	0
																ASV1331	Actinobacteria	Thermoleophilia	Gaiellales	unclassified	unclassified	soil	0	0
																ASV1331	Actinobacteria	Thermoleophilia	Gaiellales	unclassified	unclassified	gut	2.875	2.15006
																ASV1331	Actinobacteria	Thermoleophilia	Gaiellales	unclassified	unclassified	cast	1.5	1.5
																ASV1343	Actinobacteria	Actinobacteria	Frankiales	unclassified	unclassified	soil	0.368421	0.368421
																ASV1343	Actinobacteria	Actinobacteria	Frankiales	unclassified	unclassified	gut	5.25	5.25
																ASV1343	Actinobacteria	Actinobacteria	Frankiales	unclassified	unclassified	cast	0.15	0.15
																ASV1354	Actinobacteria	Thermoleophilia	Gaiellales	Gaiellaceae	Gaiella	soil	0	0
																ASV1354	Actinobacteria	Thermoleophilia	Gaiellales	Gaiellaceae	Gaiella	gut	6.5	4.73588
																ASV1354	Actinobacteria	Thermoleophilia	Gaiellales	Gaiellaceae	Gaiella	cast	0	0
																ASV136	Actinobacteria	Actinobacteria	Streptomycetales	Streptomycetaceae	Streptomyces	soil	1.57895	1.10902
																ASV136	Actinobacteria	Actinobacteria	Streptomycetales	Streptomycetaceae	Streptomyces	gut	28	9.39985
																ASV136	Actinobacteria	Actinobacteria	Streptomycetales	Streptomycetaceae	Streptomyces	cast	19.5	3.14517
																ASV1379	Actinobacteria	Actinobacteria	Propionibacteriales	Nocardioidaceae	Marmoricola	soil	0	0
																ASV1379	Actinobacteria	Actinobacteria	Propionibacteriales	Nocardioidaceae	Marmoricola	gut	2.75	1.81019
																ASV1379	Actinobacteria	Actinobacteria	Propionibacteriales	Nocardioidaceae	Marmoricola	cast	1.45	1.01431
																ASV1401	Actinobacteria	Actinobacteria	Frankiales	Acidothermaceae	Acidothermus	soil	0.631579	0.631579
																ASV1401	Actinobacteria	Actinobacteria	Frankiales	Acidothermaceae	Acidothermus	gut	4.75	4.75
																ASV1401	Actinobacteria	Actinobacteria	Frankiales	Acidothermaceae	Acidothermus	cast	0	0
																ASV1402	Actinobacteria	Acidimicrobiia	IMCC26256	unclassified	unclassified	soil	0.947368	0.719298
																ASV1402	Actinobacteria	Acidimicrobiia	IMCC26256	unclassified	unclassified	gut	4	4
																ASV1402	Actinobacteria	Acidimicrobiia	IMCC26256	unclassified	unclassified	cast	0	0
																ASV1416	Actinobacteria	Actinobacteria	Corynebacteriales	Nocardiaceae	Nocardia	soil	0	0
																ASV1416	Actinobacteria	Actinobacteria	Corynebacteriales	Nocardiaceae	Nocardia	gut	6.25	4.97763
																ASV1416	Actinobacteria	Actinobacteria	Corynebacteriales	Nocardiaceae	Nocardia	cast	0	0
																ASV1419	Actinobacteria	Acidimicrobiia	unclassified	unclassified	unclassified	soil	0	0
																ASV1419	Actinobacteria	Acidimicrobiia	unclassified	unclassified	unclassified	gut	6.25	3.49872
																ASV1419	Actinobacteria	Acidimicrobiia	unclassified	unclassified	unclassified	cast	0	0
																ASV1434	Actinobacteria	Thermoleophilia	Solirubrobacterales	Solirubrobacteraceae	Conexibacter	soil	0	0
																ASV1434	Actinobacteria	Thermoleophilia	Solirubrobacterales	Solirubrobacteraceae	Conexibacter	gut	2.375	2.375
																ASV1434	Actinobacteria	Thermoleophilia	Solirubrobacterales	Solirubrobacteraceae	Conexibacter	cast	1.5	1.09424
																ASV1437	Actinobacteria	Thermoleophilia	Gaiellales	unclassified	unclassified	soil	0	0
																ASV1437	Actinobacteria	Thermoleophilia	Gaiellales	unclassified	unclassified	gut	6.125	4.01087
																ASV1437	Actinobacteria	Thermoleophilia	Gaiellales	unclassified	unclassified	cast	0	0
																ASV1438	Actinobacteria	Thermoleophilia	Gaiellales	unclassified	unclassified	soil	0	0
																ASV1438	Actinobacteria	Thermoleophilia	Gaiellales	unclassified	unclassified	gut	5.125	3.35643
																ASV1438	Actinobacteria	Thermoleophilia	Gaiellales	unclassified	unclassified	cast	0.4	0.4
																ASV1456	Actinobacteria	Actinobacteria	Frankiales	unclassified	unclassified	soil	0	0
																ASV1456	Actinobacteria	Actinobacteria	Frankiales	unclassified	unclassified	gut	4	4
																ASV1456	Actinobacteria	Actinobacteria	Frankiales	unclassified	unclassified	cast	0.8	0.8
																ASV1458	Actinobacteria	Actinobacteria	Frankiales	unclassified	unclassified	soil	0	0
																ASV1458	Actinobacteria	Actinobacteria	Frankiales	unclassified	unclassified	gut	2.625	2.625
																ASV1458	Actinobacteria	Actinobacteria	Frankiales	unclassified	unclassified	cast	1.35	1.04195
																ASV1485	Actinobacteria	Thermoleophilia	Solirubrobacterales	Solirubrobacteraceae	unclassified	soil	0.789474	0.789474
																ASV1485	Actinobacteria	Thermoleophilia	Solirubrobacterales	Solirubrobacteraceae	unclassified	gut	4	3.02372
																ASV1485	Actinobacteria	Thermoleophilia	Solirubrobacterales	Solirubrobacteraceae	unclassified	cast	0	0
																ASV1486	Actinobacteria	Thermoleophilia	Gaiellales	Gaiellaceae	Gaiella	soil	0	0
																ASV1486	Actinobacteria	Thermoleophilia	Gaiellales	Gaiellaceae	Gaiella	gut	4.25	2.93835
																ASV1486	Actinobacteria	Thermoleophilia	Gaiellales	Gaiellaceae	Gaiella	cast	0.65	0.448829
																ASV1487	Actinobacteria	Actinobacteria	Pseudonocardiales	Pseudonocardiaceae	Pseudonocardia	soil	0	0
																ASV1487	Actinobacteria	Actinobacteria	Pseudonocardiales	Pseudonocardiaceae	Pseudonocardia	gut	4.125	4.125
																ASV1487	Actinobacteria	Actinobacteria	Pseudonocardiales	Pseudonocardiaceae	Pseudonocardia	cast	0.7	0.7
																ASV1503	Actinobacteria	Actinobacteria	Frankiales	Acidothermaceae	Acidothermus	soil	0.578947	0.578947
																ASV1503	Actinobacteria	Actinobacteria	Frankiales	Acidothermaceae	Acidothermus	gut	4.5	4.5
																ASV1503	Actinobacteria	Actinobacteria	Frankiales	Acidothermaceae	Acidothermus	cast	0	0
																ASV1506	Actinobacteria	Actinobacteria	Micromonosporales	Micromonosporaceae	unclassified	soil	1.05263	1.05263
																ASV1506	Actinobacteria	Actinobacteria	Micromonosporales	Micromonosporaceae	unclassified	gut	0	0
																ASV1506	Actinobacteria	Actinobacteria	Micromonosporales	Micromonosporaceae	unclassified	cast	1.35	1.35
																ASV1507	Actinobacteria	Thermoleophilia	Gaiellales	Gaiellaceae	Gaiella	soil	0	0
																ASV1507	Actinobacteria	Thermoleophilia	Gaiellales	Gaiellaceae	Gaiella	gut	4.5	4.5
																ASV1507	Actinobacteria	Thermoleophilia	Gaiellales	Gaiellaceae	Gaiella	cast	0.55	0.55
																ASV1521	Actinobacteria	Thermoleophilia	Gaiellales	unclassified	unclassified	soil	0	0
																ASV1521	Actinobacteria	Thermoleophilia	Gaiellales	unclassified	unclassified	gut	3.625	3.625
																ASV1521	Actinobacteria	Thermoleophilia	Gaiellales	unclassified	unclassified	cast	0.85	0.85
																ASV1524	Actinobacteria	Thermoleophilia	Gaiellales	unclassified	unclassified	soil	0	0
																ASV1524	Actinobacteria	Thermoleophilia	Gaiellales	unclassified	unclassified	gut	2.625	2.625
																ASV1524	Actinobacteria	Thermoleophilia	Gaiellales	unclassified	unclassified	cast	1.25	0.867164
																ASV1531	Actinobacteria	Thermoleophilia	Gaiellales	Gaiellaceae	Gaiella	soil	0.631579	0.631579
																ASV1531	Actinobacteria	Thermoleophilia	Gaiellales	Gaiellaceae	Gaiella	gut	4.25	4.25
																ASV1531	Actinobacteria	Thermoleophilia	Gaiellales	Gaiellaceae	Gaiella	cast	0	0
																ASV1536	Actinobacteria	Thermoleophilia	Gaiellales	unclassified	unclassified	soil	0	0
																ASV1536	Actinobacteria	Thermoleophilia	Gaiellales	unclassified	unclassified	gut	5.75	4.13068
																ASV1536	Actinobacteria	Thermoleophilia	Gaiellales	unclassified	unclassified	cast	0	0
																ASV1551	Actinobacteria	Thermoleophilia	Solirubrobacterales	67-14	unclassified	soil	0	0
																ASV1551	Actinobacteria	Thermoleophilia	Solirubrobacterales	67-14	unclassified	gut	5.625	3.69332
																ASV1551	Actinobacteria	Thermoleophilia	Solirubrobacterales	67-14	unclassified	cast	0	0
																ASV1554	Actinobacteria	Actinobacteria	Micromonosporales	Micromonosporaceae	unclassified	soil	0	0
																ASV1554	Actinobacteria	Actinobacteria	Micromonosporales	Micromonosporaceae	unclassified	gut	5.625	4.375
																ASV1554	Actinobacteria	Actinobacteria	Micromonosporales	Micromonosporaceae	unclassified	cast	0	0
																ASV1555	Actinobacteria	Actinobacteria	Corynebacteriales	Mycobacteriaceae	Mycobacterium	soil	0	0
																ASV1555	Actinobacteria	Actinobacteria	Corynebacteriales	Mycobacteriaceae	Mycobacterium	gut	2.875	2.875
																ASV1555	Actinobacteria	Actinobacteria	Corynebacteriales	Mycobacteriaceae	Mycobacterium	cast	1.1	1.1
																ASV1556	Actinobacteria	Acidimicrobiia	Microtrichales	unclassified	unclassified	soil	0	0
																ASV1556	Actinobacteria	Acidimicrobiia	Microtrichales	unclassified	unclassified	gut	3.125	2.06534
																ASV1556	Actinobacteria	Acidimicrobiia	Microtrichales	unclassified	unclassified	cast	1	1
																ASV1574	Actinobacteria	Thermoleophilia	Solirubrobacterales	Solirubrobacteraceae	Conexibacter	soil	0	0
																ASV1574	Actinobacteria	Thermoleophilia	Solirubrobacterales	Solirubrobacteraceae	Conexibacter	gut	5.625	3.88191
																ASV1574	Actinobacteria	Thermoleophilia	Solirubrobacterales	Solirubrobacteraceae	Conexibacter	cast	0	0
																ASV1601	Actinobacteria	Actinobacteria	Micrococcales	Intrasporangiaceae	unclassified	soil	0	0
																ASV1601	Actinobacteria	Actinobacteria	Micrococcales	Intrasporangiaceae	unclassified	gut	5.5	3.67909
																ASV1601	Actinobacteria	Actinobacteria	Micrococcales	Intrasporangiaceae	unclassified	cast	0	0
																ASV1612	Actinobacteria	Actinobacteria	Micromonosporales	Micromonosporaceae	unclassified	soil	2.31579	1.60783
																ASV1612	Actinobacteria	Actinobacteria	Micromonosporales	Micromonosporaceae	unclassified	gut	0	0
																ASV1612	Actinobacteria	Actinobacteria	Micromonosporales	Micromonosporaceae	unclassified	cast	0	0
																ASV1616	Actinobacteria	Actinobacteria	Micrococcales	Cellulomonadaceae	Cellulomonas	soil	0	0
																ASV1616	Actinobacteria	Actinobacteria	Micrococcales	Cellulomonadaceae	Cellulomonas	gut	0	0
																ASV1616	Actinobacteria	Actinobacteria	Micrococcales	Cellulomonadaceae	Cellulomonas	cast	2.15	1.50136
																ASV1618	Actinobacteria	Actinobacteria	Propionibacteriales	Nocardioidaceae	unclassified	soil	0	0
																ASV1618	Actinobacteria	Actinobacteria	Propionibacteriales	Nocardioidaceae	unclassified	gut	5.375	3.7935
																ASV1618	Actinobacteria	Actinobacteria	Propionibacteriales	Nocardioidaceae	unclassified	cast	0	0
																ASV1625	Actinobacteria	Thermoleophilia	Gaiellales	unclassified	unclassified	soil	0.894737	0.894737
																ASV1625	Actinobacteria	Thermoleophilia	Gaiellales	unclassified	unclassified	gut	3.25	2.16094
																ASV1625	Actinobacteria	Thermoleophilia	Gaiellales	unclassified	unclassified	cast	0	0
																ASV1627	Actinobacteria	Actinobacteria	Streptosporangiales	Thermomonosporaceae	unclassified	soil	0.526316	0.526316
																ASV1627	Actinobacteria	Actinobacteria	Streptosporangiales	Thermomonosporaceae	unclassified	gut	4.125	4.125
																ASV1627	Actinobacteria	Actinobacteria	Streptosporangiales	Thermomonosporaceae	unclassified	cast	0	0
																ASV1630	Actinobacteria	Acidimicrobiia	IMCC26256	unclassified	unclassified	soil	0	0
																ASV1630	Actinobacteria	Acidimicrobiia	IMCC26256	unclassified	unclassified	gut	5.375	3.62007
																ASV1630	Actinobacteria	Acidimicrobiia	IMCC26256	unclassified	unclassified	cast	0	0
																ASV1637	Actinobacteria	Actinobacteria	Pseudonocardiales	Pseudonocardiaceae	Crossiella	soil	1.63158	0.927836
																ASV1637	Actinobacteria	Actinobacteria	Pseudonocardiales	Pseudonocardiaceae	Crossiella	gut	1.5	1.5
																ASV1637	Actinobacteria	Actinobacteria	Pseudonocardiales	Pseudonocardiaceae	Crossiella	cast	0	0
																ASV164	Actinobacteria	Thermoleophilia	Solirubrobacterales	Solirubrobacteraceae	Conexibacter	soil	11.8947	5.50433
																ASV164	Actinobacteria	Thermoleophilia	Solirubrobacterales	Solirubrobacteraceae	Conexibacter	gut	21.25	8.38738
																ASV164	Actinobacteria	Thermoleophilia	Solirubrobacterales	Solirubrobacteraceae	Conexibacter	cast	8.1	3.7451
																ASV165	Actinobacteria	Actinobacteria	Corynebacteriales	Mycobacteriaceae	Mycobacterium	soil	2	1.15723
																ASV165	Actinobacteria	Actinobacteria	Corynebacteriales	Mycobacteriaceae	Mycobacterium	gut	13.5	6.83478
																ASV165	Actinobacteria	Actinobacteria	Corynebacteriales	Mycobacteriaceae	Mycobacterium	cast	20.5	4.65069
																ASV1679	Actinobacteria	Acidimicrobiia	Microtrichales	Ilumatobacteraceae	CL500-29_marine_group	soil	0.421053	0.421053
																ASV1679	Actinobacteria	Acidimicrobiia	Microtrichales	Ilumatobacteraceae	CL500-29_marine_group	gut	3.375	2.2594
																ASV1679	Actinobacteria	Acidimicrobiia	Microtrichales	Ilumatobacteraceae	CL500-29_marine_group	cast	0.35	0.35
																ASV1680	Actinobacteria	Thermoleophilia	Gaiellales	Gaiellaceae	Gaiella	soil	0	0
																ASV1680	Actinobacteria	Thermoleophilia	Gaiellales	Gaiellaceae	Gaiella	gut	5.25	3.75476
																ASV1680	Actinobacteria	Thermoleophilia	Gaiellales	Gaiellaceae	Gaiella	cast	0	0
																ASV1711	Actinobacteria	Thermoleophilia	Solirubrobacterales	Solirubrobacteraceae	Conexibacter	soil	0	0
																ASV1711	Actinobacteria	Thermoleophilia	Solirubrobacterales	Solirubrobacteraceae	Conexibacter	gut	5.125	3.3882
																ASV1711	Actinobacteria	Thermoleophilia	Solirubrobacterales	Solirubrobacteraceae	Conexibacter	cast	0	0
																ASV1719	Actinobacteria	Actinobacteria	Streptosporangiales	Thermomonosporaceae	Actinomadura	soil	0.421053	0.421053
																ASV1719	Actinobacteria	Actinobacteria	Streptosporangiales	Thermomonosporaceae	Actinomadura	gut	4.125	2.7021
																ASV1719	Actinobacteria	Actinobacteria	Streptosporangiales	Thermomonosporaceae	Actinomadura	cast	0	0
																ASV1747	Actinobacteria	Actinobacteria	Micromonosporales	Micromonosporaceae	Actinoplanes	soil	0	0
																ASV1747	Actinobacteria	Actinobacteria	Micromonosporales	Micromonosporaceae	Actinoplanes	gut	5	3.53048
																ASV1747	Actinobacteria	Actinobacteria	Micromonosporales	Micromonosporaceae	Actinoplanes	cast	0	0
																ASV1749	Actinobacteria	Actinobacteria	Micrococcales	Microbacteriaceae	unclassified	soil	0.789474	0.789474
																ASV1749	Actinobacteria	Actinobacteria	Micrococcales	Microbacteriaceae	unclassified	gut	3.125	3.125
																ASV1749	Actinobacteria	Actinobacteria	Micrococcales	Microbacteriaceae	unclassified	cast	0	0
																ASV1773	Actinobacteria	Acidimicrobiia	IMCC26256	unclassified	unclassified	soil	2.10526	0.966983
																ASV1773	Actinobacteria	Acidimicrobiia	IMCC26256	unclassified	unclassified	gut	0	0
																ASV1773	Actinobacteria	Acidimicrobiia	IMCC26256	unclassified	unclassified	cast	0	0
																ASV178	Actinobacteria	Actinobacteria	Corynebacteriales	Mycobacteriaceae	Mycobacterium	soil	8.57895	3.04769
																ASV178	Actinobacteria	Actinobacteria	Corynebacteriales	Mycobacteriaceae	Mycobacterium	gut	38	10.3441
																ASV178	Actinobacteria	Actinobacteria	Corynebacteriales	Mycobacteriaceae	Mycobacterium	cast	2.8	1.93934
																ASV1783	Actinobacteria	Thermoleophilia	Solirubrobacterales	67-14	unclassified	soil	0	0
																ASV1783	Actinobacteria	Thermoleophilia	Solirubrobacterales	67-14	unclassified	gut	3.25	3.25
																ASV1783	Actinobacteria	Thermoleophilia	Solirubrobacterales	67-14	unclassified	cast	0.65	0.65
																ASV1806	Actinobacteria	Actinobacteria	Streptomycetales	Streptomycetaceae	Streptomyces	soil	0	0
																ASV1806	Actinobacteria	Actinobacteria	Streptomycetales	Streptomycetaceae	Streptomyces	gut	4.875	3.75803
																ASV1806	Actinobacteria	Actinobacteria	Streptomycetales	Streptomycetaceae	Streptomyces	cast	0	0
																ASV1854	Actinobacteria	Acidimicrobiia	IMCC26256	unclassified	unclassified	soil	0.684211	0.684211
																ASV1854	Actinobacteria	Acidimicrobiia	IMCC26256	unclassified	unclassified	gut	0	0
																ASV1854	Actinobacteria	Acidimicrobiia	IMCC26256	unclassified	unclassified	cast	1.25	1.25
																ASV1873	Actinobacteria	Acidimicrobiia	Microtrichales	Microtrichaceae	unclassified	soil	0	0
																ASV1873	Actinobacteria	Acidimicrobiia	Microtrichales	Microtrichaceae	unclassified	gut	4.625	3.4275
																ASV1873	Actinobacteria	Acidimicrobiia	Microtrichales	Microtrichaceae	unclassified	cast	0	0
																ASV1913	Actinobacteria	Thermoleophilia	Gaiellales	unclassified	unclassified	soil	1.94737	1.34311
																ASV1913	Actinobacteria	Thermoleophilia	Gaiellales	unclassified	unclassified	gut	0	0
																ASV1913	Actinobacteria	Thermoleophilia	Gaiellales	unclassified	unclassified	cast	0	0
																ASV192	Actinobacteria	Actinobacteria	Micrococcales	Intrasporangiaceae	Terrabacter	soil	0.631579	0.631579
																ASV192	Actinobacteria	Actinobacteria	Micrococcales	Intrasporangiaceae	Terrabacter	gut	18.5	7.34847
																ASV192	Actinobacteria	Actinobacteria	Micrococcales	Intrasporangiaceae	Terrabacter	cast	16.2	3.75822
																ASV1953	Actinobacteria	Actinobacteria	Micromonosporales	Micromonosporaceae	Dactylosporangium	soil	0.526316	0.526316
																ASV1953	Actinobacteria	Actinobacteria	Micromonosporales	Micromonosporaceae	Dactylosporangium	gut	3.25	3.25
																ASV1953	Actinobacteria	Actinobacteria	Micromonosporales	Micromonosporaceae	Dactylosporangium	cast	0	0
																ASV1998	Actinobacteria	Thermoleophilia	Gaiellales	unclassified	unclassified	soil	0	0
																ASV1998	Actinobacteria	Thermoleophilia	Gaiellales	unclassified	unclassified	gut	4.375	3.83563
																ASV1998	Actinobacteria	Thermoleophilia	Gaiellales	unclassified	unclassified	cast	0	0
																ASV1999	Actinobacteria	Actinobacteria	Streptosporangiales	Thermomonosporaceae	Actinoallomurus	soil	0	0
																ASV1999	Actinobacteria	Actinobacteria	Streptosporangiales	Thermomonosporaceae	Actinoallomurus	gut	4.375	2.90282
																ASV1999	Actinobacteria	Actinobacteria	Streptosporangiales	Thermomonosporaceae	Actinoallomurus	cast	0	0
																ASV2003	Actinobacteria	Thermoleophilia	Gaiellales	Gaiellaceae	Gaiella	soil	0	0
																ASV2003	Actinobacteria	Thermoleophilia	Gaiellales	Gaiellaceae	Gaiella	gut	4.375	3.71261
																ASV2003	Actinobacteria	Thermoleophilia	Gaiellales	Gaiellaceae	Gaiella	cast	0	0
																ASV2030	Actinobacteria	Acidimicrobiia	Microtrichales	Iamiaceae	Iamia	soil	0.368421	0.368421
																ASV2030	Actinobacteria	Acidimicrobiia	Microtrichales	Iamiaceae	Iamia	gut	3.375	3.375
																ASV2030	Actinobacteria	Acidimicrobiia	Microtrichales	Iamiaceae	Iamia	cast	0	0
																ASV2073	Actinobacteria	Actinobacteria	Frankiales	unclassified	unclassified	soil	1.78947	1.2297
																ASV2073	Actinobacteria	Actinobacteria	Frankiales	unclassified	unclassified	gut	0	0
																ASV2073	Actinobacteria	Actinobacteria	Frankiales	unclassified	unclassified	cast	0	0
																ASV2079	Actinobacteria	Actinobacteria	Micrococcales	Demequinaceae	unclassified	soil	0	0
																ASV2079	Actinobacteria	Actinobacteria	Micrococcales	Demequinaceae	unclassified	gut	2.875	2.875
																ASV2079	Actinobacteria	Actinobacteria	Micrococcales	Demequinaceae	unclassified	cast	0.5	0.5
																ASV2081	Actinobacteria	Actinobacteria	Propionibacteriales	Nocardioidaceae	Kribbella	soil	0	0
																ASV2081	Actinobacteria	Actinobacteria	Propionibacteriales	Nocardioidaceae	Kribbella	gut	4.125	3.04981
																ASV2081	Actinobacteria	Actinobacteria	Propionibacteriales	Nocardioidaceae	Kribbella	cast	0	0
																ASV2086	Actinobacteria	Actinobacteria	Corynebacteriales	unclassified	unclassified	soil	0	0
																ASV2086	Actinobacteria	Actinobacteria	Corynebacteriales	unclassified	unclassified	gut	1.375	1.375
																ASV2086	Actinobacteria	Actinobacteria	Corynebacteriales	unclassified	unclassified	cast	1.1	1.1
																ASV210	Actinobacteria	Actinobacteria	Frankiales	Geodermatophilaceae	Blastococcus	soil	1.36842	0.952714
																ASV210	Actinobacteria	Actinobacteria	Frankiales	Geodermatophilaceae	Blastococcus	gut	34.5	9.82889
																ASV210	Actinobacteria	Actinobacteria	Frankiales	Geodermatophilaceae	Blastococcus	cast	6.95	2.23663
																ASV2135	Actinobacteria	Actinobacteria	Propionibacteriales	Nocardioidaceae	Nocardioides	soil	0	0
																ASV2135	Actinobacteria	Actinobacteria	Propionibacteriales	Nocardioidaceae	Nocardioides	gut	0	0
																ASV2135	Actinobacteria	Actinobacteria	Propionibacteriales	Nocardioidaceae	Nocardioides	cast	1.6	1.13879
																ASV2139	Actinobacteria	Thermoleophilia	Gaiellales	unclassified	unclassified	soil	0	0
																ASV2139	Actinobacteria	Thermoleophilia	Gaiellales	unclassified	unclassified	gut	3	3
																ASV2139	Actinobacteria	Thermoleophilia	Gaiellales	unclassified	unclassified	cast	0.4	0.4
																ASV2141	Actinobacteria	Thermoleophilia	Solirubrobacterales	Solirubrobacteraceae	unclassified	soil	0	0
																ASV2141	Actinobacteria	Thermoleophilia	Solirubrobacterales	Solirubrobacteraceae	unclassified	gut	4	3.02372
																ASV2141	Actinobacteria	Thermoleophilia	Solirubrobacterales	Solirubrobacteraceae	unclassified	cast	0	0
																ASV2155	Actinobacteria	Thermoleophilia	Gaiellales	unclassified	unclassified	soil	0	0
																ASV2155	Actinobacteria	Thermoleophilia	Gaiellales	unclassified	unclassified	gut	2.75	2.75
																ASV2155	Actinobacteria	Thermoleophilia	Gaiellales	unclassified	unclassified	cast	0.5	0.5
																ASV2178	Actinobacteria	Actinobacteria	Corynebacteriales	Mycobacteriaceae	Mycobacterium	soil	0	0
																ASV2178	Actinobacteria	Actinobacteria	Corynebacteriales	Mycobacteriaceae	Mycobacterium	gut	4	2.78388
																ASV2178	Actinobacteria	Actinobacteria	Corynebacteriales	Mycobacteriaceae	Mycobacterium	cast	0	0
																ASV2179	Actinobacteria	Actinobacteria	Pseudonocardiales	Pseudonocardiaceae	Kutzneria	soil	0.947368	0.690257
																ASV2179	Actinobacteria	Actinobacteria	Pseudonocardiales	Pseudonocardiaceae	Kutzneria	gut	1.75	1.20638
																ASV2179	Actinobacteria	Actinobacteria	Pseudonocardiales	Pseudonocardiaceae	Kutzneria	cast	0	0
																ASV2195	Actinobacteria	Actinobacteria	Frankiales	Acidothermaceae	Acidothermus	soil	1.68421	1.17988
																ASV2195	Actinobacteria	Actinobacteria	Frankiales	Acidothermaceae	Acidothermus	gut	0	0
																ASV2195	Actinobacteria	Actinobacteria	Frankiales	Acidothermaceae	Acidothermus	cast	0	0
																ASV2198	Actinobacteria	Actinobacteria	Streptomycetales	Streptomycetaceae	Streptomyces	soil	1.68421	1.15989
																ASV2198	Actinobacteria	Actinobacteria	Streptomycetales	Streptomycetaceae	Streptomyces	gut	0	0
																ASV2198	Actinobacteria	Actinobacteria	Streptomycetales	Streptomycetaceae	Streptomyces	cast	0	0
																ASV2214	Actinobacteria	Thermoleophilia	Gaiellales	unclassified	unclassified	soil	0	0
																ASV2214	Actinobacteria	Thermoleophilia	Gaiellales	unclassified	unclassified	gut	1.625	1.625
																ASV2214	Actinobacteria	Thermoleophilia	Gaiellales	unclassified	unclassified	cast	0.9	0.9
																ASV2221	Actinobacteria	Actinobacteria	Micromonosporales	Micromonosporaceae	unclassified	soil	0	0
																ASV2221	Actinobacteria	Actinobacteria	Micromonosporales	Micromonosporaceae	unclassified	gut	3.875	2.53854
																ASV2221	Actinobacteria	Actinobacteria	Micromonosporales	Micromonosporaceae	unclassified	cast	0	0
																ASV2222	Actinobacteria	Actinobacteria	Streptomycetales	Streptomycetaceae	Streptomyces	soil	0	0
																ASV2222	Actinobacteria	Actinobacteria	Streptomycetales	Streptomycetaceae	Streptomyces	gut	3.875	2.74146
																ASV2222	Actinobacteria	Actinobacteria	Streptomycetales	Streptomycetaceae	Streptomyces	cast	0	0
																ASV2245	Actinobacteria	Thermoleophilia	Solirubrobacterales	unclassified	unclassified	soil	0.947368	0.651017
																ASV2245	Actinobacteria	Thermoleophilia	Solirubrobacterales	unclassified	unclassified	gut	1.625	1.625
																ASV2245	Actinobacteria	Thermoleophilia	Solirubrobacterales	unclassified	unclassified	cast	0	0
																ASV225	Actinobacteria	Actinobacteria	Micrococcales	Micrococcaceae	unclassified	soil	2.31579	1.08162
																ASV225	Actinobacteria	Actinobacteria	Micrococcales	Micrococcaceae	unclassified	gut	37.375	17.1807
																ASV225	Actinobacteria	Actinobacteria	Micrococcales	Micrococcaceae	unclassified	cast	2.35	1.70645
																ASV2266	Actinobacteria	Actinobacteria	Micromonosporales	Micromonosporaceae	unclassified	soil	0	0
																ASV2266	Actinobacteria	Actinobacteria	Micromonosporales	Micromonosporaceae	unclassified	gut	3.75	2.63052
																ASV2266	Actinobacteria	Actinobacteria	Micromonosporales	Micromonosporaceae	unclassified	cast	0	0
																ASV2267	Actinobacteria	Actinobacteria	Frankiales	Acidothermaceae	Acidothermus	soil	0	0
																ASV2267	Actinobacteria	Actinobacteria	Frankiales	Acidothermaceae	Acidothermus	gut	3.75	2.63052
																ASV2267	Actinobacteria	Actinobacteria	Frankiales	Acidothermaceae	Acidothermus	cast	0	0
																ASV2284	Actinobacteria	Thermoleophilia	Gaiellales	unclassified	unclassified	soil	0	0
																ASV2284	Actinobacteria	Thermoleophilia	Gaiellales	unclassified	unclassified	gut	3.75	2.45495
																ASV2284	Actinobacteria	Thermoleophilia	Gaiellales	unclassified	unclassified	cast	0	0
																ASV2285	Actinobacteria	Actinobacteria	Streptosporangiales	Thermomonosporaceae	Actinomadura	soil	0	0
																ASV2285	Actinobacteria	Actinobacteria	Streptosporangiales	Thermomonosporaceae	Actinomadura	gut	3.75	2.51957
																ASV2285	Actinobacteria	Actinobacteria	Streptosporangiales	Thermomonosporaceae	Actinomadura	cast	0	0
																ASV2301	Actinobacteria	Actinobacteria	Corynebacteriales	Nocardiaceae	Nocardia	soil	0	0
																ASV2301	Actinobacteria	Actinobacteria	Corynebacteriales	Nocardiaceae	Nocardia	gut	3.75	2.98658
																ASV2301	Actinobacteria	Actinobacteria	Corynebacteriales	Nocardiaceae	Nocardia	cast	0	0
																ASV2302	Actinobacteria	Thermoleophilia	Solirubrobacterales	unclassified	unclassified	soil	0	0
																ASV2302	Actinobacteria	Thermoleophilia	Solirubrobacterales	unclassified	unclassified	gut	3.75	2.46221
																ASV2302	Actinobacteria	Thermoleophilia	Solirubrobacterales	unclassified	unclassified	cast	0	0
																ASV2303	Actinobacteria	Actinobacteria	Micrococcales	Microbacteriaceae	Amnibacterium	soil	1.05263	1.05263
																ASV2303	Actinobacteria	Actinobacteria	Micrococcales	Microbacteriaceae	Amnibacterium	gut	1.25	1.25
																ASV2303	Actinobacteria	Actinobacteria	Micrococcales	Microbacteriaceae	Amnibacterium	cast	0	0
																ASV231	Actinobacteria	Actinobacteria	Micromonosporales	Micromonosporaceae	unclassified	soil	15.9474	3.18023
																ASV231	Actinobacteria	Actinobacteria	Micromonosporales	Micromonosporaceae	unclassified	gut	8	3.62038
																ASV231	Actinobacteria	Actinobacteria	Micromonosporales	Micromonosporaceae	unclassified	cast	0.65	0.65
																ASV2327	Actinobacteria	Acidimicrobiia	unclassified	unclassified	unclassified	soil	0.894737	0.894737
																ASV2327	Actinobacteria	Acidimicrobiia	unclassified	unclassified	unclassified	gut	1.625	1.625
																ASV2327	Actinobacteria	Acidimicrobiia	unclassified	unclassified	unclassified	cast	0	0
																ASV2329	Actinobacteria	Thermoleophilia	Gaiellales	unclassified	unclassified	soil	1.57895	1.08503
																ASV2329	Actinobacteria	Thermoleophilia	Gaiellales	unclassified	unclassified	gut	0	0
																ASV2329	Actinobacteria	Thermoleophilia	Gaiellales	unclassified	unclassified	cast	0	0
																ASV2362	Actinobacteria	Thermoleophilia	Gaiellales	unclassified	unclassified	soil	0.157895	0.157895
																ASV2362	Actinobacteria	Thermoleophilia	Gaiellales	unclassified	unclassified	gut	3.25	3.25
																ASV2362	Actinobacteria	Thermoleophilia	Gaiellales	unclassified	unclassified	cast	0	0
																ASV2364	Actinobacteria	Actinobacteria	Pseudonocardiales	Pseudonocardiaceae	unclassified	soil	0.368421	0.368421
																ASV2364	Actinobacteria	Actinobacteria	Pseudonocardiales	Pseudonocardiaceae	unclassified	gut	2.75	2.23407
																ASV2364	Actinobacteria	Actinobacteria	Pseudonocardiales	Pseudonocardiaceae	unclassified	cast	0	0
																ASV239	Actinobacteria	Acidimicrobiia	IMCC26256	unclassified	unclassified	soil	1.47368	1.01269
																ASV239	Actinobacteria	Acidimicrobiia	IMCC26256	unclassified	unclassified	gut	19.25	8.79884
																ASV239	Actinobacteria	Acidimicrobiia	IMCC26256	unclassified	unclassified	cast	9.35	2.12909
																ASV240	Actinobacteria	Actinobacteria	Propionibacteriales	Nocardioidaceae	Nocardioides	soil	0.842105	0.578681
																ASV240	Actinobacteria	Actinobacteria	Propionibacteriales	Nocardioidaceae	Nocardioides	gut	36.375	12.9269
																ASV240	Actinobacteria	Actinobacteria	Propionibacteriales	Nocardioidaceae	Nocardioides	cast	3.05	1.00649
																ASV246	Actinobacteria	Actinobacteria	Frankiales	Acidothermaceae	Acidothermus	soil	5.05263	1.63205
																ASV246	Actinobacteria	Actinobacteria	Frankiales	Acidothermaceae	Acidothermus	gut	7.5	3.80789
																ASV246	Actinobacteria	Actinobacteria	Frankiales	Acidothermaceae	Acidothermus	cast	10.05	2.45322
																ASV2481	Actinobacteria	Acidimicrobiia	Microtrichales	Ilumatobacteraceae	unclassified	soil	0	0
																ASV2481	Actinobacteria	Acidimicrobiia	Microtrichales	Ilumatobacteraceae	unclassified	gut	3.375	2.36747
																ASV2481	Actinobacteria	Acidimicrobiia	Microtrichales	Ilumatobacteraceae	unclassified	cast	0	0
																ASV2492	Actinobacteria	Actinobacteria	Pseudonocardiales	Pseudonocardiaceae	Pseudonocardia	soil	0.421053	0.421053
																ASV2492	Actinobacteria	Actinobacteria	Pseudonocardiales	Pseudonocardiaceae	Pseudonocardia	gut	1.75	1.75
																ASV2492	Actinobacteria	Actinobacteria	Pseudonocardiales	Pseudonocardiaceae	Pseudonocardia	cast	0.25	0.25
																ASV2503	Actinobacteria	Actinobacteria	Frankiales	Acidothermaceae	Acidothermus	soil	0.526316	0.526316
																ASV2503	Actinobacteria	Actinobacteria	Frankiales	Acidothermaceae	Acidothermus	gut	0.75	0.75
																ASV2503	Actinobacteria	Actinobacteria	Frankiales	Acidothermaceae	Acidothermus	cast	0.55	0.55
																ASV2533	Actinobacteria	Thermoleophilia	Solirubrobacterales	Solirubrobacteraceae	unclassified	soil	0	0
																ASV2533	Actinobacteria	Thermoleophilia	Solirubrobacterales	Solirubrobacteraceae	unclassified	gut	2.25	2.25
																ASV2533	Actinobacteria	Thermoleophilia	Solirubrobacterales	Solirubrobacteraceae	unclassified	cast	0.45	0.45
																ASV2549	Actinobacteria	Actinobacteria	Streptomycetales	Streptomycetaceae	Streptomyces	soil	0	0
																ASV2549	Actinobacteria	Actinobacteria	Streptomycetales	Streptomycetaceae	Streptomyces	gut	1.5	1.5
																ASV2549	Actinobacteria	Actinobacteria	Streptomycetales	Streptomycetaceae	Streptomyces	cast	0.7	0.7
																ASV257	Actinobacteria	Thermoleophilia	Gaiellales	unclassified	unclassified	soil	12	2.84286
																ASV257	Actinobacteria	Thermoleophilia	Gaiellales	unclassified	unclassified	gut	14.875	10.169
																ASV257	Actinobacteria	Thermoleophilia	Gaiellales	unclassified	unclassified	cast	0	0
																ASV2607	Actinobacteria	Thermoleophilia	Gaiellales	unclassified	unclassified	soil	0.578947	0.578947
																ASV2607	Actinobacteria	Thermoleophilia	Gaiellales	unclassified	unclassified	gut	1.875	1.875
																ASV2607	Actinobacteria	Thermoleophilia	Gaiellales	unclassified	unclassified	cast	0	0
																ASV261	Actinobacteria	Acidimicrobiia	Acidimicrobiales	Acidimicrobiaceae	unclassified	soil	12.4211	2.66701
																ASV261	Actinobacteria	Acidimicrobiia	Acidimicrobiales	Acidimicrobiaceae	unclassified	gut	11.5	5.98808
																ASV261	Actinobacteria	Acidimicrobiia	Acidimicrobiales	Acidimicrobiaceae	unclassified	cast	0.75	0.75
																ASV263	Actinobacteria	Acidimicrobiia	IMCC26256	unclassified	unclassified	soil	2.05263	1.14062
																ASV263	Actinobacteria	Acidimicrobiia	IMCC26256	unclassified	unclassified	gut	16.375	6.46401
																ASV263	Actinobacteria	Acidimicrobiia	IMCC26256	unclassified	unclassified	cast	8.6	2.47237
																ASV2636	Actinobacteria	Thermoleophilia	Solirubrobacterales	Solirubrobacteraceae	Conexibacter	soil	0	0
																ASV2636	Actinobacteria	Thermoleophilia	Solirubrobacterales	Solirubrobacteraceae	Conexibacter	gut	1.375	1.375
																ASV2636	Actinobacteria	Thermoleophilia	Solirubrobacterales	Solirubrobacteraceae	Conexibacter	cast	0.7	0.7
																ASV2651	Actinobacteria	Actinobacteria	Streptosporangiales	Thermomonosporaceae	Actinoallomurus	soil	0	0
																ASV2651	Actinobacteria	Actinobacteria	Streptosporangiales	Thermomonosporaceae	Actinoallomurus	gut	1.625	1.16401
																ASV2651	Actinobacteria	Actinobacteria	Streptosporangiales	Thermomonosporaceae	Actinoallomurus	cast	0.6	0.6
																ASV2683	Actinobacteria	Thermoleophilia	Gaiellales	unclassified	unclassified	soil	0.789474	0.789474
																ASV2683	Actinobacteria	Thermoleophilia	Gaiellales	unclassified	unclassified	gut	0	0
																ASV2683	Actinobacteria	Thermoleophilia	Gaiellales	unclassified	unclassified	cast	0.5	0.5
																ASV2729	Actinobacteria	Thermoleophilia	Solirubrobacterales	67-14	unclassified	soil	0	0
																ASV2729	Actinobacteria	Thermoleophilia	Solirubrobacterales	67-14	unclassified	gut	2.25	2.25
																ASV2729	Actinobacteria	Thermoleophilia	Solirubrobacterales	67-14	unclassified	cast	0.3	0.3
																ASV2739	Actinobacteria	Actinobacteria	Frankiales	Acidothermaceae	Acidothermus	soil	0	0
																ASV2739	Actinobacteria	Actinobacteria	Frankiales	Acidothermaceae	Acidothermus	gut	3	1.97303
																ASV2739	Actinobacteria	Actinobacteria	Frankiales	Acidothermaceae	Acidothermus	cast	0	0
																ASV2753	Actinobacteria	Actinobacteria	Micrococcales	Microbacteriaceae	unclassified	soil	0	0
																ASV2753	Actinobacteria	Actinobacteria	Micrococcales	Microbacteriaceae	unclassified	gut	1.125	1.125
																ASV2753	Actinobacteria	Actinobacteria	Micrococcales	Microbacteriaceae	unclassified	cast	0.75	0.75
																ASV2785	Actinobacteria	Actinobacteria	Streptosporangiales	Thermomonosporaceae	unclassified	soil	0.473684	0.473684
																ASV2785	Actinobacteria	Actinobacteria	Streptosporangiales	Thermomonosporaceae	unclassified	gut	1.875	1.875
																ASV2785	Actinobacteria	Actinobacteria	Streptosporangiales	Thermomonosporaceae	unclassified	cast	0	0
																ASV280	Actinobacteria	Actinobacteria	Frankiales	unclassified	unclassified	soil	6.42105	2.01357
																ASV280	Actinobacteria	Actinobacteria	Frankiales	unclassified	unclassified	gut	24.5	7.78506
																ASV280	Actinobacteria	Actinobacteria	Frankiales	unclassified	unclassified	cast	0.4	0.4
																ASV2805	Actinobacteria	Thermoleophilia	Gaiellales	unclassified	unclassified	soil	0	0
																ASV2805	Actinobacteria	Thermoleophilia	Gaiellales	unclassified	unclassified	gut	2.875	1.8845
																ASV2805	Actinobacteria	Thermoleophilia	Gaiellales	unclassified	unclassified	cast	0	0
																ASV281	Actinobacteria	Thermoleophilia	Solirubrobacterales	Solirubrobacteraceae	unclassified	soil	0.894737	0.894737
																ASV281	Actinobacteria	Thermoleophilia	Solirubrobacterales	Solirubrobacteraceae	unclassified	gut	38.375	16.8766
																ASV281	Actinobacteria	Thermoleophilia	Solirubrobacterales	Solirubrobacteraceae	unclassified	cast	0	0
																ASV285	Actinobacteria	Actinobacteria	Pseudonocardiales	Pseudonocardiaceae	Pseudonocardia	soil	3.89474	1.79488
																ASV285	Actinobacteria	Actinobacteria	Pseudonocardiales	Pseudonocardiaceae	Pseudonocardia	gut	10.375	5.61865
																ASV285	Actinobacteria	Actinobacteria	Pseudonocardiales	Pseudonocardiaceae	Pseudonocardia	cast	7.95	2.51048
																ASV286	Actinobacteria	Actinobacteria	Streptomycetales	Streptomycetaceae	Kitasatospora	soil	0.263158	0.263158
																ASV286	Actinobacteria	Actinobacteria	Streptomycetales	Streptomycetaceae	Kitasatospora	gut	1.875	1.875
																ASV286	Actinobacteria	Actinobacteria	Streptomycetales	Streptomycetaceae	Kitasatospora	cast	14.8	3.72587
																ASV2912	Actinobacteria	Actinobacteria	Micromonosporales	Micromonosporaceae	Planosporangium	soil	0	0
																ASV2912	Actinobacteria	Actinobacteria	Micromonosporales	Micromonosporaceae	Planosporangium	gut	1.375	1.375
																ASV2912	Actinobacteria	Actinobacteria	Micromonosporales	Micromonosporaceae	Planosporangium	cast	0.55	0.55
																ASV2913	Actinobacteria	Thermoleophilia	Gaiellales	unclassified	unclassified	soil	0	0
																ASV2913	Actinobacteria	Thermoleophilia	Gaiellales	unclassified	unclassified	gut	2.75	1.95256
																ASV2913	Actinobacteria	Thermoleophilia	Gaiellales	unclassified	unclassified	cast	0	0
																ASV300	Actinobacteria	Actinobacteria	Corynebacteriales	Mycobacteriaceae	Mycobacterium	soil	9.15789	2.39305
																ASV300	Actinobacteria	Actinobacteria	Corynebacteriales	Mycobacteriaceae	Mycobacterium	gut	9.75	5.51216
																ASV300	Actinobacteria	Actinobacteria	Corynebacteriales	Mycobacteriaceae	Mycobacterium	cast	2.3	0.976298
																ASV31	Actinobacteria	Thermoleophilia	Solirubrobacterales	Solirubrobacteraceae	Conexibacter	soil	65.5789	7.72303
																ASV31	Actinobacteria	Thermoleophilia	Solirubrobacterales	Solirubrobacteraceae	Conexibacter	gut	58.25	14.9281
																ASV31	Actinobacteria	Thermoleophilia	Solirubrobacterales	Solirubrobacteraceae	Conexibacter	cast	15.3	5.88177
																ASV3135	Actinobacteria	Thermoleophilia	Gaiellales	Gaiellaceae	Gaiella	soil	0	0
																ASV3135	Actinobacteria	Thermoleophilia	Gaiellales	Gaiellaceae	Gaiella	gut	0	0
																ASV3135	Actinobacteria	Thermoleophilia	Gaiellales	Gaiellaceae	Gaiella	cast	1	0.688247
																ASV3140	Actinobacteria	Actinobacteria	Micromonosporales	Micromonosporaceae	Hamadaea	soil	0	0
																ASV3140	Actinobacteria	Actinobacteria	Micromonosporales	Micromonosporaceae	Hamadaea	gut	0	0
																ASV3140	Actinobacteria	Actinobacteria	Micromonosporales	Micromonosporaceae	Hamadaea	cast	1	0.777987
																ASV3141	Actinobacteria	Thermoleophilia	Solirubrobacterales	Solirubrobacteraceae	Patulibacter	soil	0	0
																ASV3141	Actinobacteria	Thermoleophilia	Solirubrobacterales	Solirubrobacteraceae	Patulibacter	gut	1.625	1.625
																ASV3141	Actinobacteria	Thermoleophilia	Solirubrobacterales	Solirubrobacteraceae	Patulibacter	cast	0.35	0.35
																ASV3162	Actinobacteria	Acidimicrobiia	unclassified	unclassified	unclassified	soil	0	0
																ASV3162	Actinobacteria	Acidimicrobiia	unclassified	unclassified	unclassified	gut	1.25	1.25
																ASV3162	Actinobacteria	Acidimicrobiia	unclassified	unclassified	unclassified	cast	0.5	0.5
																ASV3164	Actinobacteria	Thermoleophilia	Solirubrobacterales	Solirubrobacteraceae	Conexibacter	soil	0	0
																ASV3164	Actinobacteria	Thermoleophilia	Solirubrobacterales	Solirubrobacteraceae	Conexibacter	gut	0	0
																ASV3164	Actinobacteria	Thermoleophilia	Solirubrobacterales	Solirubrobacteraceae	Conexibacter	cast	1	0.69206
																ASV319	Actinobacteria	Thermoleophilia	Solirubrobacterales	Solirubrobacteraceae	Conexibacter	soil	8.15789	2.03229
																ASV319	Actinobacteria	Thermoleophilia	Solirubrobacterales	Solirubrobacteraceae	Conexibacter	gut	1.5	1.5
																ASV319	Actinobacteria	Thermoleophilia	Solirubrobacterales	Solirubrobacteraceae	Conexibacter	cast	5.9	1.90691
																ASV321	Actinobacteria	Thermoleophilia	Solirubrobacterales	Solirubrobacteraceae	Conexibacter	soil	0	0
																ASV321	Actinobacteria	Thermoleophilia	Solirubrobacterales	Solirubrobacteraceae	Conexibacter	gut	18.875	10.4119
																ASV321	Actinobacteria	Thermoleophilia	Solirubrobacterales	Solirubrobacteraceae	Conexibacter	cast	6.55	3.13089
																ASV326	Actinobacteria	Acidimicrobiia	Microtrichales	unclassified	unclassified	soil	11.5263	2.65829
																ASV326	Actinobacteria	Acidimicrobiia	Microtrichales	unclassified	unclassified	gut	7.5	5
																ASV326	Actinobacteria	Acidimicrobiia	Microtrichales	unclassified	unclassified	cast	0	0
																ASV3262	Actinobacteria	Actinobacteria	Pseudonocardiales	Pseudonocardiaceae	Pseudonocardia	soil	0	0
																ASV3262	Actinobacteria	Actinobacteria	Pseudonocardiales	Pseudonocardiaceae	Pseudonocardia	gut	2.375	1.625
																ASV3262	Actinobacteria	Actinobacteria	Pseudonocardiales	Pseudonocardiaceae	Pseudonocardia	cast	0	0
																ASV327	Actinobacteria	Acidimicrobiia	Microtrichales	unclassified	unclassified	soil	6.10526	2.53155
																ASV327	Actinobacteria	Acidimicrobiia	Microtrichales	unclassified	unclassified	gut	11.125	4.50174
																ASV327	Actinobacteria	Acidimicrobiia	Microtrichales	unclassified	unclassified	cast	3.65	2.14141
																ASV33	Actinobacteria	Thermoleophilia	Solirubrobacterales	Solirubrobacteraceae	unclassified	soil	51.0526	2.58592
																ASV33	Actinobacteria	Thermoleophilia	Solirubrobacterales	Solirubrobacteraceae	unclassified	gut	81.5	29.8753
																ASV33	Actinobacteria	Thermoleophilia	Solirubrobacterales	Solirubrobacteraceae	unclassified	cast	16.65	3.72846
																ASV3303	Actinobacteria	Acidimicrobiia	Microtrichales	Ilumatobacteraceae	unclassified	soil	0	0
																ASV3303	Actinobacteria	Acidimicrobiia	Microtrichales	Ilumatobacteraceae	unclassified	gut	0	0
																ASV3303	Actinobacteria	Acidimicrobiia	Microtrichales	Ilumatobacteraceae	unclassified	cast	0.95	0.662829
																ASV332	Actinobacteria	Thermoleophilia	Solirubrobacterales	Solirubrobacteraceae	Conexibacter	soil	5.21053	1.90502
																ASV332	Actinobacteria	Thermoleophilia	Solirubrobacterales	Solirubrobacteraceae	Conexibacter	gut	14.625	8.1129
																ASV332	Actinobacteria	Thermoleophilia	Solirubrobacterales	Solirubrobacteraceae	Conexibacter	cast	2.9	1.6188
																ASV3372	Actinobacteria	Actinobacteria	Frankiales	unclassified	unclassified	soil	0	0
																ASV3372	Actinobacteria	Actinobacteria	Frankiales	unclassified	unclassified	gut	1.5	1.5
																ASV3372	Actinobacteria	Actinobacteria	Frankiales	unclassified	unclassified	cast	0.3	0.3
																ASV3385	Actinobacteria	Acidimicrobiia	IMCC26256	unclassified	unclassified	soil	0	0
																ASV3385	Actinobacteria	Acidimicrobiia	IMCC26256	unclassified	unclassified	gut	1.25	1.25
																ASV3385	Actinobacteria	Acidimicrobiia	IMCC26256	unclassified	unclassified	cast	0.4	0.4
																ASV3386	Actinobacteria	Thermoleophilia	Solirubrobacterales	Solirubrobacteraceae	unclassified	soil	0.421053	0.421053
																ASV3386	Actinobacteria	Thermoleophilia	Solirubrobacterales	Solirubrobacteraceae	unclassified	gut	1.25	1.11403
																ASV3386	Actinobacteria	Thermoleophilia	Solirubrobacterales	Solirubrobacteraceae	unclassified	cast	0	0
																ASV339	Actinobacteria	Thermoleophilia	Gaiellales	unclassified	unclassified	soil	0	0
																ASV339	Actinobacteria	Thermoleophilia	Gaiellales	unclassified	unclassified	gut	14.375	7.67635
																ASV339	Actinobacteria	Thermoleophilia	Gaiellales	unclassified	unclassified	cast	7.65	2.87116
																ASV3405	Actinobacteria	Acidimicrobiia	unclassified	unclassified	unclassified	soil	0	0
																ASV3405	Actinobacteria	Acidimicrobiia	unclassified	unclassified	unclassified	gut	1.625	1.625
																ASV3405	Actinobacteria	Acidimicrobiia	unclassified	unclassified	unclassified	cast	0.25	0.25
																ASV342	Actinobacteria	Thermoleophilia	Gaiellales	unclassified	unclassified	soil	4	1.69278
																ASV342	Actinobacteria	Thermoleophilia	Gaiellales	unclassified	unclassified	gut	12.5	6.72416
																ASV342	Actinobacteria	Thermoleophilia	Gaiellales	unclassified	unclassified	cast	4.55	2.08437
																ASV3439	Actinobacteria	Thermoleophilia	Solirubrobacterales	67-14	unclassified	soil	0	0
																ASV3439	Actinobacteria	Thermoleophilia	Solirubrobacterales	67-14	unclassified	gut	0.5	0.5
																ASV3439	Actinobacteria	Thermoleophilia	Solirubrobacterales	67-14	unclassified	cast	0.7	0.7
																ASV344	Actinobacteria	Actinobacteria	Streptomycetales	Streptomycetaceae	Streptomyces	soil	8.68421	2.6447
																ASV344	Actinobacteria	Actinobacteria	Streptomycetales	Streptomycetaceae	Streptomyces	gut	4.125	4.125
																ASV344	Actinobacteria	Actinobacteria	Streptomycetales	Streptomycetaceae	Streptomyces	cast	3.4	3.4
																ASV3504	Actinobacteria	Actinobacteria	Frankiales	Acidothermaceae	Acidothermus	soil	0.526316	0.526316
																ASV3504	Actinobacteria	Actinobacteria	Frankiales	Acidothermaceae	Acidothermus	gut	0.875	0.875
																ASV3504	Actinobacteria	Actinobacteria	Frankiales	Acidothermaceae	Acidothermus	cast	0	0
																ASV351	Actinobacteria	Thermoleophilia	Gaiellales	unclassified	unclassified	soil	1.89474	1.89474
																ASV351	Actinobacteria	Thermoleophilia	Gaiellales	unclassified	unclassified	gut	22.25	8.81101
																ASV351	Actinobacteria	Thermoleophilia	Gaiellales	unclassified	unclassified	cast	2.45	1.82162
																ASV356	Actinobacteria	Actinobacteria	Frankiales	Nakamurellaceae	Nakamurella	soil	0	0
																ASV356	Actinobacteria	Actinobacteria	Frankiales	Nakamurellaceae	Nakamurella	gut	6.375	4.25918
																ASV356	Actinobacteria	Actinobacteria	Frankiales	Nakamurellaceae	Nakamurella	cast	10.45	3.00743
																ASV358	Actinobacteria	Thermoleophilia	Gaiellales	unclassified	unclassified	soil	2.31579	1.37235
																ASV358	Actinobacteria	Thermoleophilia	Gaiellales	unclassified	unclassified	gut	26.75	14.7488
																ASV358	Actinobacteria	Thermoleophilia	Gaiellales	unclassified	unclassified	cast	0	0
																ASV3645	Actinobacteria	Actinobacteria	Micromonosporales	Micromonosporaceae	unclassified	soil	0	0
																ASV3645	Actinobacteria	Actinobacteria	Micromonosporales	Micromonosporaceae	unclassified	gut	2	1.32288
																ASV3645	Actinobacteria	Actinobacteria	Micromonosporales	Micromonosporaceae	unclassified	cast	0	0
																ASV3675	Actinobacteria	Thermoleophilia	Gaiellales	unclassified	unclassified	soil	0	0
																ASV3675	Actinobacteria	Thermoleophilia	Gaiellales	unclassified	unclassified	gut	2	1.42678
																ASV3675	Actinobacteria	Thermoleophilia	Gaiellales	unclassified	unclassified	cast	0	0
																ASV368	Actinobacteria	Acidimicrobiia	Microtrichales	Iamiaceae	Iamia	soil	1.73684	1.19903
																ASV368	Actinobacteria	Acidimicrobiia	Microtrichales	Iamiaceae	Iamia	gut	14.625	4.9962
																ASV368	Actinobacteria	Acidimicrobiia	Microtrichales	Iamiaceae	Iamia	cast	5.15	2.25747
																ASV3754	Actinobacteria	Acidimicrobiia	unclassified	unclassified	unclassified	soil	0.842105	0.583712
																ASV3754	Actinobacteria	Acidimicrobiia	unclassified	unclassified	unclassified	gut	0	0
																ASV3754	Actinobacteria	Acidimicrobiia	unclassified	unclassified	unclassified	cast	0	0
																ASV3798	Actinobacteria	Thermoleophilia	Gaiellales	unclassified	unclassified	soil	0	0
																ASV3798	Actinobacteria	Thermoleophilia	Gaiellales	unclassified	unclassified	gut	1.375	1.375
																ASV3798	Actinobacteria	Thermoleophilia	Gaiellales	unclassified	unclassified	cast	0.2	0.2
																ASV3963	Actinobacteria	Actinobacteria	Micromonosporales	Micromonosporaceae	Luedemannella	soil	0	0
																ASV3963	Actinobacteria	Actinobacteria	Micromonosporales	Micromonosporaceae	Luedemannella	gut	1.75	1.16113
																ASV3963	Actinobacteria	Actinobacteria	Micromonosporales	Micromonosporaceae	Luedemannella	cast	0	0
																ASV400	Actinobacteria	Acidimicrobiia	Acidimicrobiales	Acidimicrobiaceae	unclassified	soil	5.84211	2.37588
																ASV400	Actinobacteria	Acidimicrobiia	Acidimicrobiales	Acidimicrobiaceae	unclassified	gut	8.25	4.64739
																ASV400	Actinobacteria	Acidimicrobiia	Acidimicrobiales	Acidimicrobiaceae	unclassified	cast	2.65	1.38464
																ASV4022	Actinobacteria	Actinobacteria	Corynebacteriales	Mycobacteriaceae	Mycobacterium	soil	0.263158	0.263158
																ASV4022	Actinobacteria	Actinobacteria	Corynebacteriales	Mycobacteriaceae	Mycobacterium	gut	0	0
																ASV4022	Actinobacteria	Actinobacteria	Corynebacteriales	Mycobacteriaceae	Mycobacterium	cast	0.45	0.45
																ASV403	Actinobacteria	Actinobacteria	Pseudonocardiales	Pseudonocardiaceae	unclassified	soil	6.42105	2.25471
																ASV403	Actinobacteria	Actinobacteria	Pseudonocardiales	Pseudonocardiaceae	unclassified	gut	1.625	1.34878
																ASV403	Actinobacteria	Actinobacteria	Pseudonocardiales	Pseudonocardiaceae	unclassified	cast	4.65	1.77152
																ASV407	Actinobacteria	Thermoleophilia	Gaiellales	unclassified	unclassified	soil	2.42105	2.42105
																ASV407	Actinobacteria	Thermoleophilia	Gaiellales	unclassified	unclassified	gut	6.75	4.96685
																ASV407	Actinobacteria	Thermoleophilia	Gaiellales	unclassified	unclassified	cast	6.15	3.41689
																ASV4094	Actinobacteria	Acidimicrobiia	Acidimicrobiales	Acidimicrobiaceae	unclassified	soil	0	0
																ASV4094	Actinobacteria	Acidimicrobiia	Acidimicrobiales	Acidimicrobiaceae	unclassified	gut	0	0
																ASV4094	Actinobacteria	Acidimicrobiia	Acidimicrobiales	Acidimicrobiaceae	unclassified	cast	0.65	0.460406
																ASV415	Actinobacteria	Thermoleophilia	Gaiellales	unclassified	unclassified	soil	1.89474	1.35701
																ASV415	Actinobacteria	Thermoleophilia	Gaiellales	unclassified	unclassified	gut	19.625	10.3939
																ASV415	Actinobacteria	Thermoleophilia	Gaiellales	unclassified	unclassified	cast	1.05	1.05
																ASV417	Actinobacteria	Thermoleophilia	Gaiellales	Gaiellaceae	Gaiella	soil	5.05263	1.04426
																ASV417	Actinobacteria	Thermoleophilia	Gaiellales	Gaiellaceae	Gaiella	gut	14.25	10.373
																ASV417	Actinobacteria	Thermoleophilia	Gaiellales	Gaiellaceae	Gaiella	cast	0.2	0.2
																ASV4190	Actinobacteria	Thermoleophilia	Gaiellales	unclassified	unclassified	soil	0	0
																ASV4190	Actinobacteria	Thermoleophilia	Gaiellales	unclassified	unclassified	gut	1.625	1.10093
																ASV4190	Actinobacteria	Thermoleophilia	Gaiellales	unclassified	unclassified	cast	0	0
																ASV421	Actinobacteria	Actinobacteria	Micrococcales	Intrasporangiaceae	unclassified	soil	0.578947	0.578947
																ASV421	Actinobacteria	Actinobacteria	Micrococcales	Intrasporangiaceae	unclassified	gut	7	4.7697
																ASV421	Actinobacteria	Actinobacteria	Micrococcales	Intrasporangiaceae	unclassified	cast	7.2	2.40351
																ASV423	Actinobacteria	Thermoleophilia	Solirubrobacterales	Solirubrobacteraceae	unclassified	soil	2.52632	1.38996
																ASV423	Actinobacteria	Thermoleophilia	Solirubrobacterales	Solirubrobacteraceae	unclassified	gut	18.5	10.4762
																ASV423	Actinobacteria	Thermoleophilia	Solirubrobacterales	Solirubrobacteraceae	unclassified	cast	0	0
																ASV426	Actinobacteria	Thermoleophilia	Gaiellales	unclassified	unclassified	soil	2.15789	1.3361
																ASV426	Actinobacteria	Thermoleophilia	Gaiellales	unclassified	unclassified	gut	10.75	7.6058
																ASV426	Actinobacteria	Thermoleophilia	Gaiellales	unclassified	unclassified	cast	4.1	1.32168
																ASV433	Actinobacteria	Acidimicrobiia	IMCC26256	unclassified	unclassified	soil	1.89474	1.30428
																ASV433	Actinobacteria	Acidimicrobiia	IMCC26256	unclassified	unclassified	gut	21.125	9.95784
																ASV433	Actinobacteria	Acidimicrobiia	IMCC26256	unclassified	unclassified	cast	0	0
																ASV440	Actinobacteria	Thermoleophilia	Solirubrobacterales	67-14	unclassified	soil	0	0
																ASV440	Actinobacteria	Thermoleophilia	Solirubrobacterales	67-14	unclassified	gut	25.25	14.2462
																ASV440	Actinobacteria	Thermoleophilia	Solirubrobacterales	67-14	unclassified	cast	0	0
																ASV441	Actinobacteria	Thermoleophilia	Gaiellales	unclassified	unclassified	soil	0	0
																ASV441	Actinobacteria	Thermoleophilia	Gaiellales	unclassified	unclassified	gut	23.25	10.7251
																ASV441	Actinobacteria	Thermoleophilia	Gaiellales	unclassified	unclassified	cast	0.8	0.8
																ASV445	Actinobacteria	Thermoleophilia	Solirubrobacterales	Solirubrobacteraceae	unclassified	soil	0	0
																ASV445	Actinobacteria	Thermoleophilia	Solirubrobacterales	Solirubrobacteraceae	unclassified	gut	14.375	7.49747
																ASV445	Actinobacteria	Thermoleophilia	Solirubrobacterales	Solirubrobacteraceae	unclassified	cast	4.1	2.82554
																ASV4501	Actinobacteria	Thermoleophilia	Gaiellales	unclassified	unclassified	soil	0	0
																ASV4501	Actinobacteria	Thermoleophilia	Gaiellales	unclassified	unclassified	gut	0.5	0.5
																ASV4501	Actinobacteria	Thermoleophilia	Gaiellales	unclassified	unclassified	cast	0.35	0.35
																ASV463	Actinobacteria	Thermoleophilia	Solirubrobacterales	67-14	unclassified	soil	0	0
																ASV463	Actinobacteria	Thermoleophilia	Solirubrobacterales	67-14	unclassified	gut	23.625	20.1689
																ASV463	Actinobacteria	Thermoleophilia	Solirubrobacterales	67-14	unclassified	cast	0	0
																ASV465	Actinobacteria	Thermoleophilia	Gaiellales	unclassified	unclassified	soil	2	0.945905
																ASV465	Actinobacteria	Thermoleophilia	Gaiellales	unclassified	unclassified	gut	14.625	9.16698
																ASV465	Actinobacteria	Thermoleophilia	Gaiellales	unclassified	unclassified	cast	1.55	0.850619
																ASV468	Actinobacteria	Thermoleophilia	Gaiellales	unclassified	unclassified	soil	7.68421	3.13073
																ASV468	Actinobacteria	Thermoleophilia	Gaiellales	unclassified	unclassified	gut	4.875	3.41968
																ASV468	Actinobacteria	Thermoleophilia	Gaiellales	unclassified	unclassified	cast	0	0
																ASV470	Actinobacteria	Thermoleophilia	Gaiellales	unclassified	unclassified	soil	5.05263	3.92732
																ASV470	Actinobacteria	Thermoleophilia	Gaiellales	unclassified	unclassified	gut	11	6.09742
																ASV470	Actinobacteria	Thermoleophilia	Gaiellales	unclassified	unclassified	cast	0	0
																ASV478	Actinobacteria	Thermoleophilia	Gaiellales	unclassified	unclassified	soil	4.36842	2.05937
																ASV478	Actinobacteria	Thermoleophilia	Gaiellales	unclassified	unclassified	gut	9.75	6.98404
																ASV478	Actinobacteria	Thermoleophilia	Gaiellales	unclassified	unclassified	cast	1	1
																ASV481	Actinobacteria	Thermoleophilia	Gaiellales	unclassified	unclassified	soil	1.73684	1.19903
																ASV481	Actinobacteria	Thermoleophilia	Gaiellales	unclassified	unclassified	gut	17.125	9.74943
																ASV481	Actinobacteria	Thermoleophilia	Gaiellales	unclassified	unclassified	cast	0.5	0.5
																ASV488	Actinobacteria	Actinobacteria	Micrococcales	Microbacteriaceae	Galbitalea	soil	0.631579	0.631579
																ASV488	Actinobacteria	Actinobacteria	Micrococcales	Microbacteriaceae	Galbitalea	gut	4.375	2.93949
																ASV488	Actinobacteria	Actinobacteria	Micrococcales	Microbacteriaceae	Galbitalea	cast	6.4	2.28772
																ASV492	Actinobacteria	Actinobacteria	Micrococcales	Intrasporangiaceae	Oryzihumus	soil	1.15789	0.852458
																ASV492	Actinobacteria	Actinobacteria	Micrococcales	Intrasporangiaceae	Oryzihumus	gut	9.625	5.4246
																ASV492	Actinobacteria	Actinobacteria	Micrococcales	Intrasporangiaceae	Oryzihumus	cast	3.7	1.11709
																ASV495	Actinobacteria	Acidimicrobiia	Microtrichales	unclassified	unclassified	soil	0	0
																ASV495	Actinobacteria	Acidimicrobiia	Microtrichales	unclassified	unclassified	gut	7.5	4.32187
																ASV495	Actinobacteria	Acidimicrobiia	Microtrichales	unclassified	unclassified	cast	5.6	2.42509
																ASV496	Actinobacteria	Acidimicrobiia	unclassified	unclassified	unclassified	soil	8	1.77869
																ASV496	Actinobacteria	Acidimicrobiia	unclassified	unclassified	unclassified	gut	2.5	2.5
																ASV496	Actinobacteria	Acidimicrobiia	unclassified	unclassified	unclassified	cast	0	0
																ASV526	Actinobacteria	Thermoleophilia	Gaiellales	unclassified	unclassified	soil	0	0
																ASV526	Actinobacteria	Thermoleophilia	Gaiellales	unclassified	unclassified	gut	20.125	10.5024
																ASV526	Actinobacteria	Thermoleophilia	Gaiellales	unclassified	unclassified	cast	0	0
																ASV546	Actinobacteria	Actinobacteria	Micromonosporales	Micromonosporaceae	unclassified	soil	8.15789	2.64494
																ASV546	Actinobacteria	Actinobacteria	Micromonosporales	Micromonosporaceae	unclassified	gut	0	0
																ASV546	Actinobacteria	Actinobacteria	Micromonosporales	Micromonosporaceae	unclassified	cast	0	0
																ASV547	Actinobacteria	Actinobacteria	Micromonosporales	Micromonosporaceae	unclassified	soil	0	0
																ASV547	Actinobacteria	Actinobacteria	Micromonosporales	Micromonosporaceae	unclassified	gut	8.875	4.94772
																ASV547	Actinobacteria	Actinobacteria	Micromonosporales	Micromonosporaceae	unclassified	cast	4.15	1.91019
																ASV55	Actinobacteria	Actinobacteria	Frankiales	Acidothermaceae	Acidothermus	soil	29.3684	3.15229
																ASV55	Actinobacteria	Actinobacteria	Frankiales	Acidothermaceae	Acidothermus	gut	43.625	10.0693
																ASV55	Actinobacteria	Actinobacteria	Frankiales	Acidothermaceae	Acidothermus	cast	25.9	3.02785
																ASV559	Actinobacteria	Actinobacteria	Corynebacteriales	Mycobacteriaceae	Mycobacterium	soil	1.47368	1.47368
																ASV559	Actinobacteria	Actinobacteria	Corynebacteriales	Mycobacteriaceae	Mycobacterium	gut	7.25	7.25
																ASV559	Actinobacteria	Actinobacteria	Corynebacteriales	Mycobacteriaceae	Mycobacterium	cast	3.25	2.30203
																ASV567	Actinobacteria	Actinobacteria	Frankiales	Nakamurellaceae	Nakamurella	soil	0	0
																ASV567	Actinobacteria	Actinobacteria	Frankiales	Nakamurellaceae	Nakamurella	gut	5.5	3.90512
																ASV567	Actinobacteria	Actinobacteria	Frankiales	Nakamurellaceae	Nakamurella	cast	5.15	2.26213
																ASV571	Actinobacteria	Actinobacteria	Frankiales	Geodermatophilaceae	unclassified	soil	0.421053	0.421053
																ASV571	Actinobacteria	Actinobacteria	Frankiales	Geodermatophilaceae	unclassified	gut	10.375	7.39676
																ASV571	Actinobacteria	Actinobacteria	Frankiales	Geodermatophilaceae	unclassified	cast	2.75	1.02051
																ASV585	Actinobacteria	Acidimicrobiia	Microtrichales	Ilumatobacteraceae	unclassified	soil	0.947368	0.668741
																ASV585	Actinobacteria	Acidimicrobiia	Microtrichales	Ilumatobacteraceae	unclassified	gut	9.125	6.28046
																ASV585	Actinobacteria	Acidimicrobiia	Microtrichales	Ilumatobacteraceae	unclassified	cast	2.6	1.24054
																ASV590	Actinobacteria	Thermoleophilia	Solirubrobacterales	unclassified	unclassified	soil	0	0
																ASV590	Actinobacteria	Thermoleophilia	Solirubrobacterales	unclassified	unclassified	gut	17.625	14.5036
																ASV590	Actinobacteria	Thermoleophilia	Solirubrobacterales	unclassified	unclassified	cast	0	0
																ASV594	Actinobacteria	Actinobacteria	Pseudonocardiales	Pseudonocardiaceae	Actinomycetospora	soil	0	0
																ASV594	Actinobacteria	Actinobacteria	Pseudonocardiales	Pseudonocardiaceae	Actinomycetospora	gut	15.875	10.4274
																ASV594	Actinobacteria	Actinobacteria	Pseudonocardiales	Pseudonocardiaceae	Actinomycetospora	cast	0.65	0.65
																ASV595	Actinobacteria	Thermoleophilia	Solirubrobacterales	unclassified	unclassified	soil	1.78947	0.860365
																ASV595	Actinobacteria	Thermoleophilia	Solirubrobacterales	unclassified	unclassified	gut	9.125	2.72185
																ASV595	Actinobacteria	Thermoleophilia	Solirubrobacterales	unclassified	unclassified	cast	1.65	0.768714
																ASV601	Actinobacteria	Thermoleophilia	Gaiellales	unclassified	unclassified	soil	0	0
																ASV601	Actinobacteria	Thermoleophilia	Gaiellales	unclassified	unclassified	gut	3.5	2.32225
																ASV601	Actinobacteria	Thermoleophilia	Gaiellales	unclassified	unclassified	cast	5.5	2.58182
																ASV620	Actinobacteria	Acidimicrobiia	IMCC26256	unclassified	unclassified	soil	0	0
																ASV620	Actinobacteria	Acidimicrobiia	IMCC26256	unclassified	unclassified	gut	16.875	6.02209
																ASV620	Actinobacteria	Acidimicrobiia	IMCC26256	unclassified	unclassified	cast	0	0
																ASV636	Actinobacteria	Actinobacteria	Micromonosporales	Micromonosporaceae	Actinoplanes	soil	1.42105	0.977273
																ASV636	Actinobacteria	Actinobacteria	Micromonosporales	Micromonosporaceae	Actinoplanes	gut	7	4.82553
																ASV636	Actinobacteria	Actinobacteria	Micromonosporales	Micromonosporaceae	Actinoplanes	cast	2.4	1.77616
																ASV68	Actinobacteria	Actinobacteria	Micrococcales	Cellulomonadaceae	Cellulomonas	soil	5.63158	1.51061
																ASV68	Actinobacteria	Actinobacteria	Micrococcales	Cellulomonadaceae	Cellulomonas	gut	34.375	12.9089
																ASV68	Actinobacteria	Actinobacteria	Micrococcales	Cellulomonadaceae	Cellulomonas	cast	41.2	5.935
																ASV683	Actinobacteria	Actinobacteria	Propionibacteriales	Nocardioidaceae	Marmoricola	soil	0	0
																ASV683	Actinobacteria	Actinobacteria	Propionibacteriales	Nocardioidaceae	Marmoricola	gut	10.75	9.40317
																ASV683	Actinobacteria	Actinobacteria	Propionibacteriales	Nocardioidaceae	Marmoricola	cast	1.7	1.17227
																ASV689	Actinobacteria	Thermoleophilia	Gaiellales	unclassified	unclassified	soil	6.31579	2.96377
																ASV689	Actinobacteria	Thermoleophilia	Gaiellales	unclassified	unclassified	gut	0	0
																ASV689	Actinobacteria	Thermoleophilia	Gaiellales	unclassified	unclassified	cast	0	0
																ASV696	Actinobacteria	Thermoleophilia	Gaiellales	unclassified	unclassified	soil	2.26316	1.25619
																ASV696	Actinobacteria	Thermoleophilia	Gaiellales	unclassified	unclassified	gut	7.25	3.18899
																ASV696	Actinobacteria	Thermoleophilia	Gaiellales	unclassified	unclassified	cast	0.8	0.8
																ASV701	Actinobacteria	Thermoleophilia	Gaiellales	unclassified	unclassified	soil	0	0
																ASV701	Actinobacteria	Thermoleophilia	Gaiellales	unclassified	unclassified	gut	14.5	6.22782
																ASV701	Actinobacteria	Thermoleophilia	Gaiellales	unclassified	unclassified	cast	0	0
																ASV71	Actinobacteria	Thermoleophilia	Solirubrobacterales	Solirubrobacteraceae	Conexibacter	soil	16.1053	3.02223
																ASV71	Actinobacteria	Thermoleophilia	Solirubrobacterales	Solirubrobacteraceae	Conexibacter	gut	24.625	9.62871
																ASV71	Actinobacteria	Thermoleophilia	Solirubrobacterales	Solirubrobacteraceae	Conexibacter	cast	33.4	6.85466
																ASV714	Actinobacteria	Actinobacteria	Corynebacteriales	Mycobacteriaceae	Mycobacterium	soil	4.57895	2.62056
																ASV714	Actinobacteria	Actinobacteria	Corynebacteriales	Mycobacteriaceae	Mycobacterium	gut	3.25	3.25
																ASV714	Actinobacteria	Actinobacteria	Corynebacteriales	Mycobacteriaceae	Mycobacterium	cast	0	0
																ASV716	Actinobacteria	Acidimicrobiia	Microtrichales	Ilumatobacteraceae	CL500-29_marine_group	soil	0.578947	0.578947
																ASV716	Actinobacteria	Acidimicrobiia	Microtrichales	Ilumatobacteraceae	CL500-29_marine_group	gut	2.625	2.625
																ASV716	Actinobacteria	Acidimicrobiia	Microtrichales	Ilumatobacteraceae	CL500-29_marine_group	cast	4	1.72138
																ASV717	Actinobacteria	Actinobacteria	Frankiales	Acidothermaceae	Acidothermus	soil	0.789474	0.789474
																ASV717	Actinobacteria	Actinobacteria	Frankiales	Acidothermaceae	Acidothermus	gut	12.125	4.51362
																ASV717	Actinobacteria	Actinobacteria	Frankiales	Acidothermaceae	Acidothermus	cast	0	0
																ASV725	Actinobacteria	Thermoleophilia	Gaiellales	unclassified	unclassified	soil	2.63158	1.83407
																ASV725	Actinobacteria	Thermoleophilia	Gaiellales	unclassified	unclassified	gut	7.625	5.0988
																ASV725	Actinobacteria	Thermoleophilia	Gaiellales	unclassified	unclassified	cast	0	0
																ASV745	Actinobacteria	Acidimicrobiia	IMCC26256	unclassified	unclassified	soil	0	0
																ASV745	Actinobacteria	Acidimicrobiia	IMCC26256	unclassified	unclassified	gut	13.375	6.80582
																ASV745	Actinobacteria	Acidimicrobiia	IMCC26256	unclassified	unclassified	cast	0	0
																ASV751	Actinobacteria	Acidimicrobiia	IMCC26256	unclassified	unclassified	soil	2.73684	1.88227
																ASV751	Actinobacteria	Acidimicrobiia	IMCC26256	unclassified	unclassified	gut	6.75	4.42295
																ASV751	Actinobacteria	Acidimicrobiia	IMCC26256	unclassified	unclassified	cast	0	0
																ASV768	Actinobacteria	Actinobacteria	Frankiales	Acidothermaceae	Acidothermus	soil	0	0
																ASV768	Actinobacteria	Actinobacteria	Frankiales	Acidothermaceae	Acidothermus	gut	12.875	11.259
																ASV768	Actinobacteria	Actinobacteria	Frankiales	Acidothermaceae	Acidothermus	cast	0	0
																ASV779	Actinobacteria	Actinobacteria	Pseudonocardiales	Pseudonocardiaceae	Amycolatopsis	soil	1.36842	1.08205
																ASV779	Actinobacteria	Actinobacteria	Pseudonocardiales	Pseudonocardiaceae	Amycolatopsis	gut	9.5	6.27353
																ASV779	Actinobacteria	Actinobacteria	Pseudonocardiales	Pseudonocardiaceae	Amycolatopsis	cast	0	0
																ASV785	Actinobacteria	Thermoleophilia	Gaiellales	unclassified	unclassified	soil	1.63158	1.22644
																ASV785	Actinobacteria	Thermoleophilia	Gaiellales	unclassified	unclassified	gut	5.5	5.5
																ASV785	Actinobacteria	Thermoleophilia	Gaiellales	unclassified	unclassified	cast	1.3	1.3
																ASV79	Actinobacteria	Actinobacteria	Micrococcales	Microbacteriaceae	unclassified	soil	0.947368	0.947368
																ASV79	Actinobacteria	Actinobacteria	Micrococcales	Microbacteriaceae	unclassified	gut	1.5	1.5
																ASV79	Actinobacteria	Actinobacteria	Micrococcales	Microbacteriaceae	unclassified	cast	50.4	7.73828
																ASV790	Actinobacteria	Actinobacteria	Frankiales	unclassified	unclassified	soil	1.47368	1.47368
																ASV790	Actinobacteria	Actinobacteria	Frankiales	unclassified	unclassified	gut	3.875	1.757
																ASV790	Actinobacteria	Actinobacteria	Frankiales	unclassified	unclassified	cast	2.05	1.12501
																ASV796	Actinobacteria	Actinobacteria	Micromonosporales	Micromonosporaceae	unclassified	soil	1.36842	1.36842
																ASV796	Actinobacteria	Actinobacteria	Micromonosporales	Micromonosporaceae	unclassified	gut	6.5	4.272
[truncated: 4,816 more rows]

## Sheet: ST5
Supplementary Table S5. Summary of DMM analysis showing which ASVs were most responsible for separating the two communities (soil-gut and casts)
[truncated: 4,917 more rows]
